# Supplementary material for: DFT study of rhodium-catalyzed transformation of silacyclobutane with alkyne or H2O: Si–Cl bond reductive elimination vs. alkyne insertion
Source: Royal Society of Chemistry journal article supplement (doi:10.1039/d4qo00440j), 2024-01-01
Supplement: d4qo00440j1.pdf [file d4qo00440j1.pdf]

## Supporting Information

### DFT Study of Rhodium-Catalyzed Transformation of Silacyclobutane with Alkyne or H<sub>2</sub>O:

#### Si–Cl Bond Reductive Elimination vs Alkyne Insertion †

Jinxia Li,<sup>\*a</sup> Weichi Chen,<sup>b</sup> Shuanglin Qu<sup>\*b</sup>

<sup>a</sup>College of Pharmacy, Changzhi Medical College, Changzhi 046000, P. R. China

<sup>b</sup>College of Chemistry and Chemical Engineering, Hunan University, Changsha 410082, P. R. China.

Emails: [squ@hnu.edu.cn](mailto:squ@hnu.edu.cn)

[lijinxia@hnu.edu.cn](mailto:lijinxia@hnu.edu.cn)

#### Table of Content

- P<sub>S2</sub>. Various possible transition states starting from intermediate **INT2a**.
- P<sub>S3</sub>. Various possible transition states starting from intermediate **INT7a**.
- P<sub>S4</sub>. The energies of alkyne insertion transition states **TS2b** (one PPh<sub>3</sub>-coordinated) and **TS6b** (two PPh<sub>3</sub>-coordinated).
- P<sub>S5</sub>. The energies of various possible Si–Cl bond reductive elimination transition states **TS4b/TS7b/TS8b** and alkyne insertion transition state **TS2b**.
- P<sub>S6</sub>. Free energy profile for the generation of [Rh]–H species **CAT1** via C–Si bond activation, Si–Cl bond reductive elimination and  $\beta$ -hydride elimination in THF solvent.
- P<sub>S7</sub>. The C–H bond oxidative addition and reductive elimination pathways at  $\alpha$  site of silanol product **6**.
- P<sub>S8</sub>. Optimized structures of key intermediates and transition states of the newly proposed Rh/BINAP- catalyzed C(sp)–H/O–H silylation pathway.
- P<sub>S9</sub>. B3LYP-D3(BJ) and M06 calculated absolute energies of all structures.
- P<sub>S12</sub>. Cartesian coordinates for DFT-optimized structures for all the optimized compounds and transition state.

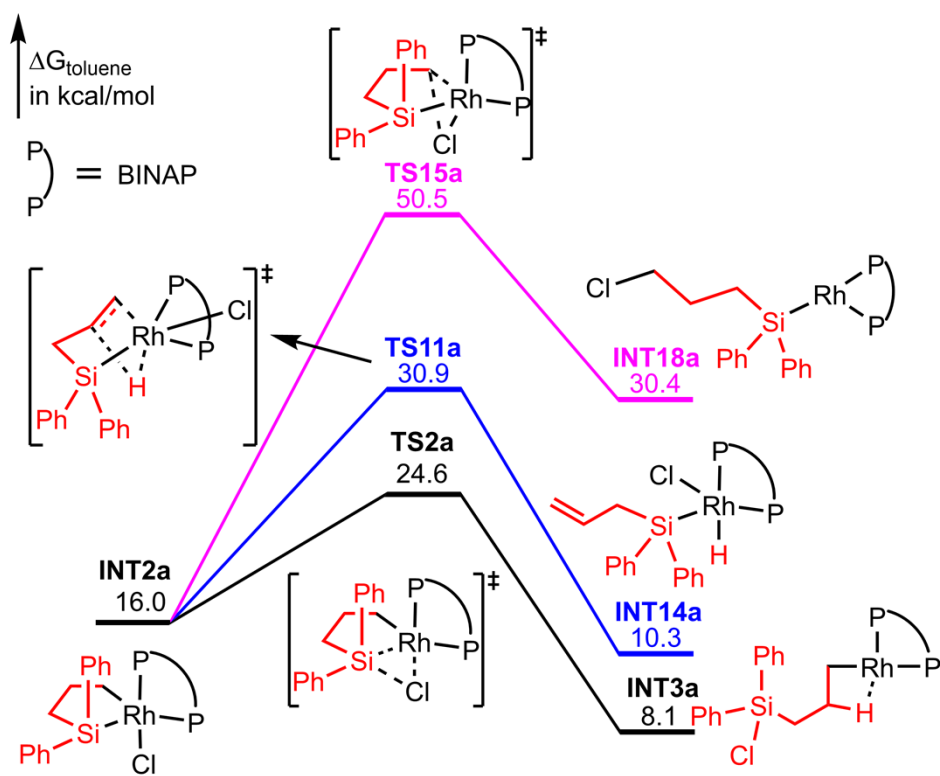

**Fig. S1** Various possible transition states starting from intermediate INT2a.

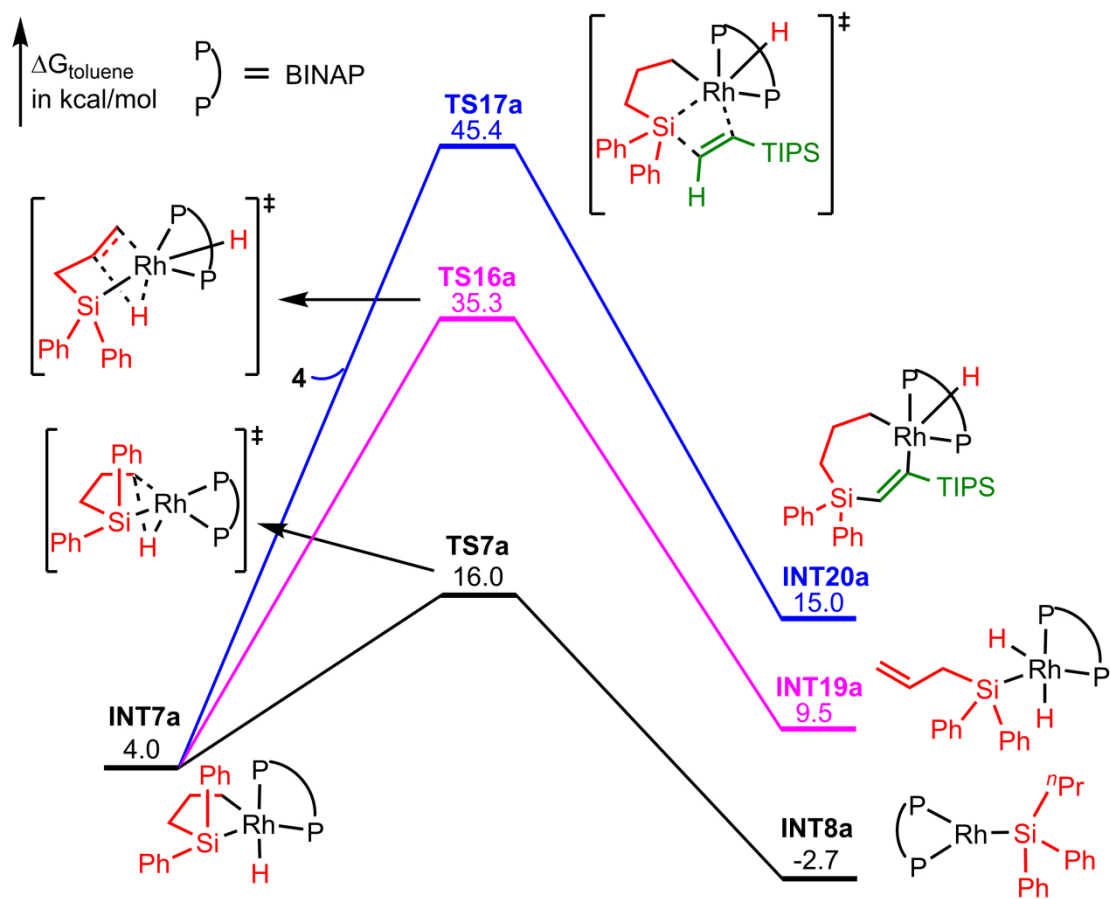

**Fig. S2** Various possible transition states starting from intermediate **INT7a**.

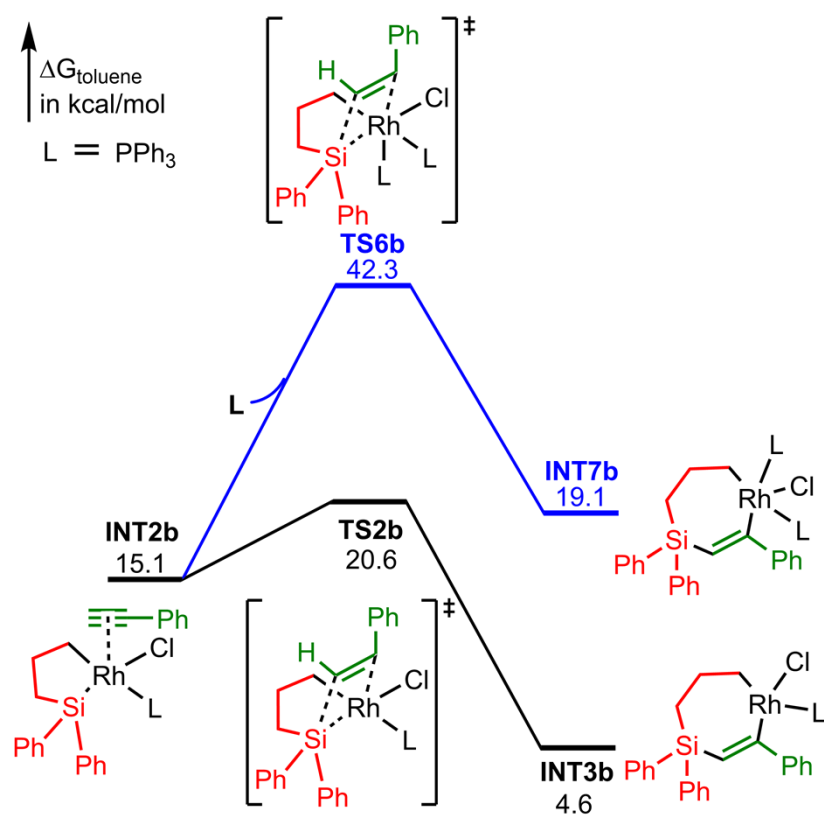

**Fig. S3** The energies of alkyne insertion transition states **TS2b** (one  $\text{PPh}_3$ -coordinated) and **TS6b** (two  $\text{PPh}_3$ -coordinated).

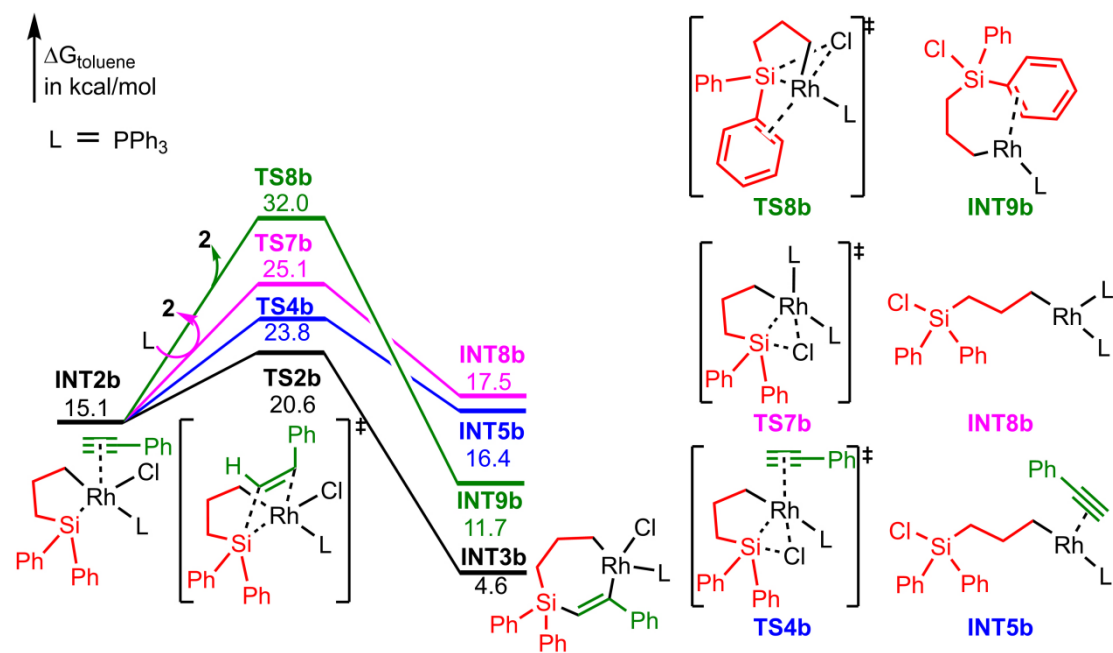

**Fig. S4** The energies of various possible Si-Cl bond reductive elimination transition states **TS4b/TS7b/TS8b** and alkyne insertion transition state **TS2b**.

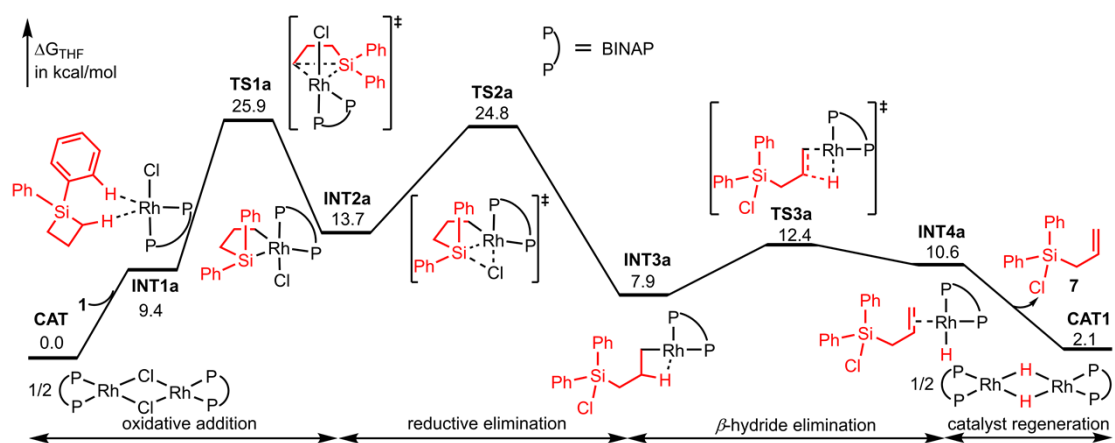

**Fig. S5** Free energy profile for the generation of [Rh]-H species **CAT1** via C-Si activation, Si-Cl bond reductive elimination and  $\beta$ -hydride elimination in THF solvent.

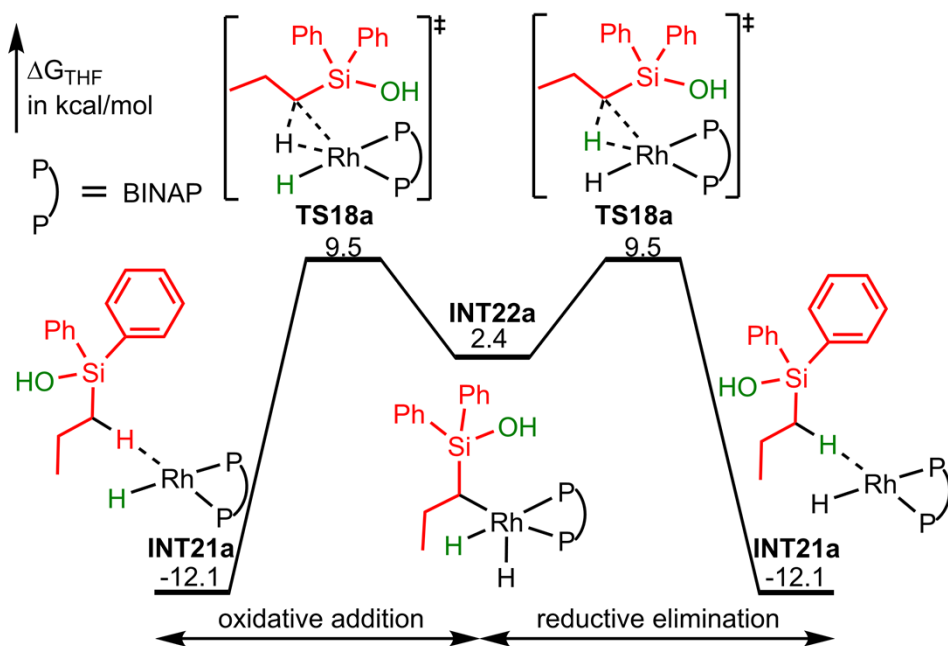

**Fig. S6** The C(sp<sup>3</sup>)-H bond oxidative addition and reductive elimination pathways at  $\alpha$  site of silanol product **6**.

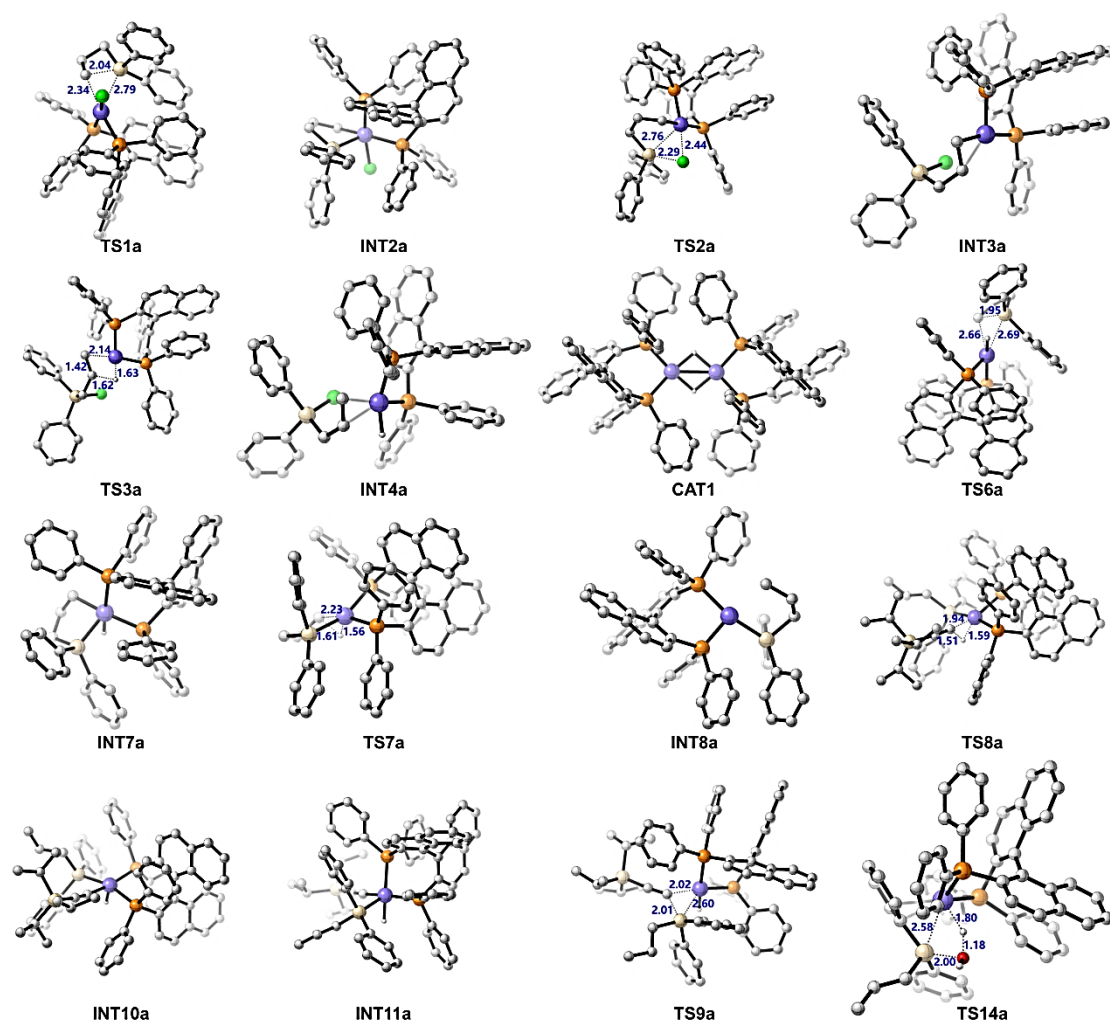

**Fig. S7.** Optimized structures of key intermediates and transition states of the newly proposed Rh/BINAP-catalyzed C(sp)-H/O-H silylation pathway.



**2. SMD(toluene or tetrahydrofuran)/M06/6-311++G(d,p)//B3LYP-D3(BJ)/6-31G(d) (SDD basis set for Rh atom) calculated absolute energies of all structures.**

**Table S1.** SMD(toluene or tetrahydrofuran)/M06/6-311++G(d,p)//B3LYP-D3(BJ)/6-31G(d) (SDD basis set for Rh atom) calculated absolute energies of all structures. Values are given in Hartree.

| Geometry              | $E_{(\text{elec-B3-LYP-D3BJ})}^1$ | $H_{(\text{corr-B3-LYP-D3BJ})}^2$ | $G_{(\text{corr-B3-LYP-D3BJ})}^3$ | $E_{(\text{solv-M06})}^4$ | IF <sup>5</sup> |
|-----------------------|-----------------------------------|-----------------------------------|-----------------------------------|---------------------------|-----------------|
| <b>1</b>              | -870.786028                       | 0.281894                          | 0.22295                           | -870.406676               |                 |
| <b>2</b>              | -308.41145                        | 0.117056                          | 0.07919                           | -308.23117                |                 |
| <b>3</b>              | -1179.305608                      | 0.405075                          | 0.330565                          | -1178.729189              |                 |
| <b>4</b>              | -721.938251                       | 0.322845                          | 0.261119                          | -721.644045               |                 |
| <b>5</b>              | -1592.795739                      | 0.609437                          | 0.505131                          | -1592.106828              |                 |
| <b>6</b>              | -947.286916                       | 0.310663                          | 0.245576                          | -946.902969               |                 |
| <b>7</b>              | -1330.436103                      | 0.273863                          | 0.208792                          | -1330.057542              |                 |
| <b>CAT</b>            | -5899.701428                      | 1.341115                          | 1.142714                          | -5897.331079              |                 |
| <b>CAT1</b>           | -4980.373661                      | 1.348845                          | 1.154742                          | -4978.004804              |                 |
| <b>CAT2</b>           | -3680.116959                      | 0.887396                          | 0.742052                          | -3678.675966              |                 |
| <b>CAT3</b>           | -4368.124243                      | 1.196303                          | 1.009549                          | -4366.16034               |                 |
| <b>H<sub>2</sub>O</b> | -76.407598                        | 0.024917                          | 0.003472                          | -76.42504                 |                 |
| <b>HCl</b>            | -460.792833                       | 0.009994                          | -0.011204                         | -460.796793               |                 |
| <b>INT1a</b>          | -3820.625403                      | 0.953536                          | 0.801686                          | -3819.060602              |                 |
| <b>INT1</b>           | -3671.789256                      | 0.994874                          | 0.844925                          | -3670.308817              |                 |
| <b>INT2a</b>          | -3820.63958                       | 0.954716                          | 0.808814                          | -3819.06116               |                 |
| <b>INT1b</b>          | -2952.140109                      | 0.711212                          | 0.58162                           | -2950.979064              |                 |
| <b>INT2</b>           | -3671.769027                      | 0.992292                          | 0.837551                          | -3670.281379              |                 |
| <b>INT3a</b>          | -3820.62493                       | 0.951675                          | 0.800492                          | -3819.065507              |                 |
| <b>INT2b</b>          | -2786.547931                      | 0.70283                           | 0.583237                          | -2785.445572              |                 |
| <b>INT3</b>           | -3210.921522                      | 0.97988                           | 0.829373                          | -3209.4503                |                 |
| <b>INT4a</b>          | -3820.621948                      | 0.949637                          | 0.798842                          | -3819.059776              |                 |
| <b>INT3b</b>          | -2786.554714                      | 0.703092                          | 0.580623                          | -2785.459815              |                 |
| <b>INT4</b>           | -4081.78698                       | 1.265273                          | 1.08561                           | -4079.894463              |                 |
| <b>INT5a</b>          | -4542.593108                      | 1.281536                          | 1.100538                          | -4540.70156               |                 |
| <b>INT4b</b>          | -2786.613225                      | 0.705656                          | 0.586122                          | -2785.521532              |                 |
| <b>INT5</b>           | -4081.771359                      | 1.262247                          | 1.083303                          | -4079.87557               |                 |
| <b>INT6a</b>          | -3360.95998                       | 0.956921                          | 0.81013                           | -3359.394198              |                 |
| <b>INT7a</b>          | -3361.000382                      | 0.958688                          | 0.815884                          | -3359.422412              |                 |
| <b>INT5b</b>          | -2786.526277                      | 0.701338                          | 0.577399                          | -2785.437765              |                 |
| <b>INT8a</b>          | -3361.00419                       | 0.961736                          | 0.816674                          | -3359.433899              |                 |
| <b>INT6b</b>          | -2786.511926                      | 0.697467                          | 0.572024                          | -2785.429779              |                 |
| <b>INT9a</b>          | -4082.977613                      | 1.285995                          | 1.098914                          | -4081.097912              |                 |
| <b>INT7b</b>          | -3822.968158                      | 0.998446                          | 0.843571                          | -3821.391218              |                 |
| <b>INT8b</b>          | -3514.498644                      | 0.877509                          | 0.735949                          | -3513.134053              |                 |
| <b>INT9b</b>          | -2478.070669                      | 0.581655                          | 0.47015                           | -2477.18597               |                 |

|               |              |          |          |              |          |
|---------------|--------------|----------|----------|--------------|----------|
| <b>INT10a</b> | -4082.99427  | 1.28487  | 1.098695 | -4081.101361 |          |
| <b>INT11a</b> | -4083.010635 | 1.285952 | 1.101549 | -4081.115266 |          |
| <b>INT12a</b> | -4083.000165 | 1.285679 | 1.099701 | -4081.114957 |          |
| <b>INT13a</b> | -4129.088074 | 1.074758 | 0.913911 | -4127.312227 |          |
| <b>INT14a</b> | -3820.640963 | 0.950915 | 0.802651 | -3819.068528 |          |
| <b>INT15a</b> | -3359.774726 | 0.93705  | 0.789164 | -3358.214027 |          |
| <b>INT16a</b> | -3436.215515 | 0.960987 | 0.807839 | -3434.649669 |          |
| <b>INT17a</b> | -3437.455632 | 0.98575  | 0.833355 | -3435.883086 |          |
| <b>INT18a</b> | -3820.603458 | 0.954345 | 0.805406 | -3819.034905 |          |
| <b>INT19a</b> | -3360.986147 | 0.954323 | 0.808736 | -3359.406421 |          |
| <b>INT20a</b> | -4082.971574 | 1.286252 | 1.10604  | -4081.077969 |          |
| <b>INT21a</b> | -3437.458068 | 0.98579  | 0.830253 | -3435.884007 |          |
| <b>INT22a</b> | -3437.456146 | 0.984516 | 0.835024 | -3435.865654 |          |
| <b>L</b>      | -1036.366921 | 0.29161  | 0.228394 | -1035.919965 |          |
| <b>TS1</b>    | -3671.754613 | 0.990415 | 0.835893 | -3670.275873 | 753.58i  |
| <b>TS1a</b>   | -3820.610391 | 0.952949 | 0.808497 | -3819.042753 | 100.07i  |
| <b>TS1b</b>   | -2786.524004 | 0.700596 | 0.578841 | -2785.43151  | 62.68i   |
| <b>TS2</b>    | -3671.74236  | 0.98878  | 0.834142 | -3670.262564 | 50.33i   |
| <b>TS2a</b>   | -3820.621403 | 0.953424 | 0.8106   | -3819.049212 | 82.19i   |
| <b>TS2b</b>   | -2786.535036 | 0.701649 | 0.582516 | -2785.436215 | 115.70i  |
| <b>TS3a</b>   | -3820.616326 | 0.948032 | 0.797896 | -3819.056186 | 603.71i  |
| <b>TS3b</b>   | -2786.54992  | 0.702341 | 0.582053 | -2785.4561   | 263.65i  |
| <b>TS4</b>    | -4081.75108  | 1.260153 | 1.083046 | -4079.861241 | 810.73i  |
| <b>TS4a</b>   | -4542.574925 | 1.280441 | 1.102664 | -4540.686004 | 90.97i   |
| <b>TS4b</b>   | -2786.521252 | 0.700968 | 0.581425 | -2785.429923 | 70.71i   |
| <b>TS5a</b>   | -4542.568318 | 1.280955 | 1.102386 | -4540.67326  | 412.49i  |
| <b>TS5b</b>   | -2786.50389  | 0.695826 | 0.570266 | -2785.424612 | 671.40i  |
| <b>TS6a</b>   | -3360.95694  | 0.956057 | 0.810982 | -3359.390703 | 23.36i   |
| <b>TS6b</b>   | -3822.931941 | 0.997464 | 0.845719 | -3821.356279 | 94.05i   |
| <b>TS7a</b>   | -3360.977472 | 0.956888 | 0.814742 | -3359.402091 | 888.65i  |
| <b>TS7b</b>   | -3514.493044 | 0.876857 | 0.738011 | -3513.124114 | -82.45i  |
| <b>TS8b</b>   | -2478.052468 | 0.581158 | 0.476746 | -2477.160249 | -96.16i  |
| <b>TS8a</b>   | -4082.97203  | 1.282991 | 1.097053 | -4081.089507 | 669.46i  |
| <b>TS9a</b>   | -4082.978662 | 1.284368 | 1.099006 | -4081.094277 | 57.13i   |
| <b>TS10a</b>  | -4129.048878 | 1.073856 | 0.915734 | -4127.272822 | 94.09i   |
| <b>TS11a</b>  | -3820.620321 | 0.950086 | 0.807232 | -3819.038876 | 725.74i  |
| <b>TS12a</b>  | -3820.598997 | 0.94806  | 0.799997 | -3819.026626 | 105.71i  |
| <b>TS13a</b>  | -3436.164877 | 0.958731 | 0.808962 | -3434.598425 | 401.67i  |
| <b>TS14a</b>  | -3437.400592 | 0.98223  | 0.831982 | -3435.829808 | 777.76i  |
| <b>TS15a</b>  | -3820.574632 | 0.951145 | 0.804834 | -3819.002229 | 293.91i  |
| <b>TS16a</b>  | -3360.955577 | 0.953527 | 0.813359 | -3359.369998 | -686.39i |
| <b>TS17a</b>  | -4082.927046 | 1.28476  | 1.110139 | -4081.033622 | -122.40i |
| <b>TS18a</b>  | -3437.431723 | 0.982064 | 0.831095 | -3435.850388 | 895.16i  |

<sup>1</sup>The electronic energy calculated by B3LYP-D3(BJ) in gas phase. <sup>2</sup>The thermal correction to

enthalpy calculated by B3LYP-D3(BJ) in gas phase. <sup>3</sup>The thermal correction to Gibbs free energy calculated by B3LYP-D3(BJ) in gas phase. <sup>4</sup>The electronic energy calculated by M06 in toluene or tetrahydrofuran solvent. <sup>5</sup>The B3LYP-D3(BJ) calculated imaginary frequencies for the transition states.

### 3. Cartesian coordinates of DFT-optimized structures for all intermediates and transition states.

|          |           |           |           |          |           |           |           |
|----------|-----------|-----------|-----------|----------|-----------|-----------|-----------|
| <b>1</b> |           |           |           | 6        | 0.316762  | 0.499519  | -1.759465 |
| 6        | 0.758144  | 3.223641  | -0.039313 | 1        | 0.210661  | -0.408421 | -2.373195 |
| 6        | 0.112952  | 2.407551  | -1.208040 | 6        | 1.783403  | 1.118077  | 1.742560  |
| 6        | 0.245015  | 2.415160  | 1.197193  | 1        | 2.066465  | 1.914905  | 2.443067  |
| 1        | 1.850367  | 3.156611  | -0.101035 | 1        | 1.939920  | 0.164330  | 2.260551  |
| 1        | 0.496028  | 4.288458  | -0.028906 | 1        | 2.479550  | 1.157097  | 0.899237  |
| 1        | 0.709705  | 2.329964  | -2.120463 | 6        | -0.600418 | 1.248168  | 2.549695  |
| 1        | -0.870410 | 2.814011  | -1.473517 | 1        | -0.287711 | 2.005975  | 3.280478  |
| 1        | 0.925794  | 2.359117  | 2.051327  | 1        | -1.646245 | 1.433113  | 2.289007  |
| 1        | -0.715434 | 2.806553  | 1.552219  | 1        | -0.553522 | 0.273600  | 3.053043  |
| 14       | -0.008164 | 0.947686  | 0.010026  | 6        | 1.792727  | -2.060403 | 0.094856  |
| 6        | 1.465647  | -0.215635 | -0.035844 | 1        | 2.080627  | -3.063975 | 0.435044  |
| 6        | 1.425228  | -1.400371 | -0.793678 | 1        | 1.947688  | -2.032331 | -0.990326 |
| 6        | 2.657027  | 0.085859  | 0.646196  | 1        | 2.486338  | -1.346187 | 0.548900  |
| 6        | 2.530667  | -2.247519 | -0.870886 | 6        | -0.587969 | -2.834742 | -0.193725 |
| 1        | 0.513821  | -1.669699 | -1.321912 | 1        | -0.269868 | -3.845206 | 0.095873  |
| 6        | 3.766719  | -0.757218 | 0.572897  | 1        | -1.633940 | -2.706763 | 0.098666  |
| 1        | 2.719794  | 0.989570  | 1.246912  | 1        | -0.543148 | -2.782243 | -1.289434 |
| 6        | 3.704964  | -1.926284 | -0.187008 | 6        | 1.785415  | 0.955682  | -1.834722 |
| 1        | 2.476177  | -3.158447 | -1.461090 | 1        | 2.482807  | 0.208055  | -1.444886 |
| 1        | 4.676720  | -0.504795 | 1.110752  | 1        | 2.070582  | 1.164606  | -2.874337 |
| 1        | 4.566792  | -2.585724 | -0.243956 | 1        | 1.937627  | 1.881800  | -1.267548 |
| 6        | -1.594573 | -0.053471 | 0.052805  | 6        | -0.598627 | 1.582994  | -2.356903 |
| 6        | -2.768120 | 0.428610  | -0.552650 | 1        | -0.556470 | 2.505824  | -1.763631 |
| 6        | -1.659833 | -1.288053 | 0.724365  | 1        | -0.283308 | 1.838798  | -3.377313 |
| 6        | -3.962206 | -0.290415 | -0.490116 | 1        | -1.643378 | 1.261620  | -2.390560 |
| 1        | -2.749053 | 1.376468  | -1.084979 | 1        | -4.362229 | -0.012002 | -0.002194 |
| 6        | -2.851395 | -2.009991 | 0.792983  | 14       | -0.232563 | -0.000617 | -0.000152 |
| 1        | -0.765398 | -1.694240 | 1.189800  |          |           |           |           |
| 6        | -4.005300 | -1.511591 | 0.184849  | <b>5</b> |           |           |           |
| 1        | -4.856715 | 0.098943  | -0.968955 | 6        | -3.980481 | -0.254609 | 2.397532  |
| 1        | -2.879774 | -2.961965 | 1.316433  | 6        | -4.513162 | -0.491231 | 3.813627  |
| 1        | -4.933745 | -2.074065 | 0.234474  | 6        | -2.450534 | -0.388165 | 2.306097  |
|          |           |           |           | 1        | -4.453921 | -0.964054 | 1.705914  |
| <b>4</b> |           |           |           | 1        | -4.277604 | 0.745668  | 2.056979  |
| 6        | -2.079294 | -0.005716 | -0.000931 | 1        | -4.256775 | -1.497727 | 4.166610  |
| 6        | -3.294779 | -0.009064 | -0.001390 | 1        | -5.603835 | -0.388355 | 3.855497  |
| 6        | 0.322002  | -1.772309 | 0.448077  | 1        | -1.971553 | 0.332335  | 2.983433  |
| 1        | 0.213267  | -1.850026 | 1.540958  | 1        | -2.135968 | -1.381852 | 2.656221  |
| 6        | 0.313579  | 1.275422  | 1.311738  | 14       | -1.761394 | -0.099717 | 0.572175  |
| 1        | 0.203372  | 2.260298  | 0.831995  | 6        | -2.419295 | -1.395993 | -0.616845 |

|   |           |           |           |          |           |           |           |
|---|-----------|-----------|-----------|----------|-----------|-----------|-----------|
| 6 | -2.845119 | -2.655702 | -0.163368 | 1        | 2.120878  | -1.965604 | 2.482583  |
| 6 | -2.464185 | -1.142394 | -1.998855 | 1        | 3.120302  | -2.967718 | 1.424947  |
| 6 | -3.299811 | -3.628406 | -1.054664 | 6        | 4.840135  | -0.650482 | -1.966918 |
| 1 | -2.822060 | -2.884272 | 0.899274  | 1        | 5.676362  | -0.740713 | -1.266249 |
| 6 | -2.915128 | -2.111499 | -2.895092 | 1        | 5.064504  | -1.285983 | -2.833887 |
| 1 | -2.149753 | -0.172929 | -2.376480 | 1        | 4.817413  | 0.385320  | -2.324349 |
| 6 | -3.334845 | -3.356889 | -2.423350 | 6        | 2.361794  | -0.943240 | -2.378208 |
| 1 | -3.626915 | -4.595620 | -0.682514 | 1        | 1.404425  | -1.288227 | -1.977289 |
| 1 | -2.941908 | -1.895398 | -3.959786 | 1        | 2.223595  | 0.091995  | -2.711472 |
| 1 | -3.689108 | -4.112267 | -3.119590 | 1        | 2.598512  | -1.544198 | -3.266576 |
| 6 | -2.206276 | 1.611235  | -0.063479 | 14       | 3.113482  | -0.113791 | 0.284379  |
| 6 | -1.289423 | 2.674254  | -0.004505 |          |           |           |           |
| 6 | -3.487409 | 1.870750  | -0.582656 | <b>2</b> |           |           |           |
| 6 | -1.638657 | 3.951936  | -0.443677 | 6        | 3.231646  | 0.000024  | -0.000091 |
| 1 | -0.289663 | 2.495185  | 0.381934  | 6        | 2.021780  | -0.000065 | 0.000127  |
| 6 | -3.841848 | 3.146761  | -1.021911 | 6        | 0.593396  | -0.000032 | 0.000061  |
| 1 | -4.211765 | 1.063461  | -0.658806 | 6        | -0.119257 | -1.213230 | 0.000031  |
| 6 | -2.916668 | 4.190300  | -0.952191 | 6        | -0.119199 | 1.213202  | 0.000030  |
| 1 | -0.912928 | 4.759357  | -0.393577 | 6        | -1.511513 | -1.208661 | -0.000020 |
| 1 | -4.836100 | 3.326153  | -1.422351 | 1        | 0.430606  | -2.148785 | 0.000049  |
| 1 | -3.189699 | 5.183957  | -1.297185 | 6        | -1.511455 | 1.208700  | -0.000022 |
| 1 | -4.080093 | 0.227123  | 4.520209  | 1        | 0.430709  | 2.148730  | 0.000056  |
| 6 | 1.289711  | -0.191130 | 0.534817  | 6        | -2.211525 | 0.000036  | -0.000048 |
| 6 | 0.067950  | -0.189818 | 0.610030  | 1        | -2.052123 | -2.150811 | -0.000044 |
| 6 | 3.944841  | -0.970421 | 1.773379  | 1        | -2.052020 | 2.150877  | -0.000038 |
| 1 | 3.918901  | -0.237544 | 2.594524  | 1        | -3.297711 | 0.000062  | -0.000089 |
| 6 | 3.498535  | 1.755007  | 0.251968  | 1        | 4.297287  | 0.000078  | -0.000343 |
| 1 | 2.998659  | 2.130833  | 1.158628  |          |           |           |           |
| 6 | 3.491973  | -1.049838 | -1.338332 | <b>3</b> |           |           |           |
| 1 | 3.564532  | -2.106853 | -1.037153 | 6        | -1.939579 | -0.002790 | 0.530332  |
| 6 | 2.849564  | 2.457484  | -0.953883 | 6        | -3.281651 | -0.081395 | -0.107833 |
| 1 | 2.960821  | 3.547493  | -0.877099 | 6        | -3.489249 | 0.393030  | -1.414563 |
| 1 | 3.320011  | 2.149970  | -1.895156 | 6        | -4.381782 | -0.624947 | 0.577134  |
| 1 | 1.779794  | 2.233584  | -1.028767 | 6        | -4.740316 | 0.309810  | -2.020066 |
| 6 | 4.989918  | 2.111981  | 0.369255  | 1        | -2.663634 | 0.854526  | -1.947396 |
| 1 | 5.125192  | 3.201737  | 0.392139  | 6        | -5.633347 | -0.716401 | -0.030546 |
| 1 | 5.435878  | 1.707486  | 1.284252  | 1        | -4.255636 | -0.999509 | 1.587858  |
| 1 | 5.567906  | 1.731607  | -0.480150 | 6        | -5.819244 | -0.249664 | -1.332031 |
| 6 | 5.415313  | -1.345369 | 1.514159  | 1        | -4.876192 | 0.692301  | -3.027994 |
| 1 | 5.868943  | -1.777519 | 2.415943  | 1        | -6.464743 | -1.153694 | 0.515568  |
| 1 | 5.494614  | -2.098902 | 0.721379  | 1        | -6.795996 | -0.313480 | -1.803071 |
| 1 | 6.025589  | -0.486286 | 1.217028  | 6        | -0.809987 | -0.124318 | -0.202720 |
| 6 | 3.154146  | -2.212754 | 2.221290  | 1        | -0.926630 | -0.306357 | -1.271402 |
| 1 | 3.627359  | -2.682758 | 3.093867  | 6        | -0.652390 | 0.780976  | 2.649505  |

|    |           |           |           |    |           |           |           |
|----|-----------|-----------|-----------|----|-----------|-----------|-----------|
| 6  | -1.933301 | 0.192366  | 2.041280  | 8  | -0.076718 | 0.381543  | 2.623166  |
| 6  | 0.600404  | -0.074236 | 2.382603  | 1  | 0.092687  | -0.490364 | 3.006807  |
| 1  | -0.500123 | 1.792971  | 2.249560  | 1  | -2.646285 | -0.246744 | 2.076746  |
| 1  | -0.811424 | 0.898780  | 3.729436  | 6  | 1.501370  | -0.478784 | 0.294000  |
| 1  | -2.780457 | 0.834518  | 2.311222  | 6  | 2.755102  | 0.154420  | 0.213535  |
| 1  | -2.136724 | -0.778360 | 2.520813  | 6  | 1.421572  | -1.826924 | -0.098083 |
| 1  | 1.466454  | 0.328936  | 2.920687  | 6  | 3.883675  | -0.528221 | -0.239856 |
| 1  | 0.437291  | -1.093230 | 2.759481  | 1  | 2.851739  | 1.196887  | 0.507372  |
| 14 | 0.906741  | -0.083617 | 0.520533  | 6  | 2.547335  | -2.517145 | -0.549804 |
| 6  | 1.771893  | 1.502883  | -0.005623 | 1  | 0.463652  | -2.339416 | -0.061481 |
| 6  | 3.168164  | 1.643161  | 0.090757  | 6  | 3.780547  | -1.867423 | -0.622177 |
| 6  | 1.029765  | 2.610825  | -0.449323 | 1  | 4.841446  | -0.017979 | -0.297449 |
| 6  | 3.798722  | 2.842216  | -0.241440 | 1  | 2.462277  | -3.558399 | -0.849250 |
| 1  | 3.771887  | 0.800302  | 0.419291  | 1  | 4.657852  | -2.401305 | -0.977406 |
| 6  | 1.654410  | 3.813936  | -0.782819 | 6  | 0.118781  | 2.274864  | 0.531821  |
| 1  | -0.050810 | 2.526764  | -0.536302 | 1  | -0.741901 | 2.779416  | 0.992612  |
| 6  | 3.041160  | 3.931043  | -0.679128 | 1  | 1.008428  | 2.694887  | 1.022566  |
| 1  | 4.879257  | 2.928078  | -0.161617 | 6  | 0.156609  | 2.574462  | -0.976686 |
| 1  | 1.060941  | 4.657577  | -1.125498 | 1  | -0.739368 | 2.155925  | -1.453551 |
| 6  | 1.923308  | -1.559828 | -0.048055 | 1  | 1.012441  | 2.057975  | -1.431863 |
| 6  | 1.883578  | -2.781552 | 0.646370  | 6  | 0.243868  | 4.072032  | -1.283928 |
| 6  | 2.711093  | -1.493588 | -1.211356 | 1  | 0.268810  | 4.261098  | -2.363574 |
| 6  | 2.600247  | -3.892546 | 0.200950  | 1  | -0.618189 | 4.607625  | -0.868227 |
| 1  | 1.284422  | -2.870411 | 1.549140  | 1  | 1.148380  | 4.510633  | -0.844812 |
| 6  | 3.429306  | -2.601218 | -1.663338 |    |           |           |           |
| 1  | 2.772204  | -0.560501 | -1.765409 | 7  |           |           |           |
| 6  | 3.375540  | -3.803725 | -0.956573 | 17 | 0.152998  | -1.568941 | 2.091935  |
| 1  | 2.555899  | -4.825680 | 0.756347  | 6  | 1.725907  | -2.669542 | -0.817120 |
| 1  | 4.032517  | -2.525620 | -2.564246 | 6  | 2.836317  | -2.360173 | -1.490170 |
| 1  | 3.935992  | -4.667067 | -1.305060 | 6  | 0.372411  | -2.070238 | -1.065501 |
| 1  | 3.530682  | 4.865578  | -0.939955 | 1  | 1.784636  | -3.372402 | 0.012810  |
| 6  |           |           |           | 1  | 2.826256  | -1.650406 | -2.314480 |
|    |           |           |           | 1  | 3.795573  | -2.803525 | -1.239060 |
|    |           |           |           | 1  | -0.411077 | -2.837428 | -1.012007 |
|    |           |           |           | 1  | 0.326037  | -1.616656 | -2.064443 |
|    |           |           |           | 14 | -0.030347 | -0.705146 | 0.182573  |
|    |           |           |           | 6  | -1.776898 | -0.078915 | -0.027287 |
|    |           |           |           | 6  | -2.247146 | 0.986483  | 0.762493  |
|    |           |           |           | 6  | -2.649483 | -0.638152 | -0.975132 |
|    |           |           |           | 6  | -3.543945 | 1.473686  | 0.611150  |
|    |           |           |           | 1  | -1.590918 | 1.439705  | 1.501277  |
|    |           |           |           | 6  | -3.948688 | -0.151957 | -1.131315 |
|    |           |           |           | 1  | -2.317042 | -1.462135 | -1.600817 |
|    |           |           |           | 6  | -4.396848 | 0.904133  | -0.337653 |
| 6  |           |           |           |    |           |           |           |
| 6  | -1.546950 | -0.322667 | 0.223791  |    |           |           |           |
| 6  | -2.687258 | -0.511349 | 1.023149  |    |           |           |           |
| 6  | -3.865815 | -1.034129 | 0.488460  |    |           |           |           |
| 6  | -3.926564 | -1.376006 | -0.863556 |    |           |           |           |
| 6  | -2.805475 | -1.195926 | -1.676638 |    |           |           |           |
| 6  | -1.629395 | -0.675964 | -1.135606 |    |           |           |           |
| 1  | -4.735741 | -1.174718 | 1.124650  |    |           |           |           |
| 1  | -4.843130 | -1.782891 | -1.282255 |    |           |           |           |
| 1  | -2.847554 | -1.463659 | -2.729108 |    |           |           |           |
| 1  | -0.759882 | -0.554053 | -1.777125 |    |           |           |           |
| 14 | 0.003833  | 0.447522  | 0.946392  |    |           |           |           |

|   |           |           |           |    |           |           |           |
|---|-----------|-----------|-----------|----|-----------|-----------|-----------|
| 1 | -3.890557 | 2.295952  | 1.230916  | 1  | -6.789889 | 1.605094  | 1.241074  |
| 1 | -4.609287 | -0.597216 | -1.870082 | 1  | -7.811708 | 2.448498  | 3.314709  |
| 1 | -5.407985 | 1.283427  | -0.457061 | 6  | -3.829943 | -1.236644 | 1.121631  |
| 6 | 1.193011  | 0.700049  | 0.075052  | 6  | -3.486238 | -1.775417 | 2.390687  |
| 6 | 2.503548  | 0.571084  | 0.569164  | 1  | -4.216162 | 2.243635  | -2.854467 |
| 6 | 0.840602  | 1.895631  | -0.575323 | 1  | -2.718728 | -2.536902 | 2.452228  |
| 6 | 3.429037  | 1.602351  | 0.418485  | 15 | -2.771941 | 1.620350  | -0.433932 |
| 1 | 2.798643  | -0.340022 | 1.079937  | 15 | -2.743611 | -1.604939 | -0.343875 |
| 6 | 1.766158  | 2.929019  | -0.728512 | 6  | -2.872172 | 1.993235  | 1.374727  |
| 1 | -0.168084 | 2.024877  | -0.957843 | 6  | -3.716131 | 2.965394  | 1.926128  |
| 6 | 3.061659  | 2.782840  | -0.231642 | 6  | -2.012172 | 1.282602  | 2.223273  |
| 1 | 4.436229  | 1.487217  | 0.809427  | 6  | -3.703623 | 3.217906  | 3.296918  |
| 1 | 1.474624  | 3.847568  | -1.230452 | 1  | -4.395539 | 3.522096  | 1.291694  |
| 1 | 3.782997  | 3.587291  | -0.347178 | 6  | -1.995346 | 1.537220  | 3.593526  |

### CAT1

|    |           |           |           |   |           |           |           |
|----|-----------|-----------|-----------|---|-----------|-----------|-----------|
| 45 | -1.296887 | 0.018634  | -0.920755 | 1 | -1.366980 | 0.527194  | 1.781104  |
| 1  | 0.005192  | 1.111313  | -1.456424 | 6 | -2.842383 | 2.505793  | 4.134399  |
| 6  | -8.523328 | -1.545999 | -0.742513 | 1 | -4.377489 | 3.960830  | 3.713457  |
| 6  | -7.363021 | -1.087681 | -0.159549 | 1 | -1.326597 | 0.972892  | 4.238018  |
| 6  | -6.499762 | -0.193105 | -0.848808 | 1 | -2.837369 | 2.702120  | 5.202873  |
| 6  | -6.868429 | 0.219233  | -2.167972 | 6 | -2.543683 | 3.304990  | -1.155177 |
| 6  | -8.064155 | -0.278247 | -2.745294 | 6 | -1.291182 | 3.669721  | -1.662233 |
| 6  | -8.879115 | -1.142455 | -2.049971 | 6 | -3.579434 | 4.254820  | -1.161210 |
| 1  | -9.168313 | -2.227938 | -0.195376 | 6 | -1.070660 | 4.960337  | -2.146018 |
| 1  | -7.095051 | -1.412347 | 0.838652  | 1 | -0.491507 | 2.939110  | -1.672014 |
| 6  | -5.269713 | 0.277550  | -0.280128 | 6 | -3.359062 | 5.542358  | -1.645790 |
| 6  | -6.013355 | 1.104455  | -2.871511 | 1 | -4.570592 | 3.980537  | -0.814153 |
| 1  | -8.324086 | 0.038363  | -3.752278 | 6 | -2.099831 | 5.900291  | -2.134911 |
| 1  | -9.793634 | -1.515959 | -2.501916 | 1 | -0.087566 | 5.225939  | -2.522213 |
| 6  | -4.860809 | 1.573825  | -2.296619 | 1 | -4.171738 | 6.263947  | -1.647831 |
| 6  | -4.477231 | 1.179330  | -0.982965 | 1 | -1.928093 | 6.905097  | -2.511591 |
| 1  | -6.283034 | 1.403443  | -3.881324 | 6 | -3.926211 | -2.174300 | -1.623479 |
| 6  | -6.649980 | 1.160735  | 4.617273  | 6 | -5.014757 | -3.008012 | -1.331204 |
| 6  | -5.688608 | 0.178778  | 4.682288  | 6 | -3.734409 | -1.727748 | -2.937179 |
| 6  | -5.085661 | -0.328907 | 3.502484  | 6 | -5.895654 | -3.393781 | -2.338864 |
| 6  | -5.482624 | 0.192867  | 2.231189  | 1 | -5.187911 | -3.328863 | -0.308038 |
| 6  | -6.484542 | 1.201328  | 2.199470  | 6 | -4.620401 | -2.111703 | -3.944498 |
| 6  | -7.052022 | 1.673218  | 3.360941  | 1 | -2.900247 | -1.061336 | -3.143238 |
| 1  | -3.803517 | -1.752653 | 4.504242  | 6 | -5.701025 | -2.942902 | -3.646604 |
| 1  | -7.102898 | 1.544331  | 5.527147  | 1 | -6.749088 | -4.020938 | -2.099628 |
| 1  | -5.371013 | -0.222889 | 5.641275  | 1 | -4.473818 | -1.749191 | -4.958212 |
| 6  | -4.091708 | -1.335859 | 3.542240  | 1 | -6.398763 | -3.230810 | -4.427974 |
| 6  | -4.839173 | -0.275665 | 1.042356  | 6 | -1.854381 | -3.134480 | 0.176717  |
|    |           |           |           | 6 | -0.724555 | -2.973121 | 0.995569  |
|    |           |           |           | 6 | -2.227860 | -4.426333 | -0.212335 |

|    |           |           |           |   |           |           |           |
|----|-----------|-----------|-----------|---|-----------|-----------|-----------|
| 6  | -0.005627 | -4.076814 | 1.447832  | 6 | 2.871962  | -1.993023 | 1.374702  |
| 1  | -0.396652 | -1.970860 | 1.247768  | 6 | 3.715939  | -2.965097 | 1.926215  |
| 6  | -1.493354 | -5.532583 | 0.223536  | 6 | 2.011891  | -1.282360 | 2.223151  |
| 1  | -3.083157 | -4.573081 | -0.862200 | 6 | 3.703363  | -3.217524 | 3.297024  |
| 6  | -0.390194 | -5.362139 | 1.059427  | 1 | 4.395423  | -3.521806 | 1.291864  |
| 1  | 0.866566  | -3.928341 | 2.075730  | 6 | 1.994986  | -1.536899 | 3.593417  |
| 1  | -1.785951 | -6.529206 | -0.096240 | 1 | 1.366694  | -0.527010 | 1.780891  |
| 1  | 0.182167  | -6.224248 | 1.389786  | 6 | 2.842031  | -2.505405 | 4.134406  |
| 45 | 1.296848  | -0.018627 | -0.921016 | 1 | 4.377237  | -3.960397 | 3.713640  |
| 1  | -0.005414 | -1.111537 | -1.456007 | 1 | 1.326176  | -0.972552 | 4.237826  |
| 6  | 8.523463  | 1.545726  | -0.742099 | 1 | 2.836938  | -2.701680 | 5.202889  |
| 6  | 7.363044  | 1.087531  | -0.159258 | 6 | 2.543733  | -3.305023 | -1.155059 |
| 6  | 6.499791  | 0.193024  | -0.848598 | 6 | 1.291230  | -3.669949 | -1.661968 |
| 6  | 6.868592  | -0.219413 | -2.167692 | 6 | 3.579592  | -4.254730 | -1.161053 |
| 6  | 8.064423  | 0.277949  | -2.744894 | 6 | 1.070820  | -4.960657 | -2.145561 |
| 6  | 8.879373  | 1.142114  | -2.049501 | 1 | 0.491474  | -2.939425 | -1.671789 |
| 1  | 9.168443  | 2.227617  | -0.194897 | 6 | 3.359321  | -5.542365 | -1.645425 |
| 1  | 7.094988  | 1.412251  | 0.838904  | 1 | 4.570757  | -3.980294 | -0.814125 |
| 6  | 5.269649  | -0.277540 | -0.280042 | 6 | 2.100091  | -5.900505 | -2.134392 |
| 6  | 6.013558  | -1.104646 | -2.871276 | 1 | 0.087732  | -5.226421 | -2.521652 |
| 1  | 8.324447  | -0.038728 | -3.751833 | 1 | 4.172077  | -6.263864 | -1.647420 |
| 1  | 9.793979  | 1.515524  | -2.501346 | 1 | 1.928420  | -6.905385 | -2.510905 |
| 6  | 4.860943  | -1.573953 | -2.296476 | 6 | 3.926369  | 2.174179  | -1.623574 |
| 6  | 4.477243  | -1.179353 | -0.982882 | 6 | 5.014943  | 3.007834  | -1.331212 |
| 1  | 6.283341  | -1.403711 | -3.881039 | 6 | 3.734710  | 1.727556  | -2.937267 |
| 6  | 6.649788  | -1.160400 | 4.617418  | 6 | 5.895987  | 3.393483  | -2.338782 |
| 6  | 5.688392  | -0.178466 | 4.682356  | 1 | 5.188005  | 3.328706  | -0.308036 |
| 6  | 5.085465  | 0.329140  | 3.502506  | 6 | 4.620851  | 2.111399  | -3.944504 |
| 6  | 5.482477  | -0.192701 | 2.231254  | 1 | 2.900520  | 1.061200  | -3.143394 |
| 6  | 6.484448  | -1.201115 | 2.199610  | 6 | 5.701488  | 2.942543  | -3.646523 |
| 6  | 7.051899  | -1.672931 | 3.361121  | 1 | 6.749432  | 4.020602  | -2.099486 |
| 1  | 3.803269  | 1.752944  | 4.504118  | 1 | 4.474368  | 1.748832  | -4.958211 |
| 1  | 7.102683  | -1.543944 | 5.527327  | 1 | 6.399342  | 3.230370  | -4.427821 |
| 1  | 5.370764  | 0.223243  | 5.641315  | 6 | 1.854291  | 3.134449  | 0.176345  |
| 6  | 4.091491  | 1.336070  | 3.542160  | 6 | 0.724423  | 2.973145  | 0.995167  |
| 6  | 4.839042  | 0.275726  | 1.042386  | 6 | 2.227809  | 4.426269  | -0.212751 |
| 1  | 6.789847  | -1.604896 | 1.241236  | 6 | 0.005546  | 4.076889  | 1.447384  |
| 1  | 7.811619  | -2.448181 | 3.314960  | 1 | 0.396453  | 1.970895  | 1.247346  |
| 6  | 3.829790  | 1.236686  | 1.121545  | 6 | 1.493329  | 5.532569  | 0.223051  |
| 6  | 3.486048  | 1.775542  | 2.390554  | 1 | 3.083106  | 4.572961  | -0.862630 |
| 1  | 4.216351  | -2.243814 | -2.854329 | 6 | 0.390171  | 5.362192  | 1.058951  |
| 1  | 2.718538  | 2.537027  | 2.452034  | 1 | -0.866664 | 3.928483  | 2.075273  |
| 15 | 2.771896  | -1.620303 | -0.434002 | 1 | 1.785958  | 6.529164  | -0.096776 |
| 15 | 2.743601  | 1.604894  | -0.344087 | 1 | -0.182149 | 6.224330  | 1.389306  |



|             |           |           |           |    |           |           |           |
|-------------|-----------|-----------|-----------|----|-----------|-----------|-----------|
|             |           |           |           | 1  | 1.664006  | 2.899069  | 1.806619  |
|             |           |           |           | 6  | 4.168515  | 5.019223  | 0.913070  |
| <b>CAT2</b> |           |           |           | 1  | 5.543827  | 4.683356  | -0.712202 |
| 45          | 0.055601  | 0.671774  | -0.186708 | 1  | 2.656207  | 5.073421  | 2.452417  |
| 15          | -2.282887 | 0.934755  | 0.008151  | 1  | 4.597617  | 5.979243  | 1.186388  |
| 15          | 2.353078  | 0.876800  | -0.124277 | 1  | 3.267320  | -0.004345 | 1.207233  |
| 6           | -3.503819 | -0.452603 | 0.126409  | 6  | 2.560107  | -0.278553 | 2.383954  |
| 6           | -3.642985 | -1.180916 | 1.317433  | 6  | 4.637641  | -0.291234 | 1.156702  |
| 6           | -4.290278 | -0.816415 | -0.974981 | 6  | 3.189371  | -0.884683 | 3.470918  |
| 6           | -4.537228 | -2.245985 | 1.404962  | 6  | 1.506564  | -0.030885 | 2.429540  |
| 1           | -3.066711 | -0.906414 | 2.190275  | 1  | 5.265163  | -0.912879 | 2.235570  |
| 6           | -5.187630 | -1.879969 | -0.885896 | 6  | 5.216382  | -0.029923 | 0.277442  |
| 1           | -4.202073 | -0.270810 | -1.906507 | 1  | 4.541572  | -1.221109 | 3.391014  |
| 6           | -5.315794 | -2.599190 | 0.302131  | 6  | 2.617485  | -1.105611 | 4.367944  |
| 1           | -4.625854 | -2.793434 | 2.339395  | 1  | 6.324035  | -1.149760 | 2.178076  |
| 1           | -5.783594 | -2.148255 | -1.753461 | 1  | 5.035010  | -1.706018 | 4.228753  |
| 1           | -6.016217 | -3.427287 | 0.368135  | 1  | 3.081649  | 0.409316  | -1.737581 |
| 6           | -3.049926 | 1.916494  | -1.346287 | 6  | 2.701001  | 1.206362  | -2.834708 |
| 6           | -4.201088 | 2.687408  | -1.152386 | 6  | 3.872681  | -0.722025 | -1.956960 |
| 6           | -2.505760 | 1.810180  | -2.632637 | 6  | 3.139662  | 0.888840  | -4.116970 |
| 6           | -4.805418 | 3.334411  | -2.230892 | 6  | 2.054301  | 2.064370  | -2.671204 |
| 1           | -4.623850 | 2.793022  | -0.159164 | 1  | 4.305709  | -1.037691 | -3.247459 |
| 6           | -3.118239 | 2.444501  | -3.711989 | 6  | 4.133682  | -1.377812 | -1.136278 |
| 1           | -1.587064 | 1.252923  | -2.773401 | 1  | 3.948349  | -0.233505 | -4.327232 |
| 6           | -4.270016 | 3.208469  | -3.513490 | 6  | 2.846189  | 1.515267  | -4.954867 |
| 1           | -5.694193 | 3.937730  | -2.067275 | 1  | 4.914091  | -1.924392 | -3.401093 |
| 1           | -2.683990 | 2.358904  | -4.704301 | 1  | 4.288239  | -0.480851 | -5.329235 |
| 1           | -4.742062 | 3.711767  | -4.352837 | 1  | 0.032959  | 2.991511  | -0.888458 |
| 6           | -2.657857 | 1.867525  | 1.556229  | 17 | 0.012902  | -1.562500 | 0.057459  |
| 6           | -3.925752 | 1.846372  | 2.158805  | 15 | -1.213054 | -2.297867 | -1.112027 |
| 6           | -1.636267 | 2.618681  | 2.156704  | 6  | -1.998612 | -3.422110 | -0.844442 |
| 6           | -4.164411 | 2.557524  | 3.334964  | 6  | -1.283331 | -1.704431 | -2.382439 |
| 1           | -4.724957 | 1.259794  | 1.719032  | 6  | -2.827615 | -3.951596 | -1.833897 |
| 6           | -1.876987 | 3.327554  | 3.333772  | 6  | -1.993192 | -3.870939 | 0.141102  |
| 1           | -0.662801 | 2.652920  | 1.682227  | 1  | -2.105360 | -2.239099 | -3.372739 |
| 6           | -3.139722 | 3.297645  | 3.927462  | 6  | -0.687409 | -0.816685 | -2.577493 |
| 1           | -5.151206 | 2.529730  | 3.789039  | 1  | -2.876914 | -3.370293 | -3.101037 |
| 1           | -1.075228 | 3.906744  | 3.783727  | 6  | -3.447609 | -4.814015 | -1.606316 |
| 1           | -3.325667 | 3.848217  | 4.845616  | 1  | -2.148286 | -1.767227 | -4.350502 |
| 6           | 3.051090  | 2.551300  | 0.197365  | 1  | -3.524790 | -3.786688 | -3.867386 |
| 6           | 4.145762  | 3.059785  | -0.507013 | 1  | 1.474040  | -2.630358 | -0.371774 |
| 6           | 2.523497  | 3.285368  | 1.268274  | 6  | 1.676631  | -3.061948 | -1.690640 |
| 6           | 4.698072  | 4.293252  | -0.152367 | 6  | 2.404832  | -3.015552 | 0.605188  |
| 1           | 4.565929  | 2.501860  | -1.336890 | 6  | 2.770085  | -3.861869 | -2.020806 |
| 6           | 3.080131  | 4.509041  | 1.626465  |    |           |           |           |

|   |           |           |           |   |           |          |           |
|---|-----------|-----------|-----------|---|-----------|----------|-----------|
| 1 | 0.976223  | -2.782050 | -2.467979 | 1 | -3.480053 | 4.511501 | 0.313299  |
| 6 | 3.507415  | -3.801509 | 0.272123  | 6 | -3.927462 | 2.347849 | 3.499440  |
| 1 | 2.271886  | -2.709175 | 1.633653  | 1 | -3.290790 | 0.697940 | 2.275788  |
| 6 | 3.693177  | -4.231997 | -1.042824 | 6 | -4.169774 | 3.722972 | 3.550375  |
| 1 | 2.902200  | -4.185808 | -3.049125 | 1 | -4.192044 | 5.568444 | 2.433809  |
| 1 | 4.217340  | -4.075735 | 1.047057  | 1 | -4.055565 | 1.732777 | 4.385780  |
| 1 | 4.547371  | -4.851832 | -1.301232 | 1 | -4.482668 | 4.188637 | 4.481047  |
| 6 | -0.399993 | -2.217889 | 1.730890  | 6 | -2.135986 | 3.049187 | -1.406669 |
| 6 | -0.367792 | -3.582947 | 2.053107  | 6 | -1.047875 | 3.785382 | -0.910451 |
| 6 | -0.711338 | -1.294748 | 2.737877  | 6 | -2.614145 | 3.326726 | -2.692103 |
| 6 | -0.672313 | -4.013228 | 3.344532  | 6 | -0.447405 | 4.771402 | -1.686623 |
| 1 | -0.081658 | -4.309708 | 1.299817  | 1 | -0.661544 | 3.573382 | 0.077358  |
| 6 | -1.006357 | -1.721381 | 4.032922  | 6 | -2.003365 | 4.311455 | -3.474514 |
| 1 | -0.723491 | -0.236928 | 2.488802  | 1 | -3.457413 | 2.771962 | -3.089393 |
| 6 | -0.994212 | -3.083836 | 4.336683  | 6 | -0.918882 | 5.033022 | -2.976765 |
| 1 | -0.648205 | -5.073826 | 3.578957  | 1 | 0.400281  | 5.319686 | -1.287649 |
| 1 | -1.247717 | -0.989708 | 4.798996  | 1 | -2.380415 | 4.512118 | -4.473926 |
| 1 | -1.223914 | -3.420848 | 5.343700  | 1 | -0.441918 | 5.794682 | -3.587657 |

**CAT3**

|    |           |           |           |   |           |           |           |
|----|-----------|-----------|-----------|---|-----------|-----------|-----------|
| 45 | -1.301945 | 0.004184  | -0.268682 | 6 | -3.169285 | -2.788978 | -1.096200 |
| 1  | -0.001566 | 1.142452  | -0.692340 | 6 | -4.335256 | -3.565315 | -1.076259 |
| 6  | -6.774812 | 1.324456  | -1.502780 | 6 | -2.354490 | -2.806609 | -2.239767 |
| 6  | -6.705992 | 0.343131  | -2.494480 | 6 | -4.689104 | -4.335047 | -2.186359 |
| 6  | -5.611047 | 1.773246  | -0.874977 | 1 | -4.973156 | -3.562196 | -0.198489 |
| 6  | -5.465615 | -0.179764 | -2.871723 | 6 | -2.702539 | -3.586735 | -3.341125 |
| 6  | -4.304246 | 0.267617  | -2.244088 | 1 | -1.452267 | -2.201873 | -2.252348 |
| 6  | -4.368352 | 1.238544  | -1.232391 | 6 | -3.874781 | -4.346985 | -3.320227 |
| 1  | -5.401581 | -0.952837 | -3.632092 | 1 | -5.600858 | -4.926055 | -2.163299 |
| 6  | -6.264610 | -0.950815 | 3.056281  | 1 | -2.055262 | -3.600217 | -4.213438 |
| 6  | -6.385276 | -0.811067 | 1.672801  | 1 | -4.151442 | -4.947565 | -4.182639 |
| 1  | -4.966911 | -1.547165 | 4.673396  | 6 | -1.576308 | -2.915654 | 1.295360  |
| 6  | -5.067000 | -1.420208 | 3.598668  | 6 | -0.525196 | -2.398116 | 2.068124  |
| 6  | -5.312930 | -1.120083 | 0.837547  | 6 | -1.790967 | -4.299401 | 1.273500  |
| 6  | -4.096931 | -1.571650 | 1.373952  | 6 | 0.300577  | -3.251336 | 2.800509  |
| 6  | -3.992271 | -1.730716 | 2.764857  | 1 | -0.326733 | -1.329852 | 2.038770  |
| 1  | -3.339955 | -0.160676 | -2.499828 | 6 | -0.955367 | -5.153733 | 1.996212  |
| 1  | -3.063442 | -2.087374 | 3.197340  | 1 | -2.595156 | -4.712761 | 0.673040  |
| 15 | -2.793434 | 1.665173  | -0.382176 | 6 | 0.092380  | -4.631601 | 2.757650  |
| 15 | -2.603242 | -1.739554 | 0.307317  | 1 | 1.129717  | -2.844104 | 3.368933  |
| 6  | -3.351684 | 2.526111  | 1.147149  | 1 | -1.117675 | -6.227504 | 1.955117  |
| 6  | -3.608319 | 3.902583  | 1.202056  | 1 | 0.757085  | -5.295310 | 3.302931  |
| 6  | -3.508515 | 1.757489  | 2.308445  | 1 | -7.098699 | -0.701510 | 3.706221  |
| 6  | -4.007075 | 4.498057  | 2.400205  | 1 | -7.312029 | -0.451251 | 1.235322  |
|    |           |           |           | 1 | -7.737651 | 1.733880  | -1.208699 |
|    |           |           |           | 1 | -7.615407 | -0.015108 | -2.969134 |

|    |           |           |           |            |           |           |           |
|----|-----------|-----------|-----------|------------|-----------|-----------|-----------|
| 1  | -5.424153 | -1.005349 | -0.232814 | 6          | 3.168970  | 2.789010  | -1.096401 |
| 1  | -5.672738 | 2.517467  | -0.087781 | 6          | 4.334951  | 3.565334  | -1.076592 |
| 45 | 1.301893  | -0.004240 | -0.268690 | 6          | 2.354071  | 2.806622  | -2.239895 |
| 1  | 0.001416  | -1.142612 | -0.692221 | 6          | 4.688713  | 4.335025  | -2.186749 |
| 6  | 6.775023  | -1.324348 | -1.502087 | 1          | 4.972923  | 3.562257  | -0.198876 |
| 6  | 6.706273  | -0.343202 | -2.493969 | 6          | 2.702033  | 3.586711  | -3.341307 |
| 6  | 5.611200  | -1.773086 | -0.874353 | 1          | 1.451835  | 2.201911  | -2.252390 |
| 6  | 5.465914  | 0.179554  | -2.871466 | 6          | 3.874289  | 4.346940  | -3.320543 |
| 6  | 4.304486  | -0.267778 | -2.243903 | 1          | 5.600479  | 4.926017  | -2.163788 |
| 6  | 4.368524  | -1.238511 | -1.232023 | 1          | 2.054660  | 3.600187  | -4.213546 |
| 1  | 5.401938  | 0.952479  | -3.631989 | 1          | 4.150883  | 4.947489  | -4.182999 |
| 6  | 6.264356  | 0.951368  | 3.056349  | 6          | 1.576069  | 2.915786  | 1.295189  |
| 6  | 6.385127  | 0.811652  | 1.672876  | 6          | 0.524943  | 2.398324  | 2.067972  |
| 1  | 4.966452  | 1.547490  | 4.673386  | 6          | 1.790904  | 4.299509  | 1.273419  |
| 6  | 5.066638  | 1.420567  | 3.598663  | 6          | -0.300661 | 3.251595  | 2.800500  |
| 6  | 5.312789  | 1.120515  | 0.837555  | 1          | 0.326349  | 1.330085  | 2.038557  |
| 6  | 4.096685  | 1.571896  | 1.373879  | 6          | 0.955474  | 5.153892  | 1.996262  |
| 6  | 3.991917  | 1.730920  | 2.764784  | 1          | 2.595107  | 4.712807  | 0.672937  |
| 1  | 3.340201  | 0.160392  | -2.499870 | 6          | -0.092280 | 4.631833  | 2.757749  |
| 1  | 3.063010  | 2.087426  | 3.197220  | 1          | -1.129803 | 2.844422  | 3.368960  |
| 15 | 2.793520  | -1.665162 | -0.381993 | 1          | 1.117921  | 6.227646  | 1.955249  |
| 15 | 2.603002  | 1.739637  | 0.307197  | 1          | -0.756837 | 5.295587  | 3.303159  |
| 6  | 3.351651  | -2.526115 | 1.147369  | 1          | 7.098446  | 0.702184  | 3.706336  |
| 6  | 3.607822  | -3.902670 | 1.202360  | 1          | 7.311963  | 0.451980  | 1.235455  |
| 6  | 3.508816  | -1.757454 | 2.308598  | 1          | 7.737845  | -1.733677 | -1.207816 |
| 6  | 4.006451  | -4.498189 | 2.400531  | 1          | 7.615727  | 0.015003  | -2.968574 |
| 1  | 3.479306  | -4.511603 | 0.313654  | 1          | 5.424096  | 1.005793  | -0.232798 |
| 6  | 3.927608  | -2.347875 | 3.499615  | 1          | 5.672823  | -2.517183 | -0.087034 |
| 1  | 3.291466  | -0.697829 | 2.275881  |            |           |           |           |
| 6  | 4.169459  | -3.723077 | 3.550636  | <b>CAT</b> |           |           |           |
| 1  | 4.191067  | -5.568635 | 2.434204  | 45         | 1.518321  | -0.106271 | -1.112850 |
| 1  | 4.055962  | -1.732791 | 4.385911  | 6          | 8.576347  | 1.706980  | -0.767752 |
| 1  | 4.482239  | -4.188777 | 4.481330  | 6          | 7.445875  | 1.209079  | -0.157786 |
| 6  | 2.136319  | -3.049282 | -1.406550 | 6          | 6.575284  | 0.320359  | -0.843387 |
| 6  | 1.047314  | -3.784593 | -0.910977 | 6          | 6.898239  | -0.039208 | -2.189046 |
| 6  | 2.615807  | -3.328067 | -2.691214 | 6          | 8.061305  | 0.499325  | -2.793724 |
| 6  | 0.447283  | -4.770978 | -1.687021 | 6          | 8.888769  | 1.353599  | -2.099669 |
| 1  | 0.659964  | -3.571627 | 0.076223  | 1          | 9.229595  | 2.382351  | -0.222303 |
| 6  | 2.005455  | -4.313146 | -3.473532 | 1          | 7.210303  | 1.497313  | 0.859616  |
| 1  | 3.459782  | -2.774016 | -3.087992 | 6          | 5.378086  | -0.200245 | -0.244717 |
| 6  | 0.920094  | -5.033833 | -2.976428 | 6          | 6.028260  | -0.913123 | -2.892183 |
| 1  | -0.401074 | -5.318585 | -1.288540 | 1          | 8.286886  | 0.223130  | -3.820623 |
| 1  | 2.383534  | -4.514769 | -4.472361 | 1          | 9.778872  | 1.758285  | -2.572916 |
| 1  | 0.443490  | -5.795772 | -3.587256 | 6          | 4.912609  | -1.430036 | -2.289169 |

|    |          |           |           |    |           |           |           |
|----|----------|-----------|-----------|----|-----------|-----------|-----------|
| 6  | 4.583426 | -1.098166 | -0.941564 | 6  | 4.992469  | 3.124629  | -1.163700 |
| 1  | 6.257591 | -1.163064 | -3.924864 | 6  | 3.790389  | 1.902524  | -2.872658 |
| 6  | 6.854067 | -1.029558 | 4.638286  | 6  | 5.870036  | 3.613794  | -2.128228 |
| 6  | 5.883743 | -0.056830 | 4.710512  | 1  | 5.138141  | 3.383781  | -0.119115 |
| 6  | 5.251310 | 0.427115  | 3.536270  | 6  | 4.672703  | 2.391900  | -3.836251 |
| 6  | 5.634088 | -0.104490 | 2.265097  | 1  | 2.988258  | 1.222541  | -3.143363 |
| 6  | 6.648876 | -1.099114 | 2.224254  | 6  | 5.713607  | 3.244001  | -3.466013 |
| 6  | 7.240107 | -1.553021 | 3.380977  | 1  | 6.691398  | 4.259612  | -1.832922 |
| 1  | 3.965239 | 1.846186  | 4.539241  | 1  | 4.552415  | 2.095002  | -4.874306 |
| 1  | 7.327202 | -1.398120 | 5.544050  | 1  | 6.409038  | 3.612715  | -4.214756 |
| 1  | 5.579138 | 0.351622  | 5.670755  | 6  | 1.804410  | 2.989141  | 0.314427  |
| 6  | 4.237569 | 1.413379  | 3.579804  | 6  | 0.713796  | 2.720286  | 1.157051  |
| 6  | 4.954996 | 0.329739  | 1.085370  | 6  | 2.129174  | 4.319797  | 0.028708  |
| 1  | 6.941341 | -1.507691 | 1.263598  | 6  | 0.000073  | 3.760242  | 1.749600  |
| 1  | 8.006839 | -2.320964 | 3.331107  | 1  | 0.420921  | 1.690485  | 1.330288  |
| 6  | 3.903600 | 1.242363  | 1.172303  | 6  | 1.397060  | 5.362187  | 0.603047  |
| 6  | 3.582323 | 1.803740  | 2.437623  | 1  | 2.950855  | 4.545885  | -0.641051 |
| 1  | 4.253988 | -2.088188 | -2.845381 | 6  | 0.344740  | 5.085710  | 1.475150  |
| 1  | 2.793268 | 2.540446  | 2.508609  | 1  | -0.836314 | 3.536210  | 2.401724  |
| 15 | 2.923949 | -1.654570 | -0.353053 | 1  | 1.655814  | 6.391356  | 0.368618  |
| 15 | 2.792763 | 1.558200  | -0.291291 | 1  | -0.222923 | 5.897166  | 1.921181  |
| 6  | 2.990648 | -1.890756 | 1.479244  | 45 | -1.518575 | 0.106149  | -1.112614 |
| 6  | 3.811562 | -2.846015 | 2.093033  | 6  | -8.576751 | -1.706747 | -0.765483 |
| 6  | 2.118979 | -1.135454 | 2.272962  | 6  | -7.446056 | -1.208899 | -0.155887 |
| 6  | 3.772482 | -3.027386 | 3.474457  | 6  | -6.575567 | -0.320344 | -0.841828 |
| 1  | 4.482001 | -3.451761 | 1.494012  | 6  | -6.898871 | 0.039133  | -2.187424 |
| 6  | 2.075611 | -1.318139 | 3.653913  | 6  | -8.062158 | -0.499349 | -2.791723 |
| 1  | 1.479825 | -0.406454 | 1.784281  | 6  | -8.889511 | -1.353474 | -2.097349 |
| 6  | 2.904512 | -2.264495 | 4.258831  | 1  | -9.229914 | -2.381996 | -0.219780 |
| 1  | 4.426439 | -3.759018 | 3.939703  | 1  | -7.210229 | -1.497045 | 0.861481  |
| 1  | 1.397453 | -0.718749 | 4.255446  | 6  | -5.378158 | 0.200213  | -0.243541 |
| 1  | 2.876204 | -2.407462 | 5.335376  | 6  | -6.029019 | 0.912917  | -2.890879 |
| 6  | 2.923308 | -3.422516 | -0.888885 | 1  | -8.288006 | -0.223230 | -3.818584 |
| 6  | 1.712756 | -4.098696 | -1.082813 | 1  | -9.779788 | -1.758117 | -2.570304 |
| 6  | 4.125568 | -4.144441 | -0.997427 | 6  | -4.913179 | 1.429826  | -2.288207 |
| 6  | 1.705028 | -5.460014 | -1.391463 | 6  | -4.583660 | 1.098073  | -0.940653 |
| 1  | 0.778125 | -3.563907 | -1.003584 | 1  | -6.258623 | 1.162790  | -3.923516 |
| 6  | 4.114524 | -5.503767 | -1.303732 | 6  | -6.853003 | 1.029669  | 4.639767  |
| 1  | 5.076135 | -3.642271 | -0.851953 | 6  | -5.882627 | 0.056979  | 4.711803  |
| 6  | 2.901307 | -6.166113 | -1.504474 | 6  | -5.250463 | -0.427001 | 3.537431  |
| 1  | 0.753605 | -5.961524 | -1.538917 | 6  | -5.633563 | 0.104534  | 2.266326  |
| 1  | 5.053976 | -6.043509 | -1.387820 | 6  | -6.648401 | 1.099114  | 2.225682  |
| 1  | 2.892121 | -7.225101 | -1.748233 | 6  | -7.239370 | 1.553055  | 3.382525  |
| 6  | 3.945446 | 2.266265  | -1.528866 | 1  | -3.964106 | -1.845987 | 4.540157  |

|    |           |           |           |                       |           |           |           |
|----|-----------|-----------|-----------|-----------------------|-----------|-----------|-----------|
| 1  | -7.325932 | 1.398257  | 5.545628  | 1                     | -6.410068 | -3.612736 | -4.213289 |
| 1  | -5.577777 | -0.351419 | 5.671991  | 6                     | -1.804346 | -2.989187 | 0.314874  |
| 6  | -4.236684 | -1.413234 | 3.580767  | 6                     | -0.713533 | -2.720286 | 1.157227  |
| 6  | -4.954739 | -0.329723 | 1.086456  | 6                     | -2.129144 | -4.319861 | 0.029276  |
| 1  | -6.941117 | 1.507635  | 1.265078  | 6                     | 0.000355  | -3.760207 | 1.749635  |
| 1  | -8.006143 | 2.320965  | 3.332805  | 1                     | -0.420625 | -1.690476 | 1.330357  |
| 6  | -3.903322 | -1.242344 | 1.173171  | 6                     | -1.396864 | -5.362218 | 0.603465  |
| 6  | -3.581717 | -1.803644 | 2.438440  | 1                     | -2.950965 | -4.545997 | -0.640292 |
| 1  | -4.254680 | 2.087904  | -2.844649 | 6                     | -0.344338 | -5.085693 | 1.475304  |
| 1  | -2.792626 | -2.540328 | 2.509267  | 1                     | 0.836898  | -3.536133 | 2.401543  |
| 15 | -2.924029 | 1.654506  | -0.352587 | 1                     | -1.655653 | -6.391399 | 0.369127  |
| 15 | -2.792838 | -1.558262 | -0.290678 | 1                     | 0.223456  | -5.897123 | 1.921216  |
| 6  | -2.990264 | 1.890832  | 1.479706  | 17                    | -0.098357 | -1.584659 | -2.203421 |
| 6  | -3.810977 | 2.846179  | 2.093619  | 17                    | 0.097843  | 1.584497  | -2.203597 |
| 6  | -2.118371 | 1.135611  | 2.273257  |                       |           |           |           |
| 6  | -3.771479 | 3.027723  | 3.475009  | <b>H<sub>2</sub>O</b> |           |           |           |
| 1  | -4.481577 | 3.451867  | 1.494718  | 8                     | -0.000000 | 0.000000  | 0.119426  |
| 6  | -2.074580 | 1.318471  | 3.654170  | 1                     | -0.000000 | 0.762602  | -0.477706 |
| 1  | -1.479374 | 0.406544  | 1.784472  | 1                     | -0.000000 | -0.762602 | -0.477706 |
| 6  | -2.903281 | 2.264922  | 4.259218  |                       |           |           |           |
| 1  | -4.425285 | 3.759424  | 3.940357  | <b>HCl</b>            |           |           |           |
| 1  | -1.396248 | 0.719148  | 4.255574  | 17                    | -0.000000 | -0.000000 | 0.071638  |
| 1  | -2.874640 | 2.408032  | 5.335736  | 1                     | 0.000000  | 0.000000  | -1.217848 |
| 6  | -2.923487 | 3.422440  | -0.888471 |                       |           |           |           |
| 6  | -1.712967 | 4.098605  | -1.082645 | <b>INT12a</b>         |           |           |           |
| 6  | -4.125754 | 4.144404  | -0.996697 | 45                    | -0.582683 | -0.448432 | 0.610084  |
| 6  | -1.705279 | 5.459926  | -1.391281 | 6                     | -5.047650 | 3.452465  | -1.713470 |
| 1  | -0.778329 | 3.563801  | -1.003628 | 6                     | -6.313745 | 3.479824  | -2.574828 |
| 6  | -4.114750 | 5.503735  | -1.302986 | 6                     | -4.385790 | 2.065051  | -1.674301 |
| 1  | -5.076298 | 3.642266  | -0.850975 | 1                     | -4.333353 | 4.195735  | -2.091398 |
| 6  | -2.901567 | 6.166054  | -1.504010 | 1                     | -5.291465 | 3.764023  | -0.690094 |
| 1  | -0.753877 | 5.961417  | -1.538934 | 1                     | -6.089009 | 3.204710  | -3.612955 |
| 1  | -5.054208 | 6.043504  | -1.386834 | 1                     | -6.775015 | 4.474508  | -2.583348 |
| 1  | -2.892412 | 7.225047  | -1.747749 | 1                     | -5.094066 | 1.328939  | -1.269410 |
| 6  | -3.945824 | -2.266333 | -1.527973 | 1                     | -4.158618 | 1.723309  | -2.694978 |
| 6  | -4.992823 | -3.124618 | -1.162552 | 14                    | -2.812731 | 1.967259  | -0.622767 |
| 6  | -3.791045 | -1.902636 | -2.871808 | 6                     | -1.441559 | 2.969705  | -1.423785 |
| 6  | -5.870616 | -3.613774 | -2.126878 | 6                     | -1.572366 | 3.548050  | -2.696657 |
| 1  | -5.138296 | -3.383715 | -0.117926 | 6                     | -0.299907 | 3.291655  | -0.667828 |
| 6  | -4.673591 | -2.391996 | -3.835198 | 6                     | -0.613847 | 4.440748  | -3.184362 |
| 1  | -2.988937 | -1.222701 | -3.142706 | 1                     | -2.438492 | 3.316963  | -3.311990 |
| 6  | -5.714454 | -3.244036 | -3.464710 | 6                     | 0.653967  | 4.187790  | -1.142173 |
| 1  | -6.691951 | -4.259540 | -1.831378 | 1                     | -0.166583 | 2.846216  | 0.308773  |
| 1  | -4.553512 | -2.095134 | -4.873288 | 6                     | 0.490592  | 4.773377  | -2.399630 |

|    |           |           |           |   |           |           |           |
|----|-----------|-----------|-----------|---|-----------|-----------|-----------|
| 1  | -0.738370 | 4.885210  | -4.168626 | 1 | 4.163573  | -4.063752 | -3.126463 |
| 1  | 1.524579  | 4.417548  | -0.535989 | 1 | 2.839899  | -4.906574 | 0.878884  |
| 6  | 5.475860  | 3.346061  | -0.635238 | 1 | 4.313633  | -5.428000 | -1.056570 |
| 6  | 4.769088  | 2.192086  | -0.386401 | 6 | -0.385279 | -1.356479 | -2.809369 |
| 6  | 3.654927  | 1.816803  | -1.190738 | 6 | -1.236786 | -0.340455 | -3.280349 |
| 6  | 3.340912  | 2.643922  | -2.314659 | 6 | -0.482151 | -2.628042 | -3.392152 |
| 6  | 4.089842  | 3.826847  | -2.550252 | 6 | -2.100802 | -0.569691 | -4.347887 |
| 6  | 5.128364  | 4.183094  | -1.722799 | 1 | -1.219544 | 0.636014  | -2.811942 |
| 1  | 6.313885  | 3.612112  | 0.002820  | 6 | -1.370520 | -2.864546 | -4.443914 |
| 1  | 5.066066  | 1.550046  | 0.433988  | 1 | 0.139728  | -3.438162 | -3.028986 |
| 6  | 2.876118  | 0.636941  | -0.930102 | 6 | -2.171043 | -1.834058 | -4.936212 |
| 6  | 2.296208  | 2.244664  | -3.178704 | 1 | -2.736427 | 0.236028  | -4.705057 |
| 1  | 3.821974  | 4.445684  | -3.402928 | 1 | -1.426297 | -3.856601 | -4.883898 |
| 1  | 5.691920  | 5.093013  | -1.907984 | 1 | -2.854966 | -2.016962 | -5.760126 |
| 6  | 1.544337  | 1.132588  | -2.902420 | 6 | 1.399460  | 1.872191  | 2.262498  |
| 6  | 1.795975  | 0.325660  | -1.761223 | 6 | 2.619703  | 2.541459  | 2.137561  |
| 1  | 2.077345  | 2.844935  | -4.056392 | 6 | 0.264060  | 2.584222  | 2.684637  |
| 6  | 6.903188  | -2.508949 | -1.079195 | 6 | 2.704182  | 3.912058  | 2.391126  |
| 6  | 6.394799  | -2.654202 | 0.189873  | 1 | 3.503334  | 1.995217  | 1.838516  |
| 6  | 5.248916  | -1.925895 | 0.602928  | 6 | 0.356446  | 3.945645  | 2.963698  |
| 6  | 4.606320  | -1.031522 | -0.309009 | 1 | -0.690903 | 2.075055  | 2.761834  |
| 6  | 5.161297  | -0.909696 | -1.614725 | 6 | 1.573017  | 4.616284  | 2.803517  |
| 6  | 6.276008  | -1.625095 | -1.987277 | 1 | 3.654642  | 4.422116  | 2.260972  |
| 1  | 5.215309  | -2.719787 | 2.613868  | 1 | -0.532912 | 4.482556  | 3.276398  |
| 1  | 7.781551  | -3.069458 | -1.386471 | 1 | 1.636135  | 5.683423  | 2.998197  |
| 1  | 6.861746  | -3.330466 | 0.901479  | 6 | 1.046196  | -0.640263 | 3.570369  |
| 6  | 4.718338  | -2.060755 | 1.906260  | 6 | 0.418601  | -1.888153 | 3.688665  |
| 6  | 3.422611  | -0.315739 | 0.096447  | 6 | 1.521890  | -0.003200 | 4.722474  |
| 1  | 4.687856  | -0.252331 | -2.332055 | 6 | 0.272805  | -2.493195 | 4.935180  |
| 1  | 6.673018  | -1.514966 | -2.992448 | 1 | 0.026232  | -2.366086 | 2.795788  |
| 6  | 2.901462  | -0.512590 | 1.377016  | 6 | 1.368438  | -0.605325 | 5.973054  |
| 6  | 3.587271  | -1.380128 | 2.275524  | 1 | 2.009109  | 0.963410  | 4.642440  |
| 1  | 0.751269  | 0.859134  | -3.583140 | 6 | 0.746277  | -1.850186 | 6.081810  |
| 1  | 3.200102  | -1.516136 | 3.276106  | 1 | -0.223937 | -3.456278 | 5.013085  |
| 15 | 0.631832  | -1.048112 | -1.307364 | 1 | 1.734215  | -0.099706 | 6.862577  |
| 15 | 1.215319  | 0.087423  | 1.886128  | 1 | 0.624735  | -2.314661 | 7.056451  |
| 6  | 1.774186  | -2.490965 | -1.273663 | 1 | 1.232437  | 5.475294  | -2.771627 |
| 6  | 2.608349  | -2.791055 | -2.359528 | 6 | -3.124820 | 2.697592  | 1.082959  |
| 6  | 1.859966  | -3.270210 | -0.114299 | 6 | -3.490297 | 1.883018  | 2.167514  |
| 6  | 3.510190  | -3.850642 | -2.285681 | 6 | -3.014562 | 4.080611  | 1.302326  |
| 1  | 2.561087  | -2.181334 | -3.257269 | 6 | -3.728761 | 2.427988  | 3.429512  |
| 6  | 2.768597  | -4.323985 | -0.035059 | 1 | -3.553640 | 0.808799  | 2.027648  |
| 1  | 1.226332  | -3.027424 | 0.731818  | 6 | -3.263335 | 4.633616  | 2.560093  |
| 6  | 3.596104  | -4.615149 | -1.120625 | 1 | -2.714442 | 4.732927  | 0.486410  |

|               |           |           |           |    |           |           |           |
|---------------|-----------|-----------|-----------|----|-----------|-----------|-----------|
| 6             | -3.615325 | 3.805983  | 3.628422  | 6  | -1.361219 | 0.413808  | 3.038485  |
| 1             | -3.993667 | 1.777142  | 4.258633  | 6  | -2.905999 | -1.649615 | 2.857614  |
| 1             | -3.174271 | 5.706950  | 2.708080  | 1  | -0.742422 | -1.667370 | 3.001234  |
| 1             | -3.798330 | 4.232198  | 4.611320  | 1  | -1.552191 | -1.177067 | 4.462103  |
| 1             | -7.057781 | 2.766907  | -2.199016 | 1  | -0.643002 | 0.860167  | 3.719686  |
| 6             | -2.600903 | -1.027412 | -0.171350 | 1  | -2.295983 | 0.973078  | 3.164767  |
| 6             | -2.410692 | 0.197363  | -0.373895 | 1  | -3.024079 | -2.685041 | 3.205960  |
| 1             | -1.329941 | 0.060943  | 1.938915  | 1  | -3.733322 | -1.092325 | 3.316994  |
| 6             | -5.239713 | -2.165853 | -1.061191 | 14 | -3.129739 | -1.591150 | 0.987087  |
| 1             | -5.808833 | -1.358167 | -0.573804 | 6  | -2.610685 | -3.174629 | 0.103249  |
| 6             | -4.238504 | -2.340313 | 1.912909  | 6  | -2.288203 | -3.158253 | -1.266666 |
| 1             | -4.502706 | -1.276114 | 2.015953  | 6  | -2.624024 | -4.420247 | 0.752243  |
| 6             | -2.875099 | -4.113474 | -0.401440 | 6  | -2.009930 | -4.333529 | -1.963060 |
| 1             | -2.961053 | -4.162065 | -1.498525 | 1  | -2.249183 | -2.219496 | -1.810913 |
| 6             | -3.058216 | -2.604071 | 2.861839  | 6  | -2.339558 | -5.602273 | 0.063957  |
| 1             | -3.339849 | -2.398571 | 3.904107  | 1  | -2.865180 | -4.474996 | 1.810911  |
| 1             | -2.731109 | -3.650485 | 2.814221  | 6  | -2.038442 | -5.561382 | -1.299021 |
| 1             | -2.206743 | -1.964103 | 2.613458  | 1  | -1.753577 | -4.284730 | -3.017422 |
| 6             | -5.477575 | -3.156128 | 2.317840  | 1  | -2.358594 | -6.553549 | 0.589388  |
| 1             | -5.713596 | -2.991285 | 3.378156  | 6  | 2.812969  | -3.348846 | -3.928151 |
| 1             | -6.362603 | -2.873047 | 1.738530  | 6  | 2.881228  | -2.310108 | -3.026307 |
| 1             | -5.321403 | -4.232370 | 2.185052  | 6  | 2.226748  | -2.382036 | -1.763452 |
| 6             | -6.168001 | -3.384754 | -1.211870 | 6  | 1.510451  | -3.580018 | -1.453897 |
| 1             | -7.055727 | -3.122408 | -1.803359 | 6  | 1.456623  | -4.633552 | -2.402887 |
| 1             | -5.658474 | -4.197643 | -1.743061 | 6  | 2.090275  | -4.525032 | -3.619148 |
| 1             | -6.515337 | -3.781543 | -0.253165 | 1  | 3.323188  | -3.264420 | -4.883564 |
| 6             | -4.809454 | -1.674945 | -2.452444 | 1  | 3.440706  | -1.418156 | -3.281697 |
| 1             | -5.685035 | -1.457548 | -3.080142 | 6  | 2.249389  | -1.299980 | -0.812051 |
| 1             | -4.195303 | -0.775078 | -2.397104 | 6  | 0.838573  | -3.677474 | -0.210139 |
| 1             | -4.214752 | -2.434781 | -2.973191 | 1  | 0.893971  | -5.526229 | -2.146259 |
| 6             | -3.562270 | -5.360362 | 0.185201  | 1  | 2.042125  | -5.337050 | -4.339012 |
| 1             | -4.628976 | -5.410931 | -0.052663 | 6  | 0.906971  | -2.657038 | 0.697720  |
| 1             | -3.092560 | -6.275602 | -0.199976 | 6  | 1.656915  | -1.473801 | 0.435157  |
| 1             | -3.465005 | -5.383486 | 1.276843  | 1  | 0.245493  | -4.559887 | 0.003954  |
| 6             | -1.379417 | -4.123899 | -0.061786 | 6  | 7.188432  | 0.009209  | -1.387360 |
| 1             | -0.872847 | -3.257175 | -0.484406 | 6  | 6.482090  | 1.147387  | -1.696976 |
| 1             | -1.215191 | -4.093369 | 1.021789  | 6  | 5.063792  | 1.157488  | -1.653490 |
| 1             | -0.888696 | -5.028729 | -0.445994 | 6  | 4.357557  | -0.028541 | -1.283848 |
| 14            | -3.729361 | -2.476402 | 0.074598  | 6  | 5.122223  | -1.185253 | -0.963962 |
|               |           |           |           | 6  | 6.496767  | -1.167743 | -1.016818 |
|               |           |           |           | 1  | 4.850277  | 3.229669  | -2.229547 |
|               |           |           |           | 1  | 8.274163  | 0.011486  | -1.420391 |
|               |           |           |           | 1  | 6.998019  | 2.062921  | -1.974291 |
|               |           |           |           | 6  | 4.321316  | 2.323804  | -1.945014 |
| <b>INT13a</b> |           |           |           |    |           |           |           |
| 45            | -0.565944 | 0.936345  | 1.124768  |    |           |           |           |
| 17            | 0.092943  | 3.078556  | 2.355683  |    |           |           |           |
| 6             | -1.578150 | -1.063656 | 3.366296  |    |           |           |           |

|    |           |           |           |               |           |           |           |
|----|-----------|-----------|-----------|---------------|-----------|-----------|-----------|
| 6  | 2.923563  | -0.015796 | -1.194321 | 6             | 0.062554  | 3.409896  | -3.145178 |
| 1  | 4.608120  | -2.088102 | -0.659541 | 6             | -0.471009 | 5.442437  | -1.313203 |
| 1  | 7.056442  | -2.063153 | -0.761934 | 1             | -0.162313 | 3.944585  | 0.209800  |
| 6  | 2.223190  | 1.168672  | -1.462840 | 6             | -0.218135 | 4.696682  | -3.596318 |
| 6  | 2.954249  | 2.328710  | -1.846036 | 1             | 0.267881  | 2.621631  | -3.862234 |
| 1  | 0.356030  | -2.740212 | 1.625871  | 6             | -0.490287 | 5.717045  | -2.679172 |
| 1  | 2.420813  | 3.247466  | -2.047436 | 1             | -0.680677 | 6.228161  | -0.592812 |
| 15 | 1.562475  | -0.132123 | 1.687494  | 1             | -0.228852 | 4.903678  | -4.662961 |
| 15 | 0.399507  | 1.416488  | -1.154015 | 1             | -0.715631 | 6.719476  | -3.033136 |
| 6  | 3.195508  | 0.723448  | 1.663439  | 1             | -1.823150 | -6.480317 | -1.838207 |
| 6  | 4.368880  | 0.003412  | 1.935007  | 6             | -4.948181 | -1.284981 | 0.561004  |
| 6  | 3.269185  | 2.104591  | 1.457421  | 6             | -5.766396 | -0.489899 | 1.382292  |
| 6  | 5.600661  | 0.649476  | 1.967211  | 6             | -5.477498 | -1.704195 | -0.673395 |
| 1  | 4.317739  | -1.065637 | 2.116343  | 6             | -7.052163 | -0.117669 | 0.988191  |
| 6  | 4.506247  | 2.750512  | 1.497906  | 1             | -5.391138 | -0.132481 | 2.337409  |
| 1  | 2.359778  | 2.670464  | 1.293291  | 6             | -6.759473 | -1.329781 | -1.078257 |
| 6  | 5.672050  | 2.026747  | 1.744170  | 1             | -4.876915 | -2.329197 | -1.329062 |
| 1  | 6.504909  | 0.078296  | 2.155391  | 6             | -7.550071 | -0.531404 | -0.248057 |
| 1  | 4.552722  | 3.823395  | 1.333747  | 1             | -7.659726 | 0.503841  | 1.640524  |
| 1  | 6.634042  | 2.531299  | 1.767321  | 1             | -7.144281 | -1.664290 | -2.038394 |
| 6  | 1.769426  | -0.934412 | 3.331470  | 1             | -8.548944 | -0.238963 | -0.560851 |
| 6  | 1.614557  | -0.071063 | 4.429778  | 6             | -2.327309 | 1.155894  | 0.489648  |
| 6  | 2.143739  | -2.263722 | 3.560381  | 6             | -2.139012 | -0.210591 | 0.212220  |
| 6  | 1.787664  | -0.543526 | 5.728262  | 6             | -3.344609 | 2.147926  | 0.346961  |
| 1  | 1.372858  | 0.974586  | 4.259302  | 6             | -4.500832 | 1.901483  | -0.429229 |
| 6  | 2.315302  | -2.733941 | 4.864271  | 6             | -3.170723 | 3.406459  | 0.966759  |
| 1  | 2.310823  | -2.937446 | 2.727719  | 6             | -5.455897 | 2.897102  | -0.586439 |
| 6  | 2.127677  | -1.880215 | 5.950714  | 1             | -4.629697 | 0.932248  | -0.896140 |
| 1  | 1.658467  | 0.134631  | 6.567038  | 6             | -4.141483 | 4.389323  | 0.816312  |
| 1  | 2.602568  | -3.769372 | 5.026684  | 1             | -2.271824 | 3.568510  | 1.555743  |
| 1  | 2.257648  | -2.249517 | 6.964133  | 6             | -5.277445 | 4.136799  | 0.038708  |
| 6  | -0.447058 | 0.498806  | -2.514783 | 1             | -6.344294 | 2.705709  | -1.180207 |
| 6  | 0.195000  | -0.446752 | -3.314717 | 1             | -4.014777 | 5.354929  | 1.296547  |
| 6  | -1.813387 | 0.749043  | -2.742556 | 1             | -6.030445 | 4.911375  | -0.081094 |
| 6  | -0.511315 | -1.183268 | -4.267930 | 1             | -1.903670 | -0.468092 | -0.818511 |
| 1  | 1.255128  | -0.603288 | -3.210761 |               |           |           |           |
| 6  | -2.519946 | 0.025039  | -3.699991 |               |           |           |           |
| 1  | -2.324566 | 1.518167  | -2.174356 |               |           |           |           |
| 6  | -1.874937 | -0.960929 | -4.453897 |               |           |           |           |
| 1  | 0.016624  | -1.926830 | -4.858036 |               |           |           |           |
| 1  | -3.576742 | 0.226806  | -3.850851 |               |           |           |           |
| 1  | -2.429997 | -1.535551 | -5.190038 |               |           |           |           |
| 6  | 0.079223  | 3.126805  | -1.767668 |               |           |           |           |
| 6  | -0.186166 | 4.153120  | -0.854739 |               |           |           |           |
|    |           |           |           | <b>INT14a</b> |           |           |           |
|    |           |           |           | 6             | 3.843607  | -2.869823 | 3.493666  |
|    |           |           |           | 6             | 3.447872  | -2.268896 | 2.320753  |
|    |           |           |           | 6             | 2.891084  | -0.960178 | 2.318347  |
|    |           |           |           | 6             | 2.760818  | -0.279447 | 3.569444  |
|    |           |           |           | 6             | 3.169876  | -0.928662 | 4.763202  |
|    |           |           |           | 6             | 3.700099  | -2.197555 | 4.730263  |
|    |           |           |           | 1             | 4.264361  | -3.871073 | 3.471377  |



|    |           |           |           |    |           |           |           |
|----|-----------|-----------|-----------|----|-----------|-----------|-----------|
| 1  | 3.551047  | -2.797243 | 1.380642  | 6  | 1.485864  | 5.801922  | 0.071313  |
| 6  | 2.438598  | -0.325201 | 1.116336  | 1  | 2.495249  | 4.255499  | -1.026877 |
| 6  | 2.224966  | 1.030206  | 3.578846  | 6  | 0.452994  | 6.110203  | 0.956446  |
| 1  | 3.056405  | -0.399748 | 5.706031  | 1  | -1.211289 | 5.325998  | 2.088322  |
| 1  | 4.011658  | -2.684734 | 5.649768  | 1  | 2.132697  | 6.587746  | -0.308683 |
| 6  | 1.809057  | 1.629932  | 2.416194  | 1  | 0.296035  | 7.136968  | 1.275183  |
| 6  | 1.892459  | 0.956900  | 1.167791  | 6  | -0.198622 | -1.716649 | 1.444562  |
| 1  | 2.144753  | 1.559711  | 4.524849  | 6  | 0.325716  | -2.896014 | 1.990817  |
| 6  | 6.546172  | -1.277570 | -1.833523 | 6  | -0.692552 | -0.727147 | 2.303388  |
| 6  | 5.480048  | -1.812442 | -2.518249 | 6  | 0.314229  | -3.098401 | 3.369995  |
| 6  | 4.169275  | -1.763502 | -1.977308 | 1  | 0.769416  | -3.644442 | 1.342021  |
| 6  | 3.949193  | -1.134655 | -0.712198 | 6  | -0.689116 | -0.922525 | 3.682361  |
| 6  | 5.074902  | -0.589548 | -0.034033 | 1  | -1.066710 | 0.199094  | 1.880359  |
| 6  | 6.337502  | -0.665167 | -0.576077 | 6  | -0.194988 | -2.113770 | 4.217772  |
| 1  | 3.228207  | -2.820253 | -3.612265 | 1  | 0.731983  | -4.010882 | 3.783705  |
| 1  | 7.546556  | -1.323662 | -2.254138 | 1  | -1.065933 | -0.140278 | 4.334893  |
| 1  | 5.623736  | -2.286974 | -3.485487 | 1  | -0.187287 | -2.266950 | 5.292884  |
| 6  | 3.064452  | -2.330162 | -2.655943 | 6  | -1.087824 | -2.809621 | -1.139734 |
| 6  | 2.616713  | -1.051546 | -0.181456 | 6  | -1.391464 | -2.705880 | -2.508807 |
| 1  | 4.930200  | -0.101942 | 0.921665  | 6  | -1.469613 | -3.966547 | -0.453998 |
| 1  | 7.180427  | -0.242170 | -0.037013 | 6  | -2.019214 | -3.751580 | -3.180863 |
| 6  | 1.553603  | -1.628790 | -0.876103 | 1  | -1.147132 | -1.792064 | -3.041687 |
| 6  | 1.804424  | -2.276254 | -2.117368 | 6  | -2.110979 | -5.007868 | -1.126528 |
| 17 | -1.261925 | 2.596229  | -2.436487 | 1  | -1.309888 | -4.048549 | 0.612501  |
| 1  | 1.404530  | 2.633135  | 2.452191  | 6  | -2.375448 | -4.911921 | -2.490884 |
| 1  | 0.984493  | -2.736485 | -2.651938 | 1  | -2.240501 | -3.653072 | -4.239892 |
| 15 | 1.091088  | 1.706287  | -0.324549 | 1  | -2.418550 | -5.889232 | -0.571561 |
| 15 | -0.216847 | -1.386091 | -0.355691 | 1  | -2.874713 | -5.725205 | -3.009933 |
| 6  | 2.419043  | 1.697346  | -1.581087 | 45 | -0.869271 | 0.613273  | -1.144098 |
| 6  | 3.735970  | 2.049746  | -1.253813 | 1  | -2.054610 | -0.099226 | -1.967039 |
| 6  | 2.118583  | 1.293652  | -2.889001 | 14 | -3.176675 | 0.424028  | -0.581321 |
| 6  | 4.738608  | 1.996685  | -2.219148 | 6  | -3.785798 | -1.283794 | -0.021840 |
| 1  | 3.979665  | 2.340199  | -0.236216 | 6  | -3.622939 | -1.830849 | 1.262075  |
| 6  | 3.127545  | 1.229655  | -3.849385 | 6  | -4.471736 | -2.075351 | -0.962781 |
| 1  | 1.096659  | 1.035650  | -3.147052 | 6  | -4.137674 | -3.082858 | 1.602127  |
| 6  | 4.437158  | 1.577710  | -3.516265 | 1  | -3.064478 | -1.296689 | 2.016788  |
| 1  | 5.758746  | 2.254303  | -1.951901 | 6  | -4.985430 | -3.328294 | -0.636003 |
| 1  | 2.888237  | 0.904002  | -4.857520 | 1  | -4.607453 | -1.711264 | -1.975006 |
| 1  | 5.223571  | 1.518814  | -4.263164 | 6  | -4.829291 | -3.834887 | 0.654858  |
| 6  | 0.861535  | 3.461802  | 0.138390  | 1  | -3.990905 | -3.467249 | 2.608265  |
| 6  | -0.197875 | 3.782425  | 0.999596  | 1  | -5.504794 | -3.910878 | -1.391890 |
| 6  | 1.694016  | 4.483041  | -0.334118 | 1  | -5.232881 | -4.810186 | 0.914177  |
| 6  | -0.389594 | 5.097281  | 1.418350  | 6  | -3.353256 | 1.744332  | 0.777849  |
| 1  | -0.881062 | 3.007214  | 1.329350  | 6  | -3.393616 | 3.090946  | 0.364479  |

|               |           |           |           |    |           |           |           |
|---------------|-----------|-----------|-----------|----|-----------|-----------|-----------|
| 6             | -3.527866 | 1.487692  | 2.149278  | 6  | 2.503282  | -0.976238 | -0.502870 |
| 6             | -3.621887 | 4.124691  | 1.270834  | 1  | 4.810048  | -0.415637 | 0.840874  |
| 1             | -3.217229 | 3.336179  | -0.677601 | 1  | 7.072568  | -0.308198 | -0.101788 |
| 6             | -3.726004 | 2.522456  | 3.066713  | 6  | 1.436692  | -1.315833 | -1.338118 |
| 1             | -3.543402 | 0.469991  | 2.517123  | 6  | 1.695694  | -1.603025 | -2.705931 |
| 6             | -3.780695 | 3.846127  | 2.630056  | 1  | 1.224621  | 1.704445  | 3.131261  |
| 1             | -3.655933 | 5.150804  | 0.915134  | 1  | 0.877943  | -1.896701 | -3.350782 |
| 1             | -3.860108 | 2.289219  | 4.120114  | 15 | 1.034556  | 1.737463  | 0.194528  |
| 1             | -3.951029 | 4.651227  | 3.340201  | 15 | -0.325436 | -1.189126 | -0.743612 |
| 6             | -4.390131 | 1.006556  | -1.944779 | 6  | 2.394125  | 2.076135  | -0.987113 |
| 1             | -3.956133 | 1.923566  | -2.359513 | 6  | 3.718332  | 2.310125  | -0.592028 |
| 1             | -4.395259 | 0.275238  | -2.761613 | 6  | 2.083625  | 2.042610  | -2.353261 |
| 6             | -5.770498 | 1.239745  | -1.418480 | 6  | 4.712541  | 2.514707  | -1.546601 |
| 1             | -5.876774 | 2.081890  | -0.734515 | 1  | 3.975294  | 2.298575  | 0.463166  |
| 6             | -6.845763 | 0.491998  | -1.682528 | 6  | 3.080580  | 2.238072  | -3.308455 |
| 1             | -6.797167 | -0.365147 | -2.350884 | 1  | 1.060219  | 1.827259  | -2.650063 |
| 1             | -7.814341 | 0.708505  | -1.240214 | 6  | 4.396065  | 2.473946  | -2.905857 |
|               |           |           |           | 1  | 5.739251  | 2.674076  | -1.231474 |
|               |           |           |           | 1  | 2.833796  | 2.190613  | -4.365438 |
|               |           |           |           | 1  | 5.176632  | 2.612683  | -3.648313 |
|               |           |           |           | 6  | 0.874246  | 3.281949  | 1.183110  |
|               |           |           |           | 6  | -0.257456 | 3.386224  | 2.008002  |
|               |           |           |           | 6  | 1.768385  | 4.359007  | 1.125287  |
|               |           |           |           | 6  | -0.462448 | 4.516923  | 2.795614  |
|               |           |           |           | 1  | -0.989695 | 2.582679  | 2.006909  |
|               |           |           |           | 6  | 1.548257  | 5.502259  | 1.895954  |
|               |           |           |           | 1  | 2.632945  | 4.312551  | 0.473118  |
|               |           |           |           | 6  | 0.441873  | 5.579340  | 2.742995  |
|               |           |           |           | 1  | -1.343849 | 4.578006  | 3.427185  |
|               |           |           |           | 1  | 2.247819  | 6.331766  | 1.836840  |
|               |           |           |           | 1  | 0.277244  | 6.467501  | 3.346821  |
|               |           |           |           | 6  | -0.321824 | -2.251170 | 0.748718  |
|               |           |           |           | 6  | 0.235157  | -3.537803 | 0.743975  |
|               |           |           |           | 6  | -0.869979 | -1.743809 | 1.930519  |
|               |           |           |           | 6  | 0.236348  | -4.305006 | 1.906498  |
|               |           |           |           | 1  | 0.686023  | -3.928431 | -0.164066 |
|               |           |           |           | 6  | -0.868492 | -2.511990 | 3.093198  |
|               |           |           |           | 1  | -1.282448 | -0.742363 | 1.922424  |
|               |           |           |           | 6  | -0.313093 | -3.791531 | 3.083807  |
|               |           |           |           | 1  | 0.686316  | -5.293340 | 1.901279  |
|               |           |           |           | 1  | -1.299608 | -2.107453 | 4.003878  |
|               |           |           |           | 1  | -0.299481 | -4.387140 | 3.992134  |
|               |           |           |           | 6  | -1.287844 | -2.169521 | -1.979311 |
|               |           |           |           | 6  | -1.498880 | -1.603513 | -3.249197 |
| <b>INT15a</b> |           |           |           |    |           |           |           |
| 6             | 3.682811  | -3.845797 | 2.446871  |    |           |           |           |
| 6             | 3.303263  | -2.909496 | 1.512696  |    |           |           |           |
| 6             | 2.724406  | -1.670977 | 1.905767  |    |           |           |           |
| 6             | 2.543581  | -1.427592 | 3.303663  |    |           |           |           |
| 6             | 2.929997  | -2.418979 | 4.242366  |    |           |           |           |
| 6             | 3.491501  | -3.604134 | 3.827176  |    |           |           |           |
| 1             | 4.124322  | -4.783395 | 2.120854  |    |           |           |           |
| 1             | 3.439975  | -3.113717 | 0.457849  |    |           |           |           |
| 6             | 2.313210  | -0.679555 | 0.954311  |    |           |           |           |
| 6             | 1.989675  | -0.190384 | 3.712059  |    |           |           |           |
| 1             | 2.776553  | -2.218729 | 5.299843  |    |           |           |           |
| 1             | 3.788602  | -4.354307 | 4.554551  |    |           |           |           |
| 6             | 1.632208  | 0.761037  | 2.789516  |    |           |           |           |
| 6             | 1.780704  | 0.532771  | 1.394564  |    |           |           |           |
| 1             | 1.861039  | 0.003065  | 4.774265  |    |           |           |           |
| 6             | 6.445468  | -0.780167 | -2.123526 |    |           |           |           |
| 6             | 5.380910  | -1.085317 | -2.939374 |    |           |           |           |
| 6             | 4.064551  | -1.173777 | -2.416689 |    |           |           |           |
| 6             | 3.837934  | -0.922488 | -1.027157 |    |           |           |           |
| 6             | 4.962613  | -0.610323 | -0.213461 |    |           |           |           |
| 6             | 6.230265  | -0.547052 | -0.745068 |    |           |           |           |
| 1             | 3.130559  | -1.736386 | -4.283719 |    |           |           |           |
| 1             | 7.450044  | -0.720172 | -2.532593 |    |           |           |           |
| 1             | 5.530669  | -1.271006 | -4.000014 |    |           |           |           |
| 6             | 2.960999  | -1.520948 | -3.231536 |    |           |           |           |

|               |           |           |           |    |           |           |           |
|---------------|-----------|-----------|-----------|----|-----------|-----------|-----------|
| 6             | -1.928896 | -3.374593 | -1.668900 | 15 | 0.182382  | -1.439314 | -0.488760 |
| 6             | -2.283312 | -2.249885 | -4.199293 | 15 | 0.961221  | 1.843813  | 0.263693  |
| 1             | -1.070906 | -0.629521 | -3.470375 | 6  | -5.711445 | 0.385119  | 0.716893  |
| 6             | -2.743828 | -4.007413 | -2.612826 | 6  | -6.352960 | 0.914790  | -0.415696 |
| 1             | -1.815190 | -3.812063 | -0.684618 | 6  | -7.709413 | 1.244090  | -0.389003 |
| 6             | -2.913717 | -3.457192 | -3.881918 | 6  | -8.452390 | 1.051103  | 0.776628  |
| 1             | -2.430129 | -1.797534 | -5.176077 | 6  | -7.834167 | 0.529848  | 1.915691  |
| 1             | -3.244877 | -4.934927 | -2.349189 | 6  | -6.478646 | 0.202415  | 1.882416  |
| 1             | -3.544585 | -3.952825 | -4.614240 | 1  | -8.185946 | 1.652963  | -1.276299 |
| 45            | -0.997432 | 0.888257  | -0.541385 | 1  | -9.508418 | 1.307456  | 0.799238  |
| 14            | -3.265850 | 0.367656  | -0.675613 | 1  | -8.408497 | 0.380849  | 2.826601  |
| 6             | -3.992153 | -0.673249 | 0.714559  | 1  | -6.005926 | -0.195984 | 2.777649  |
| 6             | -3.889299 | -0.292143 | 2.065216  | 14 | -3.895174 | -0.112389 | 0.685296  |
| 6             | -4.502094 | -1.955363 | 0.442578  | 8  | -3.220872 | 0.417389  | 2.143593  |
| 6             | -4.288110 | -1.142381 | 3.095818  | 1  | -3.290983 | 1.374623  | 2.270645  |
| 1             | -3.465382 | 0.675838  | 2.317121  | 1  | -1.031284 | 0.506492  | 1.063212  |
| 6             | -4.886918 | -2.818615 | 1.469028  | 6  | 6.443694  | 0.600150  | -0.820404 |
| 1             | -4.586469 | -2.293297 | -0.585914 | 6  | 5.239523  | 0.301999  | -0.224256 |
| 6             | -4.784109 | -2.413799 | 2.800537  | 6  | 4.175220  | -0.283830 | -0.964959 |
| 1             | -4.201496 | -0.818271 | 4.130214  | 6  | 4.395157  | -0.554625 | -2.352070 |
| 1             | -5.269274 | -3.807732 | 1.229337  | 6  | 5.640383  | -0.218747 | -2.943293 |
| 1             | -5.084531 | -3.084129 | 3.601392  | 6  | 6.648824  | 0.344944  | -2.196158 |
| 6             | -3.247844 | 2.228921  | -0.317460 | 1  | 7.241047  | 1.043482  | -0.230391 |
| 6             | -2.340324 | 2.958986  | -1.135000 | 1  | 5.091610  | 0.517063  | 0.826847  |
| 6             | -3.800568 | 2.913080  | 0.792194  | 6  | 2.903506  | -0.586729 | -0.371468 |
| 6             | -2.013090 | 4.297987  | -0.858156 | 6  | 3.357517  | -1.164501 | -3.097434 |
| 1             | -1.951248 | 2.500842  | -2.050176 | 1  | 5.783277  | -0.424591 | -4.001175 |
| 6             | -3.499424 | 4.245345  | 1.042737  | 1  | 7.600754  | 0.592152  | -2.657413 |
| 1             | -4.504906 | 2.395955  | 1.437069  | 6  | 2.165182  | -1.493962 | -2.504309 |
| 6             | -2.592475 | 4.940349  | 0.225918  | 6  | 1.909337  | -1.208445 | -1.134130 |
| 1             | -1.305120 | 4.821496  | -1.494812 | 1  | 3.523885  | -1.384394 | -4.149172 |
| 1             | -3.967378 | 4.756893  | 1.880620  | 6  | 4.536998  | -2.697138 | 4.044803  |
| 1             | -2.337943 | 5.971555  | 0.451448  | 6  | 3.737905  | -1.642115 | 4.420649  |
| 6             | -4.264089 | 0.031802  | -2.275859 | 6  | 3.139450  | -0.798483 | 3.449470  |
| 1             | -3.762977 | 0.579249  | -3.084916 | 6  | 3.345897  | -1.064795 | 2.059446  |
| 1             | -4.206217 | -1.031802 | -2.528440 | 6  | 4.176825  | -2.164648 | 1.707740  |
| 6             | -5.682915 | 0.478881  | -2.117992 | 6  | 4.763171  | -2.951951 | 2.672322  |
| 1             | -5.833211 | 1.558492  | -2.070966 | 1  | 2.203154  | 0.532075  | 4.874661  |
| 6             | -6.741450 | -0.324431 | -1.975992 | 1  | 4.996479  | -3.332108 | 4.796926  |
| 1             | -6.642053 | -1.407523 | -2.003142 | 1  | 3.558660  | -1.429845 | 5.471657  |
| 1             | -7.741959 | 0.069413  | -1.819967 | 6  | 2.351180  | 0.318544  | 3.818991  |
|               |           |           |           | 6  | 2.707681  | -0.238944 | 1.074094  |
|               |           |           |           | 1  | 4.345167  | -2.381564 | 0.660074  |
| <b>INT16a</b> |           |           |           | 1  | 5.397445  | -3.782947 | 2.376425  |
| 45            | -0.855771 | 0.641551  | -0.437156 |    |           |           |           |

|   |           |           |           |               |           |           |           |
|---|-----------|-----------|-----------|---------------|-----------|-----------|-----------|
| 6 | 1.960294  | 0.870817  | 1.477744  | 6             | 0.758948  | -3.703813 | 3.515756  |
| 6 | 1.799673  | 1.136202  | 2.865558  | 1             | -0.725724 | -2.343481 | 4.289930  |
| 1 | 1.398158  | -1.979930 | -3.094521 | 1             | 2.220021  | -4.893326 | 2.466586  |
| 1 | 1.223636  | 1.999200  | 3.176487  | 1             | 0.904490  | -4.216519 | 4.462254  |
| 6 | 2.154462  | 2.357437  | -1.024418 | 1             | -5.784272 | 1.069768  | -1.328880 |
| 6 | 3.430896  | 2.855821  | -0.729994 | 6             | -3.066698 | 0.636470  | -0.803038 |
| 6 | 1.771715  | 2.203404  | -2.363930 | 6             | -2.505190 | 1.983837  | -0.731839 |
| 6 | 4.309193  | 3.192934  | -1.757703 | 6             | -3.392448 | 0.111319  | -2.113940 |
| 1 | 3.745675  | 2.950700  | 0.304966  | 6             | -2.145143 | 2.635275  | -1.961154 |
| 6 | 2.654574  | 2.532750  | -3.391718 | 1             | -2.638349 | 2.608306  | 0.150091  |
| 1 | 0.785498  | 1.810446  | -2.595778 | 6             | -3.031849 | 0.767645  | -3.260131 |
| 6 | 3.924795  | 3.025748  | -3.089412 | 1             | -3.912857 | -0.840219 | -2.177180 |
| 1 | 5.304276  | 3.555686  | -1.519711 | 6             | -2.337666 | 2.019966  | -3.177158 |
| 1 | 2.354567  | 2.393044  | -4.426407 | 1             | -1.687722 | 3.620724  | -1.910119 |
| 1 | 4.618756  | 3.270202  | -3.888360 | 1             | -3.264159 | 0.346483  | -4.234720 |
| 6 | 0.530885  | 3.403785  | 1.141857  | 1             | -2.021984 | 2.518860  | -4.090097 |
| 6 | 1.147941  | 4.635891  | 0.887574  | 6             | -3.755245 | -1.997334 | 0.750549  |
| 6 | -0.549946 | 3.367021  | 2.042545  | 1             | -3.900097 | -2.278237 | 1.804258  |
| 6 | 0.708045  | 5.795998  | 1.529344  | 1             | -2.739700 | -2.295739 | 0.471005  |
| 1 | 1.967160  | 4.696131  | 0.180443  | 6             | -4.770463 | -2.680270 | -0.118122 |
| 6 | -0.972771 | 4.520490  | 2.698609  | 1             | -5.811816 | -2.540967 | 0.173163  |
| 1 | -1.059286 | 2.423323  | 2.215526  | 6             | -4.492058 | -3.394726 | -1.211799 |
| 6 | -0.345864 | 5.742791  | 2.440740  | 1             | -5.279773 | -3.844662 | -1.810706 |
| 1 | 1.195089  | 6.743443  | 1.315033  | 1             | -3.471065 | -3.556462 | -1.542820 |
| 1 | -1.801330 | 4.470011  | 3.400059  |               |           |           |           |
| 1 | -0.684551 | 6.646325  | 2.939570  |               |           |           |           |
| 6 | -0.533287 | -2.686371 | -1.640134 | <b>INT17a</b> |           |           |           |
| 6 | -0.612632 | -4.062990 | -1.388415 | 45            | 0.725660  | 1.051663  | -0.002403 |
| 6 | -1.077720 | -2.186129 | -2.835825 | 15            | 0.197924  | -1.110839 | 0.637812  |
| 6 | -1.190490 | -4.920625 | -2.326422 | 15            | -1.455905 | 1.833948  | -0.337292 |
| 1 | -0.232233 | -4.467638 | -0.457712 | 6             | 4.396914  | -1.049640 | -0.379253 |
| 6 | -1.642789 | -3.044512 | -3.776723 | 6             | 3.954258  | -2.206983 | -1.042454 |
| 1 | -1.074857 | -1.115800 | -3.015593 | 6             | 4.299776  | -3.482233 | -0.593029 |
| 6 | -1.696453 | -4.417686 | -3.526295 | 6             | 5.125786  | -3.625345 | 0.523871  |
| 1 | -1.248689 | -5.984777 | -2.115040 | 6             | 5.589878  | -2.488999 | 1.190444  |
| 1 | -2.058523 | -2.637850 | -4.694393 | 6             | 5.218567  | -1.218290 | 0.749268  |
| 1 | -2.147369 | -5.088303 | -4.252208 | 1             | 3.922732  | -4.358047 | -1.114284 |
| 6 | 0.412916  | -2.357432 | 1.079990  | 1             | 5.408038  | -4.615556 | 0.872403  |
| 6 | -0.330107 | -1.984178 | 2.208562  | 1             | 6.234050  | -2.592968 | 2.059835  |
| 6 | 1.325649  | -3.417459 | 1.185227  | 1             | 5.576640  | -0.349843 | 1.295523  |
| 6 | -0.153290 | -2.652713 | 3.420029  | 14            | 3.921477  | 0.633673  | -1.070065 |
| 1 | -1.036255 | -1.163996 | 2.143680  | 8             | 3.069282  | 0.423501  | -2.500599 |
| 6 | 1.493630  | -4.089939 | 2.393331  | 1             | 2.116685  | 0.388819  | -2.302559 |
| 1 | 1.928293  | -3.694534 | 0.325603  | 1             | 0.595160  | 0.578426  | -1.456432 |
|   |           |           |           | 6             | -6.362983 | -1.019638 | 0.393971  |

|   |           |           |           |   |           |           |           |
|---|-----------|-----------|-----------|---|-----------|-----------|-----------|
| 6 | -5.071992 | -0.956514 | -0.079622 | 6 | -0.674855 | 3.787212  | -2.162872 |
| 6 | -3.963754 | -1.214162 | 0.773836  | 6 | -2.610760 | 5.663802  | -1.472707 |
| 6 | -4.228712 | -1.573220 | 2.132352  | 1 | -3.326997 | 4.199769  | -0.073531 |
| 6 | -5.569389 | -1.623724 | 2.593488  | 6 | -0.704738 | 5.022178  | -2.806049 |
| 6 | -6.617982 | -1.348322 | 1.746389  | 1 | 0.100796  | 3.067588  | -2.403187 |
| 1 | -7.193605 | -0.814364 | -0.275469 | 6 | -1.673421 | 5.968034  | -2.459434 |
| 1 | -4.888470 | -0.695949 | -1.115100 | 1 | -3.361851 | 6.396654  | -1.190497 |
| 6 | -2.607288 | -1.088135 | 0.324622  | 1 | 0.037517  | 5.252218  | -3.565449 |
| 6 | -3.136451 | -1.877447 | 2.979708  | 1 | -1.689765 | 6.937667  | -2.949002 |
| 1 | -5.750968 | -1.887622 | 3.632315  | 6 | 1.160360  | -1.402398 | 2.166276  |
| 1 | -7.641045 | -1.390070 | 2.109281  | 6 | 2.234320  | -2.298604 | 2.230340  |
| 6 | -1.846389 | -1.791407 | 2.520953  | 6 | 0.923809  | -0.549653 | 3.262292  |
| 6 | -1.556576 | -1.361569 | 1.196149  | 6 | 3.029529  | -2.363785 | 3.375381  |
| 1 | -3.333919 | -2.187602 | 4.002921  | 1 | 2.469669  | -2.930824 | 1.383001  |
| 6 | -2.721423 | -3.795830 | -4.038807 | 6 | 1.717602  | -0.619780 | 4.403629  |
| 6 | -2.542165 | -2.491007 | -4.435579 | 1 | 0.108959  | 0.165762  | 3.220408  |
| 6 | -2.448668 | -1.446714 | -3.478925 | 6 | 2.775086  | -1.530928 | 4.465134  |
| 6 | -2.549726 | -1.757407 | -2.085751 | 1 | 3.858356  | -3.063285 | 3.402813  |
| 6 | -2.750746 | -3.115442 | -1.711991 | 1 | 1.514011  | 0.040513  | 5.242399  |
| 6 | -2.824386 | -4.106963 | -2.661842 | 1 | 3.397839  | -1.586085 | 5.353583  |
| 1 | -2.213673 | 0.151741  | -4.918324 | 6 | 0.428731  | -2.612174 | -0.394412 |
| 1 | -2.782674 | -4.589308 | -4.778187 | 6 | 0.291994  | -3.900140 | 0.143898  |
| 1 | -2.462530 | -2.237812 | -5.489878 | 6 | 0.657143  | -2.469134 | -1.766480 |
| 6 | -2.254171 | -0.096171 | -3.860429 | 6 | 0.418441  | -5.021844 | -0.673137 |
| 6 | -2.402516 | -0.715324 | -1.112765 | 1 | 0.090880  | -4.023344 | 1.203981  |
| 1 | -2.812181 | -3.367479 | -0.660463 | 6 | 0.765550  | -3.589969 | -2.589138 |
| 1 | -2.952971 | -5.139856 | -2.352107 | 1 | 0.742179  | -1.474309 | -2.188662 |
| 6 | -2.151277 | 0.595215  | -1.524090 | 6 | 0.655694  | -4.867951 | -2.041888 |
| 6 | -2.107672 | 0.888845  | -2.914967 | 1 | 0.322463  | -6.015813 | -0.244765 |
| 1 | -1.031581 | -2.044744 | 3.186455  | 1 | 0.927652  | -3.461677 | -3.654952 |
| 1 | -1.944775 | 1.911299  | -3.234081 | 1 | 0.741945  | -5.742836 | -2.680220 |
| 6 | -2.662486 | 1.936775  | 1.037682  | 1 | 3.330787  | -2.104193 | -1.922989 |
| 6 | -4.049899 | 1.945214  | 0.836873  | 6 | 2.853429  | 1.606811  | 0.113376  |
| 6 | -2.161504 | 1.986399  | 2.344753  | 6 | 2.111383  | 2.755754  | -0.387667 |
| 6 | -4.920079 | 1.986870  | 1.924337  | 6 | 2.911210  | 1.497147  | 1.548186  |
| 1 | -4.446755 | 1.890168  | -0.171777 | 6 | 1.774718  | 3.853958  | 0.483121  |
| 6 | -3.031808 | 2.028093  | 3.434097  | 1 | 2.161579  | 2.970303  | -1.452030 |
| 1 | -1.085054 | 1.982744  | 2.498329  | 6 | 2.361324  | 2.461461  | 2.368466  |
| 6 | -4.411909 | 2.022855  | 3.224348  | 1 | 3.355563  | 0.610439  | 1.990213  |
| 1 | -5.992451 | 1.962091  | 1.757700  | 6 | 1.869208  | 3.703845  | 1.837362  |
| 1 | -2.633236 | 2.054953  | 4.444477  | 1 | 1.389584  | 4.770290  | 0.044148  |
| 1 | -5.091228 | 2.039861  | 4.071867  | 1 | 2.380823  | 2.311353  | 3.444616  |
| 6 | -1.628908 | 3.460945  | -1.182771 | 1 | 1.568692  | 4.496911  | 2.515838  |
| 6 | -2.593241 | 4.418358  | -0.840794 | 6 | 5.445587  | 1.639536  | -1.541466 |

|   |          |          |           |   |          |           |           |
|---|----------|----------|-----------|---|----------|-----------|-----------|
| 1 | 6.013376 | 1.103020 | -2.314515 | 6 | 0.851903 | -1.686879 | -2.390616 |
| 1 | 5.070931 | 2.556619 | -2.020153 | 6 | 1.075454 | -1.442894 | -1.002130 |
| 6 | 6.370639 | 2.013831 | -0.371965 | 1 | 1.696357 | -1.978603 | -4.329485 |
| 1 | 6.808700 | 1.102136 | 0.054283  | 6 | 4.260617 | -3.318360 | 3.805747  |
| 1 | 5.780893 | 2.477298 | 0.431340  | 6 | 4.039158 | -1.991609 | 4.094979  |
| 6 | 7.498209 | 2.965361 | -0.783969 | 6 | 3.527248 | -1.108081 | 3.109768  |
| 1 | 8.149321 | 3.212512 | 0.063239  | 6 | 3.236086 | -1.612131 | 1.802913  |
| 1 | 8.121136 | 2.517895 | -1.568222 | 6 | 3.486955 | -2.984989 | 1.533348  |
| 1 | 7.091218 | 3.903716 | -1.180188 | 6 | 3.984339 | -3.816848 | 2.509837  |

**INT18a**

|    |           |           |           |    |           |           |           |
|----|-----------|-----------|-----------|----|-----------|-----------|-----------|
| 45 | -0.867610 | 1.000093  | -0.470216 | 1  | 4.648700  | -3.986758 | 4.569047  |
| 17 | -1.185629 | 3.369229  | -1.384915 | 1  | 4.248103  | -1.598958 | 5.086840  |
| 6  | -3.834929 | 3.727186  | -0.538607 | 6  | 3.285484  | 0.260043  | 3.381552  |
| 6  | -2.390951 | 4.020819  | -0.148975 | 6  | 2.662293  | -0.743254 | 0.827091  |
| 6  | -4.080066 | 2.386420  | -1.246517 | 1  | 3.265948  | -3.371662 | 0.544806  |
| 1  | -4.401621 | 3.758232  | 0.402587  | 1  | 4.162522  | -4.865241 | 2.288085  |
| 1  | -4.209007 | 4.551460  | -1.159615 | 6  | 2.390403  | 0.587584  | 1.143912  |
| 1  | -2.091953 | 3.528314  | 0.772428  | 6  | 2.735722  | 1.082792  | 2.428641  |
| 1  | -5.162555 | 2.204596  | -1.266734 | 1  | -0.166066 | -1.767509 | -2.752688 |
| 1  | -3.771842 | 2.476975  | -2.296149 | 1  | 2.548787  | 2.122868  | 2.666275  |
| 14 | -3.229424 | 0.775740  | -0.597806 | 15 | -0.441874 | -1.115961 | 0.012074  |
| 6  | -3.958579 | 0.547470  | 1.163572  | 15 | 1.390136  | 1.613762  | -0.028517 |
| 6  | -5.044669 | -0.277366 | 1.506938  | 6  | -0.071122 | -1.538483 | 1.767415  |
| 6  | -3.338544 | 1.244082  | 2.218629  | 6  | 0.287534  | -2.840741 | 2.144104  |
| 6  | -5.488197 | -0.398169 | 2.826268  | 6  | -0.242616 | -0.564853 | 2.755237  |
| 1  | -5.540316 | -0.859319 | 0.736201  | 6  | 0.506711  | -3.149849 | 3.483319  |
| 6  | -3.777022 | 1.139823  | 3.538364  | 1  | 0.398224  | -3.610519 | 1.387101  |
| 1  | -2.464382 | 1.853462  | 1.998438  | 6  | -0.033178 | -0.876238 | 4.098716  |
| 6  | -4.858646 | 0.313176  | 3.848279  | 1  | -0.545398 | 0.431040  | 2.451226  |
| 1  | -6.324965 | -1.053466 | 3.056532  | 6  | 0.348916  | -2.166903 | 4.463757  |
| 1  | -3.267802 | 1.689819  | 4.326723  | 1  | 0.809170  | -4.154670 | 3.762310  |
| 6  | 5.874266  | -1.369394 | -1.934266 | 1  | -0.168745 | -0.110268 | 4.857224  |
| 6  | 4.833791  | -1.230114 | -1.042401 | 1  | 0.519210  | -2.410459 | 5.508742  |
| 6  | 3.484271  | -1.387727 | -1.459173 | 6  | -1.510455 | -2.583651 | -0.342250 |
| 6  | 3.235133  | -1.676868 | -2.837157 | 6  | -2.769984 | -2.590565 | 0.273403  |
| 6  | 4.325592  | -1.802810 | -3.733667 | 6  | -1.136024 | -3.688810 | -1.116330 |
| 6  | 5.622161  | -1.657569 | -3.294351 | 6  | -3.660253 | -3.638728 | 0.067471  |
| 1  | 6.897697  | -1.250178 | -1.589802 | 1  | -3.059953 | -1.765841 | 0.912047  |
| 1  | 5.041319  | -0.997776 | -0.005187 | 6  | -2.030091 | -4.742225 | -1.322897 |
| 6  | 2.376943  | -1.243294 | -0.553108 | 1  | -0.150882 | -3.740155 | -1.563912 |
| 6  | 1.891771  | -1.800392 | -3.275099 | 6  | -3.299445 | -4.713168 | -0.747673 |
| 1  | 4.115468  | -2.015715 | -4.778781 | 1  | -4.639805 | -3.606565 | 0.535275  |
| 1  | 6.450692  | -1.759397 | -3.989442 | 1  | -1.728120 | -5.586550 | -1.936958 |
|    |           |           |           | 1  | -3.998250 | -5.526055 | -0.923631 |

|   |           |           |           |    |           |           |           |
|---|-----------|-----------|-----------|----|-----------|-----------|-----------|
| 6 | 2.488829  | 1.769136  | -1.486377 | 1  | 3.946640  | -1.982400 | 1.641835  |
| 6 | 3.878095  | 1.922406  | -1.378608 | 6  | 2.115738  | -0.004151 | 1.205345  |
| 6 | 1.904486  | 1.668241  | -2.755849 | 6  | 0.950262  | 0.921928  | 3.603020  |
| 6 | 4.669702  | 1.974272  | -2.523505 | 1  | 1.809322  | -0.344447 | 5.816479  |
| 1 | 4.339331  | 1.969558  | -0.396243 | 1  | 3.515287  | -2.139119 | 5.910854  |
| 6 | 2.698326  | 1.723823  | -3.901439 | 6  | 0.622913  | 1.497768  | 2.402631  |
| 1 | 0.831717  | 1.510413  | -2.829338 | 6  | 1.213496  | 1.057196  | 1.184077  |
| 6 | 4.080649  | 1.872259  | -3.786317 | 1  | 0.477186  | 1.262722  | 4.520571  |
| 1 | 5.747508  | 2.070898  | -2.431849 | 6  | 6.707641  | 0.251616  | -1.136370 |
| 1 | 2.238732  | 1.630109  | -4.881317 | 6  | 5.943808  | -0.573279 | -1.928744 |
| 1 | 4.701759  | 1.896929  | -4.677122 | 6  | 4.604046  | -0.883494 | -1.578087 |
| 6 | 1.406039  | 3.278567  | 0.753538  | 6  | 4.038255  | -0.319254 | -0.391906 |
| 6 | 0.519891  | 3.494500  | 1.823187  | 6  | 4.856446  | 0.530156  | 0.403087  |
| 6 | 2.167422  | 4.352389  | 0.280596  | 6  | 6.155857  | 0.804184  | 0.043500  |
| 6 | 0.411812  | 4.749816  | 2.416733  | 1  | 4.235864  | -2.186715 | -3.263264 |
| 1 | -0.091599 | 2.669265  | 2.178244  | 1  | 7.732904  | 0.480656  | -1.412567 |
| 6 | 2.047872  | 5.615411  | 0.866269  | 1  | 6.354759  | -1.004507 | -2.838017 |
| 1 | 2.844974  | 4.207465  | -0.553641 | 6  | 3.805348  | -1.742707 | -2.369170 |
| 6 | 1.174330  | 5.817766  | 1.934413  | 6  | 2.675630  | -0.601390 | -0.050727 |
| 1 | -0.273933 | 4.898625  | 3.246573  | 1  | 4.438679  | 0.969254  | 1.301158  |
| 1 | 2.639673  | 6.442244  | 0.483274  | 1  | 6.761591  | 1.456462  | 0.666184  |
| 1 | 1.083925  | 6.800858  | 2.387723  | 6  | 1.913855  | -1.448357 | -0.860256 |
| 1 | -5.200423 | 0.217423  | 4.875471  | 6  | 2.507494  | -2.020571 | -2.017361 |
| 6 | -4.021974 | -0.489392 | -1.782959 | 1  | -0.107221 | 2.296277  | 2.374284  |
| 6 | -5.407311 | -0.722194 | -1.846061 | 1  | 1.922670  | -2.689032 | -2.637102 |
| 6 | -3.213702 | -1.207889 | -2.678466 | 15 | 0.535529  | 1.744840  | -0.388549 |
| 6 | -5.951932 | -1.668624 | -2.716478 | 15 | 0.081726  | -1.655072 | -0.592577 |
| 1 | -6.080557 | -0.154815 | -1.208130 | 6  | 1.975160  | 1.966813  | -1.512507 |
| 6 | -3.744003 | -2.153253 | -3.555370 | 6  | 3.104228  | 2.723459  | -1.177418 |
| 1 | -2.144141 | -1.021315 | -2.670040 | 6  | 1.910118  | 1.359564  | -2.774586 |
| 6 | -5.118324 | -2.397282 | -3.566284 | 6  | 4.160911  | 2.846385  | -2.076513 |
| 1 | -7.026402 | -1.835481 | -2.733507 | 1  | 3.165881  | 3.205862  | -0.207895 |
| 1 | -3.086470 | -2.706744 | -4.221182 | 6  | 2.967951  | 1.481333  | -3.674299 |
| 1 | -5.537799 | -3.141175 | -4.238806 | 1  | 1.025423  | 0.784783  | -3.045600 |
| 1 | -2.170774 | 5.086661  | -0.076548 | 6  | 4.098249  | 2.220163  | -3.322946 |

**INT19a**

|   |          |           |          |   |           |          |           |
|---|----------|-----------|----------|---|-----------|----------|-----------|
| 6 | 3.839731 | -2.153423 | 3.764967 | 1 | 2.910801  | 0.994279 | -4.643452 |
| 6 | 3.484197 | -1.614356 | 2.549199 | 1 | 4.929075  | 2.308546 | -4.016932 |
| 6 | 2.515174 | -0.577524 | 2.460066 | 6 | 0.129175  | 3.488128 | 0.021475  |
| 6 | 1.913359 | -0.114405 | 3.672089 | 6 | -0.909595 | 4.100528 | -0.687483 |
| 6 | 2.286127 | -0.702628 | 4.907669 | 6 | 0.871909  | 4.249629 | 0.938215  |
| 6 | 3.233063 | -1.699483 | 4.958505 | 6 | -1.204682 | 5.448349 | -0.483264 |
| 1 | 4.587153 | -2.940701 | 3.806642 | 1 | -1.490042 | 3.509847 | -1.386384 |
|   |          |           |          | 6 | 0.570780  | 5.593969 | 1.145895  |

|    |           |           |           |               |           |           |           |
|----|-----------|-----------|-----------|---------------|-----------|-----------|-----------|
| 1  | 1.675417  | 3.789739  | 1.504386  | 6             | -4.148975 | 4.214759  | 0.729149  |
| 6  | -0.468722 | 6.197005  | 0.433895  | 1             | -4.562239 | 3.120730  | -1.064386 |
| 1  | -2.023233 | 5.905625  | -1.030691 | 6             | -2.801829 | 3.086628  | 2.378025  |
| 1  | 1.148616  | 6.170875  | 1.862854  | 1             | -2.169092 | 1.102888  | 1.880408  |
| 1  | -0.704980 | 7.244633  | 0.598698  | 6             | -3.509589 | 4.218047  | 1.968815  |
| 6  | -0.017776 | -2.200723 | 1.152454  | 1             | -4.700322 | 5.091832  | 0.399482  |
| 6  | 0.852498  | -3.173374 | 1.668153  | 1             | -2.299801 | 3.078503  | 3.342771  |
| 6  | -0.994621 | -1.650000 | 1.985469  | 1             | -3.557183 | 5.095304  | 2.607937  |
| 6  | 0.734028  | -3.592141 | 2.990766  | 6             | -4.482024 | 0.615573  | -2.254884 |
| 1  | 1.636501  | -3.584330 | 1.039188  | 1             | -4.239188 | 1.502074  | -2.854941 |
| 6  | -1.113236 | -2.068338 | 3.309752  | 1             | -4.332090 | -0.255846 | -2.903636 |
| 1  | -1.669489 | -0.907050 | 1.587997  | 6             | -5.886473 | 0.655946  | -1.738453 |
| 6  | -0.249074 | -3.038940 | 3.814934  | 1             | -6.245026 | 1.622706  | -1.384463 |
| 1  | 1.424360  | -4.331135 | 3.385642  | 6             | -6.695073 | -0.400921 | -1.617704 |
| 1  | -1.884407 | -1.634366 | 3.938889  | 1             | -6.381946 | -1.395003 | -1.929636 |
| 1  | -0.333776 | -3.361684 | 4.848666  | 1             | -7.690188 | -0.313461 | -1.190375 |
| 6  | -0.325454 | -3.179814 | -1.551367 | 1             | -1.619187 | 1.534364  | -2.244178 |
| 6  | -0.524897 | -3.042168 | -2.935365 |               |           |           |           |
| 6  | -0.518173 | -4.437343 | -0.967128 |               |           |           |           |
| 6  | -0.878025 | -4.139365 | -3.718311 |               |           |           |           |
| 1  | -0.433107 | -2.060421 | -3.390230 |               |           |           |           |
| 6  | -0.888316 | -5.533352 | -1.749805 |               |           |           |           |
| 1  | -0.407821 | -4.562325 | 0.102849  |               |           |           |           |
| 6  | -1.063446 | -5.390755 | -3.125794 |               |           |           |           |
| 1  | -1.026048 | -4.012530 | -4.787058 |               |           |           |           |
| 1  | -1.044814 | -6.499231 | -1.277271 |               |           |           |           |
| 1  | -1.353809 | -6.244361 | -3.731729 |               |           |           |           |
| 45 | -0.975703 | 0.293556  | -1.460396 |               |           |           |           |
| 1  | -1.934263 | -0.626127 | -2.356755 |               |           |           |           |
| 14 | -3.181324 | 0.440780  | -0.856160 |               |           |           |           |
| 6  | -3.702339 | -1.096675 | 0.121810  |               |           |           |           |
| 6  | -4.358014 | -1.009435 | 1.361796  |               |           |           |           |
| 6  | -3.426340 | -2.380263 | -0.379251 |               |           |           |           |
| 6  | -4.688382 | -2.154999 | 2.088175  |               |           |           |           |
| 1  | -4.603268 | -0.034083 | 1.771427  |               |           |           |           |
| 6  | -3.757683 | -3.529555 | 0.337755  |               |           |           |           |
| 1  | -2.924359 | -2.482713 | -1.335616 |               |           |           |           |
| 6  | -4.380056 | -3.419098 | 1.582254  |               |           |           |           |
| 1  | -5.187474 | -2.060983 | 3.049711  |               |           |           |           |
| 1  | -3.514186 | -4.506871 | -0.070197 |               |           |           |           |
| 1  | -4.626563 | -4.311077 | 2.152356  |               |           |           |           |
| 6  | -3.369769 | 1.938723  | 0.294094  |               |           |           |           |
| 6  | -4.073835 | 3.090164  | -0.094543 |               |           |           |           |
| 6  | -2.735839 | 1.967394  | 1.548845  |               |           |           |           |
|    |           |           |           | <b>INT20a</b> |           |           |           |
|    |           |           |           | 45            | 0.434187  | 0.615406  | -0.924108 |
|    |           |           |           | 6             | 1.555124  | -1.273580 | -2.817331 |
|    |           |           |           | 6             | 1.552173  | 0.252773  | -2.665610 |
|    |           |           |           | 6             | 1.566374  | -2.004913 | -1.456436 |
|    |           |           |           | 1             | 0.661752  | -1.579410 | -3.377147 |
|    |           |           |           | 1             | 2.415190  | -1.614832 | -3.412838 |
|    |           |           |           | 1             | 1.134010  | 0.726821  | -3.555504 |
|    |           |           |           | 1             | 2.566043  | 0.633573  | -2.537715 |
|    |           |           |           | 1             | 0.696741  | -1.689525 | -0.845958 |
|    |           |           |           | 1             | 1.405273  | -3.080447 | -1.599990 |
|    |           |           |           | 14            | 3.102168  | -1.741155 | -0.405924 |
|    |           |           |           | 6             | 2.980955  | -2.849858 | 1.117361  |
|    |           |           |           | 6             | 1.805639  | -3.553092 | 1.430026  |
|    |           |           |           | 6             | 4.068067  | -2.970366 | 2.002874  |
|    |           |           |           | 6             | 1.713817  | -4.344158 | 2.576203  |
|    |           |           |           | 1             | 0.938580  | -3.477680 | 0.781267  |
|    |           |           |           | 6             | 3.986626  | -3.762413 | 3.149092  |
|    |           |           |           | 1             | 4.997150  | -2.446974 | 1.787096  |
|    |           |           |           | 6             | 2.805548  | -4.451574 | 3.437868  |
|    |           |           |           | 1             | 0.785704  | -4.863244 | 2.795202  |
|    |           |           |           | 1             | 4.841952  | -3.843652 | 3.815194  |
|    |           |           |           | 6             | -2.553280 | -4.164088 | 2.981574  |
|    |           |           |           | 6             | -2.716058 | -2.996082 | 2.273740  |
|    |           |           |           | 6             | -2.314081 | -2.900790 | 0.913352  |
|    |           |           |           | 6             | -1.758374 | -4.063239 | 0.290603  |



|    |           |           |           |   |           |           |           |
|----|-----------|-----------|-----------|---|-----------|-----------|-----------|
| 6  | -1.613403 | -5.258529 | 1.042497  | 6 | -1.345354 | 0.490887  | -6.036285 |
| 6  | -1.999074 | -5.309871 | 2.362366  | 1 | -0.626287 | 1.426402  | -4.238243 |
| 1  | -2.850206 | -4.207107 | 4.025207  | 6 | -2.709684 | -1.475779 | -5.727796 |
| 1  | -3.142564 | -2.126056 | 2.754730  | 1 | -3.065073 | -2.073825 | -3.697556 |
| 6  | -2.452494 | -1.686354 | 0.163210  | 6 | -2.094640 | -0.554610 | -6.577341 |
| 6  | -1.366740 | -3.982292 | -1.067601 | 1 | -0.877975 | 1.223246  | -6.688300 |
| 1  | -1.183982 | -6.129907 | 0.555311  | 1 | -3.313095 | -2.279826 | -6.140038 |
| 1  | -1.879859 | -6.227420 | 2.931418  | 1 | -2.208657 | -0.644773 | -7.653789 |
| 6  | -1.460057 | -2.799934 | -1.756018 | 6 | -0.329912 | -0.070238 | 2.636800  |
| 6  | -1.995070 | -1.623527 | -1.154924 | 6 | -1.216860 | -0.368326 | 3.684460  |
| 1  | -0.955012 | -4.863814 | -1.552009 | 6 | 1.003289  | -0.484206 | 2.734023  |
| 6  | -7.486408 | -1.048332 | 0.841908  | 6 | -0.774825 | -1.075012 | 4.800987  |
| 6  | -6.913959 | 0.104498  | 1.325964  | 1 | -2.249355 | -0.039445 | 3.629665  |
| 6  | -5.505868 | 0.278194  | 1.314154  | 6 | 1.444890  | -1.185916 | 3.855970  |
| 6  | -4.664435 | -0.762056 | 0.812310  | 1 | 1.694890  | -0.257458 | 1.933151  |
| 6  | -5.292104 | -1.941412 | 0.318883  | 6 | 0.557597  | -1.487395 | 4.887049  |
| 6  | -6.662103 | -2.077886 | 0.329689  | 1 | -1.471357 | -1.304794 | 5.603045  |
| 1  | -5.538994 | 2.280432  | 2.128052  | 1 | 2.475781  | -1.518515 | 3.902266  |
| 1  | -8.565633 | -1.170692 | 0.847805  | 1 | 0.899813  | -2.047613 | 5.752748  |
| 1  | -7.531519 | 0.910366  | 1.714235  | 6 | -0.813382 | 2.645581  | 1.862162  |
| 6  | -4.905582 | 1.480918  | 1.752483  | 6 | -0.998277 | 3.717118  | 0.980169  |
| 6  | -3.239217 | -0.565098 | 0.763696  | 6 | -0.728824 | 2.913820  | 3.235709  |
| 1  | -4.681910 | -2.740346 | -0.082812 | 6 | -1.114605 | 5.024064  | 1.453462  |
| 1  | -7.114424 | -2.985875 | -0.058685 | 1 | -1.068573 | 3.522278  | -0.081121 |
| 6  | -2.682256 | 0.632156  | 1.202487  | 6 | -0.841809 | 4.220246  | 3.710814  |
| 6  | -3.547013 | 1.651358  | 1.695091  | 1 | -0.578156 | 2.101432  | 3.936996  |
| 1  | -1.089984 | -2.753647 | -2.771779 | 6 | -1.041907 | 5.279087  | 2.823264  |
| 1  | -3.128133 | 2.587074  | 2.035073  | 1 | -1.254533 | 5.840144  | 0.750345  |
| 15 | -1.637981 | -0.013392 | -1.986112 | 1 | -0.768695 | 4.410139  | 4.777845  |
| 15 | -0.833974 | 0.927854  | 1.176673  | 1 | -1.128201 | 6.295792  | 3.195613  |
| 6  | -3.112736 | 1.079305  | -1.873615 | 1 | 2.738291  | -5.066542 | 4.331683  |
| 6  | -4.422591 | 0.594608  | -1.964318 | 6 | 4.641976  | -2.244427 | -1.369305 |
| 6  | -2.895445 | 2.460327  | -1.826084 | 6 | 5.244840  | -3.504957 | -1.219683 |
| 6  | -5.499740 | 1.477434  | -1.949352 | 6 | 5.196700  | -1.361132 | -2.312944 |
| 1  | -4.602889 | -0.473009 | -2.026785 | 6 | 6.356498  | -3.870612 | -1.980934 |
| 6  | -3.973181 | 3.346259  | -1.826679 | 1 | 4.845674  | -4.206376 | -0.491568 |
| 1  | -1.877050 | 2.832403  | -1.796125 | 6 | 6.306286  | -1.720075 | -3.078257 |
| 6  | -5.277730 | 2.854926  | -1.875430 | 1 | 4.754159  | -0.378038 | -2.446974 |
| 1  | -6.512526 | 1.086963  | -1.984570 | 6 | 6.889598  | -2.977911 | -2.912333 |
| 1  | -3.792164 | 4.416661  | -1.782367 | 1 | 6.808344  | -4.850133 | -1.845693 |
| 1  | -6.119674 | 3.541316  | -1.862203 | 1 | 6.718070  | -1.018540 | -3.799277 |
| 6  | -1.780046 | -0.338759 | -3.794625 | 1 | 7.756668  | -3.259787 | -3.504105 |
| 6  | -1.192147 | 0.600215  | -4.654755 | 6 | 2.326528  | 1.055252  | -0.138797 |
| 6  | -2.562494 | -1.363721 | -4.345483 | 6 | 3.237691  | 0.060149  | 0.032931  |

|               |           |           |           |    |           |           |           |
|---------------|-----------|-----------|-----------|----|-----------|-----------|-----------|
| 14            | 2.963950  | 2.782936  | 0.340921  | 1  | 6.041183  | -2.673876 | 3.844522  |
| 6             | 4.867459  | 2.850397  | 0.060345  | 1  | 7.079464  | -4.300976 | 2.276904  |
| 1             | 5.254359  | 2.010498  | 0.654737  | 1  | 6.857255  | -3.965858 | -0.176666 |
| 6             | 2.655554  | 2.879390  | 2.239306  | 1  | 5.599539  | -2.039698 | -1.053685 |
| 1             | 1.681662  | 2.395959  | 2.367035  | 14 | 4.067204  | 0.205222  | 0.269371  |
| 6             | 2.052033  | 4.133648  | -0.668158 | 8  | 2.981257  | 0.510964  | 1.505183  |
| 1             | 1.004563  | 3.985332  | -0.384452 | 1  | 2.145763  | 0.929236  | 1.171234  |
| 6             | 5.299574  | 2.603215  | -1.394230 | 1  | 1.395925  | 2.197345  | -0.418069 |
| 1             | 4.791322  | 1.736414  | -1.826933 | 6  | -5.710829 | -0.184523 | 3.133461  |
| 1             | 5.077518  | 3.469057  | -2.027644 | 6  | -4.908727 | -0.172334 | 2.015266  |
| 1             | 6.382002  | 2.424447  | -1.458909 | 6  | -3.662134 | -0.857252 | 1.997227  |
| 6             | 5.546398  | 4.117750  | 0.608874  | 6  | -3.268978 | -1.570248 | 3.173142  |
| 1             | 5.317156  | 4.288073  | 1.665676  | 6  | -4.110834 | -1.552609 | 4.315406  |
| 1             | 6.639450  | 4.043402  | 0.517233  | 6  | -5.307901 | -0.875114 | 4.300563  |
| 1             | 5.238792  | 5.012773  | 0.057718  | 1  | -6.658790 | 0.346083  | 3.122385  |
| 6             | 3.670774  | 2.020238  | 3.014373  | 1  | -5.222334 | 0.371361  | 1.132441  |
| 1             | 4.673569  | 2.463353  | 2.997462  | 6  | -2.788458 | -0.829874 | 0.860718  |
| 1             | 3.371236  | 1.929548  | 4.067609  | 6  | -2.045918 | -2.282601 | 3.161164  |
| 1             | 3.747205  | 1.007194  | 2.606980  | 1  | -3.790041 | -2.091147 | 5.203511  |
| 6             | 2.543697  | 4.274453  | 2.870639  | 1  | -5.946138 | -0.870857 | 5.179545  |
| 1             | 1.714389  | 4.844078  | 2.446134  | 6  | -1.241455 | -2.281340 | 2.049432  |
| 1             | 2.361432  | 4.195735  | 3.951904  | 6  | -1.590388 | -1.543371 | 0.886803  |
| 1             | 3.460541  | 4.860906  | 2.738563  | 1  | -1.753351 | -2.840783 | 4.046980  |
| 6             | 2.146234  | 3.907897  | -2.189868 | 6  | -6.283407 | -1.621177 | -2.845426 |
| 1             | 1.431636  | 4.556032  | -2.719004 | 6  | -5.674732 | -0.431325 | -3.171294 |
| 1             | 3.143394  | 4.160654  | -2.565208 | 6  | -4.661714 | 0.119185  | -2.344402 |
| 1             | 1.932685  | 2.874906  | -2.472175 | 6  | -4.256785 | -0.579339 | -1.163937 |
| 6             | 2.406013  | 5.596844  | -0.354327 | 6  | -4.905190 | -1.808595 | -0.860400 |
| 1             | 2.330594  | 5.836600  | 0.708419  | 6  | -5.894443 | -2.311691 | -1.674228 |
| 1             | 3.425372  | 5.836863  | -0.676178 | 1  | -4.347470 | 1.889730  | -3.545721 |
| 1             | 1.733793  | 6.277533  | -0.897125 | 1  | -7.060842 | -2.031846 | -3.483362 |
| 1             | 4.230382  | 0.316041  | 0.424481  | 1  | -5.962617 | 0.111159  | -4.068265 |
| 1             | 0.269514  | 2.080803  | -1.292126 | 6  | -4.036124 | 1.350841  | -2.654301 |
|               |           |           |           | 6  | -3.209400 | -0.041216 | -0.342428 |
|               |           |           |           | 1  | -4.606537 | -2.355791 | 0.025098  |
| <b>INT21a</b> |           |           |           | 1  | -6.374944 | -3.252047 | -1.419126 |
| 45            | 0.682777  | 0.747720  | -0.475722 | 6  | -2.619582 | 1.178947  | -0.677385 |
| 15            | -0.348391 | -1.349128 | -0.474596 | 6  | -3.057114 | 1.866231  | -1.843454 |
| 15            | -1.107009 | 1.826414  | 0.189505  | 1  | -0.318975 | -2.847906 | 2.061558  |
| 6             | 5.097644  | -1.232714 | 0.888250  | 1  | -2.601041 | 2.814358  | -2.100241 |
| 6             | 5.238383  | -1.437520 | 2.272251  | 6  | -1.535032 | 1.742405  | 1.971332  |
| 6             | 5.947508  | -2.531138 | 2.771061  | 6  | -2.788045 | 2.143748  | 2.457413  |
| 6             | 6.531174  | -3.445729 | 1.890757  | 6  | -0.584261 | 1.240452  | 2.869071  |
| 6             | 6.407776  | -3.256473 | 0.513240  | 6  | -3.077650 | 2.061897  | 3.817423  |
| 6             | 5.698892  | -2.159449 | 0.021752  |    |           |           |           |

|   |           |           |           |               |           |           |           |
|---|-----------|-----------|-----------|---------------|-----------|-----------|-----------|
| 1 | -3.552190 | 2.484421  | 1.765747  | 6             | 5.345834  | 4.046793  | -0.695405 |
| 6 | -0.879827 | 1.147061  | 4.228874  | 1             | 3.478739  | 3.045101  | -0.332152 |
| 1 | 0.376116  | 0.907323  | 2.489367  | 6             | 7.337964  | 2.697085  | -0.474203 |
| 6 | -2.124707 | 1.559926  | 4.705281  | 1             | 7.027636  | 0.640350  | 0.067440  |
| 1 | -4.058423 | 2.355766  | 4.177762  | 6             | 6.736773  | 3.926073  | -0.748756 |
| 1 | -0.138423 | 0.743752  | 4.912605  | 1             | 4.873871  | 5.003474  | -0.904392 |
| 1 | -2.358299 | 1.479477  | 5.763051  | 1             | 8.420012  | 2.599769  | -0.510795 |
| 6 | -1.142892 | 3.629416  | -0.215907 | 1             | 7.349207  | 4.787929  | -1.001018 |
| 6 | -1.774668 | 4.594947  | 0.576554  | 6             | 3.134667  | -0.250798 | -1.319507 |
| 6 | -0.506590 | 4.038051  | -1.399382 | 1             | 2.708922  | -1.251973 | -1.226787 |
| 6 | -1.782032 | 5.936511  | 0.187561  | 1             | 2.299059  | 0.496336  | -1.454533 |
| 1 | -2.244939 | 4.313597  | 1.510530  | 6             | 3.899886  | -0.135152 | -2.649897 |
| 6 | -0.530435 | 5.373282  | -1.796223 | 1             | 4.747483  | -0.833396 | -2.646668 |
| 1 | 0.025812  | 3.297572  | -1.988792 | 1             | 4.330454  | 0.868857  | -2.739596 |
| 6 | -1.169303 | 6.328488  | -1.001739 | 6             | 2.999426  | -0.430461 | -3.852255 |
| 1 | -2.265960 | 6.674690  | 0.821223  | 1             | 3.547528  | -0.352464 | -4.798404 |
| 1 | -0.035187 | 5.670397  | -2.716562 | 1             | 2.574427  | -1.439367 | -3.785100 |
| 1 | -1.177111 | 7.372534  | -1.302287 | 1             | 2.161667  | 0.277353  | -3.884874 |
| 6 | 0.815382  | -2.755362 | -0.231899 |               |           |           |           |
| 6 | 0.863986  | -3.869584 | -1.080286 |               |           |           |           |
| 6 | 1.774338  | -2.640942 | 0.791910  | <b>INT22a</b> |           |           |           |
| 6 | 1.835413  | -4.856480 | -0.896295 | 45            | 0.935885  | 0.541965  | -0.720312 |
| 1 | 0.152938  | -3.965423 | -1.892511 | 15            | -0.287290 | -1.475524 | -0.382980 |
| 6 | 2.731125  | -3.635870 | 0.983616  | 15            | -0.842069 | 1.845230  | 0.011158  |
| 1 | 1.798347  | -1.750198 | 1.413420  | 6             | 4.693403  | -1.342015 | 0.719826  |
| 6 | 2.764348  | -4.746345 | 0.137891  | 6             | 4.967382  | -1.377879 | 2.097002  |
| 1 | 1.863690  | -5.710774 | -1.567429 | 6             | 5.749639  | -2.391762 | 2.651237  |
| 1 | 3.471536  | -3.524192 | 1.767870  | 6             | 6.280324  | -3.390175 | 1.829335  |
| 1 | 3.525415  | -5.508957 | 0.275722  | 6             | 6.024321  | -3.368604 | 0.457125  |
| 6 | -1.284505 | -1.787647 | -1.986837 | 6             | 5.235216  | -2.354419 | -0.087302 |
| 6 | -2.133538 | -2.900034 | -2.064314 | 1             | 5.946672  | -2.405889 | 3.720259  |
| 6 | -1.161033 | -0.939049 | -3.094958 | 1             | 6.889357  | -4.181640 | 2.258213  |
| 6 | -2.846341 | -3.159845 | -3.232726 | 1             | 6.429797  | -4.146418 | -0.184576 |
| 1 | -2.255006 | -3.545894 | -1.199438 | 1             | 5.018325  | -2.360872 | -1.152973 |
| 6 | -1.880478 | -1.196257 | -4.261638 | 14            | 3.648254  | 0.018843  | -0.046302 |
| 1 | -0.521029 | -0.064147 | -3.012645 | 8             | 2.442014  | 0.401286  | 1.149709  |
| 6 | -2.724632 | -2.305422 | -4.330848 | 1             | 2.528571  | 1.316594  | 1.457198  |
| 1 | -3.517645 | -4.012019 | -3.277998 | 1             | 1.704304  | 1.855929  | -1.164009 |
| 1 | -1.792992 | -0.522898 | -5.109645 | 6             | -5.430466 | 0.465866  | 3.238704  |
| 1 | -3.295988 | -2.499749 | -5.233953 | 6             | -4.657964 | 0.319008  | 2.109423  |
| 1 | 4.765930  | -0.743695 | 2.961907  | 6             | -3.471519 | -0.466051 | 2.125913  |
| 6 | 5.148989  | 1.692315  | -0.092429 | 6             | -3.106050 | -1.103210 | 3.352895  |
| 6 | 4.560884  | 2.940781  | -0.370707 | 6             | -3.914787 | -0.921644 | 4.504843  |
| 6 | 6.548604  | 1.592189  | -0.148772 | 6             | -5.055434 | -0.154749 | 4.453256  |
|   |           |           |           | 1             | -6.332460 | 1.070132  | 3.199200  |

|   |           |           |           |   |           |           |           |
|---|-----------|-----------|-----------|---|-----------|-----------|-----------|
| 1 | -4.949063 | 0.811609  | 1.189908  | 1 | -1.179138 | 6.839075  | 0.454140  |
| 6 | -2.634897 | -0.615215 | 0.969700  | 1 | 0.324159  | 5.336577  | -3.284895 |
| 6 | -1.943431 | -1.908887 | 3.379235  | 1 | -0.313270 | 7.262401  | -1.839032 |
| 1 | -3.614667 | -1.407311 | 5.429968  | 6 | 0.763634  | -2.940541 | -0.009984 |
| 1 | -5.669914 | -0.025678 | 5.339716  | 6 | 0.728202  | -4.123301 | -0.760709 |
| 6 | -1.170617 | -2.066750 | 2.256091  | 6 | 1.720246  | -2.819098 | 1.012771  |
| 6 | -1.490602 | -1.413644 | 1.035464  | 6 | 1.607756  | -5.169615 | -0.474289 |
| 1 | -1.672542 | -2.412760 | 4.303808  | 1 | 0.020140  | -4.229842 | -1.573808 |
| 6 | -6.364217 | -1.485809 | -2.487766 | 6 | 2.583961  | -3.871083 | 1.308517  |
| 6 | -5.679806 | -0.390791 | -2.961624 | 1 | 1.804712  | -1.888223 | 1.564508  |
| 6 | -4.585387 | 0.152648  | -2.240115 | 6 | 2.529517  | -5.050871 | 0.565329  |
| 6 | -4.173740 | -0.458360 | -1.014260 | 1 | 1.569856  | -6.077811 | -1.069891 |
| 6 | -4.899491 | -1.594199 | -0.559764 | 1 | 3.326168  | -3.750134 | 2.090080  |
| 6 | -5.969853 | -2.087156 | -1.270353 | 1 | 3.217537  | -5.862671 | 0.783583  |
| 1 | -4.206481 | 1.771682  | -3.623052 | 6 | -1.357955 | -2.059858 | -1.754627 |
| 1 | -7.205437 | -1.889440 | -3.044078 | 6 | -2.258891 | -3.116863 | -1.554589 |
| 1 | -5.970863 | 0.083535  | -3.895486 | 6 | -1.302321 | -1.441823 | -3.008585 |
| 6 | -3.891913 | 1.300056  | -2.695354 | 6 | -3.092628 | -3.539524 | -2.586420 |
| 6 | -3.053789 | 0.078893  | -0.292275 | 1 | -2.320268 | -3.593365 | -0.580576 |
| 1 | -4.597357 | -2.076985 | 0.361110  | 6 | -2.145791 | -1.858977 | -4.038545 |
| 1 | -6.509334 | -2.953649 | -0.898326 | 1 | -0.611173 | -0.622974 | -3.162601 |
| 6 | -2.412573 | 1.226573  | -0.760360 | 6 | -3.044445 | -2.904501 | -3.829300 |
| 6 | -2.851579 | 1.826322  | -1.972114 | 1 | -3.799027 | -4.345839 | -2.413326 |
| 1 | -0.298978 | -2.706274 | 2.302452  | 1 | -2.105193 | -1.357626 | -5.001426 |
| 1 | -2.352625 | 2.717502  | -2.332628 | 1 | -3.710774 | -3.220478 | -4.626719 |
| 6 | -1.248477 | 1.955203  | 1.797210  | 1 | 4.550740  | -0.610317 | 2.745027  |
| 6 | -2.418389 | 2.566891  | 2.271266  | 6 | 4.730579  | 1.552656  | -0.181509 |
| 6 | -0.365369 | 1.370462  | 2.714581  | 6 | 4.198933  | 2.853844  | -0.267620 |
| 6 | -2.687692 | 2.613854  | 3.637088  | 6 | 6.130670  | 1.417570  | -0.191795 |
| 1 | -3.134024 | 2.979562  | 1.566622  | 6 | 5.030465  | 3.970289  | -0.360755 |
| 6 | -0.642070 | 1.408449  | 4.081374  | 1 | 3.121415  | 2.993572  | -0.288536 |
| 1 | 0.513483  | 0.849761  | 2.349644  | 6 | 6.966346  | 2.530268  | -0.294698 |
| 6 | -1.799936 | 2.033727  | 4.544999  | 1 | 6.574114  | 0.428694  | -0.111760 |
| 1 | -3.605798 | 3.073034  | 3.990265  | 6 | 6.417214  | 3.810728  | -0.377320 |
| 1 | 0.039475  | 0.933485  | 4.781491  | 1 | 4.594392  | 4.963812  | -0.426258 |
| 1 | -2.021049 | 2.054116  | 5.608161  | 1 | 8.045184  | 2.398286  | -0.304269 |
| 6 | -0.726320 | 3.607349  | -0.534796 | 1 | 7.066180  | 4.679273  | -0.453465 |
| 6 | -1.068124 | 4.698909  | 0.274116  | 6 | 2.670724  | -0.444677 | -1.539526 |
| 6 | -0.207334 | 3.860363  | -1.817490 | 1 | 2.492703  | -1.526638 | -1.578562 |
| 6 | -0.916109 | 6.006719  | -0.193001 | 1 | 0.348331  | 0.700354  | -2.127128 |
| 1 | -1.437491 | 4.538923  | 1.279328  | 6 | 3.222049  | 0.027099  | -2.889512 |
| 6 | -0.074569 | 5.164524  | -2.288958 | 1 | 4.165967  | -0.500402 | -3.112816 |
| 1 | 0.116977  | 3.027348  | -2.430986 | 1 | 3.475142  | 1.093037  | -2.838725 |
| 6 | -0.428950 | 6.244587  | -1.477026 | 6 | 2.271884  | -0.204086 | -4.067906 |

|              |           |           |           |    |           |           |           |
|--------------|-----------|-----------|-----------|----|-----------|-----------|-----------|
| 1            | 2.754396  | 0.031259  | -5.025237 | 6  | -4.642099 | 1.582290  | 0.628355  |
| 1            | 1.938106  | -1.249220 | -4.103414 | 6  | -3.849468 | 0.442952  | 0.966930  |
| 1            | 1.380764  | 0.424486  | -3.966542 | 6  | -4.527419 | -0.775337 | 1.253963  |
|              |           |           |           | 6  | -5.899988 | -0.858896 | 1.192237  |
| <b>INT2a</b> |           |           |           | 1  | -4.578632 | 3.675309  | 0.089702  |
| 45           | 1.036827  | 0.298163  | -1.493520 | 1  | -7.759469 | 0.195111  | 0.811057  |
| 17           | 2.622255  | 2.065807  | -1.819727 | 1  | -6.636501 | 2.350710  | 0.320303  |
| 6            | 2.438567  | -2.040143 | -3.212127 | 6  | -3.984247 | 2.794913  | 0.320218  |
| 6            | 1.920028  | -0.584498 | -3.206918 | 6  | -2.413788 | 0.534114  | 0.940502  |
| 6            | 2.556156  | -2.638334 | -1.796420 | 1  | -3.950482 | -1.656037 | 1.506314  |
| 1            | 1.802622  | -2.681900 | -3.829811 | 1  | -6.391145 | -1.804182 | 1.404703  |
| 1            | 3.427822  | -2.057017 | -3.688316 | 6  | -1.797772 | 1.726696  | 0.560548  |
| 1            | 1.151349  | -0.411600 | -3.973905 | 6  | -2.616439 | 2.860605  | 0.281425  |
| 1            | 2.733533  | 0.107749  | -3.428398 | 1  | 0.051930  | -3.407583 | 0.210824  |
| 1            | 1.664543  | -3.240380 | -1.574734 | 1  | -2.149986 | 3.797815  | 0.015319  |
| 1            | 3.419788  | -3.308234 | -1.699699 | 15 | -0.748869 | -1.111565 | -1.315023 |
| 14           | 2.593794  | -1.195468 | -0.560448 | 15 | 0.019643  | 1.857542  | 0.158724  |
| 6            | 2.394058  | -1.925472 | 1.179894  | 6  | -2.268759 | -0.291359 | -1.965778 |
| 6            | 2.004173  | -1.208761 | 2.319709  | 6  | -3.526804 | -0.897418 | -1.850181 |
| 6            | 2.818474  | -3.254971 | 1.366021  | 6  | -2.152566 | 0.905049  | -2.678583 |
| 6            | 2.042383  | -1.778951 | 3.591220  | 6  | -4.652687 | -0.291368 | -2.399529 |
| 1            | 1.650211  | -0.196058 | 2.217465  | 1  | -3.627924 | -1.837310 | -1.318609 |
| 6            | 2.854084  | -3.837031 | 2.634072  | 6  | -3.278368 | 1.510886  | -3.237671 |
| 1            | 3.133221  | -3.848157 | 0.512074  | 1  | -1.176578 | 1.365993  | -2.790857 |
| 6            | 2.468265  | -3.097365 | 3.754104  | 6  | -4.531364 | 0.916474  | -3.091652 |
| 1            | 1.721066  | -1.193856 | 4.447712  | 1  | -5.626614 | -0.754454 | -2.274765 |
| 1            | 3.189151  | -4.865177 | 2.748036  | 1  | -3.173303 | 2.446574  | -3.779204 |
| 6            | -2.365250 | -0.596219 | 5.051335  | 1  | -5.411597 | 1.389611  | -3.517354 |
| 6            | -2.335398 | -0.230659 | 3.725109  | 6  | -0.996743 | -2.690093 | -2.253774 |
| 6            | -1.732595 | -1.066512 | 2.742491  | 6  | -0.716037 | -2.652960 | -3.628048 |
| 6            | -1.190271 | -2.317621 | 3.171240  | 6  | -1.633330 | -3.826956 | -1.734392 |
| 6            | -1.240808 | -2.671098 | 4.544997  | 6  | -1.010060 | -3.739636 | -4.448638 |
| 6            | -1.808943 | -1.828545 | 5.470679  | 1  | -0.281310 | -1.761451 | -4.061466 |
| 1            | -2.824416 | 0.063914  | 5.781577  | 6  | -1.924787 | -4.916862 | -2.556288 |
| 1            | -2.781591 | 0.707682  | 3.418301  | 1  | -1.917698 | -3.868453 | -0.690400 |
| 6            | -1.675467 | -0.701354 | 1.351784  | 6  | -1.605203 | -4.882629 | -3.912905 |
| 6            | -0.584729 | -3.164832 | 2.214457  | 1  | -0.775481 | -3.689446 | -5.508018 |
| 1            | -0.804133 | -3.618307 | 4.849254  | 1  | -2.410609 | -5.790636 | -2.130965 |
| 1            | -1.835592 | -2.104660 | 6.520798  | 1  | -1.831402 | -5.732425 | -4.550434 |
| 6            | -0.486503 | -2.776876 | 0.905344  | 6  | 0.892695  | 1.979163  | 1.762862  |
| 6            | -1.060891 | -1.558340 | 0.442710  | 6  | 0.235266  | 1.875899  | 2.991792  |
| 1            | -0.130777 | -4.094169 | 2.541143  | 6  | 2.286690  | 2.156937  | 1.731769  |
| 6            | -6.677019 | 0.274040  | 0.854497  | 6  | 0.963118  | 1.907734  | 4.182950  |
| 6            | -6.055613 | 1.470660  | 0.583872  | 1  | -0.839496 | 1.758348  | 3.021468  |

|              |           |           |           |    |           |           |           |
|--------------|-----------|-----------|-----------|----|-----------|-----------|-----------|
| 6            | 3.004133  | 2.211344  | 2.923958  | 6  | -3.232803 | -1.771117 | -1.045851 |
| 1            | 2.800129  | 2.225971  | 0.777626  | 6  | -4.510242 | -1.545824 | -1.580626 |
| 6            | 2.348152  | 2.073312  | 4.150968  | 6  | -2.611872 | -3.013556 | -1.244905 |
| 1            | 0.442818  | 1.799016  | 5.130453  | 6  | -5.156268 | -2.548448 | -2.304297 |
| 1            | 4.082215  | 2.336943  | 2.889135  | 1  | -4.993890 | -0.584527 | -1.439428 |
| 1            | 2.915653  | 2.093642  | 5.077116  | 6  | -3.264588 | -4.014067 | -1.965077 |
| 6            | 0.116916  | 3.606767  | -0.418719 | 1  | -1.629061 | -3.189884 | -0.819149 |
| 6            | -0.030186 | 3.904558  | -1.779699 | 6  | -4.534524 | -3.783645 | -2.497468 |
| 6            | 0.269703  | 4.659837  | 0.491746  | 1  | -6.144350 | -2.364007 | -2.716922 |
| 6            | -0.042736 | 5.225626  | -2.220054 | 1  | -2.777756 | -4.974114 | -2.111812 |
| 1            | -0.102220 | 3.102657  | -2.503496 | 1  | -5.038321 | -4.563111 | -3.062407 |
| 6            | 0.266963  | 5.984016  | 0.050212  | 6  | -3.036465 | 1.090577  | -0.625309 |
| 1            | 0.387643  | 4.447359  | 1.548709  | 6  | -3.330802 | 2.104180  | 0.294984  |
| 6            | 0.106401  | 6.270343  | -1.305449 | 6  | -3.098117 | 1.380854  | -1.997288 |
| 1            | -0.146691 | 5.437865  | -3.280252 | 6  | -3.674658 | 3.382698  | -0.144981 |
| 1            | 0.391573  | 6.789887  | 0.768125  | 1  | -3.278045 | 1.899373  | 1.358694  |
| 1            | 0.106854  | 7.300747  | -1.649653 | 6  | -3.447587 | 2.656092  | -2.435383 |
| 1            | 2.497485  | -3.546678 | 4.743602  | 1  | -2.865856 | 0.607110  | -2.721829 |
| 6            | 4.321675  | -0.430925 | -0.494856 | 6  | -3.728917 | 3.663448  | -1.509234 |
| 6            | 5.109873  | -0.286180 | -1.649532 | 1  | -3.888292 | 4.160796  | 0.581918  |
| 6            | 4.873266  | -0.006687 | 0.726067  | 1  | -3.490729 | 2.866353  | -3.500536 |
| 6            | 6.388439  | 0.264532  | -1.591291 | 1  | -3.986689 | 4.661722  | -1.851256 |
| 1            | 4.717251  | -0.590850 | -2.613560 | 17 | 0.000081  | -2.501415 | 1.259176  |
| 6            | 6.147772  | 0.558240  | 0.789857  | 6  | -0.000030 | 1.332643  | -1.084184 |
| 1            | 4.304647  | -0.124351 | 1.642359  | 6  | -0.000013 | 2.658044  | -0.541024 |
| 6            | 6.909489  | 0.697771  | -0.370343 | 6  | -0.000210 | 2.859038  | 0.849486  |
| 1            | 6.975118  | 0.366158  | -2.500671 | 6  | 0.000178  | 3.777871  | -1.392190 |
| 1            | 6.549016  | 0.880471  | 1.747982  | 6  | -0.000215 | 4.145689  | 1.377868  |
| 1            | 7.903343  | 1.135433  | -0.324338 | 1  | -0.000366 | 1.986408  | 1.494160  |
|              |           |           |           | 6  | 0.000169  | 5.062887  | -0.859406 |
|              |           |           |           | 1  | 0.000341  | 3.622909  | -2.465929 |
|              |           |           |           | 6  | -0.000027 | 5.252633  | 0.525445  |
|              |           |           |           | 1  | -0.000370 | 4.287566  | 2.455244  |
|              |           |           |           | 1  | 0.000322  | 5.921600  | -1.525345 |
|              |           |           |           | 1  | -0.000035 | 6.258106  | 0.937075  |
|              |           |           |           | 6  | 0.000133  | 0.440373  | -1.977318 |
|              |           |           |           | 1  | 0.000044  | 0.075856  | -2.989366 |
|              |           |           |           | 15 | 2.338399  | -0.510495 | -0.062040 |
|              |           |           |           | 6  | 3.012839  | -0.675617 | 1.634902  |
|              |           |           |           | 6  | 2.216078  | -0.264952 | 2.711929  |
|              |           |           |           | 6  | 4.310327  | -1.140892 | 1.879977  |
|              |           |           |           | 6  | 2.715024  | -0.301644 | 4.012885  |
|              |           |           |           | 1  | 1.199729  | 0.062708  | 2.522342  |
|              |           |           |           | 6  | 4.804910  | -1.186989 | 3.183453  |
| <b>INT1b</b> |           |           |           |    |           |           |           |
| 45           | 0.000025  | -0.584191 | -0.173380 |    |           |           |           |
| 15           | -2.338337 | -0.510616 | -0.062062 |    |           |           |           |
| 6            | -3.012701 | -0.675249 | 1.634974  |    |           |           |           |
| 6            | -2.215690 | -0.264882 | 2.711922  |    |           |           |           |
| 6            | -4.310453 | -1.139757 | 1.880144  |    |           |           |           |
| 6            | -2.714635 | -0.301114 | 4.012898  |    |           |           |           |
| 1            | -1.199163 | 0.062172  | 2.522265  |    |           |           |           |
| 6            | -4.805044 | -1.185380 | 3.183629  |    |           |           |           |
| 1            | -4.931114 | -1.474497 | 1.055472  |    |           |           |           |
| 6            | -4.010488 | -0.762781 | 4.250881  |    |           |           |           |
| 1            | -2.086517 | 0.014816  | 4.841096  |    |           |           |           |
| 1            | -5.810891 | -1.553658 | 3.365323  |    |           |           |           |
| 1            | -4.397042 | -0.801078 | 5.265508  |    |           |           |           |

|             |          |           |           |    |           |           |           |
|-------------|----------|-----------|-----------|----|-----------|-----------|-----------|
| 1           | 4.930786 | -1.475860 | 1.055246  | 6  | 6.136466  | -0.256579 | -2.960579 |
| 6           | 4.010619 | -0.764093 | 4.250779  | 6  | 5.001503  | -0.767090 | -3.546124 |
| 1           | 2.087104 | 0.014528  | 4.841141  | 6  | 3.820344  | -0.971938 | -2.787110 |
| 1           | 5.810550 | -1.555871 | 3.365073  | 6  | 3.800071  | -0.625272 | -1.400691 |
| 1           | 4.397165 | -0.802763 | 5.265394  | 6  | 4.992911  | -0.101415 | -0.828609 |
| 6           | 3.232760 | -1.770753 | -1.046225 | 6  | 6.129259  | 0.072148  | -1.585183 |
| 6           | 4.510233 | -1.545443 | -1.580898 | 1  | 2.672530  | -1.828250 | -4.407012 |
| 6           | 2.611693 | -3.013067 | -1.245666 | 1  | 7.037273  | -0.106927 | -3.548780 |
| 6           | 5.156160 | -2.547917 | -2.304869 | 1  | 4.991152  | -1.028548 | -4.601139 |
| 1           | 4.993994 | -0.584251 | -1.439368 | 6  | 2.654868  | -1.531618 | -3.361285 |
| 6           | 3.264310 | -4.013430 | -1.966131 | 6  | 2.590651  | -0.790406 | -0.642574 |
| 1           | 1.628849 | -3.189411 | -0.819994 | 1  | 4.999832  | 0.172135  | 0.218864  |
| 6           | 4.534281 | -3.782984 | -2.498430 | 1  | 7.026520  | 0.474219  | -1.123229 |
| 1           | 6.144271 | -2.363461 | -2.717419 | 6  | 1.452428  | -1.326626 | -1.247356 |
| 1           | 2.777378 | -4.973381 | -2.113166 | 6  | 1.520063  | -1.715078 | -2.613220 |
| 1           | 5.038002 | -4.562332 | -3.063600 | 17 | -1.900888 | 2.986733  | -0.938253 |
| 6           | 3.036454 | 1.090857  | -0.624913 | 1  | 1.600818  | 2.067644  | 2.941512  |
| 6           | 3.098293 | 1.381400  | -1.996825 | 1  | 0.662524  | -2.177565 | -3.079087 |
| 6           | 3.330563 | 2.104311  | 0.295619  | 15 | 0.869120  | 1.753286  | 0.118874  |
| 6           | 3.447708 | 2.656759  | -2.434621 | 15 | -0.202666 | -1.327822 | -0.381892 |
| 1           | 2.866221 | 0.607778  | -2.721554 | 6  | 1.917921  | 2.157308  | -1.323153 |
| 6           | 3.674364 | 3.382943  | -0.144047 | 6  | 3.259530  | 2.534641  | -1.175621 |
| 1           | 3.277686 | 1.899286  | 1.359282  | 6  | 1.368289  | 2.052785  | -2.607576 |
| 6           | 3.728799 | 3.663963  | -1.508240 | 6  | 4.041550  | 2.802817  | -2.297068 |
| 1           | 3.490994 | 2.867223  | -3.499728 | 1  | 3.700734  | 2.586526  | -0.184945 |
| 1           | 3.887823 | 4.160921  | 0.583032  | 6  | 2.157354  | 2.309139  | -3.727940 |
| 1           | 3.986521 | 4.662330  | -1.850028 | 1  | 0.326616  | 1.765268  | -2.709086 |
| <b>INT1</b> |          |           |           | 6  | 3.493840  | 2.681841  | -3.575023 |
| 6           | 4.676097 | -3.164401 | 2.245722  | 1  | 5.085131  | 3.074856  | -2.173698 |
| 6           | 4.009133 | -2.384894 | 1.328661  | 1  | 1.727671  | 2.214645  | -4.721195 |
| 6           | 3.347565 | -1.189449 | 1.723776  | 1  | 4.110067  | 2.872736  | -4.448956 |
| 6           | 3.397254 | -0.816451 | 3.103517  | 6  | 0.653735  | 3.329234  | 1.037323  |
| 6           | 4.083830 | -1.646216 | 4.027529  | 6  | -0.339447 | 3.380464  | 2.026770  |
| 6           | 4.712066 | -2.796965 | 3.611278  | 6  | 1.437067  | 4.462410  | 0.799929  |
| 1           | 5.172962 | -4.073844 | 1.919964  | 6  | -0.524313 | 4.532999  | 2.784710  |
| 1           | 3.976100 | -2.684372 | 0.288325  | 1  | -0.980356 | 2.521638  | 2.185057  |
| 6           | 2.619572 | -0.374208 | 0.795565  | 6  | 1.240941  | 5.623125  | 1.551644  |
| 6           | 2.755006 | 0.377385  | 3.509952  | 1  | 2.186659  | 4.453636  | 0.017744  |
| 1           | 4.104174 | -1.350868 | 5.073443  | 6  | 0.267095  | 5.660000  | 2.548310  |
| 1           | 5.236863 | -3.423853 | 4.326507  | 1  | -1.300160 | 4.558219  | 3.544692  |
| 6           | 2.079460 | 1.157021  | 2.604930  | 1  | 1.849425  | 6.500429  | 1.350422  |
| 6           | 1.989668 | 0.788592  | 1.235025  | 1  | 0.115468  | 6.564759  | 3.130279  |
| 1           | 2.804798 | 0.672478  | 4.555050  | 6  | 0.216852  | -2.068034 | 1.248953  |
|             |          |           |           | 6  | 0.935805  | -3.270469 | 1.332220  |

|    |           |           |           |              |           |           |           |
|----|-----------|-----------|-----------|--------------|-----------|-----------|-----------|
| 6  | -0.185151 | -1.434270 | 2.427844  | 1            | -4.276715 | 3.166265  | 0.747707  |
| 6  | 1.232200  | -3.831634 | 2.571268  | 6            | -5.004949 | -2.676955 | -0.586618 |
| 1  | 1.273421  | -3.759806 | 0.423523  | 1            | -4.291280 | -2.979749 | 0.181628  |
| 6  | 0.121575  | -1.989766 | 3.669816  | 1            | -5.666169 | -3.532574 | -0.782679 |
| 1  | -0.722978 | -0.498031 | 2.367111  | 1            | -4.429714 | -2.488095 | -1.497975 |
| 6  | 0.827859  | -3.189950 | 3.744169  | 6            | -6.844733 | -1.130284 | -1.298697 |
| 1  | 1.801698  | -4.754387 | 2.623010  | 1            | -6.341737 | -0.902322 | -2.246183 |
| 1  | -0.184588 | -1.477265 | 4.577198  | 1            | -7.488578 | -2.002439 | -1.476601 |
| 1  | 1.073905  | -3.620083 | 4.710549  | 1            | -7.493183 | -0.283140 | -1.054500 |
| 6  | -1.152717 | -2.699235 | -1.186635 | 1            | -2.495420 | 0.282304  | -3.002728 |
| 6  | -1.569569 | -2.570742 | -2.522904 | 14           | -4.717605 | 0.060850  | 0.284489  |
| 6  | -1.555221 | -3.842474 | -0.482110 |              |           |           |           |
| 6  | -2.305707 | -3.573106 | -3.149880 |              |           |           |           |
| 1  | -1.321918 | -1.675725 | -3.078898 | <b>INT3a</b> |           |           |           |
| 6  | -2.303295 | -4.843462 | -1.105484 | 45           | -0.454484 | 0.166694  | -1.416970 |
| 1  | -1.290032 | -3.960404 | 0.560420  | 17           | -2.895584 | 1.350389  | 0.934761  |
| 6  | -2.671854 | -4.719956 | -2.443043 | 6            | -2.470161 | 0.401427  | -2.649372 |
| 1  | -2.605295 | -3.450243 | -4.186870 | 6            | -1.862607 | -0.949275 | -2.451457 |
| 1  | -2.600767 | -5.719028 | -0.535415 | 6            | -3.877164 | 0.678934  | -2.094504 |
| 1  | -3.253062 | -5.499392 | -2.927097 | 1            | -2.408259 | 0.733352  | -3.692014 |
| 45 | -1.121610 | 0.735300  | -0.525390 | 1            | -1.798672 | 1.231495  | -2.133931 |
| 6  | -3.264884 | 0.065283  | -0.867880 | 1            | -2.429918 | -1.651410 | -1.842177 |
| 6  | -2.658811 | 0.194134  | -1.947491 | 1            | -1.481158 | -1.424166 | -3.355912 |
| 6  | -5.698175 | 1.682055  | 0.014319  | 1            | -4.608291 | 0.098989  | -2.676717 |
| 1  | -6.737015 | 1.402262  | 0.256008  | 1            | -4.143777 | 1.732554  | -2.260853 |
| 6  | -4.133656 | -0.131723 | 2.089768  | 14           | -4.275421 | 0.342988  | -0.282762 |
| 1  | -5.013368 | 0.100320  | 2.711641  | 6            | -4.284913 | -1.462276 | 0.194815  |
| 6  | -5.821120 | -1.435578 | -0.192109 | 6            | -4.001548 | -1.874392 | 1.506102  |
| 1  | -6.383981 | -1.669250 | 0.726888  | 6            | -4.650083 | -2.442776 | -0.744782 |
| 6  | -3.017227 | 0.862494  | 2.447935  | 6            | -4.061620 | -3.220537 | 1.865080  |
| 1  | -2.628594 | 0.668601  | 3.458594  | 1            | -3.714878 | -1.135365 | 2.248889  |
| 1  | -2.187249 | 0.771540  | 1.732893  | 6            | -4.714385 | -3.790054 | -0.389735 |
| 1  | -3.351183 | 1.900509  | 2.405990  | 1            | -4.872831 | -2.157923 | -1.769551 |
| 6  | -3.696980 | -1.570252 | 2.417705  | 6            | -4.415177 | -4.180987 | 0.916662  |
| 1  | -3.325887 | -1.638642 | 3.449358  | 1            | -3.819431 | -3.521595 | 2.880047  |
| 1  | -4.521125 | -2.283064 | 2.313520  | 1            | -4.988591 | -4.533565 | -1.132885 |
| 1  | -2.882708 | -1.900512 | 1.763759  | 1            | -4.455297 | -5.230802 | 1.193513  |
| 6  | -5.655173 | 2.149065  | -1.452865 | 6            | -5.950264 | 1.101804  | 0.076738  |
| 1  | -6.339856 | 2.994821  | -1.602791 | 6            | -6.144590 | 2.491882  | -0.016372 |
| 1  | -4.644910 | 2.480279  | -1.711170 | 6            | -7.053118 | 0.297193  | 0.406454  |
| 1  | -5.943166 | 1.360794  | -2.155635 | 6            | -7.397709 | 3.058204  | 0.208660  |
| 6  | -5.308191 | 2.850476  | 0.935036  | 1            | -5.303378 | 3.140149  | -0.252001 |
| 1  | -5.957566 | 3.715005  | 0.740377  | 6            | -8.311019 | 0.860553  | 0.630344  |
| 1  | -5.412472 | 2.596147  | 1.995854  | 1            | -6.926246 | -0.778479 | 0.492593  |
|    |           |           |           | 6            | -8.484574 | 2.241069  | 0.531085  |



|    |           |           |           |              |           |           |           |
|----|-----------|-----------|-----------|--------------|-----------|-----------|-----------|
| 1  | -7.528389 | 4.134579  | 0.136683  | 6            | 4.708230  | 2.960669  | -2.607627 |
| 1  | -9.152775 | 0.222567  | 0.885839  | 1            | 5.211422  | 4.129308  | -0.866587 |
| 1  | -9.462251 | 2.681387  | 0.707427  | 1            | 3.945131  | 1.700979  | -4.183219 |
| 6  | 3.878499  | -1.920705 | 4.140189  | 1            | 5.619534  | 3.217119  | -3.140548 |
| 6  | 3.663480  | -1.350939 | 2.905436  | 6            | 0.091158  | 3.413596  | 0.025815  |
| 6  | 2.607781  | -0.421229 | 2.698192  | 6            | -0.957178 | 3.877511  | -0.777788 |
| 6  | 1.764884  | -0.102878 | 3.809317  | 6            | 0.572561  | 4.248931  | 1.045673  |
| 6  | 2.002748  | -0.716678 | 5.065490  | 6            | -1.509099 | 5.142889  | -0.577477 |
| 6  | 3.039990  | -1.605267 | 5.233800  | 1            | -1.344769 | 3.234496  | -1.561832 |
| 1  | 4.694853  | -2.625209 | 4.273212  | 6            | 0.016770  | 5.510197  | 1.255317  |
| 1  | 4.304401  | -1.612269 | 2.072395  | 1            | 1.370052  | 3.904879  | 1.696255  |
| 6  | 2.355223  | 0.184097  | 1.421161  | 6            | -1.024978 | 5.962128  | 0.442440  |
| 6  | 0.698597  | 0.810306  | 3.617470  | 1            | -2.322172 | 5.484142  | -1.212662 |
| 1  | 1.346352  | -0.467809 | 5.895703  | 1            | 0.396949  | 6.140108  | 2.055005  |
| 1  | 3.215332  | -2.066180 | 6.201810  | 1            | -1.458378 | 6.944692  | 0.607149  |
| 6  | 0.492577  | 1.403912  | 2.399030  | 6            | 0.567192  | -2.245434 | 0.827256  |
| 6  | 1.333623  | 1.121282  | 1.285588  | 6            | 1.445319  | -3.177980 | 1.399681  |
| 1  | 0.039755  | 1.033044  | 4.453118  | 6            | -0.552434 | -1.822628 | 1.551710  |
| 6  | 7.199356  | 1.177007  | -0.050498 | 6            | 1.202099  | -3.684297 | 2.673814  |
| 6  | 6.698923  | 0.324738  | -1.007208 | 1            | 2.335923  | -3.483039 | 0.857738  |
| 6  | 5.374030  | -0.175119 | -0.915990 | 6            | -0.784432 | -2.318727 | 2.834534  |
| 6  | 4.545898  | 0.221266  | 0.180457  | 1            | -1.211957 | -1.083826 | 1.108928  |
| 6  | 5.096694  | 1.101355  | 1.152589  | 6            | 0.088958  | -3.248877 | 3.396868  |
| 6  | 6.387671  | 1.564307  | 1.041725  | 1            | 1.897392  | -4.390996 | 3.116676  |
| 1  | 5.473673  | -1.382566 | -2.706463 | 1            | -1.639414 | -1.962785 | 3.401142  |
| 1  | 8.215122  | 1.553938  | -0.129999 | 1            | -0.084846 | -3.623556 | 4.401592  |
| 1  | 7.311125  | 0.019213  | -1.852041 | 6            | 0.822305  | -2.946978 | -1.977935 |
| 6  | 4.841279  | -1.060306 | -1.882771 | 6            | 0.893265  | -2.673566 | -3.354858 |
| 6  | 3.193049  | -0.244974 | 0.254610  | 6            | 0.644688  | -4.272706 | -1.566480 |
| 1  | 4.478236  | 1.414494  | 1.985195  | 6            | 0.831349  | -3.701719 | -4.291927 |
| 1  | 6.785458  | 2.238616  | 1.795000  | 1            | 0.979476  | -1.640448 | -3.680858 |
| 6  | 2.690263  | -1.093933 | -0.734905 | 6            | 0.561395  | -5.302597 | -2.507716 |
| 6  | 3.546585  | -1.507200 | -1.790635 | 1            | 0.558698  | -4.506981 | -0.512084 |
| 1  | -0.336073 | 2.090184  | 2.273399  | 6            | 0.663699  | -5.023644 | -3.869406 |
| 1  | 3.168100  | -2.185380 | -2.544975 | 1            | 0.896238  | -3.470915 | -5.351821 |
| 15 | 0.816400  | 1.759351  | -0.368659 | 1            | 0.416204  | -6.325381 | -2.170307 |
| 15 | 0.874615  | -1.505731 | -0.823845 | 1            | 0.601738  | -5.826494 | -4.598841 |
| 6  | 2.376499  | 2.272708  | -1.211311 |              |           |           |           |
| 6  | 3.317467  | 3.137903  | -0.638744 |              |           |           |           |
| 6  | 2.607677  | 1.770952  | -2.498542 | <b>INT2b</b> |           |           |           |
| 6  | 4.477331  | 3.477578  | -1.331117 | 45           | -0.068085 | -1.391240 | 0.519025  |
| 1  | 3.157961  | 3.531526  | 0.359229  | 15           | -0.811044 | 0.576425  | -0.806363 |
| 6  | 3.769182  | 2.110372  | -3.192131 | 6            | -2.064000 | 0.208969  | -2.094796 |
| 1  | 1.872544  | 1.094807  | -2.928230 | 6            | -3.047310 | -0.750366 | -1.819561 |
|    |           |           |           | 6            | -2.099520 | 0.895624  | -3.315219 |

|    |           |           |           |             |           |           |           |
|----|-----------|-----------|-----------|-------------|-----------|-----------|-----------|
| 6  | -4.060380 | -1.006302 | -2.741041 | 1           | 0.274188  | -0.011857 | 3.215385  |
| 1  | -3.017263 | -1.302983 | -0.889424 | 6           | 1.256289  | -3.011794 | 2.793190  |
| 6  | -3.108927 | 0.630398  | -4.241671 | 6           | 0.465608  | -3.184728 | 1.496729  |
| 1  | -1.338650 | 1.635599  | -3.541132 | 6           | 2.528642  | -2.191002 | 2.526806  |
| 6  | -4.092859 | -0.317571 | -3.955191 | 1           | 0.635839  | -2.502151 | 3.539437  |
| 1  | -4.815683 | -1.752674 | -2.512100 | 1           | 1.511002  | -3.991572 | 3.226335  |
| 1  | -3.125143 | 1.164579  | -5.187669 | 1           | -0.492759 | -3.695049 | 1.668816  |
| 1  | -4.877400 | -0.523082 | -4.678208 | 1           | 1.025844  | -3.790730 | 0.776336  |
| 6  | 0.527679  | 1.405216  | -1.747563 | 1           | 2.953274  | -1.757317 | 3.440753  |
| 6  | 0.645897  | 2.800355  | -1.818984 | 1           | 3.308920  | -2.836584 | 2.103171  |
| 6  | 1.491493  | 0.598667  | -2.371485 | 14          | 2.161680  | -0.892277 | 1.172989  |
| 6  | 1.729629  | 3.378551  | -2.481415 | 6           | 2.408358  | 0.880288  | 1.794260  |
| 1  | -0.093773 | 3.432203  | -1.339369 | 6           | 2.530822  | 1.955157  | 0.894109  |
| 6  | 2.574536  | 1.180396  | -3.028881 | 6           | 2.409289  | 1.186707  | 3.167604  |
| 1  | 1.402504  | -0.480039 | -2.322077 | 6           | 2.614198  | 3.273939  | 1.340038  |
| 6  | 2.700879  | 2.570347  | -3.077318 | 1           | 2.553853  | 1.763059  | -0.170486 |
| 1  | 1.818036  | 4.460792  | -2.525716 | 6           | 2.487125  | 2.504141  | 3.623093  |
| 1  | 3.330242  | 0.541625  | -3.474883 | 1           | 2.353641  | 0.383774  | 3.899748  |
| 1  | 3.552978  | 3.023009  | -3.576796 | 6           | 2.580883  | 3.554309  | 2.706999  |
| 6  | -1.592471 | 1.955033  | 0.125219  | 1           | 2.692550  | 4.078922  | 0.614908  |
| 6  | -2.840845 | 2.490944  | -0.220183 | 1           | 2.480996  | 2.710145  | 4.690208  |
| 6  | -0.936678 | 2.441617  | 1.267832  | 1           | 2.637627  | 4.581233  | 3.057600  |
| 6  | -3.425250 | 3.485214  | 0.566743  | 6           | 3.403404  | -1.134599 | -0.237625 |
| 1  | -3.361688 | 2.123761  | -1.097124 | 6           | 3.341440  | -2.237306 | -1.107411 |
| 6  | -1.517962 | 3.439309  | 2.047876  | 6           | 4.500375  | -0.262593 | -0.371493 |
| 1  | 0.031792  | 2.044957  | 1.542588  | 6           | 4.306680  | -2.438508 | -2.093269 |
| 6  | -2.769017 | 3.958695  | 1.704247  | 1           | 2.509858  | -2.928179 | -1.039632 |
| 1  | -4.394706 | 3.889556  | 0.288466  | 6           | 5.473297  | -0.463276 | -1.352141 |
| 1  | -0.990792 | 3.805719  | 2.924125  | 1           | 4.602268  | 0.587810  | 0.293535  |
| 1  | -3.226699 | 4.730554  | 2.316797  | 6           | 5.373589  | -1.546531 | -2.225055 |
| 17 | 0.026855  | -2.568507 | -1.513179 | 1           | 4.221820  | -3.291203 | -2.761607 |
| 6  | -1.462270 | -0.883786 | 2.085870  | 1           | 6.305362  | 0.231263  | -1.435189 |
| 6  | -2.845045 | -1.117452 | 1.798720  | 1           | 6.124230  | -1.700184 | -2.995998 |
| 6  | -3.301960 | -2.395555 | 1.422991  |             |           |           |           |
| 6  | -3.743365 | -0.032923 | 1.815599  |             |           |           |           |
| 6  | -4.633011 | -2.578222 | 1.059242  | <b>INT2</b> |           |           |           |
| 1  | -2.602503 | -3.223354 | 1.396895  | 6           | 3.372988  | -4.045502 | 2.741776  |
| 6  | -5.070220 | -0.227866 | 1.445251  | 6           | 3.147709  | -3.145088 | 1.725844  |
| 1  | -3.384593 | 0.948993  | 2.098917  | 6           | 2.886586  | -1.774303 | 2.003405  |
| 6  | -5.516651 | -1.495284 | 1.061673  | 6           | 2.875053  | -1.355376 | 3.370463  |
| 1  | -4.978253 | -3.564222 | 0.763487  | 6           | 3.093929  | -2.310351 | 4.397188  |
| 1  | -5.754337 | 0.615321  | 1.445720  | 6           | 3.338675  | -3.629291 | 4.093547  |
| 1  | -6.551617 | -1.639239 | 0.765509  | 1           | 3.572372  | -5.086597 | 2.504290  |
| 6  | -0.357625 | -0.459298 | 2.476243  | 1           | 3.163498  | -3.480729 | 0.696163  |
|    |           |           |           | 6           | 2.609159  | -0.820442 | 0.968713  |

|    |           |           |           |    |           |           |           |
|----|-----------|-----------|-----------|----|-----------|-----------|-----------|
| 6  | 2.653114  | 0.011805  | 3.660913  | 6  | 2.818645  | 5.848949  | 2.000173  |
| 1  | 3.070033  | -1.974713 | 5.430635  | 1  | 1.041322  | 5.481247  | 3.168817  |
| 1  | 3.509379  | -4.351585 | 4.886510  | 1  | 4.500798  | 5.950217  | 0.655782  |
| 6  | 2.444479  | 0.921525  | 2.655062  | 1  | 3.031696  | 6.804230  | 2.471511  |
| 6  | 2.402664  | 0.521408  | 1.291066  | 6  | -0.389121 | -1.641539 | 1.239170  |
| 1  | 2.663820  | 0.338446  | 4.697564  | 6  | 0.020275  | -2.958553 | 1.488387  |
| 6  | 6.194694  | -2.228101 | -2.467210 | 6  | -0.925987 | -0.878638 | 2.285162  |
| 6  | 4.996146  | -2.312280 | -3.136743 | 6  | -0.107810 | -3.504676 | 2.763132  |
| 6  | 3.772335  | -2.029239 | -2.476533 | 1  | 0.465707  | -3.545909 | 0.692020  |
| 6  | 3.788161  | -1.634039 | -1.102374 | 6  | -1.043334 | -1.423964 | 3.562745  |
| 6  | 5.045389  | -1.555412 | -0.441901 | 1  | -1.270454 | 0.132876  | 2.091708  |
| 6  | 6.214992  | -1.850832 | -1.104015 | 6  | -0.633831 | -2.736225 | 3.802941  |
| 1  | 2.512507  | -2.434092 | -4.186596 | 1  | 0.229740  | -4.518912 | 2.950140  |
| 1  | 7.125540  | -2.450856 | -2.980612 | 1  | -1.457903 | -0.823642 | 4.367101  |
| 1  | 4.965271  | -2.601947 | -4.183799 | 1  | -0.721092 | -3.159839 | 4.799176  |
| 6  | 2.527974  | -2.127666 | -3.143942 | 6  | -1.505298 | -1.737044 | -1.451505 |
| 6  | 2.556095  | -1.303222 | -0.446290 | 6  | -1.944737 | -1.121163 | -2.633084 |
| 1  | 5.076315  | -1.253417 | 0.597695  | 6  | -2.014798 | -2.995028 | -1.110868 |
| 1  | 7.162989  | -1.786248 | -0.577683 | 6  | -2.851355 | -1.765805 | -3.470548 |
| 6  | 1.348683  | -1.431651 | -1.131065 | 1  | -1.597940 | -0.124924 | -2.881312 |
| 6  | 1.354098  | -1.853458 | -2.489280 | 6  | -2.942770 | -3.628633 | -1.939014 |
| 17 | -0.958892 | 3.721986  | -0.363766 | 1  | -1.717473 | -3.473474 | -0.186222 |
| 1  | 2.308104  | 1.965009  | 2.907014  | 6  | -3.357287 | -3.020610 | -3.123333 |
| 1  | 0.415105  | -1.953801 | -3.018519 | 1  | -3.183968 | -1.274066 | -4.379370 |
| 15 | 1.842533  | 1.761586  | 0.022568  | 1  | -3.343651 | -4.596243 | -1.651329 |
| 15 | -0.261310 | -0.873694 | -0.410515 | 1  | -4.079871 | -3.514087 | -3.766950 |
| 6  | 3.016371  | 1.582401  | -1.366398 | 45 | -0.499176 | 1.396923  | -0.342235 |
| 6  | 4.396922  | 1.463357  | -1.146982 | 6  | -3.631470 | 0.780426  | -0.244294 |
| 6  | 2.530219  | 1.583752  | -2.679222 | 6  | -2.442274 | 1.068173  | -0.381048 |
| 6  | 5.273716  | 1.345610  | -2.221919 | 6  | -5.422788 | -1.568023 | 0.287503  |
| 1  | 4.780611  | 1.441508  | -0.131704 | 1  | -5.173824 | -2.024070 | -0.683044 |
| 6  | 3.409078  | 1.455367  | -3.754941 | 6  | -6.327001 | 0.846719  | -1.596424 |
| 1  | 1.463913  | 1.679832  | -2.852662 | 1  | -6.511277 | 1.924626  | -1.466261 |
| 6  | 4.780108  | 1.334621  | -3.528054 | 6  | -6.040142 | 1.274127  | 1.510859  |
| 1  | 6.337852  | 1.235006  | -2.039437 | 1  | -5.666574 | 0.722147  | 2.387971  |
| 1  | 3.019866  | 1.446793  | -4.768852 | 6  | -7.686766 | 0.153552  | -1.788481 |
| 1  | 5.463743  | 1.227653  | -4.365169 | 1  | -8.215989 | 0.570993  | -2.656362 |
| 6  | 2.266816  | 3.381616  | 0.777906  | 1  | -7.554932 | -0.918601 | -1.978690 |
| 6  | 1.423182  | 3.888577  | 1.780774  | 1  | -8.343771 | 0.258264  | -0.919435 |
| 6  | 3.370577  | 4.142880  | 0.375147  | 6  | -5.468801 | 0.670540  | -2.860235 |
| 6  | 1.706128  | 5.104468  | 2.397265  | 1  | -6.002064 | 1.034735  | -3.749841 |
| 1  | 0.529877  | 3.343396  | 2.063332  | 1  | -4.519110 | 1.207184  | -2.779800 |
| 6  | 3.642967  | 5.369730  | 0.983401  | 1  | -5.234573 | -0.387886 | -3.027317 |
| 1  | 4.015454  | 3.791933  | -0.420994 | 6  | -6.780015 | -2.124877 | 0.750840  |

|              |           |           |           |    |           |           |           |
|--------------|-----------|-----------|-----------|----|-----------|-----------|-----------|
| 1            | -6.739434 | -3.219473 | 0.843691  | 6  | -6.952862 | 0.643716  | 0.085507  |
| 1            | -7.047567 | -1.731385 | 1.739050  | 6  | -6.765760 | 3.425974  | 0.143122  |
| 1            | -7.597438 | -1.881882 | 0.065988  | 1  | -4.641636 | 3.141069  | 0.007239  |
| 6            | -4.328850 | -1.980514 | 1.287417  | 6  | -8.110543 | 1.418001  | 0.185550  |
| 1            | -4.292098 | -3.073059 | 1.404623  | 1  | -7.034265 | -0.440218 | 0.073918  |
| 1            | -3.342561 | -1.638574 | 0.970943  | 6  | -8.017986 | 2.809778  | 0.212987  |
| 1            | -4.521219 | -1.555013 | 2.281371  | 1  | -6.690338 | 4.509746  | 0.172163  |
| 6            | -7.575921 | 1.319109  | 1.598531  | 1  | -9.082180 | 0.935216  | 0.247287  |
| 1            | -8.031226 | 0.323400  | 1.585299  | 1  | -8.917698 | 3.413900  | 0.293413  |
| 1            | -7.899096 | 1.819145  | 2.522079  | 6  | 3.926484  | -1.708772 | 4.177217  |
| 1            | -7.999065 | 1.888121  | 0.761767  | 6  | 3.699859  | -1.162147 | 2.934327  |
| 6            | -5.466548 | 2.700871  | 1.572435  | 6  | 2.584881  | -0.311626 | 2.698225  |
| 1            | -5.793157 | 3.293925  | 0.708340  | 6  | 1.700135  | -0.042941 | 3.789022  |
| 1            | -5.813360 | 3.223583  | 2.475029  | 6  | 1.951097  | -0.633378 | 5.054171  |
| 1            | -4.372919 | 2.701525  | 1.565613  | 6  | 3.042718  | -1.447769 | 5.249770  |
| 1            | -0.351224 | 1.370592  | -1.848802 | 1  | 4.787306  | -2.352919 | 4.333460  |
| 14           | -5.380791 | 0.324054  | -0.014502 | 1  | 4.376391  | -1.381760 | 2.117558  |
| <b>INT4a</b> |           |           |           | 6  | 2.312594  | 0.259083  | 1.409898  |
| 45           | -0.462416 | 0.117312  | -1.519907 | 6  | 0.589047  | 0.807397  | 3.569809  |
| 17           | -2.760911 | 0.978959  | 1.172283  | 1  | 1.261977  | -0.424999 | 5.868705  |
| 6            | -2.366006 | -0.266964 | -2.567384 | 1  | 3.227779  | -1.891287 | 6.224045  |
| 6            | -1.858466 | -1.489016 | -2.117309 | 6  | 0.369829  | 1.377163  | 2.342046  |
| 6            | -3.577849 | 0.444083  | -1.990562 | 6  | 1.230872  | 1.119042  | 1.238409  |
| 1            | -2.192528 | -0.023594 | -3.614608 | 1  | -0.093064 | 1.006339  | 4.392486  |
| 1            | -0.933076 | 1.429674  | -2.311873 | 6  | 7.099461  | 1.536581  | -0.046172 |
| 1            | -2.255721 | -1.973937 | -1.231295 | 6  | 6.653558  | 0.649468  | -0.998220 |
| 1            | -1.360653 | -2.150936 | -2.816909 | 6  | 5.362037  | 0.069211  | -0.904118 |
| 1            | -4.469541 | 0.145430  | -2.572950 | 6  | 4.510581  | 0.422428  | 0.188672  |
| 1            | -3.494900 | 1.526738  | -2.147485 | 6  | 5.004065  | 1.340570  | 1.156085  |
| 14           | -4.136533 | 0.217287  | -0.208844 | 6  | 6.264808  | 1.880170  | 1.043518  |
| 6            | -4.441625 | -1.571835 | 0.244724  | 1  | 5.536054  | -1.144862 | -2.684107 |
| 6            | -4.193770 | -2.065549 | 1.535479  | 1  | 8.090378  | 1.974335  | -0.127087 |
| 6            | -4.946444 | -2.461600 | -0.720509 | 1  | 7.284573  | 0.376764  | -1.840365 |
| 6            | -4.430753 | -3.403325 | 1.851078  | 6  | 4.885590  | -0.857047 | -1.861820 |
| 1            | -3.799215 | -1.398153 | 2.295918  | 6  | 3.191011  | -0.128151 | 0.263481  |
| 6            | -5.192496 | -3.798275 | -0.407362 | 1  | 4.366842  | 1.618918  | 1.987079  |
| 1            | -5.130039 | -2.115065 | -1.734363 | 1  | 6.620641  | 2.581179  | 1.793349  |
| 6            | -4.930323 | -4.272045 | 0.879699  | 6  | 2.744137  | -1.022852 | -0.708772 |
| 1            | -4.219096 | -3.769301 | 2.851943  | 6  | 3.624330  | -1.390603 | -1.762203 |
| 1            | -5.576589 | -4.471566 | -1.168676 | 1  | -0.482491 | 2.028182  | 2.205459  |
| 1            | -5.111028 | -5.315478 | 1.122805  | 1  | 3.294101  | -2.101616 | -2.508183 |
| 6            | -5.686937 | 1.246114  | 0.008426  | 15 | 0.704540  | 1.716223  | -0.437636 |
| 6            | -5.612059 | 2.650516  | 0.042280  | 15 | 0.962039  | -1.565181 | -0.766975 |
|              |           |           |           | 6  | 2.236887  | 2.335846  | -1.254917 |

|   |           |           |           |              |           |           |           |
|---|-----------|-----------|-----------|--------------|-----------|-----------|-----------|
| 6 | 3.127435  | 3.240435  | -0.662444 | <b>INT3b</b> |           |           |           |
| 6 | 2.506275  | 1.862533  | -2.545906 | 45           | -0.390355 | -0.849977 | -1.249333 |
| 6 | 4.271741  | 3.652065  | -1.341194 | 15           | -1.995806 | 0.034621  | 0.333711  |
| 1 | 2.946743  | 3.607324  | 0.341356  | 6            | -3.286722 | -1.132122 | 0.901636  |
| 6 | 3.653262  | 2.273316  | -3.224746 | 6            | -3.092978 | -2.500448 | 0.673509  |
| 1 | 1.808519  | 1.159406  | -2.992974 | 6            | -4.423622 | -0.700325 | 1.597956  |
| 6 | 4.540003  | 3.165857  | -2.622280 | 6            | -4.019309 | -3.428243 | 1.151420  |
| 1 | 4.966162  | 4.335072  | -0.861138 | 1            | -2.229524 | -2.824127 | 0.102389  |
| 1 | 3.857463  | 1.888224  | -4.220073 | 6            | -5.350178 | -1.628891 | 2.068624  |
| 1 | 5.439889  | 3.478754  | -3.144299 | 1            | -4.586955 | 0.360014  | 1.764326  |
| 6 | -0.175531 | 3.292500  | -0.024113 | 6            | -5.147104 | -2.993938 | 1.848803  |
| 6 | -1.342287 | 3.641451  | -0.713544 | 1            | -3.866212 | -4.487486 | 0.965644  |
| 6 | 0.307110  | 4.172037  | 0.958875  | 1            | -6.231975 | -1.288385 | 2.604188  |
| 6 | -2.005693 | 4.838344  | -0.439648 | 1            | -5.872083 | -3.715870 | 2.214348  |
| 1 | -1.727458 | 2.958115  | -1.461217 | 6            | -2.908853 | 1.532091  | -0.206030 |
| 6 | -0.356554 | 5.365333  | 1.238491  | 6            | -3.276680 | 2.550162  | 0.686216  |
| 1 | 1.188840  | 3.912974  | 1.534999  | 6            | -3.252389 | 1.650826  | -1.561512 |
| 6 | -1.516259 | 5.703773  | 0.538173  | 6            | -3.961858 | 3.675370  | 0.228377  |
| 1 | -2.909170 | 5.089054  | -0.989483 | 1            | -3.014237 | 2.474218  | 1.735837  |
| 1 | 0.030719  | 6.028645  | 2.007020  | 6            | -3.944383 | 2.775077  | -2.012739 |
| 1 | -2.035197 | 6.632612  | 0.758210  | 1            | -2.987331 | 0.857252  | -2.253024 |
| 6 | 0.693676  | -2.333700 | 0.875945  | 6            | -4.295223 | 3.791931  | -1.122255 |
| 6 | 1.635932  | -3.170399 | 1.491306  | 1            | -4.234754 | 4.460258  | 0.928286  |
| 6 | -0.500066 | -2.035307 | 1.544074  | 1            | -4.205682 | 2.855331  | -3.064104 |
| 6 | 1.384767  | -3.703298 | 2.753288  | 1            | -4.827581 | 4.669724  | -1.477952 |
| 1 | 2.578202  | -3.378665 | 0.992691  | 6            | -1.174029 | 0.540136  | 1.893507  |
| 6 | -0.747480 | -2.565890 | 2.809979  | 6            | -1.081224 | -0.359695 | 2.965508  |
| 1 | -1.212120 | -1.363414 | 1.078369  | 6            | -0.457551 | 1.747442  | 1.954854  |
| 6 | 0.193541  | -3.397899 | 3.416390  | 6            | -0.293046 | -0.056300 | 4.076587  |
| 1 | 2.129038  | -4.332322 | 3.232224  | 1            | -1.624410 | -1.298665 | 2.929997  |
| 1 | -1.669549 | -2.315175 | 3.325688  | 6            | 0.324961  | 2.049223  | 3.069232  |
| 1 | 0.008230  | -3.799426 | 4.408674  | 1            | -0.495988 | 2.445132  | 1.127918  |
| 6 | 1.031575  | -2.998239 | -1.926877 | 6            | 0.412202  | 1.147862  | 4.132390  |
| 6 | 1.063015  | -2.709800 | -3.303047 | 1            | -0.233409 | -0.761843 | 4.900610  |
| 6 | 0.990053  | -4.336237 | -1.521648 | 1            | 0.873704  | 2.985816  | 3.091057  |
| 6 | 1.087165  | -3.734044 | -4.246261 | 1            | 1.025461  | 1.381374  | 4.998181  |
| 1 | 1.047590  | -1.670315 | -3.622378 | 17           | -2.228750 | -1.562192 | -2.640633 |
| 6 | 0.998373  | -5.363995 | -2.469235 | 6            | 0.994704  | -1.609549 | -0.292022 |
| 1 | 0.940369  | -4.582588 | -0.467407 | 6            | 1.455322  | -2.935924 | -0.015179 |
| 6 | 1.054598  | -5.068343 | -3.830137 | 6            | 2.630540  | -3.118832 | 0.743080  |
| 1 | 1.116184  | -3.492113 | -5.305154 | 6            | 0.757103  | -4.055342 | -0.512871 |
| 1 | 0.959629  | -6.398056 | -2.137548 | 6            | 3.091473  | -4.404347 | 1.004975  |
| 1 | 1.062410  | -5.869321 | -4.564070 | 1            | 3.163320  | -2.243959 | 1.104077  |
|   |           |           |           | 6            | 1.226774  | -5.335532 | -0.247818 |

|             |           |           |           |    |           |           |           |
|-------------|-----------|-----------|-----------|----|-----------|-----------|-----------|
| 1           | -0.136069 | -3.886950 | -1.107331 | 6  | 2.854021  | -1.135556 | 3.410783  |
| 6           | 2.390347  | -5.509576 | 0.511411  | 6  | 3.095880  | -2.067568 | 4.453363  |
| 1           | 3.996850  | -4.549415 | 1.586640  | 6  | 3.402685  | -3.378713 | 4.172064  |
| 1           | 0.694020  | -6.200204 | -0.631711 | 1  | 3.724869  | -4.846791 | 2.608446  |
| 1           | 2.754412  | -6.512593 | 0.715653  | 1  | 3.276953  | -3.281864 | 0.769791  |
| 6           | 1.297512  | -0.283730 | -0.026003 | 6  | 2.615866  | -0.645155 | 0.999662  |
| 1           | 1.049751  | 0.058023  | 0.982803  | 6  | 2.567074  | 0.225162  | 3.680788  |
| 6           | 2.296390  | -1.068699 | -2.977908 | 1  | 3.039005  | -1.720701 | 5.481944  |
| 6           | 0.791118  | -1.309138 | -2.958734 | 1  | 3.590344  | -4.082189 | 4.978115  |
| 6           | 2.686465  | 0.397384  | -2.699959 | 6  | 2.339073  | 1.113589  | 2.659312  |
| 1           | 2.804946  | -1.732796 | -2.263737 | 6  | 2.349681  | 0.688749  | 1.304433  |
| 1           | 2.683112  | -1.352876 | -3.969287 | 1  | 2.538702  | 0.560600  | 4.714427  |
| 1           | 0.554740  | -2.353939 | -3.185015 | 6  | 6.306861  | -1.912784 | -2.378286 |
| 1           | 0.296531  | -0.687642 | -3.714741 | 6  | 5.124327  | -2.034096 | -3.070497 |
| 1           | 3.730984  | 0.574866  | -2.986561 | 6  | 3.879700  | -1.791553 | -2.433907 |
| 1           | 2.082157  | 1.055648  | -3.338062 | 6  | 3.855994  | -1.403933 | -1.057081 |
| 14          | 2.437090  | 0.908250  | -0.903282 | 6  | 5.097934  | -1.283473 | -0.373977 |
| 6           | 4.047734  | 0.947024  | 0.079095  | 6  | 6.289069  | -1.536755 | -1.014860 |
| 6           | 5.313262  | 1.004040  | -0.526742 | 1  | 2.666871  | -2.216992 | -4.172876 |
| 6           | 3.999247  | 0.907426  | 1.487008  | 1  | 7.254005  | -2.103990 | -2.874527 |
| 6           | 6.483786  | 1.020025  | 0.234674  | 1  | 5.122786  | -2.320680 | -4.119006 |
| 1           | 5.392735  | 1.035325  | -1.610206 | 6  | 2.652115  | -1.918045 | -3.127837 |
| 6           | 5.164143  | 0.926261  | 2.253939  | 6  | 2.601687  | -1.123616 | -0.420110 |
| 1           | 3.037588  | 0.867004  | 1.994029  | 1  | 5.098405  | -0.982473 | 0.666364  |
| 6           | 6.411382  | 0.980713  | 1.627396  | 1  | 7.224540  | -1.439741 | -0.471187 |
| 1           | 7.451000  | 1.062308  | -0.259143 | 6  | 1.410733  | -1.266956 | -1.135398 |
| 1           | 5.100318  | 0.897342  | 3.338684  | 6  | 1.458398  | -1.672893 | -2.497575 |
| 1           | 7.320922  | 0.992180  | 2.221895  | 1  | 2.131610  | 2.152475  | 2.888054  |
| 6           | 1.561520  | 2.565255  | -0.735320 | 1  | 0.532417  | -1.782211 | -3.048624 |
| 6           | 0.335834  | 2.760383  | -1.399253 | 15 | 1.740268  | 1.837759  | -0.010860 |
| 6           | 2.006106  | 3.571682  | 0.135991  | 15 | -0.232748 | -0.744238 | -0.451308 |
| 6           | -0.432120 | 3.903869  | -1.181929 | 6  | 3.038564  | 1.794284  | -1.298001 |
| 1           | -0.043053 | 1.989197  | -2.066273 | 6  | 4.407743  | 1.807893  | -0.998101 |
| 6           | 1.244075  | 4.722142  | 0.356321  | 6  | 2.626751  | 1.703038  | -2.633598 |
| 1           | 2.948622  | 3.447684  | 0.662621  | 6  | 5.350956  | 1.735721  | -2.020742 |
| 6           | 0.020186  | 4.885075  | -0.295743 | 1  | 4.732567  | 1.841075  | 0.037969  |
| 1           | -1.389642 | 4.016134  | -1.680168 | 6  | 3.572251  | 1.624246  | -3.655706 |
| 1           | 1.602576  | 5.487409  | 1.040201  | 1  | 1.563098  | 1.667332  | -2.853272 |
| 1           | -0.581805 | 5.771314  | -0.114014 | 6  | 4.933964  | 1.639034  | -3.350139 |
|             |           |           |           | 1  | 6.409614  | 1.726735  | -1.779947 |
|             |           |           |           | 1  | 3.245723  | 1.536909  | -4.688069 |
|             |           |           |           | 1  | 5.670922  | 1.564587  | -4.144535 |
|             |           |           |           | 6  | 1.854112  | 3.515229  | 0.732373  |
|             |           |           |           | 6  | 0.762522  | 3.927945  | 1.518741  |
| <b>INT3</b> |           |           |           |    |           |           |           |
| 6           | 3.477813  | -3.811779 | 2.827346  |    |           |           |           |
| 6           | 3.230685  | -2.935795 | 1.795374  |    |           |           |           |
| 6           | 2.907950  | -1.574298 | 2.049874  |    |           |           |           |

|    |           |           |           |              |           |           |           |
|----|-----------|-----------|-----------|--------------|-----------|-----------|-----------|
| 6  | 2.905612  | 4.412216  | 0.505943  | 6            | -5.403744 | 0.993594  | -2.839317 |
| 6  | 0.735164  | 5.202897  | 2.082182  | 1            | -5.920837 | 1.408095  | -3.716613 |
| 1  | -0.063346 | 3.237445  | 1.687955  | 1            | -4.479155 | 1.555509  | -2.679529 |
| 6  | 2.873516  | 5.689567  | 1.067586  | 1            | -5.118941 | -0.037466 | -3.081533 |
| 1  | 3.743004  | 4.119497  | -0.117585 | 6            | -6.717850 | -2.132413 | 0.492913  |
| 6  | 1.793329  | 6.086220  | 1.857803  | 1            | -6.642843 | -3.229086 | 0.493718  |
| 1  | -0.114113 | 5.507115  | 2.687169  | 1            | -7.015126 | -1.833042 | 1.505514  |
| 1  | 3.694292  | 6.377375  | 0.883923  | 1            | -7.530834 | -1.857764 | -0.185298 |
| 1  | 1.772275  | 7.082209  | 2.290918  | 6            | -4.282452 | -1.960180 | 1.089435  |
| 6  | -0.352848 | -1.586830 | 1.168501  | 1            | -4.218196 | -3.057239 | 1.116338  |
| 6  | 0.087479  | -2.904663 | 1.353229  | 1            | -3.301205 | -1.568000 | 0.820331  |
| 6  | -0.897085 | -0.884368 | 2.251652  | 1            | -4.502566 | -1.623252 | 2.111310  |
| 6  | -0.021043 | -3.513806 | 2.601421  | 6            | -7.705774 | 1.187386  | 1.553489  |
| 1  | 0.547434  | -3.442666 | 0.529999  | 1            | -8.126103 | 0.185141  | 1.421804  |
| 6  | -0.996065 | -1.493893 | 3.501586  | 1            | -8.091242 | 1.586111  | 2.502305  |
| 1  | -1.234965 | 0.134975  | 2.095154  | 1            | -8.105597 | 1.821961  | 0.753098  |
| 6  | -0.558287 | -2.807339 | 3.678587  | 6            | -5.643910 | 2.618895  | 1.779507  |
| 1  | 0.341297  | -4.527653 | 2.739335  | 1            | -5.939515 | 3.287822  | 0.960255  |
| 1  | -1.413321 | -0.940200 | 4.337855  | 1            | -6.054672 | 3.040944  | 2.707800  |
| 1  | -0.628192 | -3.278651 | 4.654776  | 1            | -4.551657 | 2.641213  | 1.839298  |
| 6  | -1.438018 | -1.611316 | -1.539790 | 14           | -5.394947 | 0.415551  | -0.029830 |
| 6  | -1.905401 | -0.926668 | -2.671119 |              |           |           |           |
| 6  | -1.902695 | -2.906766 | -1.286197 |              |           |           |           |
| 6  | -2.798498 | -1.538445 | -3.547794 | <b>INT5a</b> |           |           |           |
| 1  | -1.587052 | 0.098126  | -2.834504 | 45           | 0.415810  | -0.356481 | 1.142171  |
| 6  | -2.816479 | -3.509239 | -2.152563 | 17           | 0.109490  | -2.094980 | 2.678907  |
| 1  | -1.582154 | -3.438877 | -0.398984 | 6            | 1.337979  | 2.088588  | 2.540349  |
| 6  | -3.260758 | -2.830922 | -3.287624 | 6            | 1.429767  | 0.574962  | 2.715213  |
| 1  | -3.153968 | -0.995774 | -4.418518 | 6            | 1.437642  | 2.538933  | 1.071580  |
| 1  | -3.185010 | -4.507364 | -1.933343 | 1            | 0.397435  | 2.452764  | 2.968418  |
| 1  | -3.973007 | -3.300833 | -3.960062 | 1            | 2.142606  | 2.568160  | 3.118208  |
| 45 | -0.492051 | 1.421135  | -0.370816 | 1            | 1.013548  | 0.258703  | 3.670380  |
| 6  | -3.656385 | 0.941040  | -0.148429 | 1            | 2.461071  | 0.222901  | 2.655967  |
| 6  | -2.448053 | 1.172064  | -0.280667 | 1            | 0.589606  | 2.133351  | 0.497557  |
| 6  | -5.371150 | -1.496847 | 0.106273  | 1            | 1.318391  | 3.627237  | 0.991428  |
| 1  | -5.090041 | -1.859428 | -0.894258 | 14           | 2.976195  | 1.980175  | 0.164445  |
| 6  | -6.311753 | 1.030493  | -1.598612 | 6            | 2.934261  | 2.720926  | -1.572140 |
| 1  | -6.552093 | 2.085414  | -1.390610 | 6            | 1.764939  | 3.298339  | -2.095752 |
| 6  | -6.167287 | 1.191926  | 1.542562  | 6            | 4.076014  | 2.697847  | -2.392840 |
| 1  | -5.820441 | 0.564930  | 2.379046  | 6            | 1.732238  | 3.833644  | -3.383892 |
| 6  | -7.630010 | 0.296882  | -1.900137 | 1            | 0.857230  | 3.322354  | -1.501065 |
| 1  | -8.144594 | 0.757434  | -2.755105 | 6            | 4.051347  | 3.228611  | -3.683534 |
| 1  | -7.440691 | -0.750143 | -2.166179 | 1            | 5.003446  | 2.274721  | -2.012768 |
| 1  | -8.324264 | 0.303986  | -1.054283 | 6            | 2.877037  | 3.800483  | -4.180821 |
|    |           |           |           | 1            | 0.807511  | 4.256971  | -3.765375 |

|    |           |           |           |   |           |           |           |
|----|-----------|-----------|-----------|---|-----------|-----------|-----------|
| 1  | 4.947298  | 3.202088  | -4.298398 | 1 | -4.459235 | -3.607269 | 2.174986  |
| 6  | -2.896023 | 2.875906  | -4.211757 | 1 | -6.625131 | -2.439575 | 2.537854  |
| 6  | -2.986160 | 1.993758  | -3.159980 | 6 | -1.939264 | 1.475305  | 3.433709  |
| 6  | -2.521874 | 2.347327  | -1.863947 | 6 | -1.413879 | 0.793062  | 4.543168  |
| 6  | -1.990624 | 3.662737  | -1.674389 | 6 | -2.613038 | 2.687738  | 3.637919  |
| 6  | -1.914189 | 4.553300  | -2.776918 | 6 | -1.525172 | 1.336079  | 5.822097  |
| 6  | -2.351126 | 4.167914  | -4.023595 | 1 | -0.931228 | -0.168596 | 4.399592  |
| 1  | -3.243763 | 2.577431  | -5.196272 | 6 | -2.717230 | 3.230509  | 4.919105  |
| 1  | -3.408613 | 1.009320  | -3.312706 | 1 | -3.064438 | 3.211608  | 2.802473  |
| 6  | -2.579245 | 1.435270  | -0.757807 | 6 | -2.166569 | 2.561256  | 6.012821  |
| 6  | -1.556170 | 4.040046  | -0.380439 | 1 | -1.109477 | 0.799027  | 6.669867  |
| 1  | -1.502403 | 5.546088  | -2.614850 | 1 | -3.236388 | 4.174384  | 5.061388  |
| 1  | -2.285542 | 4.854362  | -4.862770 | 1 | -2.246910 | 2.986778  | 7.009052  |
| 6  | -1.603963 | 3.151298  | 0.662996  | 6 | -0.278658 | -0.525935 | -2.605663 |
| 6  | -2.113772 | 1.831296  | 0.496918  | 6 | -1.119093 | -0.596640 | -3.729342 |
| 1  | -1.158900 | 5.040235  | -0.227770 | 6 | 0.992405  | 0.040288  | -2.743739 |
| 6  | -7.546946 | 0.211329  | -0.849197 | 6 | -0.689273 | -0.111029 | -4.961898 |
| 6  | -6.887909 | -0.976033 | -1.066490 | 1 | -2.106121 | -1.037886 | -3.637605 |
| 6  | -5.471600 | -1.020709 | -1.127090 | 6 | 1.423514  | 0.523674  | -3.979612 |
| 6  | -4.716931 | 0.181931  | -0.962659 | 1 | 1.650420  | 0.095831  | -1.887673 |
| 6  | -5.431837 | 1.393730  | -0.751778 | 6 | 0.583796  | 0.451251  | -5.088903 |
| 6  | -6.807062 | 1.406696  | -0.692935 | 1 | -1.350095 | -0.167782 | -5.822718 |
| 1  | -5.342721 | -3.150969 | -1.468009 | 1 | 2.408117  | 0.969954  | -4.061157 |
| 1  | -8.631637 | 0.235521  | -0.797744 | 1 | 0.915771  | 0.836557  | -6.048951 |
| 1  | -7.441002 | -1.903938 | -1.186436 | 6 | -0.586113 | -3.055482 | -1.282618 |
| 6  | -4.775331 | -2.234935 | -1.325069 | 6 | -0.685957 | -3.912900 | -0.178567 |
| 6  | -3.281380 | 0.126682  | -0.956148 | 6 | -0.459140 | -3.610592 | -2.564205 |
| 1  | -4.881978 | 2.317329  | -0.620081 | 6 | -0.678697 | -5.297309 | -0.353855 |
| 1  | -7.329366 | 2.343793  | -0.522411 | 1 | -0.759421 | -3.496898 | 0.818929  |
| 6  | -2.629275 | -1.094622 | -1.107547 | 6 | -0.451147 | -4.994284 | -2.736474 |
| 6  | -3.405206 | -2.269930 | -1.313747 | 1 | -0.367254 | -2.964800 | -3.429485 |
| 1  | -1.219781 | 3.452252  | 1.628560  | 6 | -0.568004 | -5.842501 | -1.633371 |
| 1  | -2.907825 | -3.219308 | -1.450974 | 1 | -0.748197 | -5.946105 | 0.514373  |
| 15 | -1.812270 | 0.589467  | 1.825674  | 1 | -0.346096 | -5.409150 | -3.734930 |
| 15 | -0.774819 | -1.242888 | -0.986703 | 1 | -0.559856 | -6.920146 | -1.769926 |
| 6  | -3.366472 | -0.391306 | 1.992238  | 1 | 2.856046  | 4.214452  | -5.185562 |
| 6  | -4.588325 | 0.261991  | 2.214895  | 6 | 4.532133  | 2.596566  | 1.025615  |
| 6  | -3.329059 | -1.788200 | 1.986672  | 6 | 4.506916  | 3.797393  | 1.756383  |
| 6  | -5.755714 | -0.470514 | 2.404033  | 6 | 5.752529  | 1.903004  | 0.951256  |
| 1  | -4.628841 | 1.345825  | 2.229239  | 6 | 5.650014  | 4.286179  | 2.389646  |
| 6  | -4.500378 | -2.521736 | 2.185904  | 1 | 3.579969  | 4.361059  | 1.834633  |
| 1  | -2.385303 | -2.296615 | 1.837757  | 6 | 6.901018  | 2.387431  | 1.578463  |
| 6  | -5.713733 | -1.867001 | 2.390144  | 1 | 5.810109  | 0.964831  | 0.407158  |
| 1  | -6.698742 | 0.047366  | 2.550350  | 6 | 6.851241  | 3.580305  | 2.301309  |



|              |           |           |           |    |           |           |           |
|--------------|-----------|-----------|-----------|----|-----------|-----------|-----------|
| 1            | 5.604083  | 5.214634  | 2.952861  | 6  | -4.550664 | -2.454933 | 0.336967  |
| 1            | 7.831517  | 1.830222  | 1.509081  | 1  | -2.648527 | -2.121878 | -0.627041 |
| 1            | 7.742849  | 3.956729  | 2.795491  | 6  | -5.375647 | -0.621181 | 1.680063  |
| 6            | 2.292805  | -0.914482 | 0.454162  | 1  | -4.115979 | 1.119771  | 1.780078  |
| 6            | 3.073635  | 0.122582  | 0.059793  | 6  | -5.533851 | -1.910121 | 1.163341  |
| 14           | 3.141206  | -2.608146 | 0.125123  | 1  | -4.668180 | -3.454306 | -0.071759 |
| 6            | 5.034059  | -2.351413 | 0.423107  | 1  | -6.143650 | -0.191168 | 2.316868  |
| 1            | 5.348521  | -1.674391 | -0.384156 | 1  | -6.425020 | -2.484128 | 1.401638  |
| 6            | 2.916154  | -2.882569 | -1.779048 | 6  | -2.173639 | 2.237292  | 0.129471  |
| 1            | 1.901716  | -2.525610 | -1.985999 | 6  | -2.249549 | 3.031572  | 1.284722  |
| 6            | 2.483043  | -4.003480 | 1.253243  | 6  | -2.525648 | 2.798199  | -1.106487 |
| 1            | 1.401662  | -3.855546 | 1.267445  | 6  | -2.649837 | 4.364986  | 1.200945  |
| 6            | 5.426899  | -1.671883 | 1.746817  | 1  | -1.986589 | 2.616903  | 2.250958  |
| 1            | 4.851802  | -0.759719 | 1.927297  | 6  | -2.935088 | 4.129404  | -1.183077 |
| 1            | 5.271530  | -2.335548 | 2.601638  | 1  | -2.480146 | 2.190935  | -2.003096 |
| 1            | 6.491810  | -1.398236 | 1.739212  | 6  | -2.991030 | 4.919115  | -0.033385 |
| 6            | 5.837083  | -3.651051 | 0.233997  | 1  | -2.694607 | 4.968679  | 2.103059  |
| 1            | 5.631031  | -4.131470 | -0.728919 | 1  | -3.204503 | 4.548858  | -2.148290 |
| 1            | 6.917355  | -3.453006 | 0.279229  | 1  | -3.301059 | 5.958428  | -0.097686 |
| 1            | 5.610540  | -4.378115 | 1.021488  | 6  | -0.787381 | 0.355687  | 1.820191  |
| 6            | 3.866550  | -2.010832 | -2.620691 | 6  | -1.002874 | -0.729971 | 2.677919  |
| 1            | 4.905873  | -2.349226 | -2.531890 | 6  | 0.237397  | 1.271476  | 2.113068  |
| 1            | 3.592628  | -2.072186 | -3.682592 | 6  | -0.203110 | -0.899646 | 3.810525  |
| 1            | 3.832946  | -0.954036 | -2.341804 | 1  | -1.779807 | -1.452113 | 2.452965  |
| 6            | 2.987655  | -4.332304 | -2.284695 | 6  | 1.031216  | 1.099126  | 3.243986  |
| 1            | 2.180929  | -4.944306 | -1.881976 | 1  | 0.427940  | 2.105015  | 1.448527  |
| 1            | 2.897685  | -4.356902 | -3.380208 | 6  | 0.815468  | 0.010103  | 4.094969  |
| 1            | 3.938056  | -4.813949 | -2.027038 | 1  | -0.376390 | -1.748503 | 4.465990  |
| 6            | 2.972924  | -3.798106 | 2.700476  | 1  | 1.824349  | 1.811860  | 3.449667  |
| 1            | 2.388186  | -4.423110 | 3.388286  | 1  | 1.438950  | -0.126539 | 4.974092  |
| 1            | 4.023806  | -4.090647 | 2.805791  | 17 | -2.231307 | 0.060945  | -3.118142 |
| 1            | 2.867014  | -2.763387 | 3.036517  | 6  | 0.751022  | -1.913945 | -1.014485 |
| 6            | 2.742578  | -5.460172 | 0.831080  | 6  | 0.137142  | -3.068293 | -0.309365 |
| 1            | 2.175617  | -5.739986 | -0.058344 | 6  | 0.412779  | -3.311769 | 1.045205  |
| 1            | 3.800195  | -5.660608 | 0.629261  | 6  | -0.781763 | -3.910262 | -0.962869 |
| 1            | 2.434853  | -6.139277 | 1.639234  | 6  | -0.233377 | -4.338531 | 1.732880  |
| 1            | 4.025610  | -0.136648 | -0.421777 | 1  | 1.140846  | -2.696171 | 1.560823  |
|              |           |           |           | 6  | -1.425059 | -4.936172 | -0.276613 |
|              |           |           |           | 1  | -1.030487 | -3.728707 | -2.004141 |
|              |           |           |           | 6  | -1.159390 | -5.151141 | 1.078675  |
|              |           |           |           | 1  | -0.005933 | -4.505714 | 2.782212  |
|              |           |           |           | 1  | -2.141906 | -5.564230 | -0.798264 |
|              |           |           |           | 1  | -1.663471 | -5.949891 | 1.615009  |
|              |           |           |           | 6  | 1.228710  | -0.767251 | -0.329357 |
| <b>INT4b</b> |           |           |           |    |           |           |           |
| 45           | -0.555826 | -0.380692 | -1.515220 |    |           |           |           |
| 15           | -1.678158 | 0.466327  | 0.220444  |    |           |           |           |
| 6            | -3.242429 | -0.428018 | 0.551040  |    |           |           |           |
| 6            | -3.410862 | -1.713924 | 0.024997  |    |           |           |           |
| 6            | -4.233466 | 0.118243  | 1.378645  |    |           |           |           |

|             |           |           |           |    |           |           |           |
|-------------|-----------|-----------|-----------|----|-----------|-----------|-----------|
| 1           | 1.042022  | -0.763628 | 0.738042  | 1  | 3.227976  | 2.061516  | -3.004452 |
| 6           | 2.489756  | -1.631848 | -2.943385 | 14 | 1.642389  | 2.560811  | -1.212690 |
| 6           | 1.065553  | -2.027796 | -2.505357 | 6  | 0.232084  | 3.827953  | -0.987009 |
| 6           | 2.789726  | -0.132019 | -2.749346 | 6  | 0.063976  | 4.537725  | 0.219887  |
| 1           | 3.210448  | -2.238534 | -2.379703 | 6  | -0.727392 | 4.050080  | -1.994328 |
| 1           | 2.604770  | -1.906763 | -3.999266 | 6  | -0.996285 | 5.424628  | 0.406288  |
| 1           | 0.819446  | -3.029572 | -2.864489 | 1  | 0.774013  | 4.401414  | 1.026679  |
| 1           | 0.364141  | -1.363189 | -3.094991 | 6  | -1.800100 | 4.924700  | -1.810364 |
| 1           | 3.783891  | 0.111639  | -3.142366 | 1  | -0.629699 | 3.544715  | -2.949176 |
| 1           | 2.071514  | 0.462310  | -3.330243 | 6  | -1.939060 | 5.617468  | -0.606932 |
| 14          | 2.631837  | 0.298235  | -0.918845 | 1  | -1.090131 | 5.955085  | 1.350086  |
| 6           | 4.179287  | -0.217533 | 0.026722  | 1  | -2.520760 | 5.072883  | -2.610883 |
| 6           | 5.427739  | -0.386675 | -0.593449 | 1  | -2.767483 | 6.306044  | -0.462207 |
| 6           | 4.099872  | -0.452796 | 1.412840  | 6  | 3.099640  | 3.195873  | -0.178306 |
| 6           | 6.554203  | -0.773380 | 0.135627  | 6  | 3.267582  | 4.580732  | 0.007404  |
| 1           | 5.527686  | -0.215660 | -1.662493 | 6  | 4.103076  | 2.350391  | 0.327444  |
| 6           | 5.221575  | -0.834996 | 2.148140  | 6  | 4.363837  | 5.098363  | 0.698986  |
| 1           | 3.149578  | -0.330014 | 1.927388  | 1  | 2.528447  | 5.271534  | -0.387037 |
| 6           | 6.452856  | -0.997657 | 1.509060  | 6  | 5.202244  | 2.861694  | 1.019608  |
| 1           | 7.509286  | -0.899475 | -0.367486 | 1  | 4.007197  | 1.279424  | 0.189159  |
| 1           | 5.136219  | -1.008905 | 3.217771  | 6  | 5.332718  | 4.238100  | 1.215987  |
| 6           | 2.258877  | 2.098306  | -0.537233 | 1  | 4.459832  | 6.172976  | 0.833088  |
| 6           | 1.137765  | 2.730193  | -1.106971 | 1  | 5.956907  | 2.184034  | 1.407158  |
| 6           | 2.994684  | 2.805807  | 0.428431  | 1  | 6.186713  | 4.635918  | 1.758199  |
| 6           | 0.748039  | 4.008011  | -0.705462 | 6  | -6.815847 | -0.490860 | -0.066589 |
| 1           | 0.535670  | 2.198185  | -1.840580 | 6  | -5.524884 | -0.803795 | 0.295187  |
| 6           | 2.608951  | 4.085141  | 0.834583  | 6  | -4.530302 | 0.205778  | 0.414804  |
| 1           | 3.865227  | 2.342960  | 0.884586  | 6  | -4.907567 | 1.558109  | 0.138021  |
| 6           | 1.479311  | 4.684096  | 0.273707  | 6  | -6.241441 | 1.846460  | -0.248372 |
| 1           | -0.138943 | 4.462019  | -1.134564 | 6  | -7.181202 | 0.846227  | -0.345922 |
| 1           | 3.185767  | 4.610780  | 1.591322  | 1  | -7.559167 | -1.279326 | -0.144046 |
| 1           | 1.167049  | 5.673126  | 0.598058  | 1  | -5.256662 | -1.833901 | 0.494652  |
| 1           | 7.327878  | -1.298889 | 2.078644  | 6  | -3.173036 | -0.092912 | 0.777507  |
|             |           |           |           | 6  | -3.925839 | 2.574170  | 0.236118  |
|             |           |           |           | 1  | -6.505928 | 2.878583  | -0.463565 |
|             |           |           |           | 1  | -8.201310 | 1.079165  | -0.637565 |
|             |           |           |           | 6  | -2.646620 | 2.279320  | 0.629351  |
|             |           |           |           | 6  | -2.255995 | 0.944448  | 0.938765  |
|             |           |           |           | 1  | -4.190048 | 3.597811  | -0.013161 |
|             |           |           |           | 6  | -3.872779 | -3.785506 | 4.327865  |
|             |           |           |           | 6  | -3.196326 | -4.395411 | 3.296785  |
|             |           |           |           | 6  | -2.836577 | -3.668864 | 2.132414  |
|             |           |           |           | 6  | -3.179154 | -2.282984 | 2.037983  |
|             |           |           |           | 6  | -3.881985 | -1.684991 | 3.119383  |
| <b>INT4</b> |           |           |           |    |           |           |           |
| 45          | 0.370988  | 0.575219  | -1.024928 |    |           |           |           |
| 6           | 1.265566  | 1.687028  | -3.832385 |    |           |           |           |
| 6           | 0.921786  | 0.387988  | -3.097645 |    |           |           |           |
| 6           | 2.239167  | 2.541603  | -3.015859 |    |           |           |           |
| 1           | 0.346704  | 2.253775  | -4.033540 |    |           |           |           |
| 1           | 1.685138  | 1.452842  | -4.824483 |    |           |           |           |
| 1           | 0.125738  | -0.136459 | -3.638956 |    |           |           |           |
| 1           | 1.791527  | -0.277565 | -3.101212 |    |           |           |           |
| 1           | 2.378986  | 3.549669  | -3.427618 |    |           |           |           |

|    |           |           |           |    |           |           |           |
|----|-----------|-----------|-----------|----|-----------|-----------|-----------|
| 6  | -4.220604 | -2.416932 | 4.234037  | 1  | -5.993056 | -0.835184 | -3.242182 |
| 1  | -1.884085 | -5.328061 | 1.125360  | 1  | -3.559937 | 2.700167  | -3.556326 |
| 1  | -4.141344 | -4.350906 | 5.215599  | 1  | -5.732544 | 1.537389  | -3.924411 |
| 1  | -2.922246 | -5.445424 | 3.358651  | 6  | -0.711268 | -2.455761 | -2.666133 |
| 6  | -2.135904 | -4.272619 | 1.060817  | 6  | 0.629103  | -2.849334 | -2.532710 |
| 6  | -2.781153 | -1.534043 | 0.887504  | 6  | -1.511168 | -3.059422 | -3.644496 |
| 1  | -4.139921 | -0.633973 | 3.057815  | 6  | 1.149735  | -3.854209 | -3.346573 |
| 1  | -4.753269 | -1.940409 | 5.052066  | 1  | 1.266933  | -2.349727 | -1.811214 |
| 6  | -2.069541 | -2.156976 | -0.139606 | 6  | -0.982416 | -4.056264 | -4.465371 |
| 6  | -1.762763 | -3.541006 | -0.039340 | 1  | -2.540694 | -2.745953 | -3.776428 |
| 1  | -1.914059 | 3.072769  | 0.679416  | 6  | 0.345311  | -4.460690 | -4.313133 |
| 1  | -1.211745 | -4.021544 | -0.838502 | 1  | 2.187974  | -4.151051 | -3.231030 |
| 15 | -0.453907 | 0.672579  | 1.215504  | 1  | -1.608548 | -4.515341 | -5.225414 |
| 15 | -1.317574 | -1.170992 | -1.508101 | 1  | 0.753574  | -5.238308 | -4.952647 |
| 6  | -0.288343 | -0.758618 | 2.352983  | 6  | 2.011556  | -0.264975 | -0.544821 |
| 6  | -0.801891 | -0.686953 | 3.656504  | 6  | 2.994079  | -0.949884 | -0.248163 |
| 6  | 0.386955  | -1.912149 | 1.942303  | 14 | 4.481816  | -1.972299 | -0.062363 |
| 6  | -0.669331 | -1.767504 | 4.523752  | 6  | 5.125880  | -1.962133 | 1.735345  |
| 1  | -1.311328 | 0.211790  | 3.989399  | 1  | 6.020910  | -2.603663 | 1.741784  |
| 6  | 0.519071  | -2.992768 | 2.814449  | 6  | 4.066389  | -3.748740 | -0.651826 |
| 1  | 0.819427  | -1.952437 | 0.951277  | 1  | 3.908848  | -3.635137 | -1.735777 |
| 6  | -0.012264 | -2.925579 | 4.101783  | 6  | 5.795290  | -1.164131 | -1.196081 |
| 1  | -1.089105 | -1.711305 | 5.523589  | 1  | 5.782948  | -0.106774 | -0.890521 |
| 1  | 1.038882  | -3.885052 | 2.480749  | 6  | 4.121690  | -2.530457 | 2.750230  |
| 1  | 0.085653  | -3.770769 | 4.776976  | 1  | 4.512782  | -2.451957 | 3.774345  |
| 6  | 0.101663  | 2.010174  | 2.338245  | 1  | 3.173415  | -1.983481 | 2.717161  |
| 6  | 1.492546  | 2.157482  | 2.435816  | 1  | 3.900076  | -3.586275 | 2.565136  |
| 6  | -0.731516 | 2.843348  | 3.094001  | 6  | 5.554152  | -0.549023 | 2.162753  |
| 6  | 2.045435  | 3.154721  | 3.235681  | 1  | 4.695935  | 0.132324  | 2.166124  |
| 1  | 2.139520  | 1.505128  | 1.860935  | 1  | 5.972864  | -0.554213 | 3.178511  |
| 6  | -0.176797 | 3.840138  | 3.898805  | 1  | 6.311989  | -0.126077 | 1.494007  |
| 1  | -1.809287 | 2.732139  | 3.042579  | 6  | 5.221864  | -4.742899 | -0.444667 |
| 6  | 1.208678  | 4.006100  | 3.961407  | 1  | 4.958304  | -5.739813 | -0.824665 |
| 1  | 3.123465  | 3.279490  | 3.262126  | 1  | 6.137620  | -4.428278 | -0.954613 |
| 1  | -0.830072 | 4.491662  | 4.472992  | 1  | 5.460129  | -4.855603 | 0.620459  |
| 1  | 1.634331  | 4.795344  | 4.574687  | 6  | 2.767219  | -4.320579 | -0.058210 |
| 6  | -2.744498 | -0.372962 | -2.329698 | 1  | 2.897417  | -4.578108 | 0.998502  |
| 6  | -3.974034 | -1.016482 | -2.528028 | 1  | 1.936139  | -3.614259 | -0.125489 |
| 6  | -2.608895 | 0.968218  | -2.712479 | 1  | 2.467531  | -5.239493 | -0.580851 |
| 6  | -5.038993 | -0.334031 | -3.111995 | 6  | 7.231506  | -1.681084 | -1.017647 |
| 1  | -4.108692 | -2.038354 | -2.187175 | 1  | 7.331628  | -2.718470 | -1.357402 |
| 6  | -3.676625 | 1.654709  | -3.286797 | 1  | 7.939213  | -1.081958 | -1.606926 |
| 1  | -1.668735 | 1.485859  | -2.545194 | 1  | 7.559256  | -1.644969 | 0.027625  |
| 6  | -4.893485 | 1.002731  | -3.488996 | 6  | 5.366548  | -1.210669 | -2.671869 |

|              |           |           |           |    |           |           |           |
|--------------|-----------|-----------|-----------|----|-----------|-----------|-----------|
| 1            | 5.369291  | -2.239344 | -3.055584 | 6  | 3.771307  | -1.309410 | -0.638995 |
| 1            | 4.357155  | -0.805854 | -2.805495 | 6  | 4.926663  | -0.705637 | -0.069744 |
| 1            | 6.051560  | -0.628015 | -3.302773 | 6  | 6.171849  | -0.881929 | -0.629063 |
| <b>INT7a</b> |           |           |           | 1  | 2.932536  | -3.338133 | -3.278010 |
| 45           | -0.975636 | 0.605501  | -1.228496 | 1  | 7.318923  | -1.787356 | -2.234122 |
| 6            | -2.715871 | 2.264254  | -3.157166 | 1  | 5.342236  | -2.859203 | -3.275923 |
| 6            | -1.390206 | 2.341771  | -2.385633 | 6  | 2.805732  | -2.727127 | -2.387749 |
| 6            | -3.886184 | 2.033772  | -2.185896 | 6  | 2.458407  | -1.130342 | -0.084206 |
| 1            | -2.884472 | 3.174036  | -3.757282 | 1  | 4.817229  | -0.093385 | 0.816775  |
| 1            | -2.667369 | 1.428093  | -3.866841 | 1  | 7.038201  | -0.411090 | -0.173013 |
| 1            | -1.380750 | 3.240457  | -1.753409 | 6  | 1.365435  | -1.772430 | -0.667442 |
| 1            | -0.542303 | 2.451633  | -3.080153 | 6  | 1.563711  | -2.573158 | -1.826967 |
| 1            | -4.178892 | 2.981135  | -1.715742 | 1  | 1.376940  | 2.818105  | 2.230391  |
| 1            | -4.781359 | 1.663897  | -2.699746 | 1  | 0.710620  | -3.067520 | -2.276574 |
| 14           | -3.256231 | 0.866905  | -0.806344 | 15 | 1.005972  | 1.674551  | -0.455294 |
| 6            | -3.487486 | 1.798683  | 0.845238  | 15 | -0.388791 | -1.409936 | -0.181271 |
| 6            | -3.200430 | 3.175334  | 0.904131  | 6  | 2.296937  | 1.443763  | -1.733767 |
| 6            | -3.971110 | 1.196815  | 2.021096  | 6  | 3.624846  | 1.843242  | -1.529339 |
| 6            | -3.373462 | 3.912073  | 2.076424  | 6  | 1.949624  | 0.808138  | -2.934193 |
| 1            | -2.832254 | 3.682852  | 0.017734  | 6  | 4.587319  | 1.615266  | -2.510260 |
| 6            | -4.131022 | 1.922477  | 3.203553  | 1  | 3.907796  | 2.310947  | -0.590895 |
| 1            | -4.241701 | 0.146948  | 2.015766  | 6  | 2.916682  | 0.569889  | -3.909659 |
| 6            | -3.828658 | 3.284420  | 3.237494  | 1  | 0.924093  | 0.480977  | -3.087911 |
| 1            | -3.158812 | 4.977873  | 2.082045  | 6  | 4.235933  | 0.973056  | -3.699116 |
| 1            | -4.507194 | 1.424809  | 4.094108  | 1  | 5.616881  | 1.911834  | -2.335186 |
| 6            | 3.738037  | -2.612937 | 3.709222  | 1  | 2.640808  | 0.058593  | -4.827263 |
| 6            | 3.345885  | -2.105231 | 2.491684  | 1  | 4.992270  | 0.777728  | -4.453565 |
| 6            | 2.796334  | -0.797475 | 2.382556  | 6  | 0.920021  | 3.491476  | -0.211346 |
| 6            | 2.678362  | -0.017320 | 3.575059  | 6  | -0.036896 | 3.981988  | 0.691184  |
| 6            | 3.082941  | -0.570797 | 4.817383  | 6  | 1.681850  | 4.404178  | -0.950927 |
| 6            | 3.601023  | -1.842940 | 4.888249  | 6  | -0.194490 | 5.351865  | 0.884755  |
| 1            | 4.152281  | -3.615583 | 3.766491  | 1  | -0.675949 | 3.289371  | 1.227436  |
| 1            | 3.445200  | -2.710032 | 1.598723  | 6  | 1.509611  | 5.778218  | -0.768483 |
| 6            | 2.331287  | -0.264833 | 1.134222  | 1  | 2.403158  | 4.048837  | -1.677013 |
| 6            | 2.159911  | 1.295530  | 3.480416  | 6  | 0.580520  | 6.256112  | 0.154778  |
| 1            | 2.975272  | 0.034620  | 5.713717  | 1  | -0.933702 | 5.709751  | 1.594996  |
| 1            | 3.908416  | -2.257314 | 5.844146  | 1  | 2.104814  | 6.474050  | -1.353240 |
| 6            | 1.752433  | 1.804450  | 2.273714  | 1  | 0.451182  | 7.325345  | 0.296708  |
| 6            | 1.810295  | 1.029033  | 1.084229  | 6  | -0.396340 | -1.519948 | 1.651629  |
| 1            | 2.091011  | 1.901417  | 4.380284  | 6  | 0.218730  | -2.553904 | 2.373516  |
| 6            | 6.332048  | -1.661007 | -1.798137 | 6  | -1.053021 | -0.501551 | 2.353384  |
| 6            | 5.235578  | -2.256641 | -2.377424 | 6  | 0.148162  | -2.583609 | 3.764344  |
| 6            | 3.941781  | -2.105314 | -1.815222 | 1  | 0.789589  | -3.314048 | 1.850686  |
|              |           |           |           | 6  | -1.121886 | -0.528298 | 3.746267  |

|   |           |           |           |    |           |           |           |
|---|-----------|-----------|-----------|----|-----------|-----------|-----------|
| 1 | -1.498966 | 0.317676  | 1.801941  | 6  | -0.137314 | 2.547172  | -0.263605 |
| 6 | -0.525872 | -1.572700 | 4.453453  | 6  | -0.158696 | 3.464641  | 0.794663  |
| 1 | 0.646954  | -3.377752 | 4.311061  | 6  | 0.756097  | 2.765870  | -1.326245 |
| 1 | -1.640231 | 0.271175  | 4.267680  | 6  | 0.709583  | 4.558744  | 0.803883  |
| 1 | -0.571035 | -1.593884 | 5.538719  | 1  | -0.851549 | 3.324479  | 1.616703  |
| 6 | -1.288162 | -2.929760 | -0.734465 | 6  | 1.622070  | 3.857239  | -1.316051 |
| 6 | -1.880822 | -2.906521 | -2.006158 | 1  | 0.774726  | 2.077236  | -2.163732 |
| 6 | -1.435494 | -4.081531 | 0.049476  | 6  | 1.608372  | 4.754431  | -0.244799 |
| 6 | -2.597759 | -4.002423 | -2.481885 | 1  | 0.677938  | 5.261208  | 1.632694  |
| 1 | -1.803155 | -2.007759 | -2.608570 | 1  | 2.309898  | 4.005296  | -2.143862 |
| 6 | -2.153733 | -5.178552 | -0.425906 | 1  | 2.286870  | 5.602668  | -0.233389 |
| 1 | -1.021534 | -4.120733 | 1.048372  | 6  | -2.355125 | 1.283522  | 1.063830  |
| 6 | -2.738116 | -5.143280 | -1.691650 | 6  | -3.694954 | 1.618733  | 0.837953  |
| 1 | -3.064534 | -3.953729 | -3.461310 | 6  | -1.914680 | 1.086827  | 2.383219  |
| 1 | -2.265580 | -6.058087 | 0.202517  | 6  | -4.576053 | 1.770558  | 1.910387  |
| 1 | -3.309285 | -5.993170 | -2.054528 | 1  | -4.055775 | 1.751236  | -0.175835 |
| 1 | -3.961232 | 3.854123  | 4.153502  | 6  | -2.793096 | 1.247918  | 3.453161  |
| 6 | -4.290021 | -0.718863 | -0.675509 | 1  | -0.882377 | 0.807779  | 2.566822  |
| 6 | -5.295800 | -1.004190 | -1.614062 | 6  | -4.128706 | 1.587781  | 3.218826  |
| 6 | -4.032649 | -1.695562 | 0.304126  | 1  | -5.614587 | 2.026330  | 1.719510  |
| 6 | -6.013876 | -2.201491 | -1.577175 | 1  | -2.437597 | 1.097391  | 4.468992  |
| 1 | -5.523387 | -0.284065 | -2.394808 | 1  | -4.815893 | 1.703977  | 4.052409  |
| 6 | -4.749274 | -2.889962 | 0.354711  | 17 | 1.851181  | -0.478081 | -1.715759 |
| 1 | -3.242926 | -1.536944 | 1.032350  | 6  | -1.781464 | -1.953041 | 0.785155  |
| 6 | -5.742908 | -3.148761 | -0.590086 | 6  | -3.153589 | -2.187559 | 0.430596  |
| 1 | -6.784440 | -2.393237 | -2.319950 | 6  | -3.493553 | -2.816468 | -0.781321 |
| 1 | -4.514554 | -3.627677 | 1.116517  | 6  | -4.185085 | -1.737229 | 1.276032  |
| 1 | -6.296048 | -4.083852 | -0.560547 | 6  | -4.828128 | -2.994718 | -1.134012 |
| 1 | -2.117856 | -0.107373 | -2.079401 | 1  | -2.695258 | -3.158478 | -1.432836 |

**INT5b**

|    |           |           |           |   |           |           |           |
|----|-----------|-----------|-----------|---|-----------|-----------|-----------|
| 45 | -0.152375 | -1.215627 | -0.334966 | 6 | -5.845970 | -2.539879 | -0.291105 |
| 15 | -1.142414 | 1.000515  | -0.287200 | 1 | -5.076537 | -3.485727 | -2.071121 |
| 6  | -2.135407 | 1.255288  | -1.814307 | 1 | -6.303091 | -1.546585 | 1.569135  |
| 6  | -2.539907 | 0.121073  | -2.531756 | 1 | -6.887035 | -2.671413 | -0.572515 |
| 6  | -2.520250 | 2.525191  | -2.270289 | 6 | -0.784321 | -1.762685 | 1.537118  |
| 6  | -3.324000 | 0.250786  | -3.678757 | 1 | -0.243081 | -1.827448 | 2.464623  |
| 1  | -2.238622 | -0.859876 | -2.177277 | 6 | 1.596776  | -3.728601 | 0.192255  |
| 6  | -3.300351 | 2.654194  | -3.418615 | 6 | 0.434552  | -3.192617 | -0.647861 |
| 1  | -2.206273 | 3.410262  | -1.725563 | 6 | 2.956280  | -3.081719 | -0.128705 |
| 6  | -3.704854 | 1.517138  | -4.123715 | 1 | 1.365103  | -3.585830 | 1.255499  |
| 1  | -3.634562 | -0.637016 | -4.222398 | 1 | 1.705311  | -4.817242 | 0.053637  |
| 1  | -3.593607 | 3.641831  | -3.764067 | 1 | -0.441678 | -3.829399 | -0.475363 |
| 1  | -4.312926 | 1.620612  | -5.018209 | 1 | 0.685505  | -3.259936 | -1.720766 |

|             |           |           |           |   |           |           |           |
|-------------|-----------|-----------|-----------|---|-----------|-----------|-----------|
| 1           | 3.743419  | -3.457890 | 0.541972  | 1 | -0.839091 | 4.062266  | -1.377801 |
| 1           | 3.273154  | -3.368214 | -1.141933 | 6 | 0.099451  | 6.485955  | 0.806308  |
| 14          | 3.039146  | -1.212394 | -0.068787 | 1 | 2.023162  | 6.589278  | 1.771461  |
| 6           | 2.479735  | -0.436740 | 1.528618  | 1 | -1.700903 | 6.117333  | -0.326447 |
| 6           | 2.182759  | 0.933418  | 1.630580  | 1 | -0.283566 | 7.383576  | 1.284542  |
| 6           | 2.416529  | -1.222447 | 2.693359  | 6 | 3.553742  | 2.373372  | -1.137087 |
| 6           | 1.807173  | 1.493221  | 2.850911  | 6 | 4.240692  | 2.448641  | 0.088288  |
| 1           | 2.228182  | 1.566343  | 0.750473  | 6 | 4.333751  | 2.157736  | -2.288349 |
| 6           | 2.037642  | -0.665021 | 3.915012  | 6 | 5.629397  | 2.346150  | 0.160034  |
| 1           | 2.649275  | -2.282339 | 2.645901  | 1 | 3.684444  | 2.591831  | 1.005652  |
| 6           | 1.726265  | 0.694214  | 3.994109  | 6 | 5.722669  | 2.033425  | -2.224800 |
| 1           | 1.568781  | 2.550630  | 2.901462  | 1 | 3.856961  | 2.088984  | -3.260845 |
| 1           | 1.988147  | -1.288998 | 4.803343  | 6 | 6.378679  | 2.135367  | -0.998365 |
| 1           | 1.430013  | 1.130755  | 4.944100  | 1 | 6.125041  | 2.418059  | 1.124232  |
| 6           | 4.752824  | -0.601483 | -0.512861 | 1 | 6.291056  | 1.861142  | -3.134972 |
| 6           | 5.367694  | -0.999389 | -1.714251 | 1 | 7.460035  | 2.043998  | -0.944245 |
| 6           | 5.470280  | 0.240524  | 0.353020  | 6 | -6.964660 | 0.008801  | -0.122383 |
| 6           | 6.653302  | -0.571811 | -2.039322 | 6 | -5.676662 | -0.373129 | 0.179607  |
| 1           | 4.832728  | -1.643102 | -2.408879 | 6 | -4.638904 | 0.587553  | 0.321091  |
| 6           | 6.759012  | 0.670566  | 0.031229  | 6 | -4.967287 | 1.964146  | 0.114100  |
| 1           | 5.016012  | 0.565594  | 1.284567  | 6 | -6.299993 | 2.326584  | -0.206180 |
| 6           | 7.351608  | 0.264917  | -1.164599 | 6 | -7.284103 | 1.371052  | -0.317861 |
| 1           | 7.111168  | -0.887838 | -2.972674 | 1 | -7.739879 | -0.745727 | -0.220731 |
| 1           | 7.298051  | 1.323142  | 0.712652  | 1 | -5.444636 | -1.422223 | 0.311464  |
| 1           | 8.354062  | 0.599773  | -1.417022 | 6 | -3.285601 | 0.217194  | 0.647138  |
|             |           |           |           | 6 | -3.937762 | 2.934248  | 0.213554  |
|             |           |           |           | 1 | -6.527901 | 3.378014  | -0.362012 |
|             |           |           |           | 1 | -8.303040 | 1.659599  | -0.559697 |
|             |           |           |           | 6 | -2.657484 | 2.567661  | 0.532845  |
|             |           |           |           | 6 | -2.318692 | 1.208946  | 0.789708  |
|             |           |           |           | 1 | -4.175684 | 3.978143  | 0.024192  |
|             |           |           |           | 6 | -4.330146 | -3.365746 | 4.212815  |
|             |           |           |           | 6 | -3.675642 | -4.036948 | 3.206204  |
|             |           |           |           | 6 | -3.227663 | -3.352437 | 2.046935  |
|             |           |           |           | 6 | -3.458161 | -1.945859 | 1.927912  |
|             |           |           |           | 6 | -4.137949 | -1.284035 | 2.986891  |
|             |           |           |           | 6 | -4.563989 | -1.975151 | 4.097576  |
|             |           |           |           | 1 | -2.383863 | -5.093733 | 1.082297  |
|             |           |           |           | 1 | -4.667133 | -3.898907 | 5.097167  |
|             |           |           |           | 1 | -3.485847 | -5.104415 | 3.283843  |
|             |           |           |           | 6 | -2.546503 | -4.021871 | 1.002572  |
|             |           |           |           | 6 | -2.976403 | -1.243790 | 0.776387  |
|             |           |           |           | 1 | -4.307829 | -0.216383 | 2.914548  |
|             |           |           |           | 1 | -5.076731 | -1.447995 | 4.897062  |
| <b>INT5</b> |           |           |           |   |           |           |           |
| 45          | 0.299288  | 0.598268  | -1.126644 |   |           |           |           |
| 6           | 0.642850  | 1.279522  | -3.356600 |   |           |           |           |
| 6           | 1.389848  | 0.142706  | -3.133244 |   |           |           |           |
| 6           | 1.208508  | 2.669992  | -3.137832 |   |           |           |           |
| 1           | -0.770648 | 1.768808  | -1.453724 |   |           |           |           |
| 1           | -0.320474 | 1.173222  | -3.850115 |   |           |           |           |
| 1           | 1.040782  | -0.826853 | -3.462819 |   |           |           |           |
| 1           | 2.438388  | 0.200024  | -2.865829 |   |           |           |           |
| 1           | 0.420300  | 3.420119  | -3.251436 |   |           |           |           |
| 1           | 2.001849  | 2.913643  | -3.854542 |   |           |           |           |
| 14          | 1.671939  | 2.548446  | -1.278028 |   |           |           |           |
| 6           | 1.094501  | 4.136890  | -0.422730 |   |           |           |           |
| 6           | 1.883118  | 4.885616  | 0.464465  |   |           |           |           |
| 6           | -0.200783 | 4.615999  | -0.694056 |   |           |           |           |
| 6           | 1.391961  | 6.039809  | 1.077969  |   |           |           |           |
| 1           | 2.897109  | 4.571001  | 0.682401  |   |           |           |           |
| 6           | -0.695546 | 5.773182  | -0.094303 |   |           |           |           |

|    |           |           |           |              |           |           |           |
|----|-----------|-----------|-----------|--------------|-----------|-----------|-----------|
| 6  | -2.276365 | -1.932838 | -0.216196 | 6            | -0.989346 | -3.742011 | -4.714892 |
| 6  | -2.081946 | -3.333791 | -0.090572 | 1            | -2.453564 | -2.245590 | -4.224671 |
| 1  | -1.880927 | 3.319883  | 0.559740  | 6            | 0.189574  | -4.382567 | -4.333835 |
| 1  | -1.549862 | -3.868027 | -0.867434 | 1            | 1.766970  | -4.473748 | -2.857256 |
| 15 | -0.530101 | 0.814678  | 0.992370  | 1            | -1.488830 | -4.023747 | -5.637764 |
| 15 | -1.491531 | -1.011431 | -1.620275 | 1            | 0.610113  | -5.166534 | -4.957330 |
| 6  | -0.495485 | -0.574901 | 2.204646  | 6            | 1.817876  | -0.604588 | -0.460161 |
| 6  | -1.021065 | -0.334297 | 3.484237  | 6            | 2.783884  | -1.252663 | -0.050811 |
| 6  | 0.042395  | -1.829777 | 1.911782  | 14           | 4.284827  | -2.151041 | 0.421011  |
| 6  | -1.028504 | -1.341498 | 4.444562  | 6            | 4.721323  | -1.802696 | 2.249120  |
| 1  | -1.430646 | 0.640639  | 3.728979  | 1            | 5.586777  | -2.436579 | 2.495763  |
| 6  | 0.033058  | -2.836370 | 2.877147  | 6            | 4.032531  | -4.032902 | 0.137613  |
| 1  | 0.483550  | -2.009156 | 0.942468  | 1            | 4.190245  | -4.176471 | -0.943091 |
| 6  | -0.503895 | -2.599211 | 4.141244  | 6            | 5.683047  | -1.487559 | -0.694680 |
| 1  | -1.454347 | -1.147715 | 5.424441  | 1            | 5.674897  | -0.407776 | -0.499354 |
| 1  | 0.446563  | -3.809098 | 2.630988  | 6            | 3.572206  | -2.165645 | 3.202883  |
| 1  | -0.515343 | -3.388310 | 4.887394  | 1            | 3.837478  | -1.941314 | 4.245852  |
| 6  | 0.248021  | 2.071354  | 2.082570  | 1            | 2.667153  | -1.598595 | 2.961547  |
| 6  | 1.612102  | 1.836219  | 2.324401  | 1            | 3.312349  | -3.228550 | 3.151464  |
| 6  | -0.401767 | 3.101278  | 2.767193  | 6            | 5.135553  | -0.336959 | 2.454677  |
| 6  | 2.310136  | 2.625894  | 3.232635  | 1            | 4.330560  | 0.340219  | 2.148337  |
| 1  | 2.112820  | 1.023395  | 1.803998  | 1            | 5.359936  | -0.134743 | 3.511885  |
| 6  | 0.310821  | 3.907251  | 3.658823  | 1            | 6.019469  | -0.070833 | 1.866465  |
| 1  | -1.460193 | 3.280019  | 2.623725  | 6            | 5.072468  | -4.889076 | 0.881677  |
| 6  | 1.663148  | 3.672050  | 3.895980  | 1            | 4.963246  | -5.953368 | 0.630077  |
| 1  | 3.360612  | 2.422516  | 3.421617  | 1            | 6.100611  | -4.597229 | 0.643221  |
| 1  | -0.200432 | 4.717769  | 4.170031  | 1            | 4.950709  | -4.799512 | 1.968199  |
| 1  | 2.210940  | 4.295924  | 4.596443  | 6            | 2.611979  | -4.524181 | 0.461207  |
| 6  | -2.997713 | -0.352306 | -2.448800 | 1            | 2.399350  | -4.438781 | 1.533148  |
| 6  | -4.114570 | -1.182806 | -2.637351 | 1            | 1.850107  | -3.944576 | -0.067292 |
| 6  | -3.080654 | 0.990395  | -2.831463 | 1            | 2.486603  | -5.582079 | 0.188976  |
| 6  | -5.283046 | -0.679809 | -3.202985 | 6            | 7.085538  | -2.017231 | -0.360326 |
| 1  | -4.075525 | -2.218729 | -2.313933 | 1            | 7.178662  | -3.084372 | -0.597493 |
| 6  | -4.256290 | 1.496277  | -3.387503 | 1            | 7.854236  | -1.491210 | -0.944010 |
| 1  | -2.236545 | 1.643431  | -2.643663 | 1            | 7.334758  | -1.892367 | 0.700275  |
| 6  | -5.358561 | 0.664310  | -3.575367 | 6            | 5.362603  | -1.672896 | -2.185395 |
| 1  | -6.143953 | -1.329785 | -3.329800 | 1            | 5.376414  | -2.733352 | -2.471126 |
| 1  | -4.313271 | 2.547023  | -3.657532 | 1            | 4.372944  | -1.272113 | -2.427452 |
| 1  | -6.278129 | 1.061559  | -3.995055 | 1            | 6.099356  | -1.155162 | -2.815019 |
| 6  | -0.902476 | -2.355454 | -2.726415 |              |           |           |           |
| 6  | 0.303381  | -2.984146 | -2.365248 |              |           |           |           |
| 6  | -1.537007 | -2.734839 | -3.915596 | <b>INT8a</b> |           |           |           |
| 6  | 0.836520  | -3.998888 | -3.155544 | 45           | -0.902829 | 0.974757  | -0.747737 |
| 1  | 0.845773  | -2.638433 | -1.490829 | 6            | -3.168415 | 3.036200  | -2.448043 |
|    |           |           |           | 6            | -1.647260 | 3.078365  | -2.284496 |

|    |           |           |           |    |           |           |           |
|----|-----------|-----------|-----------|----|-----------|-----------|-----------|
| 6  | -3.862644 | 2.601196  | -1.152871 | 1  | 4.876540  | -0.636996 | 0.723776  |
| 1  | -3.521707 | 4.032163  | -2.750652 | 1  | 7.019223  | -1.147936 | -0.353781 |
| 1  | -3.423517 | 2.354435  | -3.270768 | 6  | 1.199584  | -1.608112 | -0.857088 |
| 1  | -1.357889 | 3.585171  | -1.357408 | 6  | 1.272812  | -2.273799 | -2.112540 |
| 1  | -1.130108 | 3.587632  | -3.105979 | 1  | 1.769460  | 2.640371  | 2.334052  |
| 1  | -3.693709 | 3.377100  | -0.393634 | 1  | 0.357567  | -2.574809 | -2.605410 |
| 1  | -4.950975 | 2.552285  | -1.292130 | 15 | 1.305505  | 1.662035  | -0.438350 |
| 14 | -3.257408 | 0.933873  | -0.371114 | 15 | -0.493185 | -1.123112 | -0.220354 |
| 6  | -3.552493 | 1.217735  | 1.496315  | 6  | 2.629022  | 1.485315  | -1.690810 |
| 6  | -2.911197 | 2.321299  | 2.094237  | 6  | 3.979910  | 1.734039  | -1.412576 |
| 6  | -4.278873 | 0.371287  | 2.349540  | 6  | 2.258604  | 1.045120  | -2.967745 |
| 6  | -2.950214 | 2.547145  | 3.469204  | 6  | 4.945879  | 1.540753  | -2.397400 |
| 1  | -2.364500 | 3.017978  | 1.464899  | 1  | 4.274192  | 2.053995  | -0.416967 |
| 6  | -4.327246 | 0.587590  | 3.729095  | 6  | 3.227075  | 0.848986  | -3.951868 |
| 1  | -4.820626 | -0.472355 | 1.936107  | 1  | 1.212163  | 0.829658  | -3.165018 |
| 6  | -3.652715 | 1.668121  | 4.298222  | 6  | 4.570972  | 1.092759  | -3.666406 |
| 1  | -2.436921 | 3.406574  | 3.894767  | 1  | 5.993172  | 1.715462  | -2.169529 |
| 1  | -4.893582 | -0.092334 | 4.360905  | 1  | 2.934418  | 0.489006  | -4.934156 |
| 6  | 3.598982  | -3.078872 | 3.462469  | 1  | 5.328202  | 0.924866  | -4.426764 |
| 6  | 3.225594  | -2.470824 | 2.286169  | 6  | 1.264927  | 3.462812  | -0.073904 |
| 6  | 2.792625  | -1.116175 | 2.265461  | 6  | 0.293240  | 3.917578  | 0.836417  |
| 6  | 2.759520  | -0.398738 | 3.502633  | 6  | 2.043953  | 4.406728  | -0.754617 |
| 6  | 3.129874  | -1.060142 | 4.702411  | 6  | 0.119798  | 5.278885  | 1.074608  |
| 6  | 3.543905  | -2.371842 | 4.686711  | 1  | -0.330443 | 3.193026  | 1.349987  |
| 1  | 3.929661  | -4.113680 | 3.453229  | 6  | 1.860583  | 5.772257  | -0.523321 |
| 1  | 3.256238  | -3.025711 | 1.356226  | 1  | 2.788670  | 4.078241  | -1.470926 |
| 6  | 2.383178  | -0.460600 | 1.060490  | 6  | 0.903158  | 6.212626  | 0.390591  |
| 6  | 2.374117  | 0.963607  | 3.490093  | 1  | -0.633145 | 5.610017  | 1.784634  |
| 1  | 3.086906  | -0.503894 | 5.635380  | 1  | 2.470363  | 6.492794  | -1.061508 |
| 1  | 3.831646  | -2.866189 | 5.610194  | 1  | 0.763842  | 7.275430  | 0.566536  |
| 6  | 2.033550  | 1.590551  | 2.316711  | 6  | -0.439588 | -1.628391 | 1.541756  |
| 6  | 2.018513  | 0.885017  | 1.084436  | 6  | 0.089099  | -2.856722 | 1.966616  |
| 1  | 2.366583  | 1.516093  | 4.426377  | 6  | -0.905161 | -0.718878 | 2.499142  |
| 6  | 6.125453  | -2.088255 | -2.091411 | 6  | 0.121799  | -3.178198 | 3.321456  |
| 6  | 4.949632  | -2.446861 | -2.708715 | 1  | 0.517121  | -3.542780 | 1.242462  |
| 6  | 3.696389  | -2.176830 | -2.100974 | 6  | -0.863350 | -1.037794 | 3.856164  |
| 6  | 3.653260  | -1.515171 | -0.834043 | 1  | -1.285722 | 0.240611  | 2.174769  |
| 6  | 4.888493  | -1.150690 | -0.229399 | 6  | -0.353995 | -2.268916 | 4.268881  |
| 6  | 6.089869  | -1.435162 | -0.837584 | 1  | 0.550620  | -4.123245 | 3.640406  |
| 1  | 2.501405  | -3.044549 | -3.680169 | 1  | -1.229757 | -0.317756 | 4.581052  |
| 1  | 7.080034  | -2.302680 | -2.563506 | 1  | -0.311943 | -2.516706 | 5.325771  |
| 1  | 4.960058  | -2.945801 | -3.674499 | 6  | -1.543093 | -2.378409 | -1.072960 |
| 6  | 2.475330  | -2.540924 | -2.716926 | 6  | -2.068850 | -2.017447 | -2.323178 |
| 6  | 2.384753  | -1.222138 | -0.228169 | 6  | -1.804036 | -3.660191 | -0.576007 |



|   |           |           |           |    |           |           |           |
|---|-----------|-----------|-----------|----|-----------|-----------|-----------|
| 6 | -2.810580 | -2.925231 | -3.073673 | 1  | 7.579162  | -2.371208 | 0.351557  |
| 1 | -1.905635 | -1.004410 | -2.681255 | 6  | -4.327959 | 2.365245  | 1.745409  |
| 6 | -2.557254 | -4.567063 | -1.323432 | 6  | -3.443415 | 2.781514  | 2.739778  |
| 1 | -1.441894 | -3.952341 | 0.401754  | 6  | -3.998578 | 1.291298  | 0.915198  |
| 6 | -3.055680 | -4.205622 | -2.574643 | 6  | -2.219808 | 2.127531  | 2.897347  |
| 1 | -3.226446 | -2.621919 | -4.029544 | 6  | -1.884633 | 1.064748  | 2.063598  |
| 1 | -2.760680 | -5.555488 | -0.920203 | 6  | -2.778626 | 0.624478  | 1.073894  |
| 1 | -3.651061 | -4.909559 | -3.149079 | 1  | -1.512649 | 2.464208  | 3.649062  |
| 1 | -3.685608 | 1.833399  | 5.372002  | 1  | -0.920596 | 0.578862  | 2.171355  |
| 6 | -4.462399 | -0.409697 | -0.951613 | 15 | -2.223529 | -0.698579 | -0.071318 |
| 6 | -5.253063 | -0.219599 | -2.098593 | 6  | -3.782449 | -1.309569 | -0.833187 |
| 6 | -4.566240 | -1.655072 | -0.303629 | 6  | -4.857599 | -1.779315 | -0.064393 |
| 6 | -6.112474 | -1.213730 | -2.571039 | 6  | -3.885996 | -1.312992 | -2.229730 |
| 1 | -5.200585 | 0.722650  | -2.638098 | 6  | -6.020992 | -2.230992 | -0.683873 |
| 6 | -5.432447 | -2.647479 | -0.757314 | 1  | -4.782511 | -1.794223 | 1.018548  |
| 1 | -3.939767 | -1.866025 | 0.557592  | 6  | -5.051473 | -1.768414 | -2.849884 |
| 6 | -6.210722 | -2.430395 | -1.896036 | 1  | -3.037195 | -0.966404 | -2.813159 |
| 1 | -6.710420 | -1.034794 | -3.461622 | 6  | -6.120326 | -2.224468 | -2.078389 |
| 1 | -5.484646 | -3.598490 | -0.234468 | 1  | -6.849306 | -2.592300 | -0.080602 |
| 1 | -6.881315 | -3.205764 | -2.257413 | 1  | -5.121386 | -1.770217 | -3.934232 |
| 1 | -1.230039 | 2.033115  | -2.324930 | 1  | -7.027497 | -2.579675 | -2.559501 |

**INT6b**

|    |           |           |           |   |           |           |           |
|----|-----------|-----------|-----------|---|-----------|-----------|-----------|
| 45 | -0.634876 | 0.027349  | -1.560570 | 6 | -1.800352 | -2.074334 | 1.085943  |
| 17 | 1.449841  | -0.643364 | 1.122503  | 6 | -0.966972 | -3.113379 | 0.651316  |
| 6  | 1.158401  | -0.488927 | -2.776500 | 6 | -2.333254 | -2.135486 | 2.382117  |
| 6  | 0.956614  | 0.887934  | -2.808548 | 6 | -0.674231 | -4.188409 | 1.488662  |
| 6  | 2.270079  | -1.201428 | -2.025281 | 1 | -0.534906 | -3.061725 | -0.342259 |
| 1  | 0.770971  | -1.067183 | -3.613245 | 6 | -2.033744 | -3.208062 | 3.223090  |
| 1  | -0.414116 | -1.567338 | -1.598141 | 1 | -2.971368 | -1.336786 | 2.744111  |
| 1  | 1.542294  | 1.564413  | -2.193914 | 6 | -1.203399 | -4.237519 | 2.779539  |
| 1  | 0.451194  | 1.346511  | -3.653758 | 1 | -0.023839 | -4.983914 | 1.134658  |
| 1  | 3.166444  | -1.238545 | -2.670465 | 1 | -2.449122 | -3.235405 | 4.226760  |
| 1  | 1.989997  | -2.250966 | -1.870000 | 1 | -0.966778 | -5.069865 | 3.436537  |
| 14 | 2.933433  | -0.629594 | -0.357143 | 1 | -5.278309 | 2.875039  | 1.611846  |
| 6  | 4.197795  | -1.898006 | 0.190851  | 1 | -3.698525 | 3.620630  | 3.380754  |
| 6  | 3.796843  | -3.161543 | 0.660816  | 1 | -4.693454 | 0.972343  | 0.145802  |
| 6  | 5.572681  | -1.630452 | 0.087580  | 6 | 0.867289  | 3.847770  | 1.432066  |
| 6  | 4.739416  | -4.127369 | 1.009236  | 6 | 0.049954  | 4.926517  | 1.777478  |
| 1  | 2.738067  | -3.384712 | 0.772320  | 6 | -1.176113 | 5.102302  | 1.129664  |
| 6  | 6.519298  | -2.596188 | 0.434711  | 6 | -1.585151 | 4.206872  | 0.146897  |
| 1  | 5.906644  | -0.655982 | -0.259482 | 6 | -0.771567 | 3.111330  | -0.199180 |
| 6  | 6.103256  | -3.845932 | 0.894617  | 6 | 0.460358  | 2.943872  | 0.455754  |
| 1  | 4.412963  | -5.097170 | 1.375040  | 1 | 1.825402  | 3.705964  | 1.922577  |
|    |           |           |           | 1 | 0.365639  | 5.627531  | 2.545393  |
|    |           |           |           | 1 | -1.818221 | 5.937327  | 1.396748  |

|              |           |           |           |    |           |           |           |
|--------------|-----------|-----------|-----------|----|-----------|-----------|-----------|
| 1            | -2.544892 | 4.326080  | -0.344667 | 6  | -5.975676 | -0.748941 | 3.270496  |
| 1            | 1.077792  | 2.092632  | 0.201261  | 6  | -7.069035 | -0.530961 | 2.464259  |
| 6            | -1.217446 | 2.173506  | -1.186855 | 1  | -7.793510 | -0.406215 | 0.423981  |
| 6            | -1.878947 | 1.670754  | -2.121684 | 1  | -5.600406 | -0.845838 | -0.593136 |
| 1            | -2.568661 | 1.663021  | -2.945537 | 6  | -3.258492 | -1.302214 | 0.720591  |
| 1            | 6.838499  | -4.597820 | 1.168278  | 6  | -3.569590 | -1.281197 | 3.522749  |
| 6            | 3.698995  | 1.075567  | -0.376114 | 1  | -6.071187 | -0.720117 | 4.352994  |
| 6            | 4.154433  | 1.650605  | -1.574542 | 1  | -8.041194 | -0.326765 | 2.903755  |
| 6            | 3.895904  | 1.788289  | 0.819678  | 6  | -2.345063 | -1.547627 | 2.961867  |
| 6            | 4.773668  | 2.901633  | -1.581744 | 6  | -2.167726 | -1.553812 | 1.552193  |
| 1            | 4.012461  | 1.126539  | -2.515697 | 1  | -3.686261 | -1.275864 | 4.603656  |
| 6            | 4.514336  | 3.037654  | 0.816578  | 6  | -4.551684 | -4.833017 | -2.784996 |
| 1            | 3.548837  | 1.366143  | 1.758957  | 6  | -3.947004 | -3.825144 | -3.499079 |
| 6            | 4.950895  | 3.598154  | -0.385914 | 6  | -3.482008 | -2.651757 | -2.850834 |
| 1            | 5.110708  | 3.333749  | -2.519789 | 6  | -3.631463 | -2.518704 | -1.435208 |
| 1            | 4.653489  | 3.576315  | 1.749966  | 6  | -4.261336 | -3.581397 | -0.728967 |
| 1            | 5.426636  | 4.574835  | -0.390165 | 6  | -4.711877 | -4.703744 | -1.385720 |
|              |           |           |           | 1  | -2.766624 | -1.685671 | -4.647573 |
|              |           |           |           | 1  | -4.906280 | -5.726709 | -3.290465 |
|              |           |           |           | 1  | -3.815879 | -3.908892 | -4.574871 |
|              |           |           |           | 6  | -2.869904 | -1.598300 | -3.568918 |
|              |           |           |           | 6  | -3.123045 | -1.350855 | -0.771068 |
|              |           |           |           | 1  | -4.379034 | -3.504336 | 0.344572  |
|              |           |           |           | 1  | -5.188889 | -5.501107 | -0.822843 |
|              |           |           |           | 6  | -2.517882 | -0.333784 | -1.512073 |
|              |           |           |           | 6  | -2.415935 | -0.476228 | -2.923329 |
|              |           |           |           | 1  | -1.497386 | -1.756050 | 3.603648  |
|              |           |           |           | 1  | -1.966942 | 0.316473  | -3.506114 |
|              |           |           |           | 15 | -0.465313 | -1.625969 | 0.843611  |
|              |           |           |           | 15 | -1.662993 | 1.116496  | -0.704411 |
|              |           |           |           | 6  | -0.525354 | -2.954483 | -0.410498 |
|              |           |           |           | 6  | -1.152208 | -4.187496 | -0.182902 |
|              |           |           |           | 6  | 0.071327  | -2.702729 | -1.652561 |
|              |           |           |           | 6  | -1.181733 | -5.154787 | -1.184797 |
|              |           |           |           | 1  | -1.636421 | -4.377936 | 0.770506  |
|              |           |           |           | 6  | 0.035240  | -3.670223 | -2.656082 |
|              |           |           |           | 1  | 0.555192  | -1.744446 | -1.816338 |
|              |           |           |           | 6  | -0.591908 | -4.894961 | -2.424042 |
|              |           |           |           | 1  | -1.685621 | -6.100213 | -1.008604 |
|              |           |           |           | 1  | 0.492975  | -3.464775 | -3.619501 |
|              |           |           |           | 1  | -0.628211 | -5.645285 | -3.208637 |
|              |           |           |           | 6  | 0.597232  | -2.300865 | 2.184840  |
|              |           |           |           | 6  | 0.982916  | -1.425304 | 3.215783  |
|              |           |           |           | 6  | 1.166979  | -3.578218 | 2.138031  |
| <b>INT9a</b> |           |           |           |    |           |           |           |
| 45           | 0.350607  | 0.489052  | 0.191524  |    |           |           |           |
| 6            | 3.769800  | 3.740091  | -1.469511 |    |           |           |           |
| 6            | 4.724400  | 3.632280  | -2.663929 |    |           |           |           |
| 6            | 2.660991  | 2.675817  | -1.508194 |    |           |           |           |
| 1            | 4.340620  | 3.644081  | -0.538779 |    |           |           |           |
| 1            | 3.330163  | 4.745152  | -1.441989 |    |           |           |           |
| 1            | 5.203375  | 2.644852  | -2.691803 |    |           |           |           |
| 1            | 5.517558  | 4.389088  | -2.623088 |    |           |           |           |
| 1            | 2.098196  | 2.771271  | -2.447062 |    |           |           |           |
| 1            | 3.117254  | 1.678238  | -1.541500 |    |           |           |           |
| 14           | 1.394840  | 2.652081  | -0.069600 |    |           |           |           |
| 6            | 2.408412  | 2.905860  | 1.536563  |    |           |           |           |
| 6            | 3.667182  | 2.287143  | 1.682135  |    |           |           |           |
| 6            | 1.925055  | 3.625327  | 2.643584  |    |           |           |           |
| 6            | 4.395013  | 2.366697  | 2.869241  |    |           |           |           |
| 1            | 4.080833  | 1.717468  | 0.856495  |    |           |           |           |
| 6            | 2.644752  | 3.707585  | 3.838357  |    |           |           |           |
| 1            | 0.975083  | 4.145805  | 2.571349  |    |           |           |           |
| 6            | 3.882023  | 3.073720  | 3.958922  |    |           |           |           |
| 1            | 5.362692  | 1.876229  | 2.942666  |    |           |           |           |
| 1            | 2.240509  | 4.274996  | 4.673574  |    |           |           |           |
| 6            | -6.927680 | -0.576896 | 1.057506  |    |           |           |           |
| 6            | -5.701221 | -0.825918 | 0.485421  |    |           |           |           |
| 6            | -4.549928 | -1.054980 | 1.288224  |    |           |           |           |
| 6            | -4.701108 | -1.023786 | 2.710689  |    |           |           |           |



|    |           |           |           |    |           |           |           |
|----|-----------|-----------|-----------|----|-----------|-----------|-----------|
| 6  | 1.274003  | -6.141874 | -0.088244 | 1  | 2.224590  | 0.178084  | -3.285632 |
| 1  | 0.811137  | -5.722481 | -2.152317 | 1  | 1.734112  | 1.587594  | -4.188617 |
| 1  | 1.577299  | -6.279966 | 2.044021  | 1  | -0.299056 | 0.706986  | -3.386188 |
| 1  | 1.699982  | -7.120028 | -0.294291 | 1  | 0.029905  | 2.086487  | -2.333715 |
| 6  | -2.313821 | -2.607845 | 1.085811  | 1  | 3.768527  | 1.976008  | -2.749178 |
| 6  | -2.692209 | -3.072980 | 2.352700  | 1  | 2.470604  | 3.124825  | -2.516663 |
| 6  | -3.178082 | -2.785897 | -0.003475 | 14 | 2.734171  | 1.796355  | -0.486429 |
| 6  | -3.931721 | -3.686393 | 2.532202  | 6  | 4.444285  | 1.390266  | 0.213075  |
| 1  | -2.020386 | -2.968717 | 3.197858  | 6  | 4.551510  | 0.905661  | 1.532492  |
| 6  | -4.405877 | -3.418749 | 0.179994  | 6  | 5.618765  | 1.443779  | -0.553071 |
| 1  | -2.880999 | -2.436837 | -0.987320 | 6  | 5.774164  | 0.491248  | 2.059825  |
| 6  | -4.789124 | -3.863962 | 1.445488  | 1  | 3.663120  | 0.834818  | 2.156277  |
| 1  | -4.219724 | -4.037857 | 3.519477  | 6  | 6.846873  | 1.025756  | -0.034683 |
| 1  | -5.070127 | -3.546431 | -0.668803 | 1  | 5.579084  | 1.806808  | -1.576307 |
| 1  | -5.751862 | -4.348064 | 1.585556  | 6  | 6.927370  | 0.545570  | 1.272477  |
| 6  | 0.048185  | -1.431408 | 2.339477  | 1  | 5.828747  | 0.121366  | 3.080752  |
| 6  | 1.419183  | -1.574838 | 2.620287  | 1  | 7.739426  | 1.071918  | -0.653096 |
| 6  | -0.739741 | -0.690746 | 3.232505  | 15 | -2.073482 | 1.140308  | -0.492937 |
| 6  | 1.976211  | -1.010079 | 3.768382  | 6  | -2.437621 | 2.350467  | -1.835208 |
| 1  | 2.052367  | -2.138201 | 1.942643  | 6  | -2.401154 | 3.737781  | -1.644247 |
| 6  | -0.184449 | -0.132991 | 4.383004  | 6  | -2.663344 | 1.850582  | -3.129559 |
| 1  | -1.793393 | -0.544536 | 3.025150  | 6  | -2.617450 | 4.607037  | -2.715618 |
| 6  | 1.175594  | -0.287589 | 4.654945  | 1  | -2.195605 | 4.145326  | -0.661983 |
| 1  | 3.036932  | -1.137890 | 3.966554  | 6  | -2.894716 | 2.721054  | -4.192652 |
| 1  | -0.815136 | 0.440172  | 5.055713  | 1  | -2.608803 | 0.780975  | -3.310109 |
| 1  | 1.608157  | 0.151558  | 5.549309  | 6  | -2.874465 | 4.102658  | -3.990047 |
| 17 | -1.372398 | -1.596362 | -2.787649 | 1  | -2.584489 | 5.680637  | -2.549585 |
| 6  | 1.707548  | -0.810197 | -0.951162 | 1  | -3.070206 | 2.316727  | -5.185692 |
| 6  | 2.646641  | -1.748908 | -1.478227 | 1  | -3.044923 | 4.780061  | -4.822221 |
| 6  | 3.916759  | -1.918279 | -0.884175 | 6  | -3.746393 | 0.416798  | -0.158379 |
| 6  | 2.296622  | -2.506006 | -2.617508 | 6  | -4.134834 | 0.145217  | 1.163072  |
| 6  | 4.807780  | -2.846813 | -1.409009 | 6  | -4.631936 | 0.089799  | -1.193280 |
| 1  | 4.182134  | -1.318689 | -0.020603 | 6  | -5.381554 | -0.407344 | 1.444360  |
| 6  | 3.205051  | -3.409798 | -3.151906 | 1  | -3.467641 | 0.387646  | 1.981823  |
| 1  | 1.316182  | -2.345781 | -3.056913 | 6  | -5.882436 | -0.460459 | -0.911090 |
| 6  | 4.452987  | -3.586612 | -2.542517 | 1  | -4.359005 | 0.272125  | -2.224048 |
| 1  | 5.781400  | -2.985642 | -0.948873 | 6  | -6.264864 | -0.705980 | 0.407031  |
| 1  | 2.944161  | -3.986491 | -4.034104 | 1  | -5.656425 | -0.613477 | 2.474484  |
| 1  | 5.156494  | -4.303787 | -2.956923 | 1  | -6.557954 | -0.695881 | -1.728982 |
| 6  | 1.718049  | 0.276800  | -0.051609 | 1  | -7.238116 | -1.136924 | 0.624318  |
| 1  | 1.781959  | 0.043358  | 1.014254  | 6  | -1.882566 | 2.191274  | 1.005240  |
| 6  | 1.790192  | 1.175991  | -3.168092 | 6  | -2.914101 | 3.038136  | 1.450461  |
| 6  | 0.368501  | 1.086281  | -2.614235 | 6  | -0.696891 | 2.127626  | 1.740092  |
| 6  | 2.748149  | 2.074578  | -2.357231 | 6  | -2.747189 | 3.811365  | 2.595730  |

|   |           |          |           |    |           |           |           |
|---|-----------|----------|-----------|----|-----------|-----------|-----------|
| 1 | -3.849620 | 3.081475 | 0.901583  | 6  | -1.520069 | -1.490554 | 4.528741  |
| 6 | -0.533356 | 2.892763 | 2.896449  | 6  | -2.749808 | -1.673692 | 2.451662  |
| 1 | 0.093562  | 1.475335 | 1.396082  | 6  | -0.344572 | -1.272299 | 3.808039  |
| 6 | -1.553219 | 3.738497 | 3.322257  | 6  | -0.374427 | -1.253104 | 2.414274  |
| 1 | -3.548541 | 4.466373 | 2.926668  | 6  | -1.572954 | -1.480444 | 1.719919  |
| 1 | 0.398246  | 2.831831 | 3.447788  | 1  | 0.594930  | -1.099007 | 4.321763  |
| 1 | -1.423818 | 4.342916 | 4.216051  | 6  | -3.891541 | 1.684935  | 3.270121  |
| 1 | 7.880787  | 0.216196 | 1.676497  | 6  | -2.513368 | 1.619470  | 3.486169  |
| 6 | 2.070805  | 3.340408 | 0.365679  | 1  | -5.450495 | 1.835167  | 1.788303  |
| 6 | 2.641016  | 3.855003 | 1.541600  | 6  | -4.379693 | 1.801939  | 1.969916  |
| 6 | 0.977818  | 4.032978 | -0.187872 | 6  | -1.633251 | 1.669614  | 2.409215  |
| 6 | 2.134653  | 5.006832 | 2.147671  | 6  | -2.112831 | 1.833476  | 1.097999  |
| 1 | 3.499811  | 3.359045 | 1.985237  | 6  | -3.497085 | 1.884323  | 0.891076  |
| 6 | 0.471478  | 5.185290 | 0.409173  | 1  | 0.529073  | -1.040947 | 1.852547  |
| 1 | 0.505730  | 3.665248 | -1.093588 | 1  | -3.892931 | 1.985824  | -0.112048 |
| 6 | 1.046805  | 5.673471 | 1.583134  | 15 | -1.462894 | -1.614521 | -0.121410 |
| 1 | 2.593545  | 5.386123 | 3.057257  | 15 | -0.900337 | 1.812110  | -0.282739 |
| 1 | -0.375924 | 5.697391 | -0.038126 | 6  | -3.227501 | -1.588036 | -0.672735 |
| 1 | 0.650360  | 6.568852 | 2.054125  | 6  | -4.134061 | -2.607925 | -0.336542 |

**INT8b**

|    |           |           |           |   |           |           |           |
|----|-----------|-----------|-----------|---|-----------|-----------|-----------|
| 45 | 0.014678  | -0.235292 | -1.026187 | 1 | -3.796392 | -3.460815 | 0.243412  |
| 17 | 2.320428  | 0.760976  | -1.625296 | 6 | -5.004905 | -0.461123 | -1.890163 |
| 6  | 1.790416  | -2.748930 | -1.778154 | 1 | -2.978302 | 0.241579  | -1.756856 |
| 6  | 0.697935  | -1.780903 | -2.280721 | 6 | -5.902423 | -1.466093 | -1.531444 |
| 6  | 2.459667  | -2.363266 | -0.440182 | 1 | -6.151351 | -3.338195 | -0.486933 |
| 1  | 1.362451  | -3.747321 | -1.636668 | 1 | -5.327824 | 0.373382  | -2.506824 |
| 1  | 2.572524  | -2.865221 | -2.543881 | 1 | -6.936555 | -1.420763 | -1.861938 |
| 1  | -0.131405 | -2.360989 | -2.694384 | 6 | -1.125118 | -3.429029 | -0.289261 |
| 1  | 1.091386  | -1.172052 | -3.108130 | 6 | -1.505054 | -4.094722 | -1.466024 |
| 1  | 1.712504  | -2.455993 | 0.353871  | 6 | -0.409090 | -4.141770 | 0.681043  |
| 1  | 3.265857  | -3.076380 | -0.203928 | 6 | -1.161481 | -5.428945 | -1.673324 |
| 14 | 3.190455  | -0.644323 | -0.264892 | 1 | -2.078218 | -3.566292 | -2.221114 |
| 6  | 2.958397  | 0.069730  | 1.447615  | 6 | -0.064289 | -5.478316 | 0.473579  |
| 6  | 2.520801  | 1.379871  | 1.693581  | 1 | -0.122534 | -3.656138 | 1.607203  |
| 6  | 3.261397  | -0.749834 | 2.550332  | 6 | -0.432667 | -6.125162 | -0.706036 |
| 6  | 2.377548  | 1.854036  | 2.998544  | 1 | -1.461874 | -5.924956 | -2.592259 |
| 1  | 2.279510  | 2.033739  | 0.864420  | 1 | 0.490575  | -6.013813 | 1.239331  |
| 6  | 3.130292  | -0.275746 | 3.856115  | 1 | -0.162131 | -7.164754 | -0.868384 |
| 1  | 3.602655  | -1.770914 | 2.392272  | 6 | 0.151803  | 3.307120  | 0.070306  |
| 6  | 2.681816  | 1.027879  | 4.081754  | 6 | 0.142102  | 4.038699  | 1.264508  |
| 1  | 2.029334  | 2.869623  | 3.159605  | 6 | 1.025054  | 3.714459  | -0.952650 |
| 1  | 3.373860  | -0.922572 | 4.694898  | 6 | 1.009216  | 5.119519  | 1.445870  |
| 6  | -2.722814 | -1.674529 | 3.846645  | 1 | -0.547109 | 3.777292  | 2.057858  |

|              |           |           |           |    |           |           |           |
|--------------|-----------|-----------|-----------|----|-----------|-----------|-----------|
| 6            | 1.891336  | 4.789743  | -0.771544 | 6  | 5.184894  | -1.027089 | 2.589875  |
| 1            | 1.020751  | 3.190061  | -1.901981 | 1  | 5.043653  | -0.080351 | 0.661963  |
| 6            | 1.895430  | 5.491750  | 0.436033  | 6  | 4.484473  | -1.622009 | 3.642202  |
| 1            | 0.982831  | 5.674272  | 2.380323  | 1  | 2.544954  | -2.185888 | 4.398269  |
| 1            | 2.562275  | 5.079802  | -1.575317 | 1  | 6.265555  | -0.926190 | 2.642332  |
| 1            | 2.573224  | 6.328089  | 0.581553  | 1  | 5.020572  | -1.987230 | 4.513838  |
| 6            | -1.829620 | 2.556786  | -1.702001 | 6  | 3.119851  | 1.429364  | -0.518704 |
| 6            | -1.745797 | 1.944074  | -2.959278 | 6  | 3.857304  | 1.537728  | -1.703081 |
| 6            | -2.544733 | 3.756769  | -1.576115 | 6  | 3.079509  | 2.523556  | 0.361313  |
| 6            | -2.383430 | 2.506445  | -4.067557 | 6  | 4.536341  | 2.721400  | -2.005752 |
| 1            | -1.185969 | 1.013710  | -3.048440 | 1  | 3.903501  | 0.698898  | -2.389457 |
| 6            | -3.189374 | 4.313611  | -2.678923 | 6  | 3.763379  | 3.699369  | 0.062523  |
| 1            | -2.592622 | 4.254645  | -0.612140 | 1  | 2.507803  | 2.444127  | 1.282151  |
| 6            | -3.111285 | 3.688184  | -3.927132 | 6  | 4.491651  | 3.802945  | -1.126760 |
| 1            | -2.310913 | 2.019701  | -5.036262 | 1  | 5.104569  | 2.793098  | -2.929225 |
| 1            | -3.747400 | 5.239431  | -2.568185 | 1  | 3.728796  | 4.536161  | 0.755077  |
| 1            | -3.611501 | 4.126182  | -4.786555 | 1  | 5.021748  | 4.721254  | -1.363230 |
| 1            | 2.572421  | 1.397354  | 5.097841  | 6  | 2.563399  | -1.261761 | -1.394927 |
| 6            | 5.009509  | -0.622918 | -0.707280 | 6  | 3.578854  | -2.220436 | -1.300161 |
| 6            | 5.521055  | -1.501948 | -1.678157 | 6  | 1.798348  | -1.193899 | -2.569970 |
| 6            | 5.895736  | 0.275859  | -0.089804 | 6  | 3.829515  | -3.089951 | -2.364272 |
| 6            | 6.871579  | -1.480502 | -2.025198 | 1  | 4.169975  | -2.297059 | -0.394232 |
| 1            | 4.857636  | -2.209963 | -2.168959 | 6  | 2.058260  | -2.052044 | -3.636319 |
| 6            | 7.247489  | 0.300315  | -0.433445 | 1  | 0.989580  | -0.470056 | -2.625015 |
| 1            | 5.523947  | 0.958037  | 0.670441  | 6  | 3.074799  | -3.005415 | -3.534304 |
| 6            | 7.736415  | -0.578002 | -1.402346 | 1  | 4.614986  | -3.835468 | -2.275300 |
| 1            | 7.250167  | -2.166818 | -2.777841 | 1  | 1.459851  | -1.987265 | -4.541005 |
| 1            | 7.919391  | 1.000844  | 0.055137  | 1  | 3.271183  | -3.683541 | -4.360135 |
| 1            | 8.789530  | -0.561383 | -1.669928 | 17 | -3.641429 | -1.146333 | 2.494075  |
| 1            | -4.578771 | 1.627928  | 4.109680  | 6  | -1.286795 | -2.187243 | -0.837918 |
| 1            | -2.122393 | 1.494739  | 4.490732  | 6  | -0.321316 | -1.717029 | 0.264830  |
| 1            | -0.567967 | 1.564137  | 2.585570  | 6  | -2.779785 | -2.171407 | -0.444148 |
| 1            | -3.647734 | -1.814700 | 4.399597  | 1  | -1.139515 | -1.581844 | -1.740225 |
| 1            | -1.501463 | -1.500390 | 5.615426  | 1  | -1.037199 | -3.217645 | -1.134174 |
| 1            | -3.694899 | -1.806113 | 1.939996  | 1  | 0.612847  | -2.280021 | 0.174786  |
|              |           |           |           | 1  | -0.734137 | -1.956114 | 1.257835  |
|              |           |           |           | 1  | -3.405291 | -2.322243 | -1.334036 |
|              |           |           |           | 1  | -2.985823 | -3.021901 | 0.218959  |
|              |           |           |           | 14 | -3.416432 | -0.640070 | 0.460058  |
|              |           |           |           | 6  | -2.243241 | 0.813284  | 0.399753  |
|              |           |           |           | 6  | -1.775856 | 1.492896  | 1.569840  |
|              |           |           |           | 6  | -1.827305 | 1.287259  | -0.886339 |
|              |           |           |           | 6  | -0.873503 | 2.554846  | 1.458064  |
|              |           |           |           | 1  | -2.118952 | 1.168553  | 2.545534  |
| <b>INT9b</b> |           |           |           |    |           |           |           |
| 45           | -0.023470 | 0.335449  | 0.210735  |    |           |           |           |
| 15           | 2.145189  | -0.064846 | -0.057743 |    |           |           |           |
| 6            | 3.101433  | -0.673934 | 1.394824  |    |           |           |           |
| 6            | 2.405342  | -1.258447 | 2.460882  |    |           |           |           |
| 6            | 4.497461  | -0.554126 | 1.472480  |    |           |           |           |
| 6            | 3.094862  | -1.735102 | 3.576785  |    |           |           |           |
| 1            | 1.322676  | -1.317828 | 2.411224  |    |           |           |           |

|               |           |           |           |    |           |           |           |
|---------------|-----------|-----------|-----------|----|-----------|-----------|-----------|
| 6             | -0.925582 | 2.367493  | -0.989953 | 6  | -5.826907 | -0.730742 | 3.494141  |
| 1             | -2.235799 | 0.842555  | -1.789010 | 6  | -6.968058 | -0.477262 | 2.768655  |
| 6             | -0.417939 | 2.960308  | 0.180595  | 1  | -7.819830 | -0.266766 | 0.785483  |
| 1             | -0.499192 | 3.048920  | 2.348900  | 1  | -5.700674 | -0.679473 | -0.386433 |
| 1             | -0.593069 | 2.710528  | -1.963904 | 6  | -3.286921 | -1.223381 | 0.755158  |
| 1             | 0.333294  | 3.738893  | 0.098858  | 6  | -3.412942 | -1.281702 | 3.570239  |
| 6             | -5.091112 | -0.115393 | -0.188333 | 1  | -5.852073 | -0.741131 | 4.580844  |
| 6             | -5.440378 | 1.243354  | -0.267861 | 1  | -7.908530 | -0.285178 | 3.277101  |
| 6             | -6.034617 | -1.069273 | -0.609141 | 6  | -2.232753 | -1.551378 | 2.922343  |
| 6             | -6.689179 | 1.637145  | -0.749895 | 6  | -2.149501 | -1.528329 | 1.503245  |
| 1             | -4.727822 | 2.000643  | 0.048674  | 1  | -3.456193 | -1.302484 | 4.656343  |
| 6             | -7.284634 | -0.680917 | -1.089205 | 6  | -4.867062 | -4.535898 | -2.855288 |
| 1             | -5.792743 | -2.128353 | -0.559151 | 6  | -4.251869 | -3.517763 | -3.545104 |
| 6             | -7.612671 | 0.674811  | -1.161117 | 6  | -3.724675 | -2.390886 | -2.862201 |
| 1             | -6.941170 | 2.692671  | -0.805614 | 6  | -3.815860 | -2.321191 | -1.436974 |
| 1             | -8.001461 | -1.432412 | -1.408692 | 6  | -4.458778 | -3.392994 | -0.756357 |
| 1             | -8.585267 | 0.979552  | -1.537848 | 6  | -4.974782 | -4.465736 | -1.446434 |
|               |           |           |           | 1  | -3.055848 | -1.358728 | -4.639805 |
|               |           |           |           | 1  | -5.271413 | -5.392325 | -3.387108 |
|               |           |           |           | 1  | -4.162947 | -3.555631 | -4.627707 |
|               |           |           |           | 6  | -3.113785 | -1.320089 | -3.554987 |
|               |           |           |           | 6  | -3.242570 | -1.204114 | -0.741422 |
|               |           |           |           | 1  | -4.536048 | -3.361316 | 0.323141  |
|               |           |           |           | 1  | -5.462928 | -5.270172 | -0.903588 |
|               |           |           |           | 6  | -2.654827 | -0.159988 | -1.458582 |
|               |           |           |           | 6  | -2.614539 | -0.235549 | -2.878090 |
|               |           |           |           | 1  | -1.347176 | -1.787123 | 3.500267  |
|               |           |           |           | 1  | -2.181287 | 0.578432  | -3.443040 |
|               |           |           |           | 15 | -0.490341 | -1.662783 | 0.699283  |
|               |           |           |           | 15 | -1.753056 | 1.236227  | -0.604297 |
|               |           |           |           | 6  | -0.665897 | -2.946128 | -0.589590 |
|               |           |           |           | 6  | -1.395917 | -4.127683 | -0.401901 |
|               |           |           |           | 6  | -0.038945 | -2.716320 | -1.821497 |
|               |           |           |           | 6  | -1.498911 | -5.061565 | -1.430431 |
|               |           |           |           | 1  | -1.904690 | -4.301912 | 0.541249  |
|               |           |           |           | 6  | -0.145068 | -3.649782 | -2.851482 |
|               |           |           |           | 1  | 0.541518  | -1.808938 | -1.963199 |
|               |           |           |           | 6  | -0.878141 | -4.821345 | -2.657815 |
|               |           |           |           | 1  | -2.083953 | -5.963935 | -1.282810 |
|               |           |           |           | 1  | 0.342840  | -3.460402 | -3.803162 |
|               |           |           |           | 1  | -0.969874 | -5.545244 | -3.462352 |
|               |           |           |           | 6  | 0.577016  | -2.426960 | 1.983084  |
|               |           |           |           | 6  | 1.155925  | -1.580966 | 2.943540  |
|               |           |           |           | 6  | 0.887132  | -3.791166 | 2.004960  |
| <b>INT10a</b> |           |           |           |    |           |           |           |
| 45            | 0.369877  | 0.478788  | 0.019226  |    |           |           |           |
| 6             | 3.905199  | 3.479240  | -1.723620 |    |           |           |           |
| 6             | 4.726610  | 3.341227  | -3.009994 |    |           |           |           |
| 6             | 2.713986  | 2.507097  | -1.686862 |    |           |           |           |
| 1             | 4.552445  | 3.299431  | -0.858182 |    |           |           |           |
| 1             | 3.554337  | 4.514196  | -1.619674 |    |           |           |           |
| 1             | 5.119181  | 2.321394  | -3.111551 |    |           |           |           |
| 1             | 5.578129  | 4.032531  | -3.025328 |    |           |           |           |
| 1             | 2.062970  | 2.696561  | -2.551751 |    |           |           |           |
| 1             | 3.083761  | 1.481428  | -1.805030 |    |           |           |           |
| 14            | 1.623562  | 2.522336  | -0.114613 |    |           |           |           |
| 6             | 2.776882  | 2.770886  | 1.384291  |    |           |           |           |
| 6             | 4.007920  | 2.092482  | 1.465726  |    |           |           |           |
| 6             | 2.446444  | 3.621895  | 2.453033  |    |           |           |           |
| 6             | 4.859179  | 2.245628  | 2.559495  |    |           |           |           |
| 1             | 4.294943  | 1.417233  | 0.668864  |    |           |           |           |
| 6             | 3.288084  | 3.772919  | 3.558339  |    |           |           |           |
| 1             | 1.523095  | 4.191770  | 2.421531  |    |           |           |           |
| 6             | 4.498877  | 3.083153  | 3.616941  |    |           |           |           |
| 1             | 5.802067  | 1.705239  | 2.587652  |    |           |           |           |
| 1             | 3.000149  | 4.439000  | 4.368396  |    |           |           |           |
| 6             | -6.917154 | -0.468649 | 1.355118  |    |           |           |           |
| 6             | -5.731943 | -0.702224 | 0.696263  |    |           |           |           |
| 6             | -4.534627 | -0.974479 | 1.413917  |    |           |           |           |
| 6             | -4.593485 | -0.992363 | 2.843260  |    |           |           |           |

|   |           |           |           |               |           |           |           |
|---|-----------|-----------|-----------|---------------|-----------|-----------|-----------|
| 6 | 1.995848  | -2.096926 | 3.926215  | 6             | 2.173622  | -0.296949 | 0.160740  |
| 1 | 0.974069  | -0.512738 | 2.895132  | 1             | 0.271475  | 1.148779  | 1.390264  |
| 6 | 1.750407  | -4.302790 | 2.976549  | 6             | 5.990927  | -1.301005 | 1.236536  |
| 1 | 0.478236  | -4.455505 | 1.252824  | 1             | 6.328217  | -0.260545 | 1.106347  |
| 6 | 2.298664  | -3.460784 | 3.943176  | 6             | 5.522789  | -0.794127 | -1.828892 |
| 1 | 2.441707  | -1.428329 | 4.656500  | 1             | 5.400381  | 0.271212  | -1.575323 |
| 1 | 1.993892  | -5.361596 | 2.972557  | 6             | 4.614172  | -3.562588 | -0.443091 |
| 1 | 2.971507  | -3.859732 | 4.697011  | 1             | 4.635524  | -3.942029 | 0.591197  |
| 6 | -2.972377 | 1.828627  | 0.620963  | 6             | 4.635735  | -1.069434 | -3.054913 |
| 6 | -4.284489 | 2.154495  | 0.250856  | 1             | 4.926635  | -0.434724 | -3.903601 |
| 6 | -2.606282 | 1.900125  | 1.970675  | 1             | 4.721330  | -2.112488 | -3.383682 |
| 6 | -5.202592 | 2.576056  | 1.210572  | 1             | 3.580466  | -0.873845 | -2.833751 |
| 1 | -4.595660 | 2.052698  | -0.784233 | 6             | 7.007900  | -1.018381 | -2.153600 |
| 6 | -3.527817 | 2.310893  | 2.930884  | 1             | 7.307108  | -0.430226 | -3.032445 |
| 1 | -1.605572 | 1.604229  | 2.264537  | 1             | 7.655540  | -0.716871 | -1.323257 |
| 6 | -4.826169 | 2.655551  | 2.551951  | 1             | 7.222791  | -2.069065 | -2.378447 |
| 1 | -6.219453 | 2.815515  | 0.914930  | 6             | 7.236718  | -2.200978 | 1.307241  |
| 1 | -3.235527 | 2.346272  | 3.976198  | 1             | 7.879095  | -1.911747 | 2.150397  |
| 1 | -5.548318 | 2.966267  | 3.300968  | 1             | 6.953686  | -3.249067 | 1.464046  |
| 6 | -1.664869 | 2.515437  | -1.922939 | 1             | 7.845191  | -2.155849 | 0.397906  |
| 6 | -0.680172 | 2.330726  | -2.908534 | 6             | 5.202257  | -1.383451 | 2.554242  |
| 6 | -2.475093 | 3.651865  | -1.985003 | 1             | 5.846576  | -1.147355 | 3.413263  |
| 6 | -0.540640 | 3.235749  | -3.956812 | 1             | 4.355053  | -0.693565 | 2.561140  |
| 1 | -0.008767 | 1.478295  | -2.843447 | 1             | 4.802387  | -2.392717 | 2.711785  |
| 6 | -2.324157 | 4.567232  | -3.028056 | 6             | 5.736066  | -4.267083 | -1.225695 |
| 1 | -3.198252 | 3.850048  | -1.204537 | 1             | 6.730332  | -4.054754 | -0.819468 |
| 6 | -1.370727 | 4.356958  | -4.022231 | 1             | 5.597956  | -5.357193 | -1.211453 |
| 1 | 0.225829  | 3.074289  | -4.709416 | 1             | 5.736810  | -3.957109 | -2.277371 |
| 1 | -2.947240 | 5.456360  | -3.050039 | 6             | 3.238493  | -3.921565 | -1.029029 |
| 1 | -1.257503 | 5.072955  | -4.831168 | 1             | 2.428029  | -3.489486 | -0.438277 |
| 1 | 5.158385  | 3.201798  | 4.472949  | 1             | 3.128679  | -3.547566 | -2.054097 |
| 6 | 0.532170  | 4.081534  | -0.144976 | 1             | 3.096886  | -5.011310 | -1.062846 |
| 6 | 0.660438  | 5.079538  | -1.123978 | 14            | 4.860718  | -1.671618 | -0.261994 |
| 6 | -0.454457 | 4.276049  | 0.837677  |               |           |           |           |
| 6 | -0.149156 | 6.217200  | -1.117394 |               |           |           |           |
| 1 | 1.393156  | 4.966029  | -1.916848 | <b>INT11a</b> |           |           |           |
| 6 | -1.272192 | 5.405181  | 0.853530  | 45            | -0.465885 | 0.619200  | 0.670407  |
| 1 | -0.596019 | 3.521318  | 1.603631  | 6             | -2.777606 | 4.784390  | -0.718511 |
| 6 | -1.118159 | 6.386084  | -0.127761 | 6             | -4.211622 | 5.290984  | -0.529253 |
| 1 | -0.028914 | 6.968765  | -1.893783 | 6             | -2.518229 | 3.475240  | 0.040018  |
| 1 | -2.030725 | 5.512455  | 1.625087  | 1             | -2.587516 | 4.631475  | -1.789863 |
| 1 | -1.751642 | 7.269438  | -0.125704 | 1             | -2.069854 | 5.555500  | -0.388234 |
| 1 | 4.111486  | 3.545994  | -3.895839 | 1             | -4.936461 | 4.548307  | -0.885238 |
| 6 | 3.244102  | -0.896291 | 0.036775  | 1             | -4.388527 | 6.224706  | -1.077117 |
|   |           |           |           | 1             | -2.653613 | 3.625674  | 1.120375  |



|    |           |           |           |    |           |           |           |
|----|-----------|-----------|-----------|----|-----------|-----------|-----------|
| 1  | -3.257646 | 2.721637  | -0.244338 | 15 | -0.089250 | -1.166033 | -0.892808 |
| 14 | -0.787096 | 2.743007  | -0.220523 | 15 | 1.801745  | 0.556059  | 1.402184  |
| 6  | -0.584438 | 2.483187  | -2.096540 | 6  | -0.234539 | -2.779880 | -0.025291 |
| 6  | -1.586743 | 1.740578  | -2.748589 | 6  | -0.007229 | -4.003632 | -0.668913 |
| 6  | 0.486732  | 2.942299  | -2.884097 | 6  | -0.674376 | -2.778267 | 1.304392  |
| 6  | -1.521517 | 1.455663  | -4.111889 | 6  | -0.187031 | -5.201891 | 0.016015  |
| 1  | -2.421184 | 1.357923  | -2.170715 | 1  | 0.313809  | -4.018691 | -1.705094 |
| 6  | 0.553819  | 2.676378  | -4.253061 | 6  | -0.860401 | -3.979132 | 1.988556  |
| 1  | 1.281917  | 3.525108  | -2.432724 | 1  | -0.887902 | -1.833702 | 1.797467  |
| 6  | -0.446752 | 1.923848  | -4.871014 | 6  | -0.611012 | -5.191924 | 1.347179  |
| 1  | -2.297274 | 0.851699  | -4.573038 | 1  | 0.011878  | -6.144207 | -0.485351 |
| 1  | 1.392922  | 3.050692  | -4.834635 | 1  | -1.202905 | -3.963502 | 3.019106  |
| 6  | 6.476960  | -1.408609 | -1.357048 | 1  | -0.750957 | -6.128632 | 1.879014  |
| 6  | 5.241921  | -1.635211 | -0.792179 | 6  | -1.098697 | -1.549983 | -2.386107 |
| 6  | 4.052652  | -1.178716 | -1.422547 | 6  | -2.484700 | -1.353772 | -2.318951 |
| 6  | 4.173350  | -0.457221 | -2.652154 | 6  | -0.551104 | -2.143208 | -3.532947 |
| 6  | 5.460771  | -0.222776 | -3.198374 | 6  | -3.302038 | -1.729326 | -3.384087 |
| 6  | 6.591712  | -0.692822 | -2.570550 | 1  | -2.914913 | -0.897969 | -1.435523 |
| 1  | 7.371451  | -1.775148 | -0.861390 | 6  | -1.370557 | -2.505593 | -4.602083 |
| 1  | 5.167749  | -2.172757 | 0.145309  | 1  | 0.517440  | -2.313816 | -3.603409 |
| 6  | 2.750243  | -1.405548 | -0.863928 | 6  | -2.748952 | -2.299152 | -4.531980 |
| 6  | 2.997296  | 0.022073  | -3.282080 | 1  | -4.374434 | -1.571321 | -3.315071 |
| 1  | 5.534910  | 0.334912  | -4.128476 | 1  | -0.929225 | -2.953737 | -5.488101 |
| 1  | 7.572166  | -0.513081 | -3.002245 | 1  | -3.386798 | -2.584865 | -5.363825 |
| 6  | 1.758586  | -0.251287 | -2.763087 | 6  | 3.236669  | 1.288256  | 0.539360  |
| 6  | 1.616878  | -1.006529 | -1.564251 | 6  | 4.556175  | 1.008889  | 0.925920  |
| 1  | 3.084669  | 0.614583  | -4.188810 | 6  | 3.006507  | 2.141565  | -0.541171 |
| 6  | 3.262635  | -6.192587 | 1.014588  | 6  | 5.622268  | 1.598671  | 0.252045  |
| 6  | 2.953027  | -5.406984 | 2.100275  | 1  | 4.746717  | 0.310710  | 1.735581  |
| 6  | 2.759937  | -4.008643 | 1.954491  | 6  | 4.073029  | 2.730524  | -1.216779 |
| 6  | 2.881856  | -3.414396 | 0.659398  | 1  | 1.992621  | 2.322693  | -0.860247 |
| 6  | 3.204194  | -4.255502 | -0.441016 | 6  | 5.382285  | 2.462983  | -0.819446 |
| 6  | 3.392009  | -5.607272 | -0.267467 | 1  | 6.641096  | 1.365265  | 0.545819  |
| 1  | 2.362890  | -3.623393 | 4.043914  | 1  | 3.877449  | 3.386939  | -2.059700 |
| 1  | 3.407550  | -7.262116 | 1.136828  | 1  | 6.216747  | 2.912186  | -1.349948 |
| 1  | 2.848568  | -5.844963 | 3.089527  | 6  | 1.922498  | 1.200531  | 3.127934  |
| 6  | 2.441996  | -3.178740 | 3.055168  | 6  | 0.834949  | 0.963648  | 3.985944  |
| 6  | 2.641154  | -2.013496 | 0.498496  | 6  | 3.001833  | 1.955398  | 3.600926  |
| 1  | 3.292858  | -3.816212 | -1.427672 | 6  | 0.837935  | 1.451709  | 5.290901  |
| 1  | 3.635131  | -6.232598 | -1.121768 | 1  | -0.028992 | 0.419818  | 3.614990  |
| 6  | 2.310575  | -1.226855 | 1.604255  | 6  | 2.997999  | 2.455204  | 4.905158  |
| 6  | 2.231080  | -1.832087 | 2.886680  | 1  | 3.833983  | 2.184027  | 2.946713  |
| 1  | 0.876175  | 0.124658  | -3.264733 | 6  | 1.921243  | 2.202232  | 5.754385  |
| 1  | 1.991703  | -1.223091 | 3.748983  | 1  | -0.012743 | 1.259751  | 5.938483  |

|   |           |           |           |              |           |           |           |
|---|-----------|-----------|-----------|--------------|-----------|-----------|-----------|
| 1 | 3.838756  | 3.049464  | 5.252346  | 6            | -4.232925 | -3.103089 | 0.426019  |
| 1 | 1.919418  | 2.595444  | 6.766963  | 1            | -3.300873 | -2.646483 | 0.088804  |
| 1 | -0.389525 | 1.702650  | -5.933481 | 1            | -4.150593 | -3.237302 | 1.510677  |
| 6 | 0.433359  | 4.077047  | 0.353344  | 1            | -4.301690 | -4.103658 | -0.023169 |
| 6 | 0.990819  | 4.059611  | 1.641580  | 14           | -5.349379 | -0.451189 | 0.709548  |
| 6 | 0.769087  | 5.163445  | -0.478091 |              |           |           |           |
| 6 | 1.881443  | 5.044507  | 2.069655  | <b>L</b>     |           |           |           |
| 1 | 0.728600  | 3.260262  | 2.322690  | 15           | 0.001063  | -0.000442 | -1.276325 |
| 6 | 1.659003  | 6.153432  | -0.058741 | 6            | -0.742764 | 1.472149  | -0.447675 |
| 1 | 0.327285  | 5.244316  | -1.466398 | 6            | -1.908979 | 2.007514  | -1.017171 |
| 6 | 2.229714  | 6.089459  | 1.213874  | 6            | -0.216676 | 2.073710  | 0.704237  |
| 1 | 2.303835  | 4.986785  | 3.069157  | 6            | -2.544662 | 3.105966  | -0.440016 |
| 1 | 1.904754  | 6.976362  | -0.725355 | 1            | -2.319122 | 1.558064  | -1.918307 |
| 1 | 2.930198  | 6.854667  | 1.538031  | 6            | -0.846883 | 3.180497  | 1.275590  |
| 1 | -4.423808 | 5.476868  | 0.530862  | 1            | 0.685468  | 1.674316  | 1.155640  |
| 6 | -3.609332 | 0.071340  | 0.644182  | 6            | -2.012650 | 3.697056  | 0.708043  |
| 6 | -2.411545 | 0.362400  | 0.590295  | 1            | -3.449202 | 3.505741  | -0.890132 |
| 1 | -0.757065 | 1.740178  | 1.768935  | 1            | -0.427197 | 3.637577  | 2.167787  |
| 6 | -6.364117 | 0.722556  | -0.418166 | 1            | -2.501761 | 4.558231  | 1.154743  |
| 1 | -6.514392 | 1.636769  | 0.177062  | 6            | 1.647911  | -0.092665 | -0.446403 |
| 6 | -5.895566 | -0.246115 | 2.530013  | 6            | 1.905475  | -0.848842 | 0.705828  |
| 1 | -5.552336 | 0.772207  | 2.770835  | 6            | 2.695174  | 0.648454  | -1.016430 |
| 6 | -5.461822 | -2.253048 | 0.058298  | 6            | 3.179140  | -0.856610 | 1.277114  |
| 1 | -5.473395 | -2.153285 | -1.039512 | 1            | 1.108616  | -1.431215 | 1.156593  |
| 6 | -5.140898 | -1.210094 | 3.461494  | 6            | 3.964219  | 0.649804  | -0.439144 |
| 1 | -5.339196 | -0.975112 | 4.516558  | 1            | 2.511528  | 1.227369  | -1.918339 |
| 1 | -5.450788 | -2.249318 | 3.297428  | 6            | 4.209692  | -0.105791 | 0.709390  |
| 1 | -4.058491 | -1.154225 | 3.299540  | 1            | 3.365141  | -1.448662 | 2.169260  |
| 6 | -7.410240 | -0.294833 | 2.786845  | 1            | 4.762949  | 1.232514  | -0.889810 |
| 1 | -7.630541 | -0.120437 | 3.849355  | 1            | 5.200064  | -0.113035 | 1.156034  |
| 1 | -7.945262 | 0.469670  | 2.213061  | 6            | -0.903259 | -1.379976 | -0.447095 |
| 1 | -7.838775 | -1.268410 | 2.523737  | 6            | -1.693986 | -1.222516 | 0.699890  |
| 6 | -7.747869 | 0.173477  | -0.806910 | 6            | -0.779795 | -2.658922 | -1.012716 |
| 1 | -8.312525 | 0.914859  | -1.388899 | 6            | -2.339343 | -2.320894 | 1.270746  |
| 1 | -7.651983 | -0.721824 | -1.433436 | 1            | -1.803042 | -0.240223 | 1.147769  |
| 1 | -8.355948 | -0.096183 | 0.062433  | 6            | -1.415081 | -3.757664 | -0.435963 |
| 6 | -5.588161 | 1.117762  | -1.686001 | 1            | -0.180166 | -2.791132 | -1.910083 |
| 1 | -6.168810 | 1.818405  | -2.301969 | 6            | -2.199345 | -3.590144 | 0.707466  |
| 1 | -4.631385 | 1.588324  | -1.446447 | 1            | -2.950224 | -2.184146 | 2.159104  |
| 1 | -5.374224 | 0.240944  | -2.310877 | 1            | -1.305663 | -4.741959 | -0.882973 |
| 6 | -6.751447 | -2.986434 | 0.470193  | 1            | -2.702468 | -4.443574 | 1.153433  |
| 1 | -7.657756 | -2.433727 | 0.204431  |              |           |           |           |
| 1 | -6.809684 | -3.971376 | -0.013445 | <b>TS10a</b> |           |           |           |
| 1 | -6.775629 | -3.158935 | 1.552468  | 45           | -1.177654 | 0.363080  | 1.046514  |

|    |           |           |           |    |           |           |           |
|----|-----------|-----------|-----------|----|-----------|-----------|-----------|
| 17 | -0.747590 | 2.221882  | 2.689856  | 1  | 6.538404  | 3.359857  | -0.745127 |
| 6  | -2.203396 | -1.588803 | 3.300420  | 6  | 3.891179  | 3.147216  | -1.154552 |
| 6  | -2.492058 | -0.251941 | 2.619728  | 6  | 2.853897  | 0.536406  | -0.826323 |
| 6  | -1.797287 | -2.674272 | 2.283007  | 1  | 4.803229  | -1.254964 | -0.154601 |
| 1  | -1.421219 | -1.468801 | 4.049493  | 1  | 7.184869  | -0.793754 | 0.162950  |
| 1  | -3.101487 | -1.901163 | 3.854907  | 6  | 1.995828  | 1.606379  | -1.101312 |
| 1  | -2.450430 | 0.580494  | 3.318647  | 6  | 2.547635  | 2.907420  | -1.274695 |
| 1  | -3.489486 | -0.252219 | 2.166208  | 1  | 0.844662  | -3.248732 | 1.154219  |
| 1  | -0.735018 | -2.907397 | 2.389162  | 1  | 1.888022  | 3.736077  | -1.491648 |
| 1  | -2.347333 | -3.612420 | 2.425131  | 15 | 1.052888  | -0.420348 | 1.711707  |
| 14 | -2.162047 | -1.950338 | 0.566157  | 15 | 0.136606  | 1.477744  | -1.043200 |
| 6  | -1.432290 | -3.015493 | -0.806777 | 6  | 2.438148  | 0.771301  | 2.066851  |
| 6  | -0.922046 | -2.539374 | -2.020157 | 6  | 3.651197  | 0.236222  | 2.529057  |
| 6  | -1.510498 | -4.409677 | -0.630170 | 6  | 2.333657  | 2.156265  | 1.909530  |
| 6  | -0.498037 | -3.413407 | -3.021834 | 6  | 4.732865  | 1.064002  | 2.817780  |
| 1  | -0.828501 | -1.475524 | -2.184896 | 1  | 3.758199  | -0.834255 | 2.662922  |
| 6  | -1.088198 | -5.290360 | -1.625001 | 6  | 3.415631  | 2.984608  | 2.204260  |
| 1  | -1.914324 | -4.815035 | 0.294589  | 1  | 1.407891  | 2.591394  | 1.566775  |
| 6  | -0.580104 | -4.791557 | -2.827400 | 6  | 4.618466  | 2.444593  | 2.657104  |
| 1  | -0.089681 | -3.011794 | -3.943319 | 1  | 5.667258  | 0.626569  | 3.156581  |
| 1  | -1.159769 | -6.363421 | -1.465738 | 1  | 3.313083  | 4.057162  | 2.067934  |
| 6  | 3.957059  | -2.133648 | -3.963921 | 1  | 5.461923  | 3.092326  | 2.878309  |
| 6  | 3.573220  | -1.288221 | -2.948022 | 6  | 1.250941  | -1.374583 | 3.281130  |
| 6  | 2.858273  | -1.768211 | -1.811758 | 6  | 0.754693  | -0.710705 | 4.417086  |
| 6  | 2.584640  | -3.169736 | -1.749739 | 6  | 1.952002  | -2.574735 | 3.451058  |
| 6  | 2.997816  | -4.019509 | -2.809229 | 6  | 0.932973  | -1.254549 | 5.687154  |
| 6  | 3.665288  | -3.517115 | -3.900206 | 1  | 0.242499  | 0.240497  | 4.297008  |
| 1  | 4.496128  | -1.734929 | -4.818584 | 6  | 2.116448  | -3.122863 | 4.725354  |
| 1  | 3.821094  | -0.235871 | -3.012368 | 1  | 2.393380  | -3.080568 | 2.600865  |
| 6  | 2.427197  | -0.901806 | -0.741526 | 6  | 1.603851  | -2.469186 | 5.845097  |
| 6  | 1.875249  | -3.678678 | -0.638537 | 1  | 0.543394  | -0.727856 | 6.553668  |
| 1  | 2.758688  | -5.077188 | -2.741809 | 1  | 2.658037  | -4.058020 | 4.838735  |
| 1  | 3.971842  | -4.174171 | -4.708887 | 1  | 1.736888  | -2.895966 | 6.835173  |
| 6  | 1.443979  | -2.840502 | 0.353294  | 6  | -0.304662 | 0.827591  | -2.712850 |
| 6  | 1.744704  | -1.449107 | 0.346403  | 6  | 0.625676  | 0.181184  | -3.530315 |
| 1  | 1.621768  | -4.733002 | -0.609666 | 6  | -1.620398 | 0.985559  | -3.187492 |
| 6  | 7.020422  | 1.322167  | -0.281596 | 6  | 0.250279  | -0.350004 | -4.765089 |
| 6  | 6.168106  | 2.345161  | -0.624028 | 1  | 1.650152  | 0.090449  | -3.208896 |
| 6  | 4.783664  | 2.103527  | -0.820019 | 6  | -1.997042 | 0.450600  | -4.417563 |
| 6  | 4.263565  | 0.782011  | -0.662597 | 1  | -2.340384 | 1.549780  | -2.607106 |
| 6  | 5.175454  | -0.249623 | -0.303147 | 6  | -1.067029 | -0.232941 | -5.205927 |
| 6  | 6.513479  | 0.012117  | -0.119360 | 1  | 0.995932  | -0.855482 | -5.372602 |
| 1  | 4.280704  | 4.152819  | -1.291058 | 1  | -3.018271 | 0.577426  | -4.766128 |
| 1  | 8.078475  | 1.516467  | -0.131000 | 1  | -1.365542 | -0.652536 | -6.162289 |

|              |           |           |           |    |           |           |           |
|--------------|-----------|-----------|-----------|----|-----------|-----------|-----------|
| 6            | -0.424914 | 3.220061  | -1.303410 | 1  | -1.776993 | -0.336618 | -2.808162 |
| 6            | -0.939382 | 3.954950  | -0.231388 | 1  | -2.229212 | 0.577071  | -4.309579 |
| 6            | -0.367505 | 3.821041  | -2.575038 | 1  | -0.557214 | 2.253208  | -3.656722 |
| 6            | -1.404172 | 5.258158  | -0.425321 | 1  | -1.688231 | 2.822460  | -2.321441 |
| 1            | -0.984737 | 3.509135  | 0.753742  | 1  | -4.228894 | 0.121316  | -2.833554 |
| 6            | -0.823506 | 5.122565  | -2.763320 | 1  | -4.163726 | 1.883032  | -2.688709 |
| 1            | 0.032636  | 3.268523  | -3.418270 | 14 | -2.905966 | 0.589087  | -0.761597 |
| 6            | -1.351096 | 5.843725  | -1.687373 | 6  | -3.797730 | -0.971141 | -0.158357 |
| 1            | -1.824476 | 5.800923  | 0.415794  | 6  | -4.748409 | -0.925593 | 0.875375  |
| 1            | -0.774016 | 5.572239  | -3.751261 | 6  | -3.547155 | -2.220053 | -0.749475 |
| 1            | -1.720114 | 6.854476  | -1.838535 | 6  | -5.394674 | -2.081057 | 1.318214  |
| 1            | -0.247466 | -5.473952 | -3.605220 | 1  | -4.982649 | 0.020622  | 1.352482  |
| 6            | -4.037517 | -2.267669 | 0.331130  | 6  | -4.185133 | -3.378786 | -0.313176 |
| 6            | -4.941554 | -2.350928 | 1.402951  | 1  | -2.819440 | -2.298482 | -1.547934 |
| 6            | -4.553004 | -2.487212 | -0.960204 | 6  | -5.107516 | -3.313998 | 0.732770  |
| 6            | -6.297266 | -2.616046 | 1.197115  | 1  | -6.118709 | -2.017564 | 2.126779  |
| 1            | -4.594011 | -2.212838 | 2.420711  | 1  | -3.949849 | -4.331561 | -0.780161 |
| 6            | -5.903619 | -2.754792 | -1.175194 | 1  | -5.599047 | -4.216422 | 1.086413  |
| 1            | -3.882536 | -2.469307 | -1.816125 | 6  | -3.417746 | 1.955937  | 0.446569  |
| 6            | -6.785354 | -2.813143 | -0.093889 | 6  | -3.163068 | 1.860393  | 1.828286  |
| 1            | -6.970297 | -2.669880 | 2.048997  | 6  | -4.065856 | 3.117997  | -0.006833 |
| 1            | -6.267482 | -2.922044 | -2.185858 | 6  | -3.510236 | 2.883918  | 2.708963  |
| 1            | -7.840012 | -3.018431 | -0.256497 | 1  | -2.677507 | 0.978613  | 2.228576  |
| 6            | -2.911975 | 1.058064  | 0.127669  | 6  | -4.427339 | 4.143525  | 0.869021  |
| 6            | -2.611161 | -0.033563 | -0.488562 | 1  | -4.283400 | 3.235267  | -1.063524 |
| 6            | -3.804081 | 2.186427  | 0.156223  | 6  | -4.140694 | 4.034663  | 2.230430  |
| 6            | -4.701878 | 2.385517  | -0.913007 | 1  | -3.289322 | 2.782615  | 3.768464  |
| 6            | -3.790752 | 3.106639  | 1.218125  | 1  | -4.927430 | 5.029632  | 0.486704  |
| 6            | -5.540892 | 3.494305  | -0.930302 | 1  | -4.411796 | 4.835022  | 2.913357  |
| 1            | -4.729164 | 1.661477  | -1.722478 | 6  | 5.626348  | 0.054939  | 2.283299  |
| 6            | -4.645504 | 4.206044  | 1.200537  | 6  | 4.265021  | -0.040048 | 2.101091  |
| 1            | -3.093571 | 2.949861  | 2.033068  | 6  | 3.717866  | -0.676650 | 0.952995  |
| 6            | -5.514546 | 4.409696  | 0.126605  | 6  | 4.627855  | -1.195088 | -0.020704 |
| 1            | -6.221342 | 3.643581  | -1.764120 | 6  | 6.025045  | -1.069011 | 0.187373  |
| 1            | -4.627797 | 4.910810  | 2.027344  | 6  | 6.519836  | -0.462329 | 1.318423  |
| 1            | -6.173568 | 5.273398  | 0.113456  | 1  | 6.016396  | 0.541440  | 3.172895  |
| 1            | -2.735917 | -0.516401 | -1.445865 | 1  | 3.598693  | 0.379101  | 2.843699  |
|              |           |           |           | 6  | 2.300424  | -0.786768 | 0.725998  |
|              |           |           |           | 6  | 4.106484  | -1.794739 | -1.192538 |
| <b>TS11a</b> |           |           |           | 1  | 6.697602  | -1.462472 | -0.570460 |
| 45           | -0.706378 | 0.344776  | -1.740788 | 1  | 7.591973  | -0.374018 | 1.469285  |
| 17           | 0.803283  | -0.285872 | -3.712344 | 6  | 2.755436  | -1.933492 | -1.372002 |
| 6            | -2.280135 | 0.976896  | -3.295036 | 6  | 1.831913  | -1.470868 | -0.392607 |
| 6            | -1.345494 | 2.006572  | -2.952812 | 1  | 4.795502  | -2.137738 | -1.959790 |
| 6            | -3.597263 | 0.960510  | -2.523533 |    |           |           |           |

|    |           |           |           |              |           |           |           |
|----|-----------|-----------|-----------|--------------|-----------|-----------|-----------|
| 6  | 0.889887  | -1.597305 | 5.625507  | 6            | 4.741412  | 2.587997  | -0.052231 |
| 6  | 0.394872  | -0.354428 | 5.307515  | 1            | 2.953006  | 2.742692  | 1.123309  |
| 6  | 0.554222  | 0.176761  | 4.001117  | 6            | 4.496765  | 1.557155  | -2.220226 |
| 6  | 1.259294  | -0.581808 | 3.014902  | 1            | 2.506982  | 0.897853  | -2.735016 |
| 6  | 1.760056  | -1.861509 | 3.378281  | 6            | 5.304660  | 2.155416  | -1.256355 |
| 6  | 1.572511  | -2.358909 | 4.646570  | 1            | 5.364603  | 3.046761  | 0.709523  |
| 1  | -0.492587 | 2.031863  | 4.383063  | 1            | 4.924804  | 1.215897  | -3.158652 |
| 1  | 0.754402  | -2.000864 | 6.624859  | 1            | 6.368409  | 2.284378  | -1.435374 |
| 1  | -0.138842 | 0.236511  | 6.047668  | 6            | 0.352190  | 3.484264  | -0.495688 |
| 6  | 0.019404  | 1.434310  | 3.632753  | 6            | -0.835501 | 4.000539  | 0.040833  |
| 6  | 1.405711  | -0.065134 | 1.687693  | 6            | 1.180902  | 4.351716  | -1.228091 |
| 1  | 2.271860  | -2.453311 | 2.628740  | 6            | -1.165097 | 5.347733  | -0.106611 |
| 1  | 1.945837  | -3.347008 | 4.899038  | 1            | -1.524717 | 3.352894  | 0.557597  |
| 6  | 0.797908  | 1.146906  | 1.341851  | 6            | 0.840825  | 5.694781  | -1.390486 |
| 6  | 0.126207  | 1.896529  | 2.343171  | 1            | 2.093027  | 3.982372  | -1.678803 |
| 1  | 2.378585  | -2.364847 | -2.288786 | 6            | -0.327069 | 6.202546  | -0.821692 |
| 1  | -0.296763 | 2.859395  | 2.095518  | 1            | -2.088117 | 5.713833  | 0.331026  |
| 15 | 0.026768  | -1.657022 | -0.752906 | 1            | 1.497611  | 6.343852  | -1.962934 |
| 15 | 0.760479  | 1.679580  | -0.437828 | 1            | -0.585737 | 7.250753  | -0.942839 |
| 6  | -0.691819 | -2.295932 | 0.828829  |              |           |           |           |
| 6  | -0.615484 | -3.638151 | 1.225974  | <b>TS12a</b> |           |           |           |
| 6  | -1.358435 | -1.396613 | 1.665038  | 6            | 3.864876  | -3.740348 | 2.566186  |
| 6  | -1.179614 | -4.055852 | 2.430686  | 6            | 3.399447  | -2.895558 | 1.584804  |
| 1  | -0.140133 | -4.373840 | 0.592137  | 6            | 2.973743  | -1.573656 | 1.892933  |
| 6  | -1.927491 | -1.809200 | 2.864791  | 6            | 3.038488  | -1.147829 | 3.257112  |
| 1  | -1.413910 | -0.358396 | 1.370543  | 6            | 3.510067  | -2.046449 | 4.249133  |
| 6  | -1.836332 | -3.143304 | 3.255769  | 6            | 3.918458  | -3.316700 | 3.914649  |
| 1  | -1.110319 | -5.101142 | 2.718917  | 1            | 4.186222  | -4.744500 | 2.304438  |
| 1  | -2.440610 | -1.087245 | 3.492268  | 1            | 3.349923  | -3.236838 | 0.558040  |
| 1  | -2.278188 | -3.470229 | 4.192520  | 6            | 2.475896  | -0.675496 | 0.891510  |
| 6  | -0.012378 | -3.142147 | -1.844216 | 6            | 2.631735  | 0.169035  | 3.579319  |
| 6  | -0.861297 | -3.163889 | -2.955853 | 1            | 3.545792  | -1.706512 | 5.281090  |
| 6  | 0.778671  | -4.274349 | -1.585051 | 1            | 4.282814  | -3.994792 | 4.681036  |
| 6  | -0.960951 | -4.300543 | -3.758028 | 6            | 2.175540  | 1.023559  | 2.606350  |
| 1  | -1.419536 | -2.272607 | -3.213473 | 6            | 2.083377  | 0.616421  | 1.248689  |
| 6  | 0.687351  | -5.408523 | -2.390088 | 1            | 2.694377  | 0.501132  | 4.612698  |
| 1  | 1.492272  | -4.262416 | -0.768152 | 6            | 6.158486  | -1.503165 | -2.616710 |
| 6  | -0.192346 | -5.428673 | -3.473916 | 6            | 4.975389  | -1.758941 | -3.269345 |
| 1  | -1.625357 | -4.293048 | -4.617164 | 6            | 3.732986  | -1.656200 | -2.591470 |
| 1  | 1.309396  | -6.272466 | -2.173648 | 6            | 3.707068  | -1.264383 | -1.216317 |
| 1  | -0.263581 | -6.311808 | -4.102512 | 6            | 4.949910  | -0.994917 | -0.578191 |
| 6  | 2.567894  | 1.791950  | -0.780396 | 6            | 6.140875  | -1.121257 | -1.255441 |
| 6  | 3.382784  | 2.411211  | 0.183003  | 1            | 2.524519  | -2.239086 | -4.287314 |
| 6  | 3.130324  | 1.374888  | -1.988643 | 1            | 7.104798  | -1.590736 | -3.142719 |

|    |           |           |           |    |           |           |           |
|----|-----------|-----------|-----------|----|-----------|-----------|-----------|
| 1  | 4.970927  | -2.050094 | -4.316518 | 1  | 0.232709  | -3.516009 | 4.766206  |
| 6  | 2.509126  | -1.940287 | -3.242400 | 6  | -1.521717 | -2.313693 | -1.398975 |
| 6  | 2.448010  | -1.142323 | -0.533492 | 6  | -1.972447 | -1.841850 | -2.644879 |
| 1  | 4.953521  | -0.680840 | 0.457644  | 6  | -2.008611 | -3.535619 | -0.923688 |
| 1  | 7.075587  | -0.913051 | -0.742610 | 6  | -2.852677 | -2.599485 | -3.413483 |
| 6  | 1.264548  | -1.459142 | -1.204220 | 1  | -1.655541 | -0.865375 | -2.999017 |
| 6  | 1.317933  | -1.857032 | -2.567826 | 6  | -2.904587 | -4.283971 | -1.689088 |
| 17 | -1.227448 | 2.498248  | -2.916323 | 1  | -1.736969 | -3.888622 | 0.062048  |
| 1  | 1.883057  | 2.030423  | 2.878017  | 6  | -3.319759 | -3.827344 | -2.937933 |
| 1  | 0.400769  | -2.102512 | -3.086672 | 1  | -3.186635 | -2.219556 | -4.374753 |
| 15 | 1.269844  | 1.731692  | 0.006794  | 1  | -3.293690 | -5.216170 | -1.290876 |
| 15 | -0.404849 | -1.214540 | -0.429709 | 1  | -4.020510 | -4.410472 | -3.528576 |
| 6  | 2.537930  | 1.827758  | -1.310003 | 45 | -0.970119 | 0.907851  | -0.386135 |
| 6  | 3.892700  | 2.002722  | -0.987279 | 1  | -0.965482 | 0.992306  | -1.957085 |
| 6  | 2.162350  | 1.684039  | -2.650470 | 14 | -3.278636 | 0.452953  | -0.426861 |
| 6  | 4.856328  | 2.035599  | -1.991595 | 6  | -4.045302 | -1.087059 | 0.348331  |
| 1  | 4.194003  | 2.085413  | 0.052983  | 6  | -3.635041 | -1.584438 | 1.597793  |
| 6  | 3.133168  | 1.706711  | -3.652274 | 6  | -4.992155 | -1.844536 | -0.362614 |
| 1  | 1.116954  | 1.567928  | -2.906949 | 6  | -4.127737 | -2.783110 | 2.111302  |
| 6  | 4.478205  | 1.878882  | -3.326909 | 1  | -2.897396 | -1.043636 | 2.175241  |
| 1  | 5.903700  | 2.154522  | -1.730973 | 6  | -5.497139 | -3.041536 | 0.145279  |
| 1  | 2.832331  | 1.583749  | -4.688633 | 1  | -5.336888 | -1.503822 | -1.331094 |
| 1  | 5.232901  | 1.885012  | -4.108113 | 6  | -5.063283 | -3.519272 | 1.382355  |
| 6  | 1.300579  | 3.382439  | 0.814356  | 1  | -3.773727 | -3.142200 | 3.074266  |
| 6  | 0.322650  | 3.644528  | 1.788118  | 1  | -6.224984 | -3.606088 | -0.431775 |
| 6  | 2.215644  | 4.391466  | 0.484981  | 1  | -5.450173 | -4.456208 | 1.774655  |
| 6  | 0.299602  | 4.866351  | 2.458040  | 6  | -3.294035 | 1.951306  | 0.733562  |
| 1  | -0.431449 | 2.895426  | 2.015308  | 6  | -2.958993 | 3.217240  | 0.194489  |
| 6  | 2.173079  | 5.623505  | 1.138867  | 6  | -3.487142 | 1.869599  | 2.130671  |
| 1  | 2.956127  | 4.220668  | -0.287263 | 6  | -2.866139 | 4.348838  | 1.009257  |
| 6  | 1.226355  | 5.859393  | 2.136111  | 1  | -2.783176 | 3.321292  | -0.872423 |
| 1  | -0.458557 | 5.046049  | 3.213032  | 6  | -3.396724 | 2.999236  | 2.941347  |
| 1  | 2.884481  | 6.398586  | 0.867745  | 1  | -3.756158 | 0.917864  | 2.578402  |
| 1  | 1.200352  | 6.816643  | 2.649197  | 6  | -3.093307 | 4.244716  | 2.380338  |
| 6  | -0.219250 | -1.994501 | 1.217351  | 1  | -2.607514 | 5.307266  | 0.568675  |
| 6  | 0.228722  | -3.312688 | 1.371852  | 1  | -3.580692 | 2.914951  | 4.009595  |
| 6  | -0.477197 | -1.224458 | 2.358182  | 1  | -3.034576 | 5.126726  | 3.012514  |
| 6  | 0.373416  | -3.862246 | 2.644898  | 6  | -4.247269 | 0.882719  | -2.014235 |
| 1  | 0.489946  | -3.902541 | 0.498832  | 1  | -3.649676 | 1.640078  | -2.534379 |
| 6  | -0.316964 | -1.767254 | 3.630149  | 1  | -4.284388 | 0.004675  | -2.669357 |
| 1  | -0.782898 | -0.188864 | 2.237479  | 6  | -5.621683 | 1.394466  | -1.713123 |
| 6  | 0.099829  | -3.092035 | 3.775471  | 1  | -5.659539 | 2.319503  | -1.136413 |
| 1  | 0.729867  | -4.881784 | 2.753744  | 6  | -6.772829 | 0.815414  | -2.066522 |
| 1  | -0.503666 | -1.152692 | 4.505810  | 1  | -6.795973 | -0.105070 | -2.647083 |

|              |           |           |           |   |           |           |           |
|--------------|-----------|-----------|-----------|---|-----------|-----------|-----------|
| 1            | -7.734595 | 1.242708  | -1.796543 | 6 | 2.506121  | 0.738956  | 3.745737  |
|              |           |           |           | 6 | 2.649893  | 0.018702  | 1.020036  |
| <b>TS13a</b> |           |           |           | 1 | 4.508567  | -1.923568 | 0.560023  |
| 45           | -1.060642 | 0.298427  | -0.370771 | 1 | 5.961930  | -2.992569 | 2.223123  |
| 15           | 0.181902  | -1.589078 | -0.248262 | 6 | 1.789051  | 1.037384  | 1.436442  |
| 15           | 0.578204  | 1.767899  | 0.244975  | 6 | 1.731672  | 1.384181  | 2.813449  |
| 6            | -4.957596 | 0.273836  | 1.046858  | 1 | 1.257438  | -2.093808 | -2.950009 |
| 6            | -5.657164 | 1.327003  | 0.432893  | 1 | 1.068755  | 2.180577  | 3.131122  |
| 6            | -6.771033 | 1.909222  | 1.040359  | 6 | 1.645156  | 2.439819  | -1.084574 |
| 6            | -7.220994 | 1.439277  | 2.275233  | 6 | 2.799343  | 3.194142  | -0.834133 |
| 6            | -6.552655 | 0.383456  | 2.898764  | 6 | 1.305166  | 2.121496  | -2.406443 |
| 6            | -5.433835 | -0.186510 | 2.290462  | 6 | 3.602720  | 3.621008  | -1.889813 |
| 1            | -7.289766 | 2.727803  | 0.548326  | 1 | 3.082951  | 3.420940  | 0.189863  |
| 1            | -8.090262 | 1.889088  | 2.747511  | 6 | 2.112931  | 2.544957  | -3.460744 |
| 1            | -6.903840 | 0.004797  | 3.855245  | 1 | 0.417016  | 1.527493  | -2.595182 |
| 1            | -4.929017 | -1.012067 | 2.789130  | 6 | 3.263691  | 3.291681  | -3.203873 |
| 14           | -3.496833 | -0.556822 | 0.164142  | 1 | 4.508065  | 4.185333  | -1.686524 |
| 8            | -2.494770 | -0.576632 | 1.905376  | 1 | 1.850739  | 2.277994  | -4.480614 |
| 1            | -2.851964 | 0.149995  | 2.453563  | 1 | 3.902848  | 3.607481  | -4.023391 |
| 1            | -1.610881 | -0.170897 | 1.335722  | 6 | -0.094314 | 3.258473  | 1.087307  |
| 6            | 6.074137  | 1.229375  | -1.218344 | 6 | 0.191869  | 4.570577  | 0.686814  |
| 6            | 4.962370  | 0.825857  | -0.515520 | 6 | -1.068906 | 3.063099  | 2.083302  |
| 6            | 3.935330  | 0.059818  | -1.135360 | 6 | -0.464141 | 5.653380  | 1.277706  |
| 6            | 4.091198  | -0.270023 | -2.518534 | 1 | 0.920848  | 4.749446  | -0.095113 |
| 6            | 5.241459  | 0.173764  | -3.221637 | 6 | -1.710486 | 4.142255  | 2.684919  |
| 6            | 6.218064  | 0.905326  | -2.587527 | 1 | -1.327425 | 2.048873  | 2.373549  |
| 1            | 6.843839  | 1.811446  | -0.719247 | 6 | -1.410450 | 5.446299  | 2.280602  |
| 1            | 4.858750  | 1.097055  | 0.527530  | 1 | -0.231310 | 6.662904  | 0.949783  |
| 6            | 2.764778  | -0.373858 | -0.424737 | 1 | -2.455562 | 3.967082  | 3.456279  |
| 6            | 3.090298  | -1.047496 | -3.146346 | 1 | -1.918539 | 6.290479  | 2.737780  |
| 1            | 5.335744  | -0.082975 | -4.273834 | 6 | -0.480472 | -2.974594 | -1.275489 |
| 1            | 7.097638  | 1.235291  | -3.133082 | 6 | -0.601263 | -4.297800 | -0.829541 |
| 6            | 1.991156  | -1.478814 | -2.445899 | 6 | -1.033374 | -2.635853 | -2.524132 |
| 6            | 1.798579  | -1.146456 | -1.077967 | 6 | -1.237112 | -5.259209 | -1.619855 |
| 1            | 3.209075  | -1.313648 | -4.193893 | 1 | -0.213795 | -4.581023 | 0.141981  |
| 6            | 5.153537  | -1.885486 | 3.903294  | 6 | -1.645070 | -3.599436 | -3.321137 |
| 6            | 4.248973  | -0.928822 | 4.302291  | 1 | -1.016079 | -1.601382 | -2.851388 |
| 6            | 3.413452  | -0.277207 | 3.358544  | 6 | -1.749776 | -4.919311 | -2.870987 |
| 6            | 3.497422  | -0.634601 | 1.975109  | 1 | -1.330359 | -6.277234 | -1.251525 |
| 6            | 4.437428  | -1.634852 | 1.601323  | 1 | -2.060472 | -3.314497 | -4.283978 |
| 6            | 5.249083  | -2.234893 | 2.536321  | 1 | -2.240203 | -5.669797 | -3.484428 |
| 1            | 2.448192  | 1.020004  | 4.794640  | 6 | 0.808263  | -2.456384 | 1.250919  |
| 1            | 5.795028  | -2.371555 | 4.632941  | 6 | 0.350481  | -2.097266 | 2.523104  |
| 1            | 4.164929  | -0.647960 | 5.349273  | 6 | 1.796200  | -3.447246 | 1.140871  |

|              |           |           |           |   |           |           |           |
|--------------|-----------|-----------|-----------|---|-----------|-----------|-----------|
| 6            | 0.876325  | -2.706375 | 3.662922  | 8 | 2.019448  | 0.031197  | -2.219562 |
| 1            | -0.406282 | -1.331437 | 2.623393  | 1 | 2.051130  | 0.675992  | -2.951133 |
| 6            | 2.310234  | -4.065509 | 2.277570  | 1 | 1.154731  | 0.350904  | -1.482282 |
| 1            | 2.177685  | -3.718170 | 0.160628  | 6 | -6.266361 | -0.493214 | 0.621644  |
| 6            | 1.856607  | -3.690268 | 3.543824  | 6 | -4.998257 | -0.572559 | 0.093057  |
| 1            | 0.526903  | -2.400554 | 4.645055  | 6 | -3.876072 | -0.872411 | 0.914889  |
| 1            | 3.085291  | -4.819792 | 2.178190  | 6 | -4.107555 | -1.111158 | 2.305984  |
| 1            | 2.276323  | -4.154288 | 4.431461  | 6 | -5.424558 | -1.008654 | 2.824629  |
| 1            | -5.321825 | 1.690323  | -0.533763 | 6 | -6.485180 | -0.704621 | 2.003410  |
| 6            | -3.097086 | 0.438363  | -1.321970 | 1 | -7.106827 | -0.261741 | -0.026782 |
| 6            | -2.562305 | 1.771269  | -1.103510 | 1 | -4.843257 | -0.397731 | -0.964645 |
| 6            | -3.127080 | -0.051860 | -2.677835 | 6 | -2.538520 | -0.918135 | 0.398527  |
| 6            | -2.183231 | 2.568423  | -2.237149 | 6 | -3.009353 | -1.463755 | 3.124729  |
| 1            | -2.803041 | 2.306566  | -0.184577 | 1 | -5.577856 | -1.182306 | 3.886804  |
| 6            | -2.733835 | 0.735718  | -3.729005 | 1 | -7.490068 | -0.632245 | 2.409757  |
| 1            | -3.527696 | -1.043776 | -2.861152 | 6 | -1.742347 | -1.551136 | 2.603252  |
| 6            | -2.249668 | 2.065069  | -3.508255 | 6 | -1.475902 | -1.249159 | 1.240554  |
| 1            | -1.823274 | 3.579043  | -2.058972 | 1 | -3.183803 | -1.679588 | 4.176076  |
| 1            | -2.824883 | 0.364317  | -4.747171 | 6 | -3.309091 | -3.706723 | -3.864950 |
| 1            | -1.948199 | 2.673561  | -4.356839 | 6 | -2.926599 | -2.464465 | -4.314583 |
| 6            | -3.880558 | -2.391328 | -0.069149 | 6 | -2.615937 | -1.424229 | -3.400470 |
| 1            | -3.979631 | -2.810359 | 0.942620  | 6 | -2.707549 | -1.672588 | -1.993319 |
| 1            | -3.041967 | -2.899028 | -0.551434 | 6 | -3.113328 | -2.966670 | -1.564321 |
| 6            | -5.150675 | -2.579052 | -0.846481 | 6 | -3.399493 | -3.956412 | -2.474709 |
| 1            | -6.051207 | -2.162049 | -0.394222 | 1 | -2.171269 | 0.062449  | -4.907607 |
| 6            | -5.240529 | -3.179150 | -2.036771 | 1 | -3.539988 | -4.498157 | -4.572374 |
| 1            | -6.188351 | -3.260778 | -2.561912 | 1 | -2.852833 | -2.258703 | -5.379717 |
| 1            | -4.367886 | -3.612794 | -2.519016 | 6 | -2.216380 | -0.138001 | -3.839631 |
|              |           |           |           | 6 | -2.367001 | -0.636130 | -1.065786 |
|              |           |           |           | 1 | -3.168223 | -3.173600 | -0.502762 |
|              |           |           |           | 1 | -3.688087 | -4.942776 | -2.123586 |
|              |           |           |           | 6 | -1.950949 | 0.611034  | -1.535683 |
|              |           |           |           | 6 | -1.896266 | 0.846679  | -2.936889 |
|              |           |           |           | 1 | -0.927608 | -1.852875 | 3.247842  |
|              |           |           |           | 1 | -1.596329 | 1.824407  | -3.296584 |
|              |           |           |           | 6 | -2.415717 | 2.137166  | 0.913416  |
|              |           |           |           | 6 | -3.777472 | 2.324497  | 0.639754  |
|              |           |           |           | 6 | -1.975501 | 2.146951  | 2.244308  |
|              |           |           |           | 6 | -4.685019 | 2.516080  | 1.679692  |
|              |           |           |           | 1 | -4.129931 | 2.287323  | -0.386716 |
|              |           |           |           | 6 | -2.885284 | 2.334470  | 3.284639  |
|              |           |           |           | 1 | -0.919839 | 1.992660  | 2.452354  |
|              |           |           |           | 6 | -4.240506 | 2.516063  | 3.003285  |
|              |           |           |           | 1 | -5.741620 | 2.633383  | 1.459558  |
| <b>TS14a</b> |           |           |           |   |           |           |           |
| 45           | 0.874693  | 0.935489  | 0.193039  |   |           |           |           |
| 15           | 0.273587  | -1.224715 | 0.593914  |   |           |           |           |
| 15           | -1.158378 | 1.816635  | -0.379635 |   |           |           |           |
| 6            | 4.164065  | -0.989539 | -0.462779 |   |           |           |           |
| 6            | 3.821292  | -2.176642 | -1.132641 |   |           |           |           |
| 6            | 4.495464  | -3.370925 | -0.876772 |   |           |           |           |
| 6            | 5.535583  | -3.402269 | 0.053907  |   |           |           |           |
| 6            | 5.903237  | -2.230762 | 0.718189  |   |           |           |           |
| 6            | 5.226055  | -1.038974 | 0.458940  |   |           |           |           |
| 1            | 4.201806  | -4.277292 | -1.399934 |   |           |           |           |
| 1            | 6.059696  | -4.332486 | 0.257340  |   |           |           |           |
| 1            | 6.715712  | -2.244953 | 1.439798  |   |           |           |           |
| 1            | 5.526687  | -0.137694 | 0.985259  |   |           |           |           |
| 14           | 3.249071  | 0.613279  | -0.756845 |   |           |           |           |



|   |           |           |           |              |           |           |           |
|---|-----------|-----------|-----------|--------------|-----------|-----------|-----------|
| 1 | -2.537624 | 2.326834  | 4.313926  | 1            | 1.121034  | 4.458081  | 1.546269  |
| 1 | -4.952067 | 2.647367  | 3.813532  | 1            | 3.103799  | 1.704464  | 4.203131  |
| 6 | -1.080577 | 3.393070  | -1.329999 | 1            | 1.751927  | 3.778471  | 3.842442  |
| 6 | -1.961549 | 4.467236  | -1.146983 | 6            | 4.151531  | 1.769129  | -1.970708 |
| 6 | -0.008309 | 3.553820  | -2.225687 | 1            | 4.382160  | 1.219048  | -2.895400 |
| 6 | -1.783522 | 5.659866  | -1.851892 | 1            | 3.486229  | 2.598576  | -2.259352 |
| 1 | -2.782576 | 4.379512  | -0.444672 | 6            | 5.444376  | 2.351206  | -1.378085 |
| 6 | 0.160132  | 4.735938  | -2.942281 | 1            | 6.111343  | 1.528228  | -1.086317 |
| 1 | 0.703472  | 2.741490  | -2.340105 | 1            | 5.202114  | 2.891269  | -0.454684 |
| 6 | -0.729565 | 5.797208  | -2.755059 | 6            | 6.181465  | 3.283748  | -2.343700 |
| 1 | -2.473934 | 6.483781  | -1.692653 | 1            | 7.097888  | 3.685544  | -1.895472 |
| 1 | 0.993561  | 4.836565  | -3.632413 | 1            | 6.461210  | 2.757467  | -3.264790 |
| 1 | -0.594374 | 6.726203  | -3.301544 | 1            | 5.547172  | 4.133217  | -2.626865 |
| 6 | 1.303955  | -1.777768 | 2.011598  |              |           |           |           |
| 6 | 2.239186  | -2.817186 | 1.887793  |              |           |           |           |
| 6 | 1.312061  | -1.007023 | 3.188451  | <b>TS15a</b> |           |           |           |
| 6 | 3.137256  | -3.091347 | 2.917786  | 45           | -0.867001 | 1.178095  | -0.526680 |
| 1 | 2.285878  | -3.399880 | 0.977008  | 17           | -1.009522 | 2.585929  | -2.641638 |
| 6 | 2.185660  | -1.307268 | 4.231427  | 6            | -2.686012 | 3.969394  | -0.725307 |
| 1 | 0.649047  | -0.152945 | 3.278208  | 6            | -1.285233 | 3.412899  | -0.646029 |
| 6 | 3.105627  | -2.348737 | 4.099715  | 6            | -3.747614 | 2.885409  | -0.978806 |
| 1 | 3.866368  | -3.885550 | 2.788421  | 1            | -2.865984 | 4.453614  | 0.248229  |
| 1 | 2.165388  | -0.705600 | 5.135851  | 1            | -2.728013 | 4.760488  | -1.482160 |
| 1 | 3.799318  | -2.571196 | 4.905766  | 1            | -1.169860 | 2.817568  | 0.323664  |
| 6 | 0.187425  | -2.736771 | -0.465124 | 1            | -4.708221 | 3.168121  | -0.532419 |
| 6 | -0.152118 | -3.974629 | 0.103924  | 1            | -3.908366 | 2.799927  | -2.058694 |
| 6 | 0.368191  | -2.655882 | -1.849335 | 14           | -3.220026 | 1.114987  | -0.432383 |
| 6 | -0.272495 | -5.111629 | -0.691523 | 6            | -3.704818 | 0.900958  | 1.400588  |
| 1 | -0.317401 | -4.046791 | 1.174857  | 6            | -4.418887 | -0.187899 | 1.929263  |
| 6 | 0.236328  | -3.793117 | -2.648490 | 6            | -3.206051 | 1.839247  | 2.327164  |
| 1 | 0.610411  | -1.703866 | -2.303058 | 6            | -4.593787 | -0.355784 | 3.305264  |
| 6 | -0.076632 | -5.022656 | -2.072155 | 1            | -4.851663 | -0.923110 | 1.258122  |
| 1 | -0.528500 | -6.064662 | -0.236389 | 6            | -3.382609 | 1.688079  | 3.701468  |
| 1 | 0.363561  | -3.710640 | -3.723867 | 1            | -2.649400 | 2.701936  | 1.968720  |
| 1 | -0.182017 | -5.906463 | -2.695222 | 6            | -4.068860 | 0.576930  | 4.198700  |
| 1 | 3.007928  | -2.169761 | -1.848066 | 1            | -5.140493 | -1.218247 | 3.678016  |
| 6 | 2.934968  | 1.600544  | 0.774883  | 1            | -2.982053 | 2.432650  | 4.385734  |
| 6 | 2.107339  | 2.776281  | 0.582185  | 6            | 5.880790  | -1.669024 | -1.604895 |
| 6 | 3.223273  | 1.219389  | 2.132635  | 6            | 4.768717  | -1.504147 | -0.809158 |
| 6 | 1.710514  | 3.560095  | 1.717007  | 6            | 3.465042  | -1.460373 | -1.372296 |
| 1 | 2.089856  | 3.274256  | -0.385945 | 6            | 3.340884  | -1.557844 | -2.793613 |
| 6 | 2.828076  | 1.994806  | 3.192602  | 6            | 4.504592  | -1.713300 | -3.587329 |
| 1 | 3.773427  | 0.303189  | 2.316317  | 6            | 5.751772  | -1.775975 | -3.007822 |
| 6 | 2.056458  | 3.180788  | 2.987038  | 1            | 6.866638  | -1.708792 | -1.150253 |
|   |           |           |           | 1            | 4.882597  | -1.410493 | 0.263743  |

|    |           |           |           |              |           |           |           |
|----|-----------|-----------|-----------|--------------|-----------|-----------|-----------|
| 6  | 2.283210  | -1.306659 | -0.568257 | 6            | -3.457266 | -4.425834 | -1.658111 |
| 6  | 2.050765  | -1.449892 | -3.374428 | 1            | -4.755738 | -3.590776 | -0.148948 |
| 1  | 4.391319  | -1.779373 | -4.666441 | 1            | -1.927362 | -5.044212 | -3.043783 |
| 1  | 6.636778  | -1.899947 | -3.625357 | 1            | -4.163768 | -5.191700 | -1.965187 |
| 6  | 0.935025  | -1.329415 | -2.588309 | 6            | 2.821907  | 1.752091  | -1.109195 |
| 6  | 1.027919  | -1.322555 | -1.163957 | 6            | 4.170903  | 1.770626  | -0.724131 |
| 1  | 1.959728  | -1.450985 | -4.457547 | 6            | 2.491225  | 1.834925  | -2.466468 |
| 6  | 3.509384  | -3.943270 | 3.725560  | 6            | 5.173605  | 1.862760  | -1.685223 |
| 6  | 3.327938  | -2.640969 | 4.130371  | 1            | 4.431743  | 1.686898  | 0.326912  |
| 6  | 2.992951  | -1.628775 | 3.194179  | 6            | 3.499369  | 1.929689  | -3.427193 |
| 6  | 2.838557  | -1.975219 | 1.815196  | 1            | 1.449557  | 1.812658  | -2.763268 |
| 6  | 3.041756  | -3.327908 | 1.428418  | 6            | 4.838539  | 1.937271  | -3.040172 |
| 6  | 3.367905  | -4.286923 | 2.359451  | 1            | 6.216361  | 1.856629  | -1.381328 |
| 1  | 2.945108  | -0.008415 | 4.623743  | 1            | 3.234559  | 1.980640  | -4.479562 |
| 1  | 3.762069  | -4.711089 | 4.451204  | 1            | 5.622707  | 1.992993  | -3.789825 |
| 1  | 3.433508  | -2.366598 | 5.176844  | 6            | 1.515976  | 3.146360  | 1.060629  |
| 6  | 2.799207  | -0.281485 | 3.581634  | 6            | 0.624365  | 3.313254  | 2.137539  |
| 6  | 2.439207  | -0.974164 | 0.880218  | 6            | 2.292158  | 4.239542  | 0.656874  |
| 1  | 2.922160  | -3.596502 | 0.384782  | 6            | 0.530353  | 4.533488  | 2.802283  |
| 1  | 3.512914  | -5.317042 | 2.046642  | 1            | -0.003097 | 2.483760  | 2.450290  |
| 6  | 2.206776  | 0.335348  | 1.303616  | 6            | 2.184356  | 5.468252  | 1.314635  |
| 6  | 2.423431  | 0.670960  | 2.665413  | 1            | 2.977634  | 4.134878  | -0.176667 |
| 1  | -0.038238 | -1.209803 | -3.052203 | 6            | 1.307997  | 5.619056  | 2.388316  |
| 1  | 2.282553  | 1.693051  | 2.993073  | 1            | -0.157623 | 4.640146  | 3.636571  |
| 15 | -0.565953 | -1.044207 | -0.265873 | 1            | 2.789879  | 6.307326  | 0.983461  |
| 15 | 1.472904  | 1.565250  | 0.118451  | 1            | 1.226927  | 6.574519  | 2.898586  |
| 6  | -0.416799 | -1.673742 | 1.459382  | 1            | -4.198614 | 0.445405  | 5.269545  |
| 6  | -0.160778 | -3.024965 | 1.734405  | 6            | -4.233861 | -0.039926 | -1.528881 |
| 6  | -0.692487 | -0.800747 | 2.515255  | 6            | -5.576471 | -0.363023 | -1.271691 |
| 6  | -0.143429 | -3.482173 | 3.048576  | 6            | -3.642109 | -0.579826 | -2.684230 |
| 1  | 0.025935  | -3.715838 | 0.918383  | 6            | -6.289017 | -1.221809 | -2.111665 |
| 6  | -0.690875 | -1.261641 | 3.832130  | 1            | -6.075678 | 0.056316  | -0.401592 |
| 1  | -0.927077 | 0.234137  | 2.290167  | 6            | -4.346913 | -1.433452 | -3.530248 |
| 6  | -0.408118 | -2.600373 | 4.100554  | 1            | -2.605460 | -0.338525 | -2.904228 |
| 1  | 0.082013  | -4.524277 | 3.254078  | 6            | -5.671694 | -1.766043 | -3.238579 |
| 1  | -0.922767 | -0.574109 | 4.640028  | 1            | -7.324746 | -1.465053 | -1.887102 |
| 1  | -0.401196 | -2.961756 | 5.125239  | 1            | -3.860658 | -1.852785 | -4.407008 |
| 6  | -1.642351 | -2.414284 | -0.896674 | 1            | -6.220769 | -2.442411 | -3.888579 |
| 6  | -2.887079 | -2.542971 | -0.261745 | 1            | -0.463394 | 4.117964  | -0.725525 |
| 6  | -1.302352 | -3.342222 | -1.887686 |              |           |           |           |
| 6  | -3.788723 | -3.530784 | -0.638856 |              |           |           |           |
| 1  | -3.142878 | -1.865564 | 0.542367  |              |           |           |           |
| 6  | -2.208386 | -4.336452 | -2.268434 |              |           |           |           |
| 1  | -0.330567 | -3.312924 | -2.363493 |              |           |           |           |
|    |           |           |           | <b>TS16a</b> |           |           |           |
|    |           |           |           | 45           | -0.675895 | 0.336701  | -1.798567 |
|    |           |           |           | 6            | -2.278783 | 0.880759  | -3.384120 |
|    |           |           |           | 6            | -1.451465 | 1.979138  | -2.999089 |

|    |           |           |           |    |           |           |           |
|----|-----------|-----------|-----------|----|-----------|-----------|-----------|
| 6  | -3.605343 | 0.701613  | -2.653537 | 1  | 4.934447  | -1.901098 | -2.170836 |
| 1  | -1.610102 | -0.426855 | -2.931349 | 6  | 1.110430  | -1.610308 | 5.486795  |
| 1  | -2.182601 | 0.523166  | -4.411283 | 6  | 0.514176  | -0.412260 | 5.168810  |
| 1  | -0.704079 | 2.346183  | -3.695560 | 6  | 0.632655  | 0.133780  | 3.864853  |
| 1  | -1.874394 | 2.732006  | -2.340439 | 6  | 1.400440  | -0.561118 | 2.878483  |
| 1  | -4.113103 | -0.210128 | -2.987479 | 6  | 1.999152  | -1.798370 | 3.239452  |
| 1  | -4.275558 | 1.545232  | -2.859226 | 6  | 1.853864  | -2.311089 | 4.507784  |
| 14 | -2.979054 | 0.416540  | -0.836882 | 1  | -0.586331 | 1.881204  | 4.245325  |
| 6  | -3.819842 | -1.179940 | -0.229787 | 1  | 1.006759  | -2.025261 | 6.485311  |
| 6  | -4.760285 | -1.199220 | 0.813700  | 1  | -0.069915 | 0.130171  | 5.908052  |
| 6  | -3.465799 | -2.417558 | -0.794124 | 6  | -0.009410 | 1.341764  | 3.498077  |
| 6  | -5.297772 | -2.397315 | 1.289136  | 6  | 1.512972  | -0.023773 | 1.555330  |
| 1  | -5.071106 | -0.266305 | 1.274058  | 1  | 2.558272  | -2.346337 | 2.490205  |
| 6  | -3.997035 | -3.618697 | -0.329996 | 1  | 2.307068  | -3.265745 | 4.758650  |
| 1  | -2.735505 | -2.448623 | -1.595117 | 6  | 0.831999  | 1.150396  | 1.219782  |
| 6  | -4.911692 | -3.613291 | 0.725204  | 6  | 0.077335  | 1.826516  | 2.216330  |
| 1  | -6.016639 | -2.380085 | 2.105068  | 1  | 2.528012  | -2.257534 | -2.445410 |
| 1  | -3.683839 | -4.557702 | -0.779744 | 1  | -0.435475 | 2.745103  | 1.964649  |
| 1  | -5.319024 | -4.547589 | 1.102860  | 15 | 0.164808  | -1.608923 | -0.885593 |
| 6  | -3.670305 | 1.771059  | 0.306066  | 15 | 0.718909  | 1.705200  | -0.549468 |
| 6  | -3.393634 | 1.747266  | 1.688740  | 6  | -0.503367 | -2.289545 | 0.703959  |
| 6  | -4.399707 | 2.870724  | -0.177262 | 6  | -0.290506 | -3.607887 | 1.130024  |
| 6  | -3.808074 | 2.770687  | 2.539237  | 6  | -1.260134 | -1.442994 | 1.517709  |
| 1  | -2.830527 | 0.919774  | 2.109061  | 6  | -0.821035 | -4.057554 | 2.338229  |
| 6  | -4.824805 | 3.899427  | 0.667758  | 1  | 0.269164  | -4.303004 | 0.519391  |
| 1  | -4.637138 | 2.933218  | -1.235436 | 6  | -1.793503 | -1.888566 | 2.722373  |
| 6  | -4.525055 | 3.856728  | 2.029878  | 1  | -1.419886 | -0.422867 | 1.195902  |
| 1  | -3.572517 | 2.722384  | 3.599753  | 6  | -1.574663 | -3.199756 | 3.139261  |
| 1  | -5.389290 | 4.735079  | 0.260897  | 1  | -0.648031 | -5.084189 | 2.649343  |
| 1  | -4.848699 | 4.658001  | 2.688672  | 1  | -2.382575 | -1.209789 | 3.331087  |
| 6  | 5.736297  | 0.340776  | 2.051929  | 1  | -1.990794 | -3.552177 | 4.078588  |
| 6  | 4.379116  | 0.157650  | 1.906617  | 6  | 0.165500  | -3.096678 | -1.986102 |
| 6  | 3.843840  | -0.507704 | 0.769847  | 6  | -0.714492 | -3.154376 | -3.072382 |
| 6  | 4.758939  | -0.967621 | -0.227902 | 6  | 1.007359  | -4.199499 | -1.756630 |
| 6  | 6.150348  | -0.756216 | -0.055647 | 6  | -0.787288 | -4.288999 | -3.882113 |
| 6  | 6.635219  | -0.118075 | 1.062686  | 1  | -1.335909 | -2.294021 | -3.292178 |
| 1  | 6.118414  | 0.848852  | 2.932877  | 6  | 0.943574  | -5.330935 | -2.567645 |
| 1  | 3.705600  | 0.528427  | 2.668505  | 1  | 1.741693  | -4.164491 | -0.959375 |
| 6  | 2.429568  | -0.690215 | 0.574935  | 6  | 0.037674  | -5.383747 | -3.628957 |
| 6  | 4.244259  | -1.592457 | -1.389908 | 1  | -1.483593 | -4.309323 | -4.715689 |
| 1  | 6.826874  | -1.107326 | -0.830652 | 1  | 1.606710  | -6.169101 | -2.372676 |
| 1  | 7.703136  | 0.038152  | 1.185660  | 1  | -0.013670 | -6.266379 | -4.260132 |
| 6  | 2.897965  | -1.794773 | -1.539329 | 6  | 2.495370  | 1.865132  | -1.016576 |
| 6  | 1.970339  | -1.382625 | -0.541918 | 6  | 3.391839  | 2.460678  | -0.113907 |

|              |           |           |           |    |          |           |           |
|--------------|-----------|-----------|-----------|----|----------|-----------|-----------|
| 6            | 2.953844  | 1.492981  | -2.281740 | 6  | 4.879730 | -1.670676 | -3.686841 |
| 6            | 4.719956  | 2.671508  | -0.469741 | 6  | 4.312476 | -0.859782 | -2.730103 |
| 1            | 3.046440  | 2.750791  | 0.873761  | 6  | 3.627809 | -1.406886 | -1.606454 |
| 6            | 4.287606  | 1.704472  | -2.638973 | 6  | 3.582082 | -2.830402 | -1.487531 |
| 1            | 2.260905  | 1.020892  | -2.970971 | 6  | 4.176810 | -3.641844 | -2.488525 |
| 6            | 5.172487  | 2.290869  | -1.735907 | 6  | 4.809070 | -3.079520 | -3.571870 |
| 1            | 5.406226  | 3.112794  | 0.246396  | 1  | 5.391116 | -1.223865 | -4.534782 |
| 1            | 4.633779  | 1.399398  | -3.622768 | 1  | 4.388751 | 0.216173  | -2.831257 |
| 1            | 6.211895  | 2.446471  | -2.010833 | 6  | 2.999242 | -0.585064 | -0.604212 |
| 6            | 0.240378  | 3.491694  | -0.501570 | 6  | 2.913608 | -3.401956 | -0.380289 |
| 6            | -1.053403 | 3.848060  | -0.093737 | 1  | 4.106857 | -4.720887 | -2.383377 |
| 6            | 1.094853  | 4.504259  | -0.964903 | 1  | 5.256273 | -3.708966 | -4.335742 |
| 6            | -1.469479 | 5.178242  | -0.101212 | 6  | 2.306637 | -2.607110 | 0.553508  |
| 1            | -1.748627 | 3.082260  | 0.214965  | 6  | 2.365521 | -1.185769 | 0.482089  |
| 6            | 0.672011  | 5.834770  | -0.987631 | 1  | 2.832648 | -4.481368 | -0.310435 |
| 1            | 2.090247  | 4.264102  | -1.314391 | 6  | 6.986753 | 2.568594  | 0.058612  |
| 6            | -0.605370 | 6.179202  | -0.547349 | 6  | 5.959919 | 3.381169  | -0.361121 |
| 1            | -2.474581 | 5.416507  | 0.230647  | 6  | 4.680080 | 2.843058  | -0.652542 |
| 1            | 1.349700  | 6.601948  | -1.352295 | 6  | 4.450411 | 1.440216  | -0.513418 |
| 1            | -0.928701 | 7.216439  | -0.562230 | 6  | 5.538271 | 0.629523  | -0.083861 |
| 1            | 0.528467  | 0.148213  | -2.885551 | 6  | 6.768839 | 1.177898  | 0.196762  |
|              |           |           |           | 1  | 3.776376 | 4.729718  | -1.197887 |
|              |           |           |           | 1  | 7.962212 | 2.989300  | 0.285308  |
|              |           |           |           | 1  | 6.108106 | 4.452507  | -0.469113 |
|              |           |           |           | 6  | 3.605801 | 3.664863  | -1.061550 |
|              |           |           |           | 6  | 3.136187 | 0.899543  | -0.739944 |
|              |           |           |           | 1  | 5.386337 | -0.434700 | 0.042463  |
|              |           |           |           | 1  | 7.578962 | 0.537033  | 0.532863  |
|              |           |           |           | 6  | 2.081144 | 1.753039  | -1.072141 |
|              |           |           |           | 6  | 2.356060 | 3.139153  | -1.256532 |
|              |           |           |           | 1  | 1.747742 | -3.076578 | 1.350203  |
|              |           |           |           | 1  | 1.556950 | 3.806627  | -1.542959 |
|              |           |           |           | 15 | 1.380422 | -0.235484 | 1.718648  |
|              |           |           |           | 15 | 0.287586 | 1.217652  | -1.108448 |
|              |           |           |           | 6  | 2.406758 | 1.268974  | 2.094806  |
|              |           |           |           | 6  | 3.731160 | 1.096000  | 2.527457  |
|              |           |           |           | 6  | 1.875101 | 2.559059  | 2.061981  |
|              |           |           |           | 6  | 4.508787 | 2.189803  | 2.892655  |
|              |           |           |           | 1  | 4.158436 | 0.100201  | 2.574957  |
|              |           |           |           | 6  | 2.653270 | 3.658477  | 2.429814  |
|              |           |           |           | 1  | 0.849601 | 2.697047  | 1.746253  |
|              |           |           |           | 6  | 3.972091 | 3.478277  | 2.842443  |
|              |           |           |           | 1  | 5.538185 | 2.037382  | 3.202158  |
|              |           |           |           | 1  | 2.224035 | 4.655749  | 2.386569  |
| <b>TS17a</b> |           |           |           |    |          |           |           |
| 45           | -0.782162 | 0.097526  | 0.911212  |    |          |           |           |
| 6            | -1.524764 | -1.813654 | 3.354220  |    |          |           |           |
| 6            | -1.844707 | -0.464221 | 2.680919  |    |          |           |           |
| 6            | -0.961666 | -2.876154 | 2.389235  |    |          |           |           |
| 1            | -0.826466 | -1.675875 | 4.180935  |    |          |           |           |
| 1            | -2.448937 | -2.188740 | 3.817352  |    |          |           |           |
| 1            | -1.760184 | 0.351558  | 3.402412  |    |          |           |           |
| 1            | -2.883204 | -0.473178 | 2.338492  |    |          |           |           |
| 1            | 0.127565  | -2.899880 | 2.477044  |    |          |           |           |
| 1            | -1.319602 | -3.883055 | 2.639190  |    |          |           |           |
| 14           | -1.425713 | -2.414743 | 0.603483  |    |          |           |           |
| 6            | -0.479518 | -3.449345 | -0.661297 |    |          |           |           |
| 6            | -0.023089 | -2.948990 | -1.887004 |    |          |           |           |
| 6            | -0.287035 | -4.818131 | -0.398015 |    |          |           |           |
| 6            | 0.607524  | -3.775260 | -2.818947 |    |          |           |           |
| 1            | -0.142547 | -1.897980 | -2.109746 |    |          |           |           |
| 6            | 0.348124  | -5.649833 | -1.319691 |    |          |           |           |
| 1            | -0.644625 | -5.242071 | 0.537726  |    |          |           |           |
| 6            | 0.796827  | -5.127661 | -2.536426 |    |          |           |           |
| 1            | 0.964098  | -3.353995 | -3.753329 |    |          |           |           |
| 1            | 0.487484  | -6.704444 | -1.094233 |    |          |           |           |

|   |           |           |           |              |           |           |           |
|---|-----------|-----------|-----------|--------------|-----------|-----------|-----------|
| 1 | 4.579868  | 4.333524  | 3.124021  | 1            | -5.306638 | -4.338615 | -1.992041 |
| 6 | 1.740681  | -1.012384 | 3.361447  | 1            | -6.744741 | -4.744982 | 0.000076  |
| 6 | 1.112259  | -0.394901 | 4.455549  | 6            | -2.720874 | 0.514642  | 0.070627  |
| 6 | 2.694847  | -2.006073 | 3.609668  | 6            | -2.385884 | -0.619511 | -0.446738 |
| 6 | 1.406087  | -0.783410 | 5.759757  | 14           | -4.132348 | 1.733742  | 0.040928  |
| 1 | 0.396482  | 0.401877  | 4.277415  | 6            | -5.744011 | 0.718873  | 0.270435  |
| 6 | 2.980579  | -2.403316 | 4.918206  | 1            | -5.821867 | 0.147077  | -0.665299 |
| 1 | 3.237153  | -2.464435 | 2.791828  | 6            | -4.144247 | 2.430210  | -1.756238 |
| 6 | 2.335286  | -1.799087 | 5.995815  | 1            | -3.091906 | 2.636264  | -1.975784 |
| 1 | 0.906225  | -0.294729 | 6.591270  | 6            | -3.873054 | 3.015543  | 1.441306  |
| 1 | 3.719675  | -3.180957 | 5.090397  | 1            | -2.796450 | 3.215668  | 1.427515  |
| 1 | 2.562200  | -2.107386 | 7.012365  | 6            | -5.718005 | -0.316850 | 1.404042  |
| 6 | 0.099703  | 0.435117  | -2.763459 | 1            | -4.849444 | -0.972161 | 1.326000  |
| 6 | 1.190180  | 0.012740  | -3.527535 | 1            | -5.699581 | 0.155204  | 2.391328  |
| 6 | -1.196964 | 0.223960  | -3.263522 | 1            | -6.610642 | -0.955733 | 1.361566  |
| 6 | 0.997166  | -0.654547 | -4.738192 | 6            | -6.995407 | 1.609430  | 0.373727  |
| 1 | 2.194297  | 0.202783  | -3.183490 | 1            | -7.089204 | 2.300754  | -0.471016 |
| 6 | -1.390632 | -0.433891 | -4.475185 | 1            | -7.907609 | 0.997549  | 0.401050  |
| 1 | -2.048969 | 0.583222  | -2.705516 | 1            | -6.983261 | 2.209485  | 1.291305  |
| 6 | -0.293398 | -0.890302 | -5.211275 | 6            | -4.614163 | 1.334999  | -2.735969 |
| 1 | 1.863235  | -0.988522 | -5.302888 | 1            | -5.701992 | 1.207531  | -2.691033 |
| 1 | -2.400923 | -0.588278 | -4.843773 | 1            | -4.360143 | 1.606914  | -3.769740 |
| 1 | -0.445625 | -1.414100 | -6.150644 | 1            | -4.167961 | 0.355917  | -2.529445 |
| 6 | -0.534851 | 2.839873  | -1.446139 | 6            | -4.921961 | 3.724749  | -2.043820 |
| 6 | -0.958976 | 3.624319  | -0.368568 | 1            | -4.494622 | 4.584559  | -1.525784 |
| 6 | -0.672879 | 3.351835  | -2.746230 | 1            | -4.894557 | 3.948908  | -3.119658 |
| 6 | -1.507756 | 4.889704  | -0.576849 | 1            | -5.977007 | 3.648478  | -1.756851 |
| 1 | -0.873637 | 3.222624  | 0.633278  | 6            | -4.187052 | 2.420297  | 2.826672  |
| 6 | -1.234237 | 4.610975  | -2.957252 | 1            | -3.862193 | 3.111171  | 3.617268  |
| 1 | -0.339298 | 2.767736  | -3.595980 | 1            | -5.263139 | 2.262609  | 2.958998  |
| 6 | -1.651583 | 5.385445  | -1.872863 | 1            | -3.682256 | 1.466219  | 2.990844  |
| 1 | -1.835806 | 5.478672  | 0.274195  | 6            | -4.607039 | 4.357363  | 1.281643  |
| 1 | -1.343239 | 4.987369  | -3.970451 | 1            | -4.243001 | 4.927908  | 0.424496  |
| 1 | -2.089969 | 6.365414  | -2.038266 | 1            | -5.687344 | 4.223673  | 1.153983  |
| 1 | 1.292355  | -5.772539 | -3.257809 | 1            | -4.462164 | 4.978910  | 2.176647  |
| 6 | -3.185552 | -3.156189 | 0.426132  | 1            | -2.673288 | -1.225062 | -1.297235 |
| 6 | -4.008764 | -3.417005 | 1.532889  | 1            | -0.731691 | 1.499517  | 1.667501  |
| 6 | -3.685803 | -3.512610 | -0.840792 |              |           |           |           |
| 6 | -5.276926 | -3.984536 | 1.386365  |              |           |           |           |
| 1 | -3.666263 | -3.170044 | 2.531795  | <b>TS18a</b> |           |           |           |
| 6 | -4.951465 | -4.074269 | -0.999070 | 45           | 0.898902  | 0.599707  | -0.520540 |
| 1 | -3.062381 | -3.372678 | -1.721759 | 15           | -0.278455 | -1.435807 | -0.385648 |
| 6 | -5.756963 | -4.307467 | 0.118246  | 15           | -0.939600 | 1.824389  | 0.068026  |
| 1 | -5.890742 | -4.166868 | 2.264859  | 6            | 4.719805  | -1.314685 | 0.732264  |
|   |           |           |           | 6            | 5.074678  | -1.489546 | 2.080753  |

|    |           |           |           |   |           |           |           |
|----|-----------|-----------|-----------|---|-----------|-----------|-----------|
| 6  | 5.867368  | -2.565139 | 2.484836  | 6 | -1.398209 | 1.894820  | 1.845248  |
| 6  | 6.325566  | -3.487700 | 1.540760  | 6 | -2.610265 | 2.431821  | 2.302492  |
| 6  | 5.989892  | -3.326908 | 0.195102  | 6 | -0.505441 | 1.342472  | 2.773777  |
| 6  | 5.194597  | -2.250902 | -0.199810 | 6 | -2.911905 | 2.438946  | 3.662476  |
| 1  | 6.127281  | -2.685705 | 3.533560  | 1 | -3.335217 | 2.811158  | 1.588801  |
| 1  | 6.941417  | -4.327184 | 1.852858  | 6 | -0.812767 | 1.340039  | 4.134333  |
| 1  | 6.340233  | -4.043670 | -0.542966 | 1 | 0.412198  | 0.878759  | 2.423759  |
| 1  | 4.924301  | -2.150326 | -1.247859 | 6 | -2.014020 | 1.891886  | 4.580868  |
| 14 | 3.663872  | 0.147112  | 0.199786  | 1 | -3.862157 | 2.839369  | 4.001807  |
| 8  | 2.725186  | 0.434965  | 1.597511  | 1 | -0.119942 | 0.892456  | 4.841144  |
| 1  | 2.427947  | 1.358033  | 1.633440  | 1 | -2.259692 | 1.880772  | 5.638783  |
| 1  | 1.634437  | 2.004914  | -0.736220 | 6 | -0.872887 | 3.591608  | -0.467569 |
| 6  | -5.575734 | 0.207876  | 3.147778  | 6 | -1.380069 | 4.659377  | 0.282445  |
| 6  | -4.774756 | 0.117323  | 2.032439  | 6 | -0.254093 | 3.867023  | -1.699169 |
| 6  | -3.561316 | -0.624930 | 2.056116  | 6 | -1.284536 | 5.969602  | -0.193118 |
| 6  | -3.199534 | -1.281196 | 3.274245  | 1 | -1.832615 | 4.481056  | 1.249950  |
| 6  | -4.038265 | -1.157221 | 4.412260  | 6 | -0.177265 | 5.171702  | -2.181602 |
| 6  | -5.204094 | -0.429560 | 4.354622  | 1 | 0.186745  | 3.048113  | -2.258765 |
| 1  | -6.498111 | 0.780184  | 3.103324  | 6 | -0.692557 | 6.229422  | -1.428092 |
| 1  | -5.064159 | 0.622159  | 1.119025  | 1 | -1.673063 | 6.786734  | 0.408605  |
| 6  | -2.693753 | -0.713029 | 0.916770  | 1 | 0.301400  | 5.364044  | -3.137899 |
| 6  | -2.010554 | -2.047850 | 3.306547  | 1 | -0.620920 | 7.249000  | -1.796533 |
| 1  | -3.740794 | -1.655568 | 5.331436  | 6 | 0.789945  | -2.901755 | -0.074196 |
| 1  | -5.841134 | -0.344579 | 5.230396  | 6 | 0.780969  | -4.053637 | -0.872186 |
| 6  | -1.209622 | -2.151643 | 2.197090  | 6 | 1.732512  | -2.806073 | 0.964726  |
| 6  | -1.527085 | -1.476413 | 0.987859  | 6 | 1.672247  | -5.097926 | -0.615830 |
| 1  | -1.741880 | -2.564636 | 4.224521  | 1 | 0.086438  | -4.136759 | -1.699641 |
| 6  | -6.286654 | -1.599265 | -2.673999 | 6 | 2.606503  | -3.857548 | 1.230502  |
| 6  | -5.640463 | -0.456276 | -3.084233 | 1 | 1.798929  | -1.893848 | 1.550486  |
| 6  | -4.588184 | 0.102336  | -2.313546 | 6 | 2.578171  | -5.007482 | 0.440465  |
| 6  | -4.182867 | -0.539740 | -1.101504 | 1 | 1.656372  | -5.981744 | -1.248000 |
| 6  | -4.870166 | -1.722364 | -0.711039 | 1 | 3.339280  | -3.756555 | 2.023503  |
| 6  | -5.897024 | -2.233338 | -1.471543 | 1 | 3.276271  | -5.816640 | 0.634855  |
| 1  | -4.236395 | 1.784760  | -3.625865 | 6 | -1.268530 | -1.908062 | -1.854297 |
| 1  | -7.094157 | -2.016057 | -3.269200 | 6 | -2.142719 | -3.004589 | -1.829680 |
| 1  | -5.928215 | 0.042637  | -4.006230 | 6 | -1.174323 | -1.134934 | -3.017900 |
| 6  | -3.925062 | 1.288643  | -2.709922 | 6 | -2.903877 | -3.324597 | -2.951282 |
| 6  | -3.100190 | 0.007976  | -0.333714 | 1 | -2.243327 | -3.592555 | -0.921996 |
| 1  | -4.571512 | -2.227474 | 0.199115  | 6 | -1.943756 | -1.451415 | -4.137305 |
| 1  | -6.406739 | -3.137229 | -1.149973 | 1 | -0.518136 | -0.271263 | -3.019702 |
| 6  | -2.476816 | 1.184091  | -0.752703 | 6 | -2.809100 | -2.545223 | -4.106179 |
| 6  | -2.911361 | 1.815315  | -1.950214 | 1 | -3.591089 | -4.164452 | -2.915621 |
| 1  | -0.316218 | -2.760664 | 2.245774  | 1 | -1.876863 | -0.833328 | -5.028174 |
| 1  | -2.427759 | 2.729710  | -2.271309 | 1 | -3.417850 | -2.784497 | -4.973276 |

|             |          |           |           |    |           |           |           |
|-------------|----------|-----------|-----------|----|-----------|-----------|-----------|
| 1           | 4.710752 | -0.781515 | 2.820090  | 1  | 1.330071  | -0.051637 | 4.026737  |
| 6           | 4.799013 | 1.633790  | -0.038517 | 1  | 2.977148  | -4.026179 | 3.888117  |
| 6           | 4.312110 | 2.938976  | -0.242154 | 6  | -2.546386 | 0.428902  | 5.046602  |
| 6           | 6.193932 | 1.456572  | -0.012288 | 6  | -2.484668 | 0.518733  | 3.674606  |
| 6           | 5.179519 | 4.018167  | -0.410445 | 6  | -1.879643 | -0.506581 | 2.894425  |
| 1           | 3.239765 | 3.108718  | -0.288015 | 6  | -1.368816 | -1.654589 | 3.577913  |
| 6           | 7.066684 | 2.532257  | -0.186289 | 6  | -1.454209 | -1.722955 | 4.992686  |
| 1           | 6.605419 | 0.464176  | 0.148698  | 6  | -2.022696 | -0.701808 | 5.717529  |
| 6           | 6.561099 | 3.817196  | -0.384703 | 1  | -3.006722 | 1.229432  | 5.618576  |
| 1           | 4.776213 | 5.015706  | -0.565645 | 1  | -2.909599 | 1.380758  | 3.174212  |
| 1           | 8.140773 | 2.366414  | -0.164157 | 6  | -1.789744 | -0.434745 | 1.461717  |
| 1           | 7.238359 | 4.656775  | -0.518480 | 6  | -0.749957 | -2.683011 | 2.826811  |
| 6           | 2.732214 | -0.268862 | -1.385548 | 1  | -1.046044 | -2.597590 | 5.492185  |
| 1           | 2.592992 | -1.350789 | -1.477603 | 1  | -2.075114 | -0.760645 | 6.800788  |
| 1           | 1.337764 | 0.306094  | -1.993806 | 6  | -0.610953 | -2.568003 | 1.469642  |
| 6           | 3.476971 | 0.253468  | -2.631944 | 6  | -1.168815 | -1.466200 | 0.762521  |
| 1           | 4.509126 | -0.130766 | -2.630227 | 1  | -0.323462 | -3.533617 | 3.347608  |
| 1           | 3.563873 | 1.343688  | -2.577060 | 6  | -6.765990 | 0.469412  | 0.688169  |
| 6           | 2.817274 | -0.143394 | -3.955357 | 6  | -6.123021 | 1.549370  | 0.131041  |
| 1           | 3.415662 | 0.180545  | -4.815473 | 6  | -4.708251 | 1.648995  | 0.163331  |
| 1           | 2.688619 | -1.231194 | -4.020824 | 6  | -3.934941 | 0.625441  | 0.792285  |
| 1           | 1.822397 | 0.311211  | -4.045269 | 6  | -4.636290 | -0.473431 | 1.365061  |
|             |          |           |           | 6  | -6.009276 | -0.551655 | 1.308930  |
|             |          |           |           | 1  | -4.608495 | 3.526162  | -0.903857 |
|             |          |           |           | 1  | -7.849086 | 0.395786  | 0.651941  |
|             |          |           |           | 1  | -6.686374 | 2.340944  | -0.356125 |
|             |          |           |           | 6  | -4.030170 | 2.729473  | -0.443172 |
|             |          |           |           | 6  | -2.495894 | 0.687851  | 0.763541  |
|             |          |           |           | 1  | -4.078157 | -1.272849 | 1.834554  |
|             |          |           |           | 1  | -6.516282 | -1.408213 | 1.743933  |
|             |          |           |           | 6  | -1.860106 | 1.730036  | 0.083089  |
|             |          |           |           | 6  | -2.661785 | 2.760841  | -0.488501 |
|             |          |           |           | 1  | -0.047882 | -3.318309 | 0.931141  |
|             |          |           |           | 1  | -2.182735 | 3.585991  | -0.993664 |
|             |          |           |           | 15 | -0.807084 | -1.303299 | -1.026759 |
|             |          |           |           | 15 | -0.030862 | 1.785813  | -0.313422 |
|             |          |           |           | 6  | -2.374268 | -0.743459 | -1.833740 |
|             |          |           |           | 6  | -3.579216 | -1.413298 | -1.580086 |
|             |          |           |           | 6  | -2.346975 | 0.271388  | -2.793006 |
|             |          |           |           | 6  | -4.743451 | -1.046790 | -2.248306 |
|             |          |           |           | 1  | -3.609377 | -2.213536 | -0.847712 |
|             |          |           |           | 6  | -3.512376 | 0.634274  | -3.470417 |
|             |          |           |           | 1  | -1.411707 | 0.781847  | -2.994592 |
|             |          |           |           | 6  | -4.712910 | -0.019409 | -3.194952 |
| <b>TS1a</b> |          |           |           |    |           |           |           |
| 45          | 0.998058 | 0.016424  | -1.334253 |    |           |           |           |
| 17          | 2.696708 | 1.566982  | -2.029387 |    |           |           |           |
| 6           | 2.608689 | -3.063618 | -2.312752 |    |           |           |           |
| 6           | 2.426416 | -1.534166 | -2.342177 |    |           |           |           |
| 6           | 3.657041 | -3.211617 | -1.187581 |    |           |           |           |
| 1           | 1.679297 | -3.552736 | -2.017034 |    |           |           |           |
| 1           | 2.899965 | -3.479438 | -3.287267 |    |           |           |           |
| 1           | 1.555031 | -1.171685 | -2.927860 |    |           |           |           |
| 1           | 3.281487 | -1.032619 | -2.807187 |    |           |           |           |
| 1           | 3.581570 | -4.138715 | -0.612596 |    |           |           |           |
| 1           | 4.679593 | -3.142868 | -1.576276 |    |           |           |           |
| 14          | 3.135750 | -1.532012 | -0.424641 |    |           |           |           |
| 6           | 2.491063 | -1.803343 | 1.332429  |    |           |           |           |
| 6           | 1.921631 | -0.770704 | 2.093272  |    |           |           |           |
| 6           | 2.856372 | -2.980933 | 2.007389  |    |           |           |           |
| 6           | 1.765977 | -0.876365 | 3.472512  |    |           |           |           |
| 1           | 1.607957 | 0.131520  | 1.594627  |    |           |           |           |
| 6           | 2.681567 | -3.106829 | 3.388436  |    |           |           |           |
| 1           | 3.308655 | -3.801729 | 1.460016  |    |           |           |           |
| 6           | 2.151907 | -2.047934 | 4.126596  |    |           |           |           |





|    |           |           |           |            |           |           |           |
|----|-----------|-----------|-----------|------------|-----------|-----------|-----------|
| 6  | -2.495943 | -3.322478 | -0.337161 |            |           |           |           |
| 6  | -3.530051 | -2.317534 | 1.613324  | <b>TS1</b> |           |           |           |
| 6  | -3.698635 | -3.950106 | -0.648431 | 6          | 3.486090  | -4.134029 | 2.547092  |
| 1  | -1.625444 | -3.452493 | -0.972159 | 6          | 3.238336  | -3.189507 | 1.577334  |
| 6  | -4.730791 | -2.945278 | 1.293335  | 6          | 2.947854  | -1.840916 | 1.923860  |
| 1  | -3.456188 | -1.668478 | 2.478678  | 6          | 2.929197  | -1.489798 | 3.309924  |
| 6  | -4.820501 | -3.760427 | 0.162144  | 6          | 3.174515  | -2.488942 | 4.287216  |
| 1  | -3.762522 | -4.584265 | -1.527980 | 6          | 3.447950  | -3.785408 | 3.917660  |
| 1  | -5.601159 | -2.793777 | 1.925693  | 1          | 3.706873  | -5.157687 | 2.258324  |
| 1  | -5.760424 | -4.244388 | -0.087116 | 1          | 3.257876  | -3.472087 | 0.531809  |
| 6  | -0.328775 | -1.206076 | 1.830739  | 6          | 2.645744  | -0.844668 | 0.938170  |
| 1  | 0.091735  | -0.894727 | 2.767295  | 6          | 2.668335  | -0.145662 | 3.668821  |
| 6  | 1.896217  | -3.585169 | 1.249670  | 1          | 3.145876  | -2.206018 | 5.336220  |
| 6  | 1.631215  | -2.812907 | -0.065278 | 1          | 3.637633  | -4.541935 | 4.673569  |
| 6  | 2.877922  | -2.657921 | 2.027559  | 6          | 2.429457  | 0.806403  | 2.710149  |
| 1  | 0.960680  | -3.702752 | 1.802350  | 6          | 2.401228  | 0.471009  | 1.328414  |
| 1  | 2.298965  | -4.586798 | 1.061143  | 1          | 2.668290  | 0.127752  | 4.720790  |
| 1  | 0.618636  | -2.962945 | -0.471180 | 6          | 6.288513  | -1.913515 | -2.550874 |
| 1  | 2.292234  | -3.093250 | -0.889559 | 6          | 5.095705  | -2.023388 | -3.227035 |
| 1  | 2.549294  | -2.441627 | 3.048735  | 6          | 3.859547  | -1.830790 | -2.557675 |
| 1  | 3.896603  | -3.054092 | 2.085021  | 6          | 3.855210  | -1.500926 | -1.166464 |
| 14 | 2.693203  | -1.289793 | 0.719100  | 6          | 5.106606  | -1.398538 | -0.498035 |
| 6  | 2.432332  | 0.437746  | 1.447670  | 6          | 6.289623  | -1.603701 | -1.170564 |
| 6  | 2.463750  | 1.576851  | 0.623383  | 1          | 2.619337  | -2.224907 | -4.284463 |
| 6  | 2.281302  | 0.631514  | 2.831596  | 1          | 7.229373  | -2.065697 | -3.071759 |
| 6  | 2.313686  | 2.856740  | 1.154226  | 1          | 5.079418  | -2.263651 | -4.286867 |
| 1  | 2.595587  | 1.455604  | -0.447053 | 6          | 2.621015  | -1.959374 | -3.230483 |
| 6  | 2.145613  | 1.912082  | 3.371868  | 6          | 2.608992  | -1.254723 | -0.500403 |
| 1  | 2.281694  | -0.225994 | 3.499886  | 1          | 5.121993  | -1.149137 | 0.555829  |
| 6  | 2.150558  | 3.027800  | 2.531187  | 1          | 7.233052  | -1.520959 | -0.638536 |
| 1  | 2.309386  | 3.716273  | 0.491538  | 6          | 1.408070  | -1.395018 | -1.194829 |
| 1  | 2.038236  | 2.038930  | 4.446334  | 6          | 1.436001  | -1.763286 | -2.568152 |
| 1  | 2.033031  | 4.024989  | 2.946588  | 17         | -0.837222 | 3.706533  | -0.678984 |
| 6  | 4.226556  | -1.099441 | -0.358484 | 1          | 2.250488  | 1.830578  | 3.011742  |
| 6  | 4.323377  | -1.487250 | -1.703511 | 1          | 0.504760  | -1.887935 | -3.104852 |
| 6  | 5.364199  | -0.533262 | 0.246978  | 15         | 1.802418  | 1.751895  | 0.130327  |
| 6  | 5.512344  | -1.321030 | -2.416483 | 15         | -0.218997 | -0.896270 | -0.459327 |
| 1  | 3.454289  | -1.889979 | -2.211907 | 6          | 2.954975  | 1.720038  | -1.281070 |
| 6  | 6.557321  | -0.375072 | -0.456666 | 6          | 4.343365  | 1.620587  | -1.114489 |
| 1  | 5.315823  | -0.203882 | 1.283074  | 6          | 2.415679  | 1.797126  | -2.571916 |
| 6  | 6.632679  | -0.769489 | -1.794366 | 6          | 5.182155  | 1.599553  | -2.226039 |
| 1  | 5.560228  | -1.618599 | -3.460668 | 1          | 4.763752  | 1.528301  | -0.118026 |
| 1  | 7.423895  | 0.060414  | 0.034039  | 6          | 3.258700  | 1.767741  | -3.682583 |
| 1  | 7.558634  | -0.642286 | -2.349087 | 1          | 1.338709  | 1.874902  | -2.690545 |

|    |           |           |           |             |           |           |           |
|----|-----------|-----------|-----------|-------------|-----------|-----------|-----------|
| 6  | 4.640111  | 1.667542  | -3.511003 | 6           | -6.046720 | 1.383379  | 1.464330  |
| 1  | 6.254389  | 1.500884  | -2.089991 | 1           | -5.674618 | 0.905260  | 2.384224  |
| 1  | 2.834605  | 1.819752  | -4.681125 | 6           | -7.689522 | -0.047605 | -1.717432 |
| 1  | 5.295176  | 1.636474  | -4.376880 | 1           | -8.224426 | 0.276268  | -2.620884 |
| 6  | 2.111618  | 3.329948  | 1.007678  | 1           | -7.542140 | -1.131178 | -1.802864 |
| 6  | 1.139254  | 3.774043  | 1.918064  | 1           | -8.348052 | 0.131725  | -0.861825 |
| 6  | 3.268235  | 4.093677  | 0.816767  | 6           | -5.481646 | 0.400693  | -2.840425 |
| 6  | 1.340911  | 4.941030  | 2.650555  | 1           | -6.025081 | 0.666849  | -3.758049 |
| 1  | 0.214606  | 3.218229  | 2.032428  | 1           | -4.543492 | 0.962709  | -2.818556 |
| 6  | 3.460432  | 5.271458  | 1.541168  | 1           | -5.223035 | -0.662857 | -2.907326 |
| 1  | 4.013565  | 3.784757  | 0.093475  | 6           | -6.749293 | -2.055325 | 1.042699  |
| 6  | 2.503078  | 5.692744  | 2.463373  | 1           | -6.708022 | -3.137773 | 1.228783  |
| 1  | 0.578398  | 5.275778  | 3.347530  | 1           | -6.981088 | -1.575600 | 2.001352  |
| 1  | 4.358859  | 5.860186  | 1.378776  | 1           | -7.589183 | -1.868140 | 0.367436  |
| 1  | 2.653753  | 6.610703  | 3.024436  | 6           | -4.278310 | -1.875878 | 1.476670  |
| 6  | -0.301541 | -1.703468 | 1.176066  | 1           | -4.243412 | -2.952940 | 1.694510  |
| 6  | 0.087714  | -3.035769 | 1.373955  | 1           | -3.302614 | -1.573391 | 1.093797  |
| 6  | -0.791887 | -0.960475 | 2.257702  | 1           | -4.428833 | -1.357970 | 2.433248  |
| 6  | -0.014582 | -3.616886 | 2.635187  | 6           | -7.582943 | 1.433352  | 1.543861  |
| 1  | 0.491526  | -3.609102 | 0.545261  | 1           | -8.036810 | 0.439434  | 1.614211  |
| 6  | -0.883221 | -1.541713 | 3.522092  | 1           | -7.908175 | 2.009094  | 2.421238  |
| 1  | -1.108251 | 0.065443  | 2.095427  | 1           | -8.004777 | 1.929163  | 0.661155  |
| 6  | -0.495157 | -2.868478 | 3.711775  | 6           | -5.473957 | 2.810832  | 1.409786  |
| 1  | 0.306215  | -4.643029 | 2.783429  | 1           | -5.794368 | 3.329483  | 0.496899  |
| 1  | -1.259543 | -0.957360 | 4.356581  | 1           | -5.827799 | 3.406430  | 2.262915  |
| 1  | -0.562492 | -3.319704 | 4.697456  | 1           | -4.380311 | 2.812203  | 1.412958  |
| 6  | -1.460716 | -1.792344 | -1.484385 | 1           | -1.499851 | 1.274577  | -1.656181 |
| 6  | -1.812164 | -1.262511 | -2.736578 | 14          | -5.387541 | 0.310659  | 0.024215  |
| 6  | -2.097676 | -2.957849 | -1.044710 |             |           |           |           |
| 6  | -2.755243 | -1.897649 | -3.539298 |             |           |           |           |
| 1  | -1.357173 | -0.337568 | -3.077110 | <b>TS2a</b> |           |           |           |
| 6  | -3.058980 | -3.583378 | -1.841615 | 45          | 1.014530  | 0.651427  | -1.076292 |
| 1  | -1.871300 | -3.369532 | -0.069666 | 17          | 3.016588  | -0.468232 | -1.912090 |
| 6  | -3.385598 | -3.061191 | -3.091827 | 6           | 2.650212  | 3.148092  | -0.195870 |
| 1  | -3.016522 | -1.469387 | -4.502234 | 6           | 2.100442  | 2.443153  | -1.439683 |
| 1  | -3.554890 | -4.478021 | -1.476162 | 6           | 3.154110  | 2.140372  | 0.864324  |
| 1  | -4.135209 | -3.547419 | -3.709427 | 1           | 1.878573  | 3.783295  | 0.253431  |
| 45 | -0.521240 | 1.359869  | -0.435122 | 1           | 3.471147  | 3.828554  | -0.472439 |
| 6  | -3.641463 | 0.761354  | -0.256934 | 1           | 1.499150  | 3.129670  | -2.040376 |
| 6  | -2.447115 | 1.036865  | -0.368641 | 1           | 2.942634  | 2.144668  | -2.080210 |
| 6  | -5.408012 | -1.548021 | 0.485468  | 1           | 2.393660  | 2.028559  | 1.640129  |
| 1  | -5.195714 | -2.085674 | -0.451308 | 1           | 4.071021  | 2.485036  | 1.362161  |
| 6  | -6.339859 | 0.680969  | -1.595424 | 14          | 3.479645  | 0.407007  | 0.151528  |
| 1  | -6.540163 | 1.763284  | -1.563700 | 6           | 3.133780  | -1.004723 | 1.341569  |
|    |           |           |           | 6           | 3.102138  | -2.347968 | 0.927296  |

|   |           |           |           |    |           |           |           |
|---|-----------|-----------|-----------|----|-----------|-----------|-----------|
| 6 | 3.001322  | -0.738547 | 2.716160  | 6  | -4.366908 | 1.525146  | -2.014427 |
| 6 | 2.938050  | -3.384318 | 1.847275  | 6  | -2.938645 | 0.107447  | -0.046171 |
| 1 | 3.191391  | -2.587958 | -0.125979 | 1  | -4.207641 | -2.174360 | 0.719511  |
| 6 | 2.828224  | -1.770477 | 3.639736  | 1  | -6.313264 | -3.059530 | -0.183953 |
| 1 | 3.039007  | 0.286461  | 3.075234  | 6  | -2.407953 | 1.285280  | -0.577330 |
| 6 | 2.795407  | -3.097851 | 3.207098  | 6  | -3.166656 | 1.997491  | -1.545291 |
| 1 | 2.902020  | -4.410963 | 1.495241  | 1  | 0.580096  | -2.433192 | 1.699603  |
| 1 | 2.726000  | -1.538959 | 4.696885  | 1  | -2.798121 | 2.939190  | -1.925713 |
| 1 | 2.662151  | -3.903133 | 3.924508  | 15 | -0.243721 | -1.359518 | -0.855277 |
| 6 | 5.341762  | 0.396457  | -0.193571 | 15 | -0.671132 | 1.855764  | -0.151689 |
| 6 | 5.977691  | 1.562670  | -0.653291 | 6  | -1.566720 | -1.524698 | -2.130684 |
| 6 | 6.129111  | -0.752983 | -0.015952 | 6  | -2.467162 | -2.598300 | -2.137626 |
| 6 | 7.344326  | 1.580290  | -0.933006 | 6  | -1.620347 | -0.581157 | -3.163271 |
| 1 | 5.398777  | 2.471150  | -0.800170 | 6  | -3.426776 | -2.706070 | -3.140441 |
| 6 | 7.497831  | -0.740220 | -0.286513 | 1  | -2.422638 | -3.345333 | -1.351513 |
| 1 | 5.669525  | -1.668902 | 0.345385  | 6  | -2.578810 | -0.691700 | -4.171221 |
| 6 | 8.108694  | 0.426798  | -0.748655 | 1  | -0.911208 | 0.243205  | -3.157896 |
| 1 | 7.812876  | 2.493135  | -1.291879 | 6  | -3.487504 | -1.750007 | -4.157139 |
| 1 | 8.088227  | -1.640465 | -0.135562 | 1  | -4.136062 | -3.528106 | -3.122421 |
| 1 | 9.174418  | 0.438095  | -0.961553 | 1  | -2.618765 | 0.052794  | -4.961528 |
| 6 | -4.461990 | 0.157961  | 3.963190  | 1  | -4.240550 | -1.832590 | -4.935731 |
| 6 | -3.968828 | 0.121862  | 2.677930  | 6  | 0.436802  | -3.072655 | -1.017961 |
| 6 | -2.776449 | -0.587146 | 2.368569  | 6  | 1.314164  | -3.308179 | -2.087949 |
| 6 | -2.087633 | -1.243313 | 3.436682  | 6  | 0.055474  | -4.157863 | -0.216524 |
| 6 | -2.615265 | -1.181507 | 4.751012  | 6  | 1.839702  | -4.579136 | -2.314507 |
| 6 | -3.781893 | -0.499750 | 5.013163  | 1  | 1.589897  | -2.492080 | -2.743996 |
| 1 | -5.377601 | 0.703616  | 4.173191  | 6  | 0.581905  | -5.430519 | -0.442844 |
| 1 | -4.493110 | 0.641310  | 1.885327  | 1  | -0.651232 | -4.017602 | 0.592620  |
| 6 | -2.240021 | -0.649269 | 1.037025  | 6  | 1.486212  | -5.643903 | -1.483439 |
| 6 | -0.866492 | -1.904670 | 3.154495  | 1  | 2.526900  | -4.735361 | -3.141253 |
| 1 | -2.074427 | -1.682271 | 5.550196  | 1  | 0.278328  | -6.256279 | 0.195176  |
| 1 | -4.178599 | -0.460737 | 6.023716  | 1  | 1.900482  | -6.633476 | -1.654827 |
| 6 | -0.372968 | -1.955689 | 1.877499  | 6  | -0.782374 | 1.928405  | 1.680595  |
| 6 | -1.079818 | -1.373188 | 0.786800  | 6  | -1.824685 | 2.611598  | 2.325827  |
| 1 | -0.305830 | -2.356328 | 3.968345  | 6  | 0.156426  | 1.237484  | 2.450220  |
| 6 | -6.611726 | -1.421099 | -1.573341 | 6  | -1.896915 | 2.631823  | 3.716532  |
| 6 | -6.112114 | -0.232460 | -2.052101 | 1  | -2.590110 | 3.109412  | 1.738134  |
| 6 | -4.901399 | 0.304259  | -1.542848 | 6  | 0.082267  | 1.254316  | 3.841979  |
| 6 | -4.190659 | -0.401252 | -0.523590 | 1  | 0.906856  | 0.644335  | 1.946155  |
| 6 | -4.739179 | -1.624025 | -0.047353 | 6  | -0.939190 | 1.957746  | 4.478617  |
| 6 | -5.916613 | -2.119976 | -0.558122 | 1  | -2.714127 | 3.152752  | 4.206417  |
| 1 | -4.917995 | 2.087850  | -2.763815 | 1  | 0.806049  | 0.689408  | 4.422010  |
| 1 | -7.537762 | -1.826045 | -1.971430 | 1  | -1.007797 | 1.961177  | 5.562409  |
| 1 | -6.634779 | 0.314878  | -2.832351 | 6  | -0.722834 | 3.631576  | -0.662433 |

|             |           |           |           |    |           |           |           |
|-------------|-----------|-----------|-----------|----|-----------|-----------|-----------|
| 6           | -0.709869 | 3.919302  | -2.038857 | 1  | -1.640942 | -0.267292 | 4.999135  |
| 6           | -0.682602 | 4.701277  | 0.239330  | 1  | 2.534025  | -0.518540 | 3.981780  |
| 6           | -0.712351 | 5.233858  | -2.497978 | 1  | 0.674676  | -0.965654 | 5.582917  |
| 1           | -0.681829 | 3.101650  | -2.753732 | 17 | -1.252318 | 0.976650  | -2.796007 |
| 6           | -0.666895 | 6.020834  | -0.220013 | 6  | -1.535415 | -1.711555 | -0.077902 |
| 1           | -0.652149 | 4.512769  | 1.305391  | 6  | -2.919257 | -2.080761 | -0.194347 |
| 6           | -0.692324 | 6.292334  | -1.586450 | 6  | -3.484442 | -2.984788 | 0.727134  |
| 1           | -0.709913 | 5.430924  | -3.566257 | 6  | -3.723220 | -1.543478 | -1.216870 |
| 1           | -0.631997 | 6.835580  | 0.497863  | 6  | -4.829960 | -3.323443 | 0.638373  |
| 1           | -0.682684 | 7.318880  | -1.941522 | 1  | -2.857082 | -3.406963 | 1.506545  |
|             |           |           |           | 6  | -5.068168 | -1.894111 | -1.302180 |
|             |           |           |           | 1  | -3.277517 | -0.858156 | -1.931261 |
| <b>TS2b</b> |           |           |           | 6  | -5.624967 | -2.778827 | -0.375846 |
| 45          | -0.361653 | -0.456514 | -1.108208 | 1  | -5.261144 | -4.015876 | 1.355638  |
| 15          | -0.394608 | 1.430862  | 0.499687  | 1  | -5.681827 | -1.476720 | -2.095030 |
| 6           | -2.022580 | 2.252568  | 0.704400  | 1  | -6.674765 | -3.049198 | -0.445069 |
| 6           | -3.168704 | 1.654311  | 0.172069  | 6  | -0.397306 | -1.851402 | 0.531362  |
| 6           | -2.144320 | 3.443857  | 1.435341  | 1  | -0.050139 | -1.945876 | 1.549513  |
| 6           | -4.424623 | 2.226521  | 0.378983  | 6  | -0.143264 | -3.391891 | -2.238513 |
| 1           | -3.073765 | 0.751833  | -0.413645 | 6  | -0.513047 | -1.958942 | -2.621305 |
| 6           | -3.397960 | 4.017758  | 1.636010  | 6  | 1.249733  | -3.462506 | -1.585006 |
| 1           | -1.258630 | 3.922077  | 1.842291  | 1  | -0.884629 | -3.789834 | -1.537363 |
| 6           | -4.541190 | 3.407922  | 1.110758  | 1  | -0.187273 | -4.040896 | -3.126296 |
| 1           | -5.305615 | 1.748673  | -0.039996 | 1  | -1.538864 | -1.899569 | -2.991955 |
| 1           | -3.484021 | 4.942062  | 2.200564  | 1  | 0.139417  | -1.568754 | -3.407942 |
| 1           | -5.517433 | 3.858039  | 1.268350  | 1  | 1.355662  | -4.329964 | -0.924399 |
| 6           | 0.719929  | 2.866262  | 0.241709  | 1  | 2.037600  | -3.559313 | -2.343775 |
| 6           | 1.491163  | 3.445096  | 1.258157  | 14 | 1.548518  | -1.852203 | -0.640894 |
| 6           | 0.758941  | 3.412934  | -1.051187 | 6  | 2.595069  | -2.178923 | 0.904300  |
| 6           | 2.298581  | 4.551187  | 0.983539  | 6  | 3.809588  | -1.513410 | 1.144861  |
| 1           | 1.462916  | 3.036793  | 2.262665  | 6  | 2.218888  | -3.183440 | 1.816101  |
| 6           | 1.552502  | 4.527578  | -1.314038 | 6  | 4.592434  | -1.808014 | 2.263397  |
| 1           | 0.175749  | 2.954209  | -1.844256 | 1  | 4.155900  | -0.758151 | 0.447730  |
| 6           | 2.328225  | 5.096543  | -0.300790 | 6  | 2.996055  | -3.487131 | 2.932351  |
| 1           | 2.896354  | 4.990423  | 1.777538  | 1  | 1.302837  | -3.744513 | 1.649669  |
| 1           | 1.575271  | 4.942608  | -2.317637 | 6  | 4.184612  | -2.791707 | 3.164990  |
| 1           | 2.952529  | 5.960638  | -0.510896 | 1  | 5.524417  | -1.272802 | 2.425164  |
| 6           | -0.039090 | 0.830806  | 2.197361  | 1  | 2.676760  | -4.266424 | 3.619152  |
| 6           | -1.080768 | 0.568773  | 3.098860  | 1  | 4.793045  | -3.023769 | 4.034943  |
| 6           | 1.263095  | 0.434185  | 2.540184  | 6  | 2.470939  | -0.572761 | -1.697970 |
| 6           | -0.822122 | -0.071684 | 4.312166  | 6  | 2.755098  | -0.819439 | -3.055839 |
| 1           | -2.095618 | 0.858938  | 2.849605  | 6  | 2.854074  | 0.678255  | -1.177299 |
| 6           | 1.521795  | -0.203057 | 3.751776  | 6  | 3.396065  | 0.130900  | -3.846989 |
| 1           | 2.084069  | 0.604904  | 1.854162  | 1  | 2.466734  | -1.763531 | -3.506277 |
| 6           | 0.477088  | -0.460646 | 4.641664  |    |           |           |           |

|            |           |           |           |    |           |           |           |
|------------|-----------|-----------|-----------|----|-----------|-----------|-----------|
| 6          | 3.497511  | 1.634497  | -1.962084 | 6  | 4.464921  | 1.769276  | -0.494758 |
| 1          | 2.642302  | 0.921759  | -0.143204 | 6  | 2.707360  | 2.168938  | -2.112428 |
| 6          | 3.767965  | 1.362847  | -3.302427 | 6  | 5.421965  | 1.922620  | -1.494666 |
| 1          | 3.601480  | -0.086704 | -4.891578 | 1  | 4.773538  | 1.521482  | 0.516660  |
| 1          | 3.765542  | 2.592074  | -1.527549 | 6  | 3.668416  | 2.315827  | -3.112330 |
| 1          | 4.261984  | 2.106154  | -3.922056 | 1  | 1.653430  | 2.267587  | -2.345765 |
| <b>TS2</b> |           |           |           | 6  | 5.023897  | 2.190199  | -2.806204 |
| 6          | 3.377963  | -4.539076 | 1.901121  | 1  | 6.474778  | 1.806705  | -1.256667 |
| 6          | 3.161598  | -3.439083 | 1.103506  | 1  | 3.355261  | 2.521738  | -4.131671 |
| 6          | 2.856378  | -2.170688 | 1.670049  | 1  | 5.770624  | 2.294231  | -3.588041 |
| 6          | 2.785087  | -2.066429 | 3.095467  | 6  | 1.966396  | 3.112973  | 1.595250  |
| 6          | 2.992887  | -3.224111 | 3.889975  | 6  | 0.870845  | 3.385242  | 2.432608  |
| 6          | 3.285181  | -4.436214 | 3.309163  | 6  | 3.070686  | 3.972967  | 1.617670  |
| 1          | 3.613823  | -5.496897 | 1.446131  | 6  | 0.889602  | 4.482150  | 3.291650  |
| 1          | 3.220829  | -3.532777 | 0.025831  | 1  | -0.003374 | 2.736486  | 2.404828  |
| 6          | 2.600025  | -1.013037 | 0.866741  | 6  | 3.085511  | 5.073885  | 2.475033  |
| 6          | 2.517708  | -0.803104 | 3.677306  | 1  | 3.910799  | 3.795515  | 0.955906  |
| 1          | 2.923376  | -3.130311 | 4.970591  | 6  | 2.000192  | 5.328345  | 3.314631  |
| 1          | 3.448277  | -5.314252 | 3.927326  | 1  | 0.033782  | 4.682324  | 3.929506  |
| 6          | 2.330508  | 0.308800  | 2.893579  | 1  | 3.945546  | 5.737555  | 2.481124  |
| 6          | 2.360179  | 0.218042  | 1.476502  | 1  | 2.014260  | 6.189268  | 3.976803  |
| 1          | 2.475028  | -0.722076 | 4.760431  | 6  | -0.380764 | -1.944092 | 0.781540  |
| 6          | 6.304618  | -1.525424 | -2.693324 | 6  | 0.036295  | -3.275165 | 0.644458  |
| 6          | 5.129352  | -1.435408 | -3.402061 | 6  | -0.918897 | -1.512940 | 2.001559  |
| 6          | 3.882699  | -1.324044 | -2.733376 | 6  | -0.092354 | -4.164495 | 1.708789  |
| 6          | 3.850852  | -1.290347 | -1.303542 | 1  | 0.493348  | -3.607340 | -0.282434 |
| 6          | 5.085930  | -1.379157 | -0.603300 | 6  | -1.034887 | -2.402493 | 3.068312  |
| 6          | 6.278234  | -1.500675 | -1.279215 | 1  | -1.251597 | -0.484816 | 2.099974  |
| 1          | 2.684622  | -1.264815 | -4.532384 | 6  | -0.622458 | -3.727933 | 2.923776  |
| 1          | 7.253117  | -1.614224 | -3.215035 | 1  | 0.249295  | -5.188734 | 1.598727  |
| 1          | 5.134780  | -1.450942 | -4.488770 | 1  | -1.447689 | -2.058314 | 4.012099  |
| 6          | 2.662548  | -1.239930 | -3.446035 | 1  | -0.707427 | -4.419047 | 3.757300  |
| 6          | 2.595823  | -1.140916 | -0.625929 | 6  | -1.437203 | -1.269433 | -1.864252 |
| 1          | 5.080594  | -1.346164 | 0.479173  | 6  | -1.897053 | -0.313333 | -2.781763 |
| 1          | 7.208409  | -1.569831 | -0.722497 | 6  | -1.900969 | -2.586599 | -1.958755 |
| 6          | 1.411852  | -1.081519 | -1.363755 | 6  | -2.785676 | -0.676767 | -3.791038 |
| 6          | 1.465717  | -1.134114 | -2.783502 | 1  | -1.581817 | 0.719230  | -2.681304 |
| 17         | -0.621414 | 3.825980  | -1.437214 | 6  | -2.808809 | -2.942798 | -2.957066 |
| 1          | 2.143444  | 1.269297  | 3.359527  | 1  | -1.585733 | -3.331268 | -1.238437 |
| 1          | 0.544855  | -1.080417 | -3.350874 | 6  | -3.247843 | -1.992062 | -3.878545 |
| 15         | 1.810851  | 1.671309  | 0.472622  | 1  | -3.136149 | 0.074748  | -4.491698 |
| 15         | -0.231992 | -0.739414 | -0.582906 | 1  | -3.177205 | -3.963424 | -3.006691 |
| 6          | 3.101100  | 1.891743  | -0.797367 | 1  | -3.955921 | -2.270401 | -4.653906 |
|            |           |           |           | 45 | -0.462139 | 1.358848  | 0.053096  |

|             |           |           |           |    |           |           |           |
|-------------|-----------|-----------|-----------|----|-----------|-----------|-----------|
| 6           | -3.605535 | 0.745130  | 0.177929  | 1  | -1.420168 | -1.721154 | -3.187066 |
| 6           | -2.411651 | 1.044619  | 0.091468  | 1  | -4.553871 | 0.209881  | -2.597485 |
| 6           | -5.354469 | -1.645305 | -0.250643 | 1  | -3.789136 | 1.713883  | -2.144311 |
| 1           | -5.063187 | -1.712944 | -1.309903 | 14 | -4.188951 | 0.308722  | -0.216125 |
| 6           | -6.255040 | 1.281551  | -1.160527 | 6  | -4.298401 | -1.500070 | 0.238870  |
| 1           | -6.468792 | 2.237813  | -0.657099 | 6  | -3.985469 | -1.961234 | 1.526570  |
| 6           | -6.096852 | 0.537813  | 1.897526  | 6  | -4.749730 | -2.435409 | -0.709968 |
| 1           | -5.752132 | -0.302075 | 2.521085  | 6  | -4.100264 | -3.312122 | 1.853891  |
| 6           | -7.591725 | 0.695693  | -1.647851 | 1  | -3.634180 | -1.257281 | 2.275039  |
| 1           | -8.098707 | 1.397459  | -2.324568 | 6  | -4.872998 | -3.786125 | -0.385429 |
| 1           | -7.428925 | -0.231145 | -2.211373 | 1  | -4.990842 | -2.112142 | -1.719444 |
| 1           | -8.281913 | 0.469556  | -0.829064 | 6  | -4.542588 | -4.226982 | 0.897730  |
| 6           | -5.348672 | 1.582486  | -2.366523 | 1  | -3.833299 | -3.651977 | 2.850371  |
| 1           | -5.861619 | 2.234788  | -3.087346 | 1  | -5.215619 | -4.494474 | -1.134556 |
| 1           | -4.416371 | 2.065976  | -2.061926 | 1  | -4.627132 | -5.280435 | 1.149743  |
| 1           | -5.081403 | 0.657599  | -2.892312 | 6  | -5.843271 | 1.147603  | 0.052577  |
| 6           | -6.713961 | -2.343658 | -0.075363 | 6  | -5.949875 | 2.549627  | 0.011339  |
| 1           | -6.652945 | -3.395801 | -0.387709 | 6  | -7.013458 | 0.397115  | 0.251082  |
| 1           | -7.022105 | -2.341517 | 0.977389  | 6  | -7.184252 | 3.179589  | 0.158257  |
| 1           | -7.513135 | -1.872940 | -0.654888 | 1  | -5.055935 | 3.155441  | -0.120646 |
| 6           | -4.285405 | -2.384894 | 0.572080  | 6  | -8.252250 | 1.024701  | 0.397132  |
| 1           | -4.232459 | -3.444986 | 0.285825  | 1  | -6.955204 | -0.687103 | 0.296839  |
| 1           | -3.295922 | -1.946097 | 0.437562  | 6  | -8.338910 | 2.416189  | 0.349817  |
| 1           | -4.517623 | -2.350615 | 1.644948  | 1  | -7.247617 | 4.264009  | 0.127798  |
| 6           | -7.635279 | 0.546442  | 1.922702  | 1  | -9.147132 | 0.428012  | 0.552318  |
| 1           | -8.069443 | -0.373001 | 1.516758  | 1  | -9.301801 | 2.906344  | 0.465785  |
| 1           | -8.008725 | 0.664336  | 2.949454  | 6  | 3.937155  | -1.792487 | 4.143355  |
| 1           | -8.031855 | 1.385778  | 1.338670  | 6  | 3.702411  | -1.243762 | 2.902637  |
| 6           | -5.552682 | 1.836609  | 2.516956  | 6  | 2.616102  | -0.352055 | 2.686726  |
| 1           | -5.845140 | 2.710452  | 1.920087  | 6  | 1.765247  | -0.048315 | 3.795446  |
| 1           | -5.950535 | 1.986843  | 3.530609  | 6  | 2.024159  | -0.639907 | 5.058107  |
| 1           | -4.459768 | 1.831249  | 2.568422  | 6  | 3.089837  | -1.492491 | 5.234512  |
| 1           | -0.481615 | 2.299726  | -1.339631 | 1  | 4.776342  | -2.468246 | 4.283117  |
| 14          | -5.352287 | 0.226755  | 0.160532  | 1  | 4.351082  | -1.493264 | 2.071996  |
|             |           |           |           | 6  | 2.340466  | 0.228271  | 1.402499  |
|             |           |           |           | 6  | 0.672750  | 0.831137  | 3.595036  |
| <b>TS3a</b> |           |           |           | 1  | 1.361232  | -0.402817 | 5.886526  |
| 45          | -0.499773 | 0.142869  | -1.437009 | 1  | 3.281141  | -1.936735 | 6.207276  |
| 17          | -2.852123 | 1.238609  | 1.098710  | 6  | 0.446052  | 1.402642  | 2.369863  |
| 6           | -2.413549 | 0.112307  | -2.616868 | 6  | 1.287431  | 1.127247  | 1.254584  |
| 6           | -1.897561 | -1.191708 | -2.367655 | 1  | 0.010553  | 1.047094  | 4.429753  |
| 6           | -3.716233 | 0.625463  | -2.012738 | 6  | 7.144012  | 1.350193  | -0.114125 |
| 1           | -2.265111 | 0.481900  | -3.632009 | 6  | 6.667646  | 0.460697  | -1.048944 |
| 1           | -1.462178 | 1.306771  | -2.064447 | 6  | 5.360206  | -0.080031 | -0.939375 |
| 1           | -2.370336 | -1.832592 | -1.629840 |    |           |           |           |

|    |           |           |           |             |           |           |           |
|----|-----------|-----------|-----------|-------------|-----------|-----------|-----------|
| 6  | 4.525035  | 0.314843  | 0.152010  | 1           | -1.189002 | -1.173471 | 1.141671  |
| 6  | 5.050954  | 1.232951  | 1.102295  | 6           | 0.170329  | -3.278482 | 3.449710  |
| 6  | 6.325566  | 1.735032  | 0.974117  | 1           | 2.019066  | -4.359187 | 3.189268  |
| 1  | 5.491267  | -1.328452 | -2.699273 | 1           | -1.603126 | -2.054706 | 3.434038  |
| 1  | 8.146467  | 1.758265  | -0.207472 | 1           | 0.003443  | -3.651871 | 4.456098  |
| 1  | 7.285863  | 0.156343  | -1.889786 | 6           | 0.886150  | -2.990905 | -1.924506 |
| 6  | 4.852195  | -1.005882 | -1.880903 | 6           | 0.962793  | -2.726596 | -3.303343 |
| 6  | 3.188726  | -0.192301 | 0.242227  | 6           | 0.724684  | -4.315647 | -1.504339 |
| 1  | 4.426261  | 1.543094  | 1.931500  | 6           | 0.919166  | -3.762315 | -4.233208 |
| 1  | 6.705178  | 2.438086  | 1.710269  | 1           | 1.040279  | -1.695214 | -3.638069 |
| 6  | 2.708265  | -1.079407 | -0.722763 | 6           | 0.661490  | -5.353576 | -2.438494 |
| 6  | 3.572942  | -1.492553 | -1.771449 | 1           | 0.637314  | -4.542758 | -0.448347 |
| 1  | -0.398221 | 2.067680  | 2.241437  | 6           | 0.767051  | -5.083251 | -3.801628 |
| 1  | 3.215240  | -2.202350 | -2.506272 | 1           | 0.987547  | -3.538459 | -5.294327 |
| 15 | 0.740137  | 1.737856  | -0.405228 | 1           | 0.529488  | -6.375842 | -2.094330 |
| 15 | 0.903764  | -1.542086 | -0.781010 | 1           | 0.720638  | -5.892206 | -4.525360 |
| 6  | 2.279004  | 2.269490  | -1.275818 |             |           |           |           |
| 6  | 3.209166  | 3.166208  | -0.734772 | <b>TS3b</b> |           |           |           |
| 6  | 2.505476  | 1.743966  | -2.554614 | 45          | 0.411419  | 0.809169  | -1.219309 |
| 6  | 4.353261  | 3.513750  | -1.449213 | 15          | 1.966502  | -0.019378 | 0.300911  |
| 1  | 3.055110  | 3.580372  | 0.255254  | 6           | 3.217269  | 1.204296  | 0.845122  |
| 6  | 3.651514  | 2.090625  | -3.269760 | 6           | 3.131508  | 2.520625  | 0.375934  |
| 1  | 1.775599  | 1.048182  | -2.961342 | 6           | 4.230547  | 0.856047  | 1.749843  |
| 6  | 4.579900  | 2.972792  | -2.716296 | 6           | 4.044580  | 3.481100  | 0.815355  |
| 1  | 5.078808  | 4.190936  | -1.008379 | 1           | 2.363253  | 2.773546  | -0.346430 |
| 1  | 3.823047  | 1.663569  | -4.254143 | 6           | 5.140297  | 1.816589  | 2.185852  |
| 1  | 5.479112  | 3.235991  | -3.266212 | 1           | 4.310432  | -0.165860 | 2.107829  |
| 6  | -0.010347 | 3.379458  | 0.005215  | 6           | 5.046692  | 3.131482  | 1.720298  |
| 6  | -1.103946 | 3.831958  | -0.740874 | 1           | 3.976880  | 4.498737  | 0.441446  |
| 6  | 0.508334  | 4.217263  | 1.005641  | 1           | 5.924286  | 1.540456  | 2.885434  |
| 6  | -1.663046 | 5.088228  | -0.504785 | 1           | 5.759100  | 3.878523  | 2.059177  |
| 1  | -1.520179 | 3.182172  | -1.503410 | 6           | 2.946298  | -1.515895 | -0.115091 |
| 6  | -0.053146 | 5.469517  | 1.250040  | 6           | 3.303959  | -2.469300 | 0.849702  |
| 1  | 1.338449  | 3.881302  | 1.618209  | 6           | 3.365628  | -1.691919 | -1.442203 |
| 6  | -1.140640 | 5.910534  | 0.493252  | 6           | 4.053060  | -3.589243 | 0.489821  |
| 1  | -2.512235 | 5.419748  | -1.096593 | 1           | 2.984226  | -2.349720 | 1.879069  |
| 1  | 0.357659  | 6.099650  | 2.034222  | 6           | 4.123241  | -2.809112 | -1.794541 |
| 1  | -1.579580 | 6.885701  | 0.685261  | 1           | 3.099274  | -0.951942 | -2.190002 |
| 6  | 0.628500  | -2.280351 | 0.874986  | 6           | 4.462928  | -3.763179 | -0.833184 |
| 6  | 1.534450  | -3.178272 | 1.458732  | 1           | 4.315793  | -4.325169 | 1.244664  |
| 6  | -0.508374 | -1.888744 | 1.590711  | 1           | 4.442711  | -2.934320 | -2.825278 |
| 6  | 1.302503  | -3.680500 | 2.736547  | 1           | 5.045523  | -4.636735 | -1.112385 |
| 1  | 2.435997  | -3.459196 | 0.921796  | 6           | 1.093469  | -0.454415 | 1.852903  |
| 6  | -0.732217 | -2.384015 | 2.875388  | 6           | 0.911830  | 0.517597  | 2.847271  |

|    |           |           |           |             |           |           |           |
|----|-----------|-----------|-----------|-------------|-----------|-----------|-----------|
| 6  | 0.425664  | -1.683599 | 1.970261  | 6           | -1.428689 | -2.596167 | -0.721323 |
| 6  | 0.082411  | 0.262839  | 3.940599  | 6           | -0.190785 | -2.765852 | -1.369087 |
| 1  | 1.414058  | 1.476066  | 2.762621  | 6           | -1.869366 | -3.616953 | 0.136045  |
| 6  | -0.398219 | -1.936473 | 3.066519  | 6           | 0.592852  | -3.897822 | -1.146349 |
| 1  | 0.533842  | -2.437674 | 1.201373  | 1           | 0.183959  | -1.984422 | -2.026661 |
| 6  | -0.574347 | -0.964389 | 4.053976  | 6           | -1.090234 | -4.754047 | 0.362956  |
| 1  | -0.048825 | 1.024606  | 4.703955  | 1           | -2.822720 | -3.514211 | 0.647052  |
| 1  | -0.909531 | -2.891954 | 3.134356  | 6           | 0.146020  | -4.891215 | -0.271496 |
| 1  | -1.220037 | -1.160865 | 4.905297  | 1           | 1.558683  | -3.991708 | -1.631722 |
| 17 | 2.117078  | 1.261352  | -2.847941 | 1           | -1.445310 | -5.529105 | 1.037484  |
| 6  | -1.072123 | 1.647508  | -0.474835 | 1           | 0.761432  | -5.767343 | -0.085786 |
| 6  | -1.494101 | 2.975238  | -0.108088 | 1           | -7.290835 | -1.194532 | 2.130440  |
| 6  | -2.666253 | 3.138692  | 0.654946  |             |           |           |           |
| 6  | -0.749511 | 4.105759  | -0.495383 | <b>TS4a</b> |           |           |           |
| 6  | -3.077520 | 4.413424  | 1.034072  | 45          | 0.815158  | -0.081598 | 1.047979  |
| 1  | -3.236227 | 2.257862  | 0.935927  | 17          | 0.732251  | -1.961234 | 2.663530  |
| 6  | -1.166515 | 5.375408  | -0.114758 | 6           | 1.562610  | 2.154297  | 3.150217  |
| 1  | 0.147328  | 3.959362  | -1.089548 | 6           | 1.973625  | 0.789116  | 2.604470  |
| 6  | -2.329086 | 5.529470  | 0.649951  | 6           | 1.038962  | 3.078983  | 2.039757  |
| 1  | -3.981250 | 4.539696  | 1.622844  | 1           | 0.810358  | 2.049754  | 3.931476  |
| 1  | -0.591636 | 6.247658  | -0.411191 | 1           | 2.440653  | 2.601669  | 3.639855  |
| 1  | -2.653083 | 6.523870  | 0.944001  | 1           | 1.994132  | 0.029962  | 3.383875  |
| 6  | -1.342884 | 0.348037  | -0.055118 | 1           | 2.979548  | 0.849857  | 2.174878  |
| 1  | -1.235300 | 0.202849  | 1.024224  | 1           | -0.050347 | 3.101748  | 2.075576  |
| 6  | -2.518672 | 1.066171  | -2.875860 | 1           | 1.376313  | 4.116778  | 2.157226  |
| 6  | -1.084062 | 1.564266  | -2.758669 | 14          | 1.601975  | 2.403370  | 0.358427  |
| 6  | -2.616764 | -0.462862 | -2.699509 | 6           | 0.721946  | 3.303199  | -1.042049 |
| 1  | -3.178244 | 1.573666  | -2.157755 | 6           | 0.165415  | 2.701325  | -2.176328 |
| 1  | -2.895415 | 1.343228  | -3.872245 | 6           | 0.667367  | 4.707044  | -0.950318 |
| 1  | -1.000870 | 2.649365  | -2.829225 | 6           | -0.422417 | 3.463033  | -3.187410 |
| 1  | -0.459449 | 1.114632  | -3.533519 | 1           | 0.163049  | 1.625035  | -2.266413 |
| 1  | -3.589410 | -0.831185 | -3.049474 | 6           | 0.075034  | 5.475469  | -1.951517 |
| 1  | -1.861081 | -0.948293 | -3.330158 | 1           | 1.103192  | 5.209701  | -0.089905 |
| 14 | -2.353763 | -0.971115 | -0.904300 | 6           | -0.469879 | 4.851923  | -3.077351 |
| 6  | -3.980097 | -1.066419 | 0.049017  | 1           | -0.859765 | 2.964283  | -4.045540 |
| 6  | -5.234443 | -1.110974 | -0.580797 | 1           | 0.045796  | 6.558204  | -1.858704 |
| 6  | -3.957212 | -1.067309 | 1.458126  | 6           | -4.786767 | 1.569638  | -3.885709 |
| 6  | -6.418267 | -1.156212 | 0.158663  | 6           | -4.280357 | 0.819844  | -2.848601 |
| 1  | -5.294728 | -1.108403 | -1.665879 | 6           | -3.554929 | 1.422830  | -1.779799 |
| 6  | -5.135360 | -1.116315 | 2.202981  | 6           | -3.406918 | 2.844167  | -1.805780 |
| 1  | -3.005315 | -1.034930 | 1.983603  | 6           | -3.939655 | 3.593049  | -2.887611 |
| 6  | -6.370973 | -1.159433 | 1.552974  | 6           | -4.611675 | 2.973638  | -3.913873 |
| 1  | -7.376262 | -1.188507 | -0.353583 | 1           | -5.331882 | 1.077921  | -4.686441 |
| 1  | -5.090912 | -1.119218 | 3.289106  | 1           | -4.439408 | -0.251283 | -2.843562 |



|    |           |           |           |    |           |           |           |
|----|-----------|-----------|-----------|----|-----------|-----------|-----------|
| 6  | -2.987900 | 0.659501  | -0.693989 | 6  | -2.153375 | 2.562207  | 5.788737  |
| 6  | -2.702686 | 3.476111  | -0.756038 | 1  | -0.900995 | 0.966750  | 6.528254  |
| 1  | -3.791316 | 4.669309  | -2.888838 | 1  | -3.383706 | 4.000720  | 4.757067  |
| 1  | -5.011979 | 3.554208  | -4.739921 | 1  | -2.310490 | 3.006634  | 6.767456  |
| 6  | -2.165033 | 2.738359  | 0.262690  | 6  | -0.201365 | -0.701256 | -2.726394 |
| 6  | -2.321647 | 1.324829  | 0.336774  | 6  | -1.272321 | -0.316508 | -3.536284 |
| 1  | -2.545305 | 4.549059  | -0.793284 | 6  | 1.101582  | -0.574800 | -3.236248 |
| 6  | -7.232553 | -2.128616 | 0.043377  | 6  | -1.052413 | 0.236899  | -4.798891 |
| 6  | -6.262865 | -3.043875 | -0.291985 | 1  | -2.283500 | -0.454815 | -3.190076 |
| 6  | -4.931568 | -2.629383 | -0.555514 | 6  | 1.324541  | -0.030238 | -4.497884 |
| 6  | -4.590249 | -1.244342 | -0.472268 | 1  | 1.938051  | -0.919432 | -2.649456 |
| 6  | -5.618989 | -0.327403 | -0.118164 | 6  | 0.246824  | 0.393554  | -5.280315 |
| 6  | -6.902264 | -0.756293 | 0.130329  | 1  | -1.905457 | 0.543846  | -5.397631 |
| 1  | -4.174889 | -4.611045 | -0.973836 | 1  | 2.341623  | 0.059520  | -4.868596 |
| 1  | -8.248631 | -2.455135 | 0.245545  | 1  | 0.420250  | 0.828761  | -6.260276 |
| 1  | -6.497436 | -4.103234 | -0.356203 | 6  | 0.328489  | -3.049548 | -1.302297 |
| 6  | -3.919329 | -3.557853 | -0.889883 | 6  | 0.824049  | -3.759353 | -0.202347 |
| 6  | -3.234563 | -0.821295 | -0.704283 | 6  | 0.410040  | -3.631857 | -2.579218 |
| 1  | -5.379164 | 0.724193  | -0.026576 | 6  | 1.400245  | -5.019956 | -0.373943 |
| 1  | -7.666291 | -0.035220 | 0.406369  | 1  | 0.769376  | -3.321892 | 0.787702  |
| 6  | -2.250420 | -1.776962 | -0.976295 | 6  | 0.990997  | -4.887363 | -2.748049 |
| 6  | -2.626305 | -3.145936 | -1.080741 | 1  | 0.022637  | -3.103721 | -3.442937 |
| 1  | -1.590505 | 3.249518  | 1.020053  | 6  | 1.490329  | -5.585292 | -1.645177 |
| 1  | -1.870624 | -3.886027 | -1.305235 | 1  | 1.788990  | -5.548681 | 0.491412  |
| 15 | -1.470629 | 0.437973  | 1.716176  | 1  | 1.053539  | -5.320910 | -3.742292 |
| 15 | -0.428593 | -1.384435 | -1.028449 | 1  | 1.948262  | -6.561263 | -1.779914 |
| 6  | -2.691731 | -0.891434 | 2.170306  | 1  | -0.931516 | 5.446703  | -3.861334 |
| 6  | -3.947974 | -0.489096 | 2.651484  | 6  | 3.402094  | 3.033080  | 0.201887  |
| 6  | -2.414962 | -2.258342 | 2.079741  | 6  | 4.104775  | 3.559832  | 1.296763  |
| 6  | -4.904835 | -1.429865 | 3.022055  | 6  | 4.059897  | 3.027889  | -1.041771 |
| 1  | -4.185703 | 0.565406  | 2.736019  | 6  | 5.410476  | 4.039364  | 1.165621  |
| 6  | -3.372091 | -3.199799 | 2.456536  | 1  | 3.638845  | 3.593312  | 2.275183  |
| 1  | -1.450465 | -2.588907 | 1.727275  | 6  | 5.363118  | 3.499168  | -1.182476 |
| 6  | -4.619561 | -2.791938 | 2.926285  | 1  | 3.540811  | 2.666382  | -1.926308 |
| 1  | -5.876669 | -1.096574 | 3.373744  | 6  | 6.047668  | 4.002308  | -0.072985 |
| 1  | -3.137263 | -4.256846 | 2.371727  | 1  | 5.929683  | 4.433781  | 2.035163  |
| 1  | -5.365873 | -3.527796 | 3.211703  | 1  | 5.843700  | 3.480231  | -2.157192 |
| 6  | -1.741338 | 1.422598  | 3.254919  | 1  | 7.065650  | 4.367625  | -0.177606 |
| 6  | -1.153095 | 0.854086  | 4.398874  | 6  | 2.659777  | -0.485158 | 0.112336  |
| 6  | -2.557586 | 2.549797  | 3.400993  | 6  | 2.212483  | 0.587796  | -0.473683 |
| 6  | -1.362196 | 1.418600  | 5.654678  | 14 | 4.098693  | -1.693917 | 0.030703  |
| 1  | -0.538582 | -0.036881 | 4.294868  | 6  | 5.692055  | -0.630770 | 0.099119  |
| 6  | -2.751779 | 3.122003  | 4.660852  | 1  | 5.647052  | -0.033597 | -0.822668 |
| 1  | -3.064393 | 2.977794  | 2.544282  | 6  | 3.979060  | -2.434710 | -1.746077 |

|             |           |           |           |    |           |           |           |
|-------------|-----------|-----------|-----------|----|-----------|-----------|-----------|
| 1           | 2.909986  | -2.615906 | -1.903783 | 6  | 0.583050  | 3.257147  | 0.614547  |
| 6           | 3.937146  | -2.934261 | 1.467170  | 6  | 0.901374  | 2.500705  | -1.656612 |
| 1           | 2.870234  | -3.175632 | 1.498674  | 6  | 1.545030  | 4.249205  | 0.415381  |
| 6           | 5.781400  | 0.375078  | 1.255827  | 1  | 0.091296  | 3.174412  | 1.576700  |
| 1           | 4.897250  | 1.012100  | 1.304249  | 6  | 1.858184  | 3.495014  | -1.854698 |
| 1           | 5.895654  | -0.121537 | 2.223638  | 1  | 0.652048  | 1.826658  | -2.468588 |
| 1           | 6.646099  | 1.037286  | 1.118356  | 6  | 2.191356  | 4.367088  | -0.815286 |
| 6           | 6.965142  | -1.494501 | 0.037528  | 1  | 1.785864  | 4.932574  | 1.225305  |
| 1           | 6.977791  | -2.164376 | -0.829251 | 1  | 2.346404  | 3.585169  | -2.821201 |
| 1           | 7.861131  | -0.861507 | -0.022126 | 1  | 2.942402  | 5.136907  | -0.967532 |
| 1           | 7.067635  | -2.114318 | 0.936109  | 6  | -1.745202 | 1.373211  | 1.391730  |
| 6           | 4.448375  | -1.400191 | -2.789155 | 6  | -3.025730 | 1.929822  | 1.491393  |
| 1           | 5.540083  | -1.305529 | -2.782349 | 6  | -1.050206 | 1.046497  | 2.567418  |
| 1           | 4.154064  | -1.712004 | -3.800579 | 6  | -3.598156 | 2.161417  | 2.744455  |
| 1           | 4.040184  | -0.397786 | -2.617085 | 1  | -3.583307 | 2.170892  | 0.593367  |
| 6           | 4.688737  | -3.773851 | -2.009909 | 6  | -1.616683 | 1.290708  | 3.816294  |
| 1           | 4.224889  | -4.592331 | -1.458421 | 1  | -0.063197 | 0.605767  | 2.502044  |
| 1           | 4.625505  | -4.026248 | -3.077668 | 6  | -2.896622 | 1.844032  | 3.908406  |
| 1           | 5.751501  | -3.744389 | -1.744722 | 1  | -4.594533 | 2.590354  | 2.808433  |
| 6           | 4.266387  | -2.269895 | 2.817018  | 1  | -1.058750 | 1.039371  | 4.713931  |
| 1           | 3.945494  | -2.920057 | 3.640460  | 1  | -3.344409 | 2.025072  | 4.881632  |
| 1           | 5.344631  | -2.104360 | 2.925691  | 17 | 1.348635  | -0.883108 | -2.139986 |
| 1           | 3.754705  | -1.313852 | 2.943808  | 6  | -1.863103 | -1.973155 | 0.855307  |
| 6           | 4.722312  | -4.250077 | 1.334531  | 6  | -3.224657 | -2.025517 | 0.405026  |
| 1           | 4.348209  | -4.876947 | 0.522055  | 6  | -3.586287 | -2.767513 | -0.735355 |
| 1           | 5.791560  | -4.083014 | 1.158865  | 6  | -4.203833 | -1.259882 | 1.064908  |
| 1           | 4.634916  | -4.830993 | 2.262938  | 6  | -4.895342 | -2.734428 | -1.206758 |
| 1           | 2.313518  | 0.981899  | -1.481224 | 1  | -2.827266 | -3.349078 | -1.247575 |
|             |           |           |           | 6  | -5.509482 | -1.228165 | 0.581244  |
|             |           |           |           | 1  | -3.921869 | -0.680688 | 1.936317  |
| <b>TS4b</b> |           |           |           | 6  | -5.859444 | -1.959160 | -0.556022 |
| 45          | -0.232225 | -1.376310 | -0.409487 | 1  | -5.163775 | -3.310626 | -2.087830 |
| 15          | -0.930288 | 0.971825  | -0.204678 | 1  | -6.254670 | -0.624204 | 1.091355  |
| 6           | -2.198888 | 1.414206  | -1.459381 | 1  | -6.877700 | -1.926913 | -0.932825 |
| 6           | -2.884260 | 0.380266  | -2.109360 | 6  | -0.827914 | -1.878162 | 1.550202  |
| 6           | -2.529180 | 2.745464  | -1.758245 | 1  | -0.243776 | -1.968064 | 2.444220  |
| 6           | -3.898492 | 0.666102  | -3.023968 | 6  | 1.276674  | -3.978249 | 0.144009  |
| 1           | -2.625287 | -0.649338 | -1.892896 | 6  | 0.140613  | -3.414148 | -0.708325 |
| 6           | -3.537287 | 3.030992  | -2.677575 | 6  | 2.609563  | -3.270026 | -0.135138 |
| 1           | -1.995471 | 3.554937  | -1.269676 | 1  | 1.016034  | -3.871566 | 1.205507  |
| 6           | -4.226984 | 1.991444  | -3.308604 | 1  | 1.401328  | -5.060150 | -0.027571 |
| 1           | -4.427603 | -0.148914 | -3.509037 | 1  | -0.784955 | -3.962653 | -0.493451 |
| 1           | -3.786215 | 4.064583  | -2.902037 | 1  | 0.368971  | -3.541928 | -1.776724 |
| 1           | -5.014067 | 2.217212  | -4.022784 | 1  | 3.384454  | -3.562041 | 0.587128  |
| 6           | 0.259766  | 2.363340  | -0.414372 |    |           |           |           |

|            |           |           |           |   |           |           |           |
|------------|-----------|-----------|-----------|---|-----------|-----------|-----------|
| 1          | 2.985893  | -3.558383 | -1.125942 | 6 | 1.544684  | 6.690282  | 0.495023  |
| 14         | 2.472300  | -1.389868 | -0.172234 | 1 | 3.672146  | 6.658281  | 0.835863  |
| 6          | 2.338990  | -0.557904 | 1.514245  | 1 | -0.544376 | 6.422950  | 0.025473  |
| 6          | 2.544641  | 0.824994  | 1.658265  | 1 | 1.410455  | 7.690538  | 0.898230  |
| 6          | 2.146147  | -1.319987 | 2.680968  | 6 | 3.898562  | 1.904309  | -1.227725 |
| 6          | 2.514489  | 1.430908  | 2.913805  | 6 | 4.569407  | 1.871100  | 0.008034  |
| 1          | 2.736416  | 1.437424  | 0.784698  | 6 | 4.649561  | 1.613616  | -2.378159 |
| 6          | 2.126688  | -0.719644 | 3.940562  | 6 | 5.934156  | 1.600803  | 0.088200  |
| 1          | 2.016103  | -2.395986 | 2.605252  | 1 | 4.018525  | 2.069306  | 0.923865  |
| 6          | 2.300235  | 0.662021  | 4.059550  | 6 | 6.011187  | 1.310693  | -2.304747 |
| 1          | 2.659298  | 2.504511  | 2.993935  | 1 | 4.171612  | 1.630049  | -3.353661 |
| 1          | 1.982623  | -1.329452 | 4.828723  | 6 | 6.660229  | 1.314824  | -1.070652 |
| 1          | 2.281765  | 1.132316  | 5.038831  | 1 | 6.428963  | 1.598528  | 1.054669  |
| 6          | 4.096962  | -0.665450 | -0.821750 | 1 | 6.564951  | 1.082831  | -3.211735 |
| 6          | 5.293321  | -1.356893 | -0.565483 | 1 | 7.721718  | 1.090985  | -1.008892 |
| 6          | 4.189032  | 0.586403  | -1.453359 | 6 | -6.997186 | -0.321129 | -0.541857 |
| 6          | 6.531697  | -0.823634 | -0.929151 | 6 | -5.711521 | -0.552346 | -0.106053 |
| 1          | 5.266938  | -2.327529 | -0.076874 | 6 | -4.738955 | 0.484217  | -0.098798 |
| 6          | 5.423106  | 1.128914  | -1.808796 | 6 | -5.127823 | 1.769020  | -0.592774 |
| 1          | 3.286493  | 1.146375  | -1.673683 | 6 | -6.454695 | 1.973934  | -1.048083 |
| 6          | 6.599987  | 0.423593  | -1.549882 | 6 | -7.377531 | 0.953412  | -1.017880 |
| 1          | 7.441468  | -1.383290 | -0.727959 | 1 | -7.722440 | -1.129730 | -0.528517 |
| 1          | 5.465033  | 2.102190  | -2.291293 | 1 | -5.432251 | -1.539047 | 0.240164  |
| 1          | 7.562543  | 0.842154  | -1.831352 | 6 | -3.392913 | 0.277731  | 0.369982  |
|            |           |           |           | 6 | -4.160886 | 2.805192  | -0.640437 |
| <b>TS4</b> |           |           |           | 1 | -6.727951 | 2.957269  | -1.422412 |
| 45         | 0.432709  | 0.613476  | -1.108853 | 1 | -8.393321 | 1.122527  | -1.363504 |
| 6          | 0.620099  | 1.394332  | -3.285725 | 6 | -2.889365 | 2.596331  | -0.175588 |
| 6          | 1.270009  | 0.138946  | -3.045537 | 6 | -2.497606 | 1.345080  | 0.380993  |
| 6          | 1.501097  | 2.626068  | -3.144443 | 1 | -4.443085 | 3.770230  | -1.053791 |
| 1          | -0.371119 | 1.698978  | -2.145846 | 6 | -4.499953 | -2.843352 | 4.350242  |
| 1          | -0.211697 | 1.402350  | -3.992071 | 6 | -3.669683 | -3.573977 | 3.532594  |
| 1          | 0.849080  | -0.763879 | -3.473071 | 6 | -3.161528 | -3.020230 | 2.328904  |
| 1          | 2.352855  | 0.125668  | -2.966569 | 6 | -3.515020 | -1.681860 | 1.966975  |
| 1          | 0.914430  | 3.549073  | -3.196102 | 6 | -4.368439 | -0.952934 | 2.840068  |
| 1          | 2.259588  | 2.664112  | -3.935261 | 6 | -4.852481 | -1.519711 | 3.996202  |
| 14         | 2.075469  | 2.372469  | -1.322820 | 1 | -2.036343 | -4.773239 | 1.747418  |
| 6          | 1.888228  | 4.079767  | -0.529415 | 1 | -4.883411 | -3.277279 | 5.269246  |
| 6          | 2.978843  | 4.817886  | -0.043120 | 1 | -3.385151 | -4.589341 | 3.796274  |
| 6          | 0.624626  | 4.695274  | -0.505321 | 6 | -2.303634 | -3.755222 | 1.476276  |
| 6          | 2.811034  | 6.108452  | 0.464128  | 6 | -2.985726 | -1.110402 | 0.765608  |
| 1          | 3.973373  | 4.383852  | -0.061609 | 1 | -4.628210 | 0.068001  | 2.586949  |
| 6          | 0.447555  | 5.979402  | 0.001821  | 1 | -5.501293 | -0.942888 | 4.649113  |
| 1          | -0.236943 | 4.147802  | -0.879838 | 6 | -2.131833 | -1.865015 | -0.043210 |

|    |           |           |           |             |           |           |           |
|----|-----------|-----------|-----------|-------------|-----------|-----------|-----------|
| 6  | -1.804065 | -3.195215 | 0.326671  | 1           | -2.211103 | -2.705911 | -3.940023 |
| 1  | -2.160953 | 3.397195  | -0.229942 | 6           | 0.541812  | -4.691365 | -3.824315 |
| 1  | -1.145318 | -3.776054 | -0.306671 | 1           | 2.136962  | -4.507429 | -2.380202 |
| 15 | -0.724040 | 1.171866  | 0.864057  | 1           | -1.169094 | -4.588158 | -5.132243 |
| 15 | -1.316848 | -1.103469 | -1.519440 | 1           | 1.001259  | -5.520876 | -4.354607 |
| 6  | -0.766861 | 0.035366  | 2.325159  | 6           | 1.783434  | -0.537259 | -0.176896 |
| 6  | -1.481530 | 0.437874  | 3.465275  | 6           | 2.647958  | -1.266249 | 0.314838  |
| 6  | -0.095282 | -1.189623 | 2.343767  | 14          | 3.957505  | -2.432030 | 0.775357  |
| 6  | -1.539190 | -0.378841 | 4.590350  | 6           | 4.599635  | -2.105804 | 2.543797  |
| 1  | -2.000994 | 1.389644  | 3.474724  | 1           | 5.353464  | -2.881253 | 2.750050  |
| 6  | -0.153541 | -2.004497 | 3.475018  | 6           | 3.286133  | -4.226925 | 0.638543  |
| 1  | 0.482683  | -1.497371 | 1.485298  | 1           | 3.285146  | -4.435351 | -0.442437 |
| 6  | -0.876154 | -1.607274 | 4.597937  | 6           | 5.364567  | -2.147067 | -0.483053 |
| 1  | -2.112331 | -0.060748 | 5.456215  | 1           | 5.595606  | -1.080925 | -0.365534 |
| 1  | 0.365882  | -2.956939 | 3.466388  | 6           | 3.490773  | -2.223486 | 3.601500  |
| 1  | -0.926443 | -2.248956 | 5.472830  | 1           | 3.877882  | -2.000521 | 4.605856  |
| 6  | -0.318577 | 2.695789  | 1.810424  | 1           | 2.675906  | -1.520074 | 3.397574  |
| 6  | 1.030688  | 2.841059  | 2.161931  | 1           | 3.057311  | -3.228876 | 3.633630  |
| 6  | -1.251888 | 3.616307  | 2.300617  | 6           | 5.288022  | -0.736772 | 2.650071  |
| 6  | 1.443430  | 3.902581  | 2.960707  | 1           | 4.587459  | 0.068266  | 2.399448  |
| 1  | 1.755359  | 2.117226  | 1.799967  | 1           | 5.653406  | -0.556393 | 3.670956  |
| 6  | -0.835297 | 4.684621  | 3.096396  | 1           | 6.140549  | -0.652708 | 1.968593  |
| 1  | -2.305612 | 3.505148  | 2.071056  | 6           | 4.207403  | -5.260786 | 1.310036  |
| 6  | 0.511932  | 4.834949  | 3.421066  | 1           | 3.842650  | -6.283955 | 1.142481  |
| 1  | 2.495211  | 4.014900  | 3.204274  | 1           | 5.234673  | -5.210989 | 0.934850  |
| 1  | -1.568085 | 5.398988  | 3.461712  | 1           | 4.247355  | -5.105671 | 2.395228  |
| 1  | 0.836728  | 5.673814  | 4.029633  | 6           | 1.843002  | -4.402663 | 1.139236  |
| 6  | -2.798792 | -0.607453 | -2.495654 | 1           | 1.792716  | -4.316733 | 2.230696  |
| 6  | -3.878580 | -1.495183 | -2.634198 | 1           | 1.167084  | -3.652079 | 0.723335  |
| 6  | -2.893645 | 0.661179  | -3.075888 | 1           | 1.451008  | -5.395453 | 0.875590  |
| 6  | -5.013244 | -1.126295 | -3.351258 | 6           | 6.653346  | -2.939759 | -0.219519 |
| 1  | -3.838036 | -2.468588 | -2.155108 | 1           | 6.507832  | -4.013169 | -0.392859 |
| 6  | -4.033449 | 1.033718  | -3.789022 | 1           | 7.459574  | -2.613829 | -0.891744 |
| 1  | -2.095393 | 1.375092  | -2.925883 | 1           | 7.012994  | -2.817717 | 0.809305  |
| 6  | -5.094156 | 0.141466  | -3.931635 | 6           | 4.879481  | -2.337612 | -1.928831 |
| 1  | -5.845418 | -1.818747 | -3.436095 | 1           | 4.650222  | -3.390976 | -2.140827 |
| 1  | -4.097711 | 2.031349  | -4.214103 | 1           | 3.975894  | -1.750123 | -2.120365 |
| 1  | -5.987242 | 0.435512  | -4.474878 | 1           | 5.647837  | -2.020565 | -2.647310 |
| 6  | -0.648905 | -2.545311 | -2.454399 |             |           |           |           |
| 6  | 0.594250  | -3.056468 | -2.041841 |             |           |           |           |
| 6  | -1.270284 | -3.103437 | -3.579933 | <b>TS5a</b> |           |           |           |
| 6  | 1.176215  | -4.128082 | -2.714847 | 45          | -0.223980 | 1.059901  | 0.960792  |
| 1  | 1.122288  | -2.584643 | -1.220582 | 17          | 0.531512  | 2.651727  | 2.975746  |
| 6  | -0.676067 | -4.169606 | -4.259089 | 6           | -2.862299 | -0.574529 | 2.763817  |
|    |           |           |           | 6           | -2.126846 | 0.683069  | 2.269251  |

|    |           |           |           |    |           |           |           |
|----|-----------|-----------|-----------|----|-----------|-----------|-----------|
| 6  | -2.667379 | -1.917535 | 2.026605  | 1  | 4.528516  | -2.858180 | -0.238873 |
| 1  | -2.581590 | -0.724826 | 3.812615  | 1  | 6.857713  | -3.404587 | 0.310480  |
| 1  | -3.935590 | -0.347140 | 2.771439  | 6  | 3.082810  | 0.976200  | -0.568407 |
| 1  | -1.374470 | 1.005168  | 2.989659  | 6  | 4.062717  | 1.987579  | -0.398309 |
| 1  | -2.822155 | 1.510829  | 2.201446  | 1  | -0.415123 | -2.813047 | 0.475321  |
| 1  | -1.607248 | -2.156697 | 1.979360  | 1  | 3.771989  | 3.027844  | -0.456933 |
| 1  | -3.129045 | -2.720224 | 2.615825  | 15 | 1.125751  | -0.627824 | 1.592383  |
| 14 | -3.400171 | -1.802056 | 0.313771  | 15 | 1.292683  | 1.444509  | -0.758000 |
| 6  | -2.956400 | -3.256357 | -0.804560 | 6  | 2.807155  | -0.330223 | 2.308238  |
| 6  | -2.922582 | -3.099404 | -2.200382 | 6  | 3.566680  | -1.467602 | 2.628565  |
| 6  | -2.704519 | -4.536672 | -0.284622 | 6  | 3.314749  | 0.936408  | 2.600502  |
| 6  | -2.653611 | -4.174976 | -3.047252 | 6  | 4.823542  | -1.335383 | 3.209558  |
| 1  | -3.106044 | -2.118125 | -2.631904 | 1  | 3.182902  | -2.459281 | 2.412605  |
| 6  | -2.430008 | -5.619357 | -1.123854 | 6  | 4.574359  | 1.063207  | 3.188283  |
| 1  | -2.719028 | -4.692639 | 0.792004  | 1  | 2.714813  | 1.812977  | 2.397735  |
| 6  | -2.405661 | -5.440422 | -2.509019 | 6  | 5.334061  | -0.065909 | 3.488283  |
| 1  | -2.635325 | -4.028718 | -4.124271 | 1  | 5.408216  | -2.222835 | 3.432140  |
| 1  | -2.235012 | -6.600518 | -0.698916 | 1  | 4.958314  | 2.055404  | 3.407204  |
| 6  | 3.673343  | -2.810149 | -4.049643 | 1  | 6.317272  | 0.038560  | 3.938039  |
| 6  | 3.598287  | -2.037341 | -2.912776 | 6  | 0.517588  | -1.665785 | 2.979639  |
| 6  | 2.573860  | -2.247166 | -1.949262 | 6  | 0.148750  | -0.970303 | 4.141786  |
| 6  | 1.602954  | -3.264566 | -2.214067 | 6  | 0.551914  | -3.066372 | 2.995514  |
| 6  | 1.700560  | -4.038643 | -3.397922 | 6  | -0.232078 | -1.672320 | 5.283304  |
| 6  | 2.718842  | -3.823103 | -4.297969 | 1  | 0.178972  | 0.116364  | 4.152776  |
| 1  | 4.467231  | -2.631123 | -4.769156 | 6  | 0.165545  | -3.762545 | 4.141037  |
| 1  | 4.325725  | -1.253123 | -2.746465 | 1  | 0.874663  | -3.618328 | 2.120365  |
| 6  | 2.471016  | -1.465837 | -0.747597 | 6  | -0.238570 | -3.068975 | 5.282290  |
| 6  | 0.532512  | -3.449101 | -1.305594 | 1  | -0.521859 | -1.124454 | 6.175263  |
| 1  | 0.944435  | -4.797812 | -3.579841 | 1  | 0.185890  | -4.848804 | 4.140087  |
| 1  | 2.787716  | -4.421451 | -5.202031 | 1  | -0.542307 | -3.613736 | 6.171640  |
| 6  | 0.438540  | -2.683197 | -0.174061 | 6  | 0.966037  | 0.625688  | -2.371919 |
| 6  | 1.426899  | -1.711979 | 0.144539  | 6  | 1.858672  | 0.804462  | -3.442208 |
| 1  | -0.228124 | -4.188668 | -1.524888 | 6  | -0.100033 | -0.265884 | -2.509722 |
| 6  | 7.506472  | -1.337318 | 0.406851  | 6  | 1.661843  | 0.126501  | -4.641714 |
| 6  | 7.126913  | -0.021022 | 0.286307  | 1  | 2.722635  | 1.451416  | -3.325254 |
| 6  | 5.788518  | 0.323660  | -0.035470 | 6  | -0.279270 | -0.960934 | -3.706059 |
| 6  | 4.823572  | -0.712564 | -0.238044 | 1  | -0.769476 | -0.429931 | -1.675126 |
| 6  | 5.250995  | -2.062507 | -0.104608 | 6  | 0.591904  | -0.762233 | -4.774590 |
| 6  | 6.555823  | -2.366213 | 0.207544  | 1  | 2.359742  | 0.267556  | -5.461953 |
| 1  | 6.109136  | 2.461069  | -0.011152 | 1  | -1.088015 | -1.679138 | -3.786343 |
| 1  | 8.532544  | -1.590613 | 0.657527  | 1  | 0.456577  | -1.314908 | -5.699608 |
| 1  | 7.845007  | 0.779729  | 0.442703  | 6  | 1.390595  | 3.247292  | -1.114848 |
| 6  | 5.374507  | 1.671509  | -0.146559 | 6  | 1.620176  | 4.103839  | -0.023610 |
| 6  | 3.461810  | -0.367013 | -0.517700 | 6  | 1.288877  | 3.793775  | -2.400969 |

|    |           |           |           |             |           |           |           |
|----|-----------|-----------|-----------|-------------|-----------|-----------|-----------|
| 6  | 1.791997  | 5.471670  | -0.228295 | 1           | -3.169513 | 4.409072  | -3.021377 |
| 1  | 1.637580  | 3.702603  | 0.986286  | 6           | -2.552088 | 4.225234  | 1.974496  |
| 6  | 1.445744  | 5.167021  | -2.597531 | 1           | -2.026720 | 4.995122  | 2.551867  |
| 1  | 1.081020  | 3.156006  | -3.251313 | 1           | -3.582007 | 4.566170  | 1.824571  |
| 6  | 1.711655  | 6.006914  | -1.515707 | 1           | -2.567421 | 3.332648  | 2.599029  |
| 1  | 1.968200  | 6.119072  | 0.625579  | 6           | -1.696739 | 5.375661  | -0.072872 |
| 1  | 1.357018  | 5.576911  | -3.599577 | 1           | -0.938897 | 5.366094  | -0.854850 |
| 1  | 1.836420  | 7.074599  | -1.672409 | 1           | -2.643746 | 5.706627  | -0.513650 |
| 1  | -2.195703 | -6.281405 | -3.164385 | 1           | -1.391333 | 6.137670  | 0.656283  |
| 6  | -5.285056 | -1.727012 | 0.417908  | 1           | -3.479627 | 0.151834  | -1.226314 |
| 6  | -5.987834 | -2.055800 | 1.587849  |             |           |           |           |
| 6  | -6.031366 | -1.270901 | -0.683514 |             |           |           |           |
| 6  | -7.376427 | -1.926997 | 1.662000  |             |           |           |           |
| 1  | -5.446186 | -2.408588 | 2.461841  |             |           |           |           |
| 6  | -7.417628 | -1.140306 | -0.619572 |             |           |           |           |
| 1  | -5.522763 | -1.005159 | -1.608087 |             |           |           |           |
| 6  | -8.094307 | -1.465845 | 0.558470  |             |           |           |           |
| 1  | -7.896247 | -2.181889 | 2.581900  |             |           |           |           |
| 1  | -7.970426 | -0.781511 | -1.483895 |             |           |           |           |
| 1  | -9.174255 | -1.359393 | 0.614770  |             |           |           |           |
| 6  | -2.037351 | 0.725871  | 0.183141  |             |           |           |           |
| 6  | -2.871459 | -0.181920 | -0.387230 |             |           |           |           |
| 14 | -2.551396 | 2.588891  | -0.435380 |             |           |           |           |
| 6  | -4.477840 | 2.587310  | -0.354755 |             |           |           |           |
| 1  | -4.770789 | 1.897500  | -1.158752 |             |           |           |           |
| 6  | -2.054975 | 2.647890  | -2.313329 |             |           |           |           |
| 1  | -1.000546 | 2.356298  | -2.330878 |             |           |           |           |
| 6  | -1.814863 | 4.014072  | 0.636794  |             |           |           |           |
| 1  | -0.798531 | 3.711897  | 0.909325  |             |           |           |           |
| 6  | -5.124447 | 2.047477  | 0.930277  |             |           |           |           |
| 1  | -4.798252 | 1.028890  | 1.145228  |             |           |           |           |
| 1  | -4.898701 | 2.675639  | 1.797765  |             |           |           |           |
| 1  | -6.216623 | 2.018897  | 0.819329  |             |           |           |           |
| 6  | -5.068028 | 3.966729  | -0.707214 |             |           |           |           |
| 1  | -4.713230 | 4.343082  | -1.671281 |             |           |           |           |
| 1  | -6.163715 | 3.907154  | -0.760869 |             |           |           |           |
| 1  | -4.822666 | 4.717679  | 0.050780  |             |           |           |           |
| 6  | -2.804471 | 1.635434  | -3.202416 |             |           |           |           |
| 1  | -3.885325 | 1.822474  | -3.206401 |             |           |           |           |
| 1  | -2.455720 | 1.727465  | -4.239328 |             |           |           |           |
| 1  | -2.634613 | 0.601961  | -2.903903 |             |           |           |           |
| 6  | -2.146197 | 4.019320  | -3.012391 |             |           |           |           |
| 1  | -1.503681 | 4.772922  | -2.563870 |             |           |           |           |
| 1  | -1.838495 | 3.911386  | -4.061745 |             |           |           |           |
|    |           |           |           | <b>TS5b</b> |           |           |           |
|    |           |           |           | 45          | -0.642229 | 0.135531  | -1.582365 |
|    |           |           |           | 17          | 1.464996  | -0.578385 | 1.126109  |
|    |           |           |           | 6           | 1.108058  | -0.741329 | -2.691961 |
|    |           |           |           | 6           | 0.916944  | 0.659207  | -2.923952 |
|    |           |           |           | 6           | 2.320739  | -1.305915 | -1.954843 |
|    |           |           |           | 1           | 0.798401  | -1.391069 | -3.511281 |
|    |           |           |           | 1           | 0.025031  | -1.364167 | -1.752494 |
|    |           |           |           | 1           | 1.585908  | 1.379230  | -2.459521 |
|    |           |           |           | 1           | 0.502904  | 0.973199  | -3.880314 |
|    |           |           |           | 1           | 3.183524  | -1.282329 | -2.640212 |
|    |           |           |           | 1           | 2.157859  | -2.370213 | -1.736219 |
|    |           |           |           | 14          | 2.962370  | -0.579319 | -0.335861 |
|    |           |           |           | 6           | 4.286433  | -1.746102 | 0.288342  |
|    |           |           |           | 6           | 3.946295  | -3.016509 | 0.787803  |
|    |           |           |           | 6           | 5.644994  | -1.397062 | 0.221044  |
|    |           |           |           | 6           | 4.932968  | -3.910083 | 1.200352  |
|    |           |           |           | 1           | 2.899740  | -3.301753 | 0.871884  |
|    |           |           |           | 6           | 6.635745  | -2.290931 | 0.632053  |
|    |           |           |           | 1           | 5.930598  | -0.415848 | -0.149143 |
|    |           |           |           | 6           | 6.280428  | -3.548343 | 1.120843  |
|    |           |           |           | 1           | 4.653638  | -4.885832 | 1.588574  |
|    |           |           |           | 1           | 7.682266  | -2.003903 | 0.575715  |
|    |           |           |           | 6           | -4.462368 | 2.128065  | 1.895282  |
|    |           |           |           | 6           | -3.592468 | 2.566254  | 2.892604  |
|    |           |           |           | 6           | -4.074972 | 1.109627  | 1.020962  |
|    |           |           |           | 6           | -2.324244 | 1.992318  | 3.007007  |
|    |           |           |           | 6           | -1.930962 | 0.988575  | 2.127182  |
|    |           |           |           | 6           | -2.809724 | 0.521981  | 1.135234  |
|    |           |           |           | 1           | -1.629568 | 2.347585  | 3.761773  |
|    |           |           |           | 1           | -0.933009 | 0.569242  | 2.201137  |
|    |           |           |           | 15          | -2.186116 | -0.709806 | -0.076194 |
|    |           |           |           | 6           | -3.727962 | -1.379736 | -0.830035 |

|   |           |           |           |             |           |           |           |
|---|-----------|-----------|-----------|-------------|-----------|-----------|-----------|
| 6 | -4.729693 | -1.994473 | -0.064160 | 6           | 4.279933  | 3.263004  | 0.567951  |
| 6 | -3.893993 | -1.277197 | -2.216630 | 1           | 3.354772  | 1.630973  | 1.613813  |
| 6 | -5.881458 | -2.485968 | -0.674956 | 6           | 4.752438  | 3.735747  | -0.658042 |
| 1 | -4.604612 | -2.090802 | 1.010180  | 1           | 5.044393  | 3.287584  | -2.747031 |
| 6 | -5.047941 | -1.771619 | -2.829014 | 1           | 4.335660  | 3.892504  | 1.451665  |
| 1 | -3.103324 | -0.814190 | -2.800533 | 1           | 5.174956  | 4.733962  | -0.730305 |
| 6 | -6.043088 | -2.373755 | -2.059262 |             |           |           |           |
| 1 | -6.652234 | -2.960340 | -0.073594 |             |           |           |           |
| 1 | -5.166446 | -1.689041 | -3.906067 |             |           |           |           |
| 1 | -6.940910 | -2.759998 | -2.534059 |             |           |           |           |
| 6 | -1.674160 | -2.123259 | 0.998694  |             |           |           |           |
| 6 | -0.861562 | -3.121462 | 0.443851  |             |           |           |           |
| 6 | -2.086117 | -2.255382 | 2.331379  |             |           |           |           |
| 6 | -0.467939 | -4.223721 | 1.199384  |             |           |           |           |
| 1 | -0.525308 | -3.017991 | -0.583264 |             |           |           |           |
| 6 | -1.683065 | -3.354069 | 3.093305  |             |           |           |           |
| 1 | -2.710468 | -1.491925 | 2.782763  |             |           |           |           |
| 6 | -0.873042 | -4.340334 | 2.531150  |             |           |           |           |
| 1 | 0.162460  | -4.987637 | 0.751598  |             |           |           |           |
| 1 | -2.003367 | -3.435915 | 4.128444  |             |           |           |           |
| 1 | -0.556938 | -5.192613 | 3.126224  |             |           |           |           |
| 1 | -5.447474 | 2.575856  | 1.794760  |             |           |           |           |
| 1 | -3.893703 | 3.360458  | 3.569901  |             |           |           |           |
| 1 | -4.760895 | 0.770833  | 0.251972  |             |           |           |           |
| 6 | 0.640388  | 3.828049  | 1.549882  |             |           |           |           |
| 6 | -0.248552 | 4.827030  | 1.954348  |             |           |           |           |
| 6 | -1.478875 | 4.963431  | 1.305579  |             |           |           |           |
| 6 | -1.822179 | 4.108213  | 0.263235  |             |           |           |           |
| 6 | -0.934327 | 3.095533  | -0.144325 |             |           |           |           |
| 6 | 0.301647  | 2.965939  | 0.512129  |             |           |           |           |
| 1 | 1.601233  | 3.717801  | 2.044030  |             |           |           |           |
| 1 | 0.014377  | 5.495582  | 2.769644  |             |           |           |           |
| 1 | -2.177440 | 5.734064  | 1.620081  |             |           |           |           |
| 1 | -2.785547 | 4.194515  | -0.228093 |             |           |           |           |
| 1 | 0.975904  | 2.178403  | 0.201649  |             |           |           |           |
| 6 | -1.293240 | 2.201486  | -1.206645 |             |           |           |           |
| 6 | -1.866255 | 1.743522  | -2.222512 |             |           |           |           |
| 1 | -2.455803 | 1.800056  | -3.119103 |             |           |           |           |
| 1 | 7.049973  | -4.244082 | 1.444131  |             |           |           |           |
| 6 | 3.636175  | 1.157019  | -0.474332 |             |           |           |           |
| 6 | 4.126192  | 1.645954  | -1.697371 |             |           |           |           |
| 6 | 3.730220  | 1.985079  | 0.657585  |             |           |           |           |
| 6 | 4.679069  | 2.924045  | -1.790704 |             |           |           |           |
| 1 | 4.064526  | 1.032020  | -2.591805 |             |           |           |           |
|   |           |           |           | <b>TS6a</b> |           |           |           |
|   |           |           |           | 45          | -1.237195 | 0.401359  | -0.360924 |
|   |           |           |           | 6           | -3.524655 | 2.995273  | -2.076410 |
|   |           |           |           | 6           | -2.878876 | 1.581754  | -2.098019 |
|   |           |           |           | 6           | -4.675731 | 2.794859  | -1.046047 |
|   |           |           |           | 1           | -2.804224 | 3.726240  | -1.693421 |
|   |           |           |           | 1           | -3.846007 | 3.349832  | -3.064473 |
|   |           |           |           | 1           | -1.797819 | 1.551453  | -2.293244 |
|   |           |           |           | 1           | -3.354148 | 0.925078  | -2.836485 |
|   |           |           |           | 1           | -4.842752 | 3.638088  | -0.368494 |
|   |           |           |           | 1           | -5.625036 | 2.563818  | -1.542973 |
|   |           |           |           | 14          | -3.805815 | 1.200372  | -0.420624 |
|   |           |           |           | 6           | -2.984577 | 1.560303  | 1.248147  |
|   |           |           |           | 6           | -2.415064 | 2.823147  | 1.508961  |
|   |           |           |           | 6           | -3.004873 | 0.623674  | 2.303945  |
|   |           |           |           | 6           | -1.867078 | 3.134651  | 2.753482  |
|   |           |           |           | 1           | -2.399300 | 3.576066  | 0.728988  |
|   |           |           |           | 6           | -2.480533 | 0.937748  | 3.557292  |
|   |           |           |           | 1           | -3.447872 | -0.352978 | 2.132587  |
|   |           |           |           | 6           | -1.902122 | 2.190594  | 3.782100  |
|   |           |           |           | 1           | -1.412456 | 4.108611  | 2.912665  |
|   |           |           |           | 1           | -2.514714 | 0.202414  | 4.357150  |
|   |           |           |           | 6           | 4.433362  | -2.785851 | 2.938577  |
|   |           |           |           | 6           | 3.879338  | -2.139641 | 1.856142  |
|   |           |           |           | 6           | 3.018680  | -1.021872 | 2.029793  |
|   |           |           |           | 6           | 2.722551  | -0.601369 | 3.364907  |
|   |           |           |           | 6           | 3.295797  | -1.296703 | 4.459356  |
|   |           |           |           | 6           | 4.140426  | -2.364153 | 4.255264  |
|   |           |           |           | 1           | 5.094326  | -3.633191 | 2.779015  |
|   |           |           |           | 1           | 4.100487  | -2.482086 | 0.852745  |
|   |           |           |           | 6           | 2.433685  | -0.320769 | 0.921106  |
|   |           |           |           | 6           | 1.834345  | 0.487270  | 3.556212  |
|   |           |           |           | 1           | 3.053185  | -0.967316 | 5.466650  |
|   |           |           |           | 1           | 4.577956  | -2.886219 | 5.101500  |
|   |           |           |           | 6           | 1.314188  | 1.167076  | 2.485999  |
|   |           |           |           | 6           | 1.644315  | 0.802319  | 1.149042  |
|   |           |           |           | 1           | 1.562066  | 0.773105  | 4.569211  |

|    |           |           |           |             |           |           |           |
|----|-----------|-----------|-----------|-------------|-----------|-----------|-----------|
| 6  | 6.337371  | -0.409152 | -2.469799 | 6           | 1.166684  | -4.118618 | 2.555576  |
| 6  | 5.308238  | -1.087890 | -3.080544 | 1           | 1.444145  | -3.909270 | 0.432637  |
| 6  | 4.064649  | -1.269953 | -2.422188 | 6           | -0.248866 | -2.466225 | 3.606147  |
| 6  | 3.880788  | -0.734435 | -1.108672 | 1           | -1.073335 | -0.972434 | 2.278231  |
| 6  | 4.966058  | -0.041371 | -0.505643 | 6           | 0.569922  | -3.590901 | 3.703666  |
| 6  | 6.162149  | 0.115743  | -1.167398 | 1           | 1.822566  | -4.980975 | 2.630578  |
| 1  | 3.131849  | -2.388740 | -4.019609 | 1           | -0.699274 | -2.038444 | 4.497861  |
| 1  | 7.284893  | -0.274193 | -2.983675 | 1           | 0.757734  | -4.048349 | 4.670833  |
| 1  | 5.429870  | -1.494363 | -4.081429 | 6           | -1.044455 | -2.778158 | -1.417743 |
| 6  | 2.989930  | -1.962338 | -3.029557 | 6           | -1.552427 | -2.344365 | -2.654393 |
| 6  | 2.614980  | -0.875261 | -0.457683 | 6           | -1.325379 | -4.081427 | -0.996015 |
| 1  | 4.834163  | 0.373613  | 0.486845  | 6           | -2.299437 | -3.200061 | -3.459527 |
| 1  | 6.977169  | 0.652276  | -0.689787 | 1           | -1.382527 | -1.314857 | -2.958505 |
| 6  | 1.563453  | -1.533484 | -1.101032 | 6           | -2.095857 | -4.933462 | -1.793354 |
| 6  | 1.781490  | -2.089960 | -2.389789 | 1           | -0.964686 | -4.431268 | -0.035840 |
| 1  | 0.611569  | 1.973938  | 2.655033  | 6           | -2.579761 | -4.500187 | -3.026463 |
| 1  | 0.974890  | -2.619468 | -2.881743 | 1           | -2.683945 | -2.846862 | -4.412439 |
| 15 | 0.713761  | 1.652016  | -0.198192 | 1           | -2.318434 | -5.937739 | -1.443151 |
| 15 | -0.155679 | -1.528467 | -0.384711 | 1           | -3.178210 | -5.164224 | -3.643898 |
| 6  | 1.847147  | 1.761194  | -1.647397 | 1           | -1.486006 | 2.430844  | 4.757202  |
| 6  | 3.090186  | 2.404068  | -1.574674 | 6           | -5.001569 | -0.248179 | -0.342486 |
| 6  | 1.419451  | 1.236612  | -2.872117 | 6           | -6.200562 | -0.093206 | 0.373902  |
| 6  | 3.902915  | 2.494211  | -2.701470 | 6           | -4.773025 | -1.476101 | -0.985544 |
| 1  | 3.426269  | 2.825065  | -0.632149 | 6           | -7.127508 | -1.133104 | 0.465878  |
| 6  | 2.231511  | 1.331251  | -4.002565 | 1           | -6.413416 | 0.851676  | 0.870608  |
| 1  | 0.459019  | 0.731285  | -2.916833 | 6           | -5.700880 | -2.514549 | -0.909258 |
| 6  | 3.476247  | 1.955110  | -3.917572 | 1           | -3.853588 | -1.629544 | -1.540258 |
| 1  | 4.874917  | 2.973068  | -2.629289 | 6           | -6.878186 | -2.347369 | -0.176870 |
| 1  | 1.895978  | 0.906796  | -4.944708 | 1           | -8.042941 | -0.995829 | 1.035711  |
| 1  | 4.114775  | 2.020268  | -4.793930 | 1           | -5.494995 | -3.454929 | -1.413920 |
| 6  | 0.740831  | 3.435329  | 0.277801  | 1           | -7.598902 | -3.158089 | -0.107852 |
| 6  | -0.134420 | 4.270090  | -0.431929 | 1           | -2.422761 | -0.673715 | -0.292667 |
| 6  | 1.601600  | 4.011106  | 1.220095  |             |           |           |           |
| 6  | -0.174371 | 5.640614  | -0.187374 | <b>TS6b</b> |           |           |           |
| 1  | -0.789550 | 3.833775  | -1.179785 | 45          | -0.193507 | -0.341808 | -0.953254 |
| 6  | 1.556703  | 5.384013  | 1.474392  | 15          | -1.996997 | 0.558860  | 0.772877  |
| 1  | 2.305088  | 3.391410  | 1.765165  | 6           | -3.472910 | -0.547756 | 0.624886  |
| 6  | 0.665719  | 6.201146  | 0.778307  | 6           | -4.172965 | -0.444818 | -0.589041 |
| 1  | -0.863545 | 6.269147  | -0.744647 | 6           | -3.953041 | -1.415229 | 1.610798  |
| 1  | 2.224343  | 5.814042  | 2.216174  | 6           | -5.320580 | -1.199993 | -0.809824 |
| 1  | 0.630819  | 7.267969  | 0.980082  | 1           | -3.803334 | 0.219100  | -1.364639 |
| 6  | 0.122304  | -2.390805 | 1.213664  | 6           | -5.097619 | -2.183245 | 1.379548  |
| 6  | 0.948973  | -3.519033 | 1.317405  | 1           | -3.460408 | -1.485136 | 2.572553  |
| 6  | -0.471384 | -1.868266 | 2.365970  | 6           | -5.782222 | -2.080375 | 0.170024  |



|    |           |           |           |    |           |           |           |
|----|-----------|-----------|-----------|----|-----------|-----------|-----------|
| 1  | -5.837353 | -1.120640 | -1.760884 | 1  | 1.432146  | -2.751369 | -3.883930 |
| 1  | -5.455649 | -2.855123 | 2.155145  | 1  | 0.285960  | -0.581864 | -3.469462 |
| 1  | -6.669566 | -2.680713 | -0.009241 | 1  | 1.841376  | -0.660580 | -2.648607 |
| 6  | -2.945552 | 2.148698  | 0.714296  | 1  | 0.943255  | -4.308823 | -1.584695 |
| 6  | -3.944504 | 2.375013  | 1.679448  | 1  | 2.537397  | -3.725027 | -2.053894 |
| 6  | -2.780063 | 3.071323  | -0.319460 | 14 | 1.575538  | -2.288058 | -0.279181 |
| 6  | -4.736101 | 3.517301  | 1.624169  | 6  | 1.820956  | -3.322796 | 1.301385  |
| 1  | -4.105958 | 1.649979  | 2.471101  | 6  | 1.476453  | -2.905217 | 2.596342  |
| 6  | -3.588258 | 4.209874  | -0.381880 | 6  | 2.450297  | -4.572765 | 1.172643  |
| 1  | -2.039094 | 2.894379  | -1.083927 | 6  | 1.745992  | -3.693035 | 3.716090  |
| 6  | -4.559004 | 4.440968  | 0.588479  | 1  | 0.992631  | -1.948032 | 2.744422  |
| 1  | -5.499800 | 3.681316  | 2.379603  | 6  | 2.718072  | -5.371210 | 2.286482  |
| 1  | -3.442409 | 4.916425  | -1.192956 | 1  | 2.741246  | -4.931056 | 0.188624  |
| 1  | -5.183188 | 5.329233  | 0.539098  | 6  | 2.367647  | -4.933271 | 3.564276  |
| 6  | -1.527577 | 0.481831  | 2.554236  | 1  | 1.474863  | -3.335244 | 4.706712  |
| 6  | -1.222047 | -0.747539 | 3.159738  | 1  | 3.201867  | -6.335721 | 2.155631  |
| 6  | -1.354556 | 1.651115  | 3.311764  | 15 | 1.301877  | 1.538452  | -0.524763 |
| 6  | -0.797015 | -0.811467 | 4.486761  | 6  | 2.597987  | 1.764807  | -1.809676 |
| 1  | -1.315439 | -1.665135 | 2.593339  | 6  | 3.965400  | 1.854518  | -1.531021 |
| 6  | -0.910731 | 1.589885  | 4.632397  | 6  | 2.173040  | 1.823136  | -3.149721 |
| 1  | -1.579876 | 2.614294  | 2.870300  | 6  | 4.885070  | 2.052069  | -2.561592 |
| 6  | -0.640016 | 0.358957  | 5.230315  | 1  | 4.328536  | 1.729043  | -0.519738 |
| 1  | -0.584947 | -1.779339 | 4.932510  | 6  | 3.094931  | 2.020590  | -4.175507 |
| 1  | -0.782028 | 2.509629  | 5.195923  | 1  | 1.121992  | 1.690507  | -3.385914 |
| 1  | -0.305051 | 0.311893  | 6.262484  | 6  | 4.455000  | 2.146858  | -3.883675 |
| 17 | -1.370344 | 1.071908  | -2.617980 | 1  | 5.943467  | 2.109933  | -2.324276 |
| 6  | -1.306538 | -2.057927 | -1.035528 | 1  | 2.748548  | 2.066282  | -5.204272 |
| 6  | -2.377989 | -2.664236 | -1.777365 | 1  | 5.173917  | 2.300537  | -4.683785 |
| 6  | -2.986117 | -3.842789 | -1.301525 | 6  | 0.556691  | 3.237026  | -0.448337 |
| 6  | -2.821324 | -2.102071 | -2.988431 | 6  | 0.189557  | 3.768452  | 0.798155  |
| 6  | -4.031506 | -4.426403 | -2.007178 | 6  | 0.333731  | 4.010255  | -1.595234 |
| 1  | -2.640945 | -4.275922 | -0.367797 | 6  | -0.366975 | 5.041837  | 0.897931  |
| 6  | -3.855816 | -2.702853 | -3.699352 | 1  | 0.349426  | 3.190894  | 1.700073  |
| 1  | -2.354164 | -1.187596 | -3.335661 | 6  | -0.225185 | 5.284621  | -1.493982 |
| 6  | -4.467963 | -3.859159 | -3.209004 | 1  | 0.600313  | 3.629271  | -2.571368 |
| 1  | -4.506764 | -5.325429 | -1.624970 | 6  | -0.573982 | 5.807644  | -0.248432 |
| 1  | -4.191996 | -2.263508 | -4.634331 | 1  | -0.644934 | 5.430784  | 1.873565  |
| 1  | -5.281033 | -4.321279 | -3.762271 | 1  | -0.383670 | 5.869536  | -2.395787 |
| 6  | -0.514755 | -2.271579 | -0.013487 | 1  | -1.008318 | 6.800428  | -0.173070 |
| 1  | -0.634605 | -2.759762 | 0.944276  | 6  | 2.166874  | 1.579962  | 1.097121  |
| 6  | 0.877994  | -2.588700 | -2.945513 | 6  | 3.085470  | 2.587793  | 1.435113  |
| 6  | 0.839034  | -1.084621 | -2.676621 | 6  | 1.796146  | 0.655279  | 2.072911  |
| 6  | 1.520897  | -3.404027 | -1.801407 | 6  | 3.658754  | 2.621463  | 2.703506  |
| 1  | -0.133265 | -2.954408 | -3.137295 | 1  | 3.339388  | 3.354033  | 0.710586  |

|   |          |           |           |    |           |           |           |
|---|----------|-----------|-----------|----|-----------|-----------|-----------|
| 6 | 2.351441 | 0.697035  | 3.352403  | 6  | -3.022564 | -1.383320 | 2.321870  |
| 1 | 1.066004 | -0.100973 | 1.817755  | 6  | -0.721440 | -1.333667 | 3.901471  |
| 6 | 3.295206 | 1.672692  | 3.665049  | 6  | -0.619838 | -1.295776 | 2.511637  |
| 1 | 4.380156 | 3.396095  | 2.948168  | 6  | -1.766194 | -1.345280 | 1.706539  |
| 1 | 2.046377 | -0.033906 | 4.093121  | 1  | 0.182860  | -1.294268 | 4.500108  |
| 1 | 3.738537 | 1.706084  | 4.656423  | 6  | -3.794627 | 1.982614  | 3.091053  |
| 1 | 2.578171 | -5.551761 | 4.432498  | 6  | -2.450137 | 1.795215  | 3.418263  |
| 6 | 3.312286 | -1.468138 | -0.358099 | 1  | -5.208848 | 2.260305  | 1.487276  |
| 6 | 4.012528 | -1.132193 | 0.814240  | 6  | -4.163190 | 2.138372  | 1.756114  |
| 6 | 4.039632 | -1.433164 | -1.562010 | 6  | -1.483153 | 1.769759  | 2.417640  |
| 6 | 5.349564 | -0.738548 | 0.787377  | 6  | -1.837194 | 1.986737  | 1.074153  |
| 1 | 3.517897 | -1.201501 | 1.773672  | 6  | -3.191132 | 2.148726  | 0.753839  |
| 6 | 5.386222 | -1.069111 | -1.596237 | 1  | 0.352975  | -1.210203 | 2.045318  |
| 1 | 3.564981 | -1.707682 | -2.496699 | 1  | -3.494102 | 2.281516  | -0.277272 |
| 6 | 6.045605 | -0.708747 | -0.422324 | 15 | -1.491532 | -1.500386 | -0.111254 |
| 1 | 5.849399 | -0.475475 | 1.715859  | 15 | -0.512892 | 1.907618  | -0.195130 |
| 1 | 5.912703 | -1.054266 | -2.546382 | 6  | -3.144643 | -1.176790 | -0.868179 |
| 1 | 7.092803 | -0.418487 | -0.447164 | 6  | -4.264627 | -1.984062 | -0.604302 |

**TS7b**

|    |           |           |           |   |           |           |           |
|----|-----------|-----------|-----------|---|-----------|-----------|-----------|
| 45 | 0.211417  | -0.294426 | -0.979632 | 6 | -3.285015 | -0.114652 | -1.764362 |
| 17 | 2.310859  | 0.684826  | -1.780710 | 6 | -5.497325 | -1.696531 | -1.187681 |
| 6  | 1.432625  | -3.108521 | -1.717048 | 1 | -4.167573 | -2.850547 | 0.041293  |
| 6  | 0.617748  | -1.917688 | -2.269637 | 6 | -4.515642 | 0.173560  | -2.356388 |
| 6  | 2.070727  | -2.809853 | -0.347149 | 1 | -2.421671 | 0.485536  | -2.007807 |
| 1  | 0.806285  | -4.001098 | -1.626155 | 6 | -5.628681 | -0.611714 | -2.059983 |
| 1  | 2.225967  | -3.370609 | -2.431642 | 1 | -6.355216 | -2.326571 | -0.969557 |
| 1  | -0.322908 | -2.264301 | -2.711031 | 1 | -4.592460 | 1.007633  | -3.048506 |
| 1  | 1.177091  | -1.427343 | -3.076443 | 1 | -6.590485 | -0.393765 | -2.515913 |
| 1  | 1.311072  | -2.934536 | 0.430483  | 6 | -1.462931 | -3.346573 | -0.267424 |
| 1  | 2.892993  | -3.503013 | -0.117226 | 6 | -1.895925 | -3.949170 | -1.459441 |
| 14 | 2.658161  | -1.013704 | -0.230348 | 6 | -0.959329 | -4.163275 | 0.752884  |
| 6  | 2.648277  | -0.311720 | 1.511107  | 6 | -1.807223 | -5.328924 | -1.632660 |
| 6  | 2.540962  | 1.056505  | 1.799253  | 1 | -2.310743 | -3.337992 | -2.253590 |
| 6  | 2.805116  | -1.203956 | 2.587286  | 6 | -0.866635 | -5.544437 | 0.577725  |
| 6  | 2.556467  | 1.519688  | 3.115954  | 1 | -0.642465 | -3.723563 | 1.692058  |
| 1  | 2.442499  | 1.768176  | 0.989564  | 6 | -1.284097 | -6.131577 | -0.616803 |
| 6  | 2.831133  | -0.745597 | 3.905661  | 1 | -2.144275 | -5.776208 | -2.563610 |
| 1  | 2.904484  | -2.270378 | 2.397447  | 1 | -0.471018 | -6.160959 | 1.380131  |
| 6  | 2.695647  | 0.618579  | 4.173608  | 1 | -1.210812 | -7.206855 | -0.752783 |
| 1  | 2.461247  | 2.584406  | 3.307474  | 6 | 0.605292  | 3.318640  | 0.276929  |
| 1  | 2.957821  | -1.452285 | 4.722066  | 6 | 0.569949  | 3.989019  | 1.506128  |
| 6  | -3.124689 | -1.410387 | 3.712645  | 6 | 1.547288  | 3.731811  | -0.681748 |
| 6  | -1.977099 | -1.401721 | 4.506439  | 6 | 1.474845  | 5.016350  | 1.784190  |
|    |           |           |           | 1 | -0.168246 | 3.725711  | 2.252360  |
|    |           |           |           | 6 | 2.453512  | 4.751368  | -0.400064 |

|             |           |           |           |    |           |           |           |
|-------------|-----------|-----------|-----------|----|-----------|-----------|-----------|
| 1           | 1.570772  | 3.256296  | -1.654041 | 1  | -4.093023 | -0.607458 | -2.054056 |
| 6           | 2.428444  | 5.393085  | 0.839770  | 6  | -3.457804 | -3.934113 | -2.387571 |
| 1           | 1.425263  | 5.524806  | 2.743535  | 1  | -1.861394 | -4.994472 | -1.398020 |
| 1           | 3.177851  | 5.045728  | -1.154241 | 1  | -4.931401 | -2.612528 | -3.247696 |
| 1           | 3.135886  | 6.187235  | 1.060805  | 1  | -3.821789 | -4.811047 | -2.915717 |
| 6           | -1.251553 | 2.739016  | -1.675899 | 6  | -2.176614 | 1.166986  | -1.249404 |
| 6           | -1.044984 | 2.190135  | -2.948642 | 6  | -3.010675 | 2.246427  | -0.937809 |
| 6           | -1.941557 | 3.955763  | -1.566229 | 6  | -1.444206 | 1.192939  | -2.448180 |
| 6           | -1.547403 | 2.825021  | -4.087025 | 6  | -3.114517 | 3.331547  | -1.811766 |
| 1           | -0.491465 | 1.258682  | -3.041455 | 1  | -3.580763 | 2.240741  | -0.014778 |
| 6           | -2.449627 | 4.585722  | -2.700225 | 6  | -1.551111 | 2.274248  | -3.318352 |
| 1           | -2.077223 | 4.410038  | -0.589593 | 1  | -0.785843 | 0.363380  | -2.695261 |
| 6           | -2.257353 | 4.019104  | -3.963853 | 6  | -2.386841 | 3.349236  | -3.001456 |
| 1           | -1.379673 | 2.385126  | -5.066062 | 1  | -3.768876 | 4.162032  | -1.560735 |
| 1           | -2.989120 | 5.523551  | -2.600395 | 1  | -0.978308 | 2.281393  | -4.241403 |
| 1           | -2.651005 | 4.513723  | -4.847458 | 1  | -2.468859 | 4.194256  | -3.679228 |
| 1           | 2.709003  | 0.976907  | 5.199493  | 6  | -3.068922 | 0.010402  | 1.251949  |
| 6           | 4.495682  | -1.067547 | -0.706995 | 6  | -4.287211 | -0.676475 | 1.330048  |
| 6           | 4.998797  | -2.060351 | -1.563738 | 6  | -2.735798 | 0.921892  | 2.267318  |
| 6           | 5.400142  | -0.111433 | -0.213313 | 6  | -5.159617 | -0.445272 | 2.395303  |
| 6           | 6.348402  | -2.097110 | -1.919171 | 1  | -4.554339 | -1.392505 | 0.560627  |
| 1           | 4.330357  | -2.817228 | -1.964906 | 6  | -3.613154 | 1.161009  | 3.323182  |
| 6           | 6.750258  | -0.143866 | -0.560000 | 1  | -1.781918 | 1.436101  | 2.220766  |
| 1           | 5.044024  | 0.666387  | 0.457342  | 6  | -4.828395 | 0.475200  | 3.390115  |
| 6           | 7.228268  | -1.137780 | -1.416955 | 1  | -6.100389 | -0.986379 | 2.445671  |
| 1           | 6.712510  | -2.874660 | -2.586026 | 1  | -3.343967 | 1.872467  | 4.098973  |
| 1           | 7.430757  | 0.604166  | -0.160905 | 1  | -5.509575 | 0.652932  | 4.217423  |
| 1           | 8.280194  | -1.165171 | -1.689079 | 17 | 1.715774  | -2.180195 | -0.488136 |
| 1           | -4.550415 | 1.985790  | 3.871446  | 6  | 1.305337  | -0.856880 | 3.163179  |
| 1           | -2.155748 | 1.633353  | 4.449944  | 6  | 0.185350  | -1.118094 | 2.152956  |
| 1           | -0.449731 | 1.567288  | 2.679590  | 6  | 2.717883  | -1.027733 | 2.575473  |
| 1           | -4.107497 | -1.430231 | 4.175630  | 1  | 1.209581  | 0.153703  | 3.577475  |
| 1           | -2.062446 | -1.430066 | 5.589443  | 1  | 1.167804  | -1.540419 | 4.015906  |
| 1           | -3.925666 | -1.369044 | 1.725597  | 1  | -0.779190 | -0.817410 | 2.569940  |
|             |           |           |           | 1  | 0.144702  | -2.180505 | 1.889276  |
|             |           |           |           | 1  | 3.486235  | -0.614892 | 3.240516  |
| <b>TS8b</b> |           |           |           | 1  | 2.951066  | -2.090915 | 2.435775  |
| 45          | 0.431029  | -0.173914 | 0.330506  | 1  | 2.951066  | -2.090915 | 2.435775  |
| 15          | -1.858742 | -0.234115 | -0.106541 | 14 | 2.797574  | -0.248032 | 0.866637  |
| 6           | -2.515459 | -1.671362 | -1.034716 | 6  | 2.040626  | 1.428474  | 0.590559  |
| 6           | -1.885135 | -2.911101 | -0.861176 | 6  | 2.267921  | 2.037930  | -0.699227 |
| 6           | -3.613180 | -1.570078 | -1.903157 | 6  | 0.864539  | 1.880631  | 1.294098  |
| 6           | -2.359815 | -4.038873 | -1.532672 | 6  | 1.478758  | 3.060098  | -1.173899 |
| 1           | -1.008517 | -2.981346 | -0.225264 | 1  | 3.102704  | 1.688763  | -1.299414 |
| 6           | -4.082080 | -2.697777 | -2.575409 | 6  | 0.096283  | 2.978010  | 0.795382  |

|   |           |           |           |   |          |           |           |
|---|-----------|-----------|-----------|---|----------|-----------|-----------|
| 1 | 0.729068  | 1.622297  | 2.337485  | 6 | 3.326545 | -1.125435 | 4.589970  |
| 6 | 0.379539  | 3.547155  | -0.419804 | 6 | 3.689750 | -2.451822 | 4.562748  |
| 1 | 1.706167  | 3.510297  | -2.136665 | 1 | 3.936117 | -4.215725 | 3.324864  |
| 1 | -0.743074 | 3.337155  | 1.384598  | 1 | 3.176338 | -3.120477 | 1.262854  |
| 1 | -0.238338 | 4.346730  | -0.814531 | 6 | 2.380029 | -0.527393 | 0.992232  |
| 6 | 4.469889  | -0.342760 | 0.029650  | 6 | 2.581058 | 0.916577  | 3.403019  |
| 6 | 5.298469  | 0.794230  | 0.099562  | 1 | 3.362245 | -0.559988 | 5.517702  |
| 6 | 4.991433  | -1.505016 | -0.563303 | 1 | 4.014958 | -2.949438 | 5.471928  |
| 6 | 6.596895  | 0.773545  | -0.410195 | 6 | 2.198019 | 1.546816  | 2.244996  |
| 1 | 4.920658  | 1.707949  | 0.551086  | 6 | 2.075630 | 0.834038  | 1.021732  |
| 6 | 6.289570  | -1.527734 | -1.073287 | 1 | 2.655616 | 1.478318  | 4.330823  |
| 1 | 4.370255  | -2.390602 | -0.636051 | 6 | 5.888986 | -2.314535 | -2.329718 |
| 6 | 7.094460  | -0.389423 | -0.999662 | 6 | 4.671688 | -2.662671 | -2.867417 |
| 1 | 7.216858  | 1.664004  | -0.349482 | 6 | 3.462177 | -2.349442 | -2.195142 |
| 1 | 6.672048  | -2.435284 | -1.532616 | 6 | 3.506486 | -1.652421 | -0.947682 |
| 1 | 8.104514  | -0.408447 | -1.400251 | 6 | 4.782601 | -1.301640 | -0.425397 |

**TS7a**

|    |           |           |           |    |           |           |           |
|----|-----------|-----------|-----------|----|-----------|-----------|-----------|
| 45 | -0.989794 | 1.033341  | -0.715952 | 1  | 6.809571  | -2.562431 | -2.850417 |
| 6  | -2.788788 | 3.032629  | -2.507064 | 1  | 4.614804  | -3.187315 | -3.817832 |
| 6  | -1.384504 | 2.877080  | -1.912305 | 6  | 2.200216  | -2.706420 | -2.726141 |
| 6  | -3.857184 | 2.676571  | -1.464926 | 6  | 2.281776  | -1.311603 | -0.279046 |
| 1  | -2.928986 | 4.061340  | -2.873643 | 1  | 4.837908  | -0.763561 | 0.512669  |
| 1  | -2.893021 | 2.374762  | -3.381397 | 1  | 6.902089  | -1.351403 | -0.671901 |
| 1  | -1.267629 | 3.532886  | -1.038993 | 6  | 1.054455  | -1.692208 | -0.823916 |
| 1  | -0.597900 | 3.166277  | -2.617810 | 6  | 1.041555  | -2.397800 | -2.059451 |
| 1  | -3.911467 | 3.481864  | -0.719000 | 1  | 1.988693  | 2.608275  | 2.267614  |
| 1  | -4.855862 | 2.609645  | -1.912181 | 1  | 0.093918  | -2.697019 | -2.487574 |
| 14 | -3.341290 | 1.090697  | -0.508307 | 15 | 1.299683  | 1.641612  | -0.456525 |
| 6  | -3.386132 | 1.543953  | 1.346352  | 15 | -0.586582 | -1.149116 | -0.108943 |
| 6  | -2.603653 | 2.645988  | 1.752738  | 6  | 2.479112  | 1.331637  | -1.819411 |
| 6  | -4.019903 | 0.807647  | 2.362686  | 6  | 3.860931  | 1.517640  | -1.672463 |
| 6  | -2.420780 | 2.967523  | 3.098607  | 6  | 1.972513  | 0.871560  | -3.041279 |
| 1  | -2.134191 | 3.267695  | 0.997021  | 6  | 4.722323  | 1.245570  | -2.732454 |
| 6  | -3.850570 | 1.126880  | 3.711080  | 1  | 4.260576  | 1.852944  | -0.719791 |
| 1  | -4.661060 | -0.026999 | 2.101236  | 6  | 2.837329  | 0.596478  | -4.100277 |
| 6  | -3.036200 | 2.197248  | 4.087473  | 1  | 0.904122  | 0.705820  | -3.137710 |
| 1  | -1.804755 | 3.820401  | 3.375331  | 6  | 4.211757  | 0.780266  | -3.946484 |
| 1  | -4.354237 | 0.535594  | 4.471767  | 1  | 5.793132  | 1.371530  | -2.604417 |
| 6  | 3.644308  | -3.169433 | 3.344257  | 1  | 2.438123  | 0.222870  | -5.038918 |
| 6  | 3.222413  | -2.557029 | 2.186785  | 1  | 4.887042  | 0.552072  | -4.765990 |
| 6  | 2.838413  | -1.187266 | 2.178242  | 6  | 1.459112  | 3.445861  | -0.131604 |
| 6  | 2.909437  | -0.460159 | 3.407770  | 6  | 0.631385  | 4.012315  | 0.854134  |
|    |           |           |           | 6  | 2.258726  | 4.297263  | -0.903943 |

|   |           |           |           |             |           |           |           |
|---|-----------|-----------|-----------|-------------|-----------|-----------|-----------|
| 6 | 0.629263  | 5.385557  | 1.084369  | <b>TS8a</b> |           |           |           |
| 1 | -0.020552 | 3.370914  | 1.437526  | 45          | 0.382722  | 0.460787  | 0.108510  |
| 6 | 2.245004  | 5.676737  | -0.682415 | 6           | 3.783052  | 3.616225  | -1.730683 |
| 1 | 2.888713  | 3.888256  | -1.685190 | 6           | 4.644402  | 3.468927  | -2.989839 |
| 6 | 1.437357  | 6.224924  | 0.312949  | 6           | 2.638152  | 2.591443  | -1.683027 |
| 1 | -0.014006 | 5.801364  | 1.855121  | 1           | 4.415760  | 3.501633  | -0.843361 |
| 1 | 2.869376  | 6.322346  | -1.293880 | 1           | 3.381737  | 4.636513  | -1.676882 |
| 1 | 1.429122  | 7.297861  | 0.482082  | 1           | 5.087776  | 2.466142  | -3.040937 |
| 6 | -0.446780 | -1.602879 | 1.664816  | 1           | 5.462250  | 4.199707  | -3.012482 |
| 6 | 0.078643  | -2.824713 | 2.111154  | 1           | 1.994488  | 2.723333  | -2.563814 |
| 6 | -0.847620 | -0.649715 | 2.610629  | 1           | 3.055357  | 1.580063  | -1.769474 |
| 6 | 0.177511  | -3.096027 | 3.473663  | 14          | 1.525028  | 2.578890  | -0.125011 |
| 1 | 0.449966  | -3.547860 | 1.391843  | 6           | 2.692835  | 2.841865  | 1.367025  |
| 6 | -0.737607 | -0.917358 | 3.975139  | 6           | 3.931076  | 2.171272  | 1.424349  |
| 1 | -1.234857 | 0.305911  | 2.277417  | 6           | 2.364562  | 3.664679  | 2.458397  |
| 6 | -0.227970 | -2.141210 | 4.408582  | 6           | 4.788379  | 2.302727  | 2.516177  |
| 1 | 0.603936  | -4.037431 | 3.806052  | 1           | 4.221627  | 1.520868  | 0.607173  |
| 1 | -1.049452 | -0.162966 | 4.690521  | 6           | 3.214242  | 3.796855  | 3.559919  |
| 1 | -0.132673 | -2.348277 | 5.470724  | 1           | 1.436243  | 4.227335  | 2.446639  |
| 6 | -1.710906 | -2.414326 | -0.846018 | 6           | 4.429683  | 3.113274  | 3.595246  |
| 6 | -2.274345 | -2.111981 | -2.095811 | 1           | 5.735725  | 1.769294  | 2.525039  |
| 6 | -2.007446 | -3.648017 | -0.255421 | 1           | 2.928562  | 4.442952  | 4.386867  |
| 6 | -3.086250 | -3.031915 | -2.753671 | 6           | -6.916775 | -0.495400 | 1.284641  |
| 1 | -2.084898 | -1.134686 | -2.529538 | 6           | -5.723210 | -0.738807 | 0.644423  |
| 6 | -2.832381 | -4.565025 | -0.908816 | 6           | -4.541997 | -1.031082 | 1.380594  |
| 1 | -1.616566 | -3.893366 | 0.724180  | 6           | -4.628169 | -1.069883 | 2.807941  |
| 6 | -3.367415 | -4.263648 | -2.160741 | 6           | -5.869420 | -0.798758 | 3.439637  |
| 1 | -3.527510 | -2.772395 | -3.711097 | 6           | -6.993170 | -0.518434 | 2.696931  |
| 1 | -3.061667 | -5.514246 | -0.431890 | 1           | -7.806588 | -0.276217 | 0.701288  |
| 1 | -4.017417 | -4.974719 | -2.662587 | 1           | -5.672442 | -0.706212 | -0.437358 |
| 1 | -2.898262 | 2.439483  | 5.137955  | 6           | -3.283276 | -1.274439 | 0.741511  |
| 6 | -4.584663 | -0.294453 | -0.840311 | 6           | -3.466692 | -1.391786 | 3.551365  |
| 6 | -5.447103 | -0.233790 | -1.948667 | 1           | -5.915012 | -0.823684 | 4.525441  |
| 6 | -4.653780 | -1.448509 | -0.036691 | 1           | -7.939709 | -0.318037 | 3.190682  |
| 6 | -6.345550 | -1.263577 | -2.235314 | 6           | -2.275961 | -1.655622 | 2.921100  |
| 1 | -5.419196 | 0.632313  | -2.604512 | 6           | -2.160599 | -1.593522 | 1.505577  |
| 6 | -5.557521 | -2.473804 | -0.305297 | 1           | -3.532831 | -1.439808 | 4.635457  |
| 1 | -3.969598 | -1.564505 | 0.797741  | 6           | -4.782802 | -4.599920 | -2.880705 |
| 6 | -6.409444 | -2.384540 | -1.407974 | 6           | -4.190839 | -3.565862 | -3.567367 |
| 1 | -6.999559 | -1.186615 | -3.100596 | 6           | -3.685463 | -2.431657 | -2.880555 |
| 1 | -5.581321 | -3.352902 | 0.332500  | 6           | -3.775692 | -2.369412 | -1.455229 |
| 1 | -7.110029 | -3.186760 | -1.624828 | 6           | -4.395651 | -3.456561 | -0.778024 |
| 1 | -1.179922 | 1.311139  | -2.240781 | 6           | -4.889188 | -4.537831 | -1.471584 |
|   |           |           |           | 1           | -3.037971 | -1.379445 | -4.654507 |

|    |           |           |           |   |           |           |           |
|----|-----------|-----------|-----------|---|-----------|-----------|-----------|
| 1  | -5.169744 | -5.462609 | -3.415370 | 1 | -5.301021 | 2.829542  | 3.549622  |
| 1  | -4.103040 | -3.597270 | -4.650271 | 6 | -1.721625 | 2.502700  | -1.926479 |
| 6  | -3.095263 | -1.346794 | -3.569492 | 6 | -0.736093 | 2.355488  | -2.916754 |
| 6  | -3.222215 | -1.244617 | -0.754682 | 6 | -2.582483 | 3.601228  | -1.985041 |
| 1  | -4.472174 | -3.430892 | 0.301698  | 6 | -0.646321 | 3.260558  | -3.970562 |
| 1  | -5.358765 | -5.354786 | -0.931057 | 1 | -0.026668 | 1.534974  | -2.845854 |
| 6  | -2.650357 | -0.190121 | -1.468299 | 6 | -2.479303 | 4.517851  | -3.032735 |
| 6  | -2.611423 | -0.258593 | -2.888409 | 1 | -3.306299 | 3.771498  | -1.198516 |
| 1  | -1.406913 | -1.916250 | 3.512594  | 6 | -1.525781 | 4.343715  | -4.034037 |
| 1  | -2.188992 | 0.563232  | -3.450016 | 1 | 0.121383  | 3.130798  | -4.728049 |
| 15 | -0.486022 | -1.675946 | 0.727257  | 1 | -3.140014 | 5.379442  | -3.053417 |
| 15 | -1.757454 | 1.212508  | -0.621062 | 1 | -1.450185 | 5.060548  | -4.846645 |
| 6  | -0.621839 | -2.918535 | -0.605308 | 1 | 5.094073  | 3.216479  | 4.449419  |
| 6  | -1.302963 | -4.133412 | -0.446854 | 6 | 0.414462  | 4.124076  | -0.150194 |
| 6  | -0.011760 | -2.625449 | -1.832239 | 6 | 0.498933  | 5.102773  | -1.153519 |
| 6  | -1.376324 | -5.039678 | -1.501963 | 6 | -0.547922 | 4.324183  | 0.855587  |
| 1  | -1.793112 | -4.356837 | 0.495991  | 6 | -0.330316 | 6.225828  | -1.150246 |
| 6  | -0.089569 | -3.532708 | -2.888457 | 1 | 1.210933  | 4.983082  | -1.963915 |
| 1  | 0.525638  | -1.688405 | -1.943858 | 6 | -1.386343 | 5.438393  | 0.867035  |
| 6  | -0.773827 | -4.737837 | -2.725328 | 1 | -0.654119 | 3.586071  | 1.642792  |
| 1  | -1.922986 | -5.969363 | -1.378087 | 6 | -1.276943 | 6.399147  | -0.139730 |
| 1  | 0.382758  | -3.296291 | -3.837550 | 1 | -0.243926 | 6.961820  | -1.945836 |
| 1  | -0.841944 | -5.441101 | -3.550362 | 1 | -2.125215 | 5.550569  | 1.656832  |
| 6  | 0.584848  | -2.472890 | 1.991235  | 1 | -1.926449 | 7.270835  | -0.140387 |
| 6  | 1.038004  | -1.688028 | 3.065468  | 1 | 4.044011  | 3.608295  | -3.898239 |
| 6  | 1.057028  | -3.784368 | 1.868980  | 6 | 3.253045  | -0.892824 | 0.038502  |
| 6  | 1.915325  | -2.212909 | 4.009996  | 6 | 2.158864  | -0.329725 | 0.117019  |
| 1  | 0.719083  | -0.652672 | 3.146027  | 1 | 1.488602  | 0.395866  | 1.257256  |
| 6  | 1.953295  | -4.303791 | 2.806186  | 6 | 5.987052  | -1.272422 | 1.258497  |
| 1  | 0.745385  | -4.399019 | 1.033089  | 1 | 6.322363  | -0.228765 | 1.151055  |
| 6  | 2.378348  | -3.524900 | 3.881242  | 6 | 5.555895  | -0.669897 | -1.790889 |
| 1  | 2.259187  | -1.589271 | 4.829901  | 1 | 5.407222  | 0.382594  | -1.500249 |
| 1  | 2.319955  | -5.319770 | 2.689146  | 6 | 4.676149  | -3.505697 | -0.524814 |
| 1  | 3.078015  | -3.929215 | 4.607097  | 1 | 4.667224  | -3.920862 | 0.495925  |
| 6  | -2.915627 | 1.765283  | 0.675137  | 6 | 4.697316  | -0.917038 | -3.042809 |
| 6  | -4.247983 | 2.099065  | 0.400563  | 1 | 4.989559  | -0.243395 | -3.860204 |
| 6  | -2.455959 | 1.800607  | 1.998559  | 1 | 4.813134  | -1.944359 | -3.409719 |
| 6  | -5.098034 | 2.495026  | 1.431814  | 1 | 3.634074  | -0.752800 | -2.835157 |
| 1  | -4.629755 | 2.020466  | -0.612439 | 6 | 7.051452  | -0.854083 | -2.092748 |
| 6  | -3.310509 | 2.183601  | 3.029131  | 1 | 7.357042  | -0.225636 | -2.940746 |
| 1  | -1.431264 | 1.504037  | 2.205290  | 1 | 7.676680  | -0.575304 | -1.237533 |
| 6  | -4.631289 | 2.538011  | 2.746067  | 1 | 7.289864  | -1.890946 | -2.355129 |
| 1  | -6.132607 | 2.740143  | 1.212829  | 6 | 7.235640  | -2.168064 | 1.335080  |
| 1  | -2.948801 | 2.194096  | 4.053086  | 1 | 7.861505  | -1.891046 | 2.194465  |

|             |           |           |           |    |           |           |           |
|-------------|-----------|-----------|-----------|----|-----------|-----------|-----------|
| 1           | 6.955336  | -3.220253 | 1.467347  | 1  | 7.193669  | 1.855020  | -0.638277 |
| 1           | 7.859707  | -2.102696 | 0.437514  | 1  | 5.464007  | 0.319005  | 0.170057  |
| 6           | 5.176189  | -1.378425 | 2.560989  | 6  | 3.068084  | -0.230193 | -1.028597 |
| 1           | 5.807843  | -1.163195 | 3.434623  | 6  | 2.854562  | 0.991952  | -3.567934 |
| 1           | 4.332775  | -0.683433 | 2.569608  | 1  | 4.891001  | 2.631364  | -4.187758 |
| 1           | 4.767783  | -2.387902 | 2.691544  | 1  | 6.913186  | 3.045008  | -2.814327 |
| 6           | 5.833496  | -4.166886 | -1.293634 | 6  | 1.853227  | 0.181320  | -3.099037 |
| 1           | 6.810572  | -3.958273 | -0.846207 | 6  | 1.930917  | -0.424027 | -1.818235 |
| 1           | 5.708990  | -5.258204 | -1.324307 | 1  | 2.769658  | 1.452409  | -4.547261 |
| 1           | 5.864965  | -3.817813 | -2.332469 | 6  | 5.929778  | -4.400693 | -0.305825 |
| 6           | 3.326934  | -3.860001 | -1.172450 | 6  | 5.439935  | -4.096202 | 0.942245  |
| 1           | 2.489371  | -3.449470 | -0.604891 | 6  | 4.600405  | -2.969375 | 1.139910  |
| 1           | 3.254047  | -3.460563 | -2.190976 | 6  | 4.249452  | -2.139839 | 0.029629  |
| 1           | 3.196903  | -4.949563 | -1.239546 | 6  | 4.783812  | -2.481275 | -1.245224 |
| 14          | 4.890871  | -1.620407 | -0.270472 | 6  | 5.597574  | -3.579130 | -1.407889 |
| <b>TS9a</b> |           |           |           | 1  | 4.367523  | -3.258268 | 3.269925  |
| 45          | -0.431657 | 0.255016  | 0.474036  | 1  | 6.570886  | -5.266012 | -0.448111 |
| 6           | -3.711682 | 3.757099  | -2.215127 | 1  | 5.685612  | -4.715042 | 1.801470  |
| 6           | -4.933910 | 3.858693  | -3.134259 | 6  | 4.087755  | -2.645607 | 2.416592  |
| 6           | -3.405431 | 2.307608  | -1.810526 | 6  | 3.346317  | -1.032248 | 0.213117  |
| 1           | -2.845207 | 4.209437  | -2.712456 | 1  | 4.532279  | -1.873544 | -2.104584 |
| 1           | -3.882308 | 4.352750  | -1.309889 | 1  | 5.985136  | -3.818815 | -2.394021 |
| 1           | -4.772332 | 3.301146  | -4.065769 | 6  | 2.823978  | -0.773021 | 1.482823  |
| 1           | -5.155497 | 4.899266  | -3.400408 | 6  | 3.233590  | -1.586606 | 2.578294  |
| 1           | -4.256821 | 1.898560  | -1.254068 | 1  | 0.984996  | 0.001191  | -3.718902 |
| 1           | -3.303437 | 1.671678  | -2.701411 | 1  | 2.841009  | -1.380518 | 3.564475  |
| 14          | -1.879165 | 2.083512  | -0.673053 | 15 | 0.430535  | -1.233929 | -1.107026 |
| 6           | -0.420555 | 2.697860  | -1.725327 | 15 | 1.415085  | 0.404612  | 1.777192  |
| 6           | -0.542121 | 2.902805  | -3.111304 | 6  | 1.041247  | -2.871591 | -0.549004 |
| 6           | 0.780918  | 3.104752  | -1.117926 | 6  | 1.803665  | -3.695730 | -1.389297 |
| 6           | 0.477386  | 3.506910  | -3.851390 | 6  | 0.748257  | -3.304551 | 0.748720  |
| 1           | -1.451014 | 2.606948  | -3.627079 | 6  | 2.264571  | -4.930255 | -0.938032 |
| 6           | 1.801003  | 3.711937  | -1.845705 | 1  | 2.049494  | -3.359427 | -2.392184 |
| 1           | 0.909899  | 2.955466  | -0.056749 | 6  | 1.215187  | -4.537289 | 1.204134  |
| 6           | 1.647712  | 3.922765  | -3.217843 | 1  | 0.167438  | -2.661505 | 1.401668  |
| 1           | 0.350581  | 3.659045  | -4.920502 | 6  | 1.974008  | -5.350812 | 0.361628  |
| 1           | 2.716155  | 4.007480  | -1.341102 | 1  | 2.871390  | -5.551295 | -1.589740 |
| 6           | 6.293743  | 1.698625  | -1.226409 | 1  | 0.993991  | -4.855605 | 2.218844  |
| 6           | 5.319034  | 0.842930  | -0.767301 | 1  | 2.346599  | -6.306880 | 0.718192  |
| 6           | 4.120044  | 0.622373  | -1.504319 | 6  | -0.676512 | -1.671304 | -2.514452 |
| 6           | 3.994476  | 1.264277  | -2.777361 | 6  | -1.328027 | -0.630619 | -3.196549 |
| 6           | 5.016705  | 2.141694  | -3.225363 | 6  | -1.040158 | -2.991681 | -2.811181 |
| 6           | 6.139136  | 2.368171  | -2.464303 | 6  | -2.278325 | -0.899066 | -4.176958 |
|             |           |           |           | 1  | -1.090402 | 0.396446  | -2.952356 |

|   |           |           |           |              |           |           |           |
|---|-----------|-----------|-----------|--------------|-----------|-----------|-----------|
| 6 | -2.012232 | -3.261166 | -3.778005 | 6            | -6.180112 | -1.228623 | -1.080296 |
| 1 | -0.578679 | -3.815194 | -2.280020 | 1            | -6.673632 | -0.298868 | -0.757361 |
| 6 | -2.627791 | -2.219224 | -4.470359 | 6            | -5.385401 | -1.128369 | 1.980401  |
| 1 | -2.763884 | -0.076313 | -4.694394 | 1            | -5.524686 | -0.036906 | 1.922228  |
| 1 | -2.284190 | -4.291903 | -3.988688 | 6            | -4.147965 | -3.362451 | 0.008409  |
| 1 | -3.382185 | -2.430987 | -5.222717 | 1            | -4.200106 | -3.550532 | -1.075559 |
| 6 | 2.152364  | 2.074625  | 1.948961  | 6            | -4.270847 | -1.387064 | 3.011555  |
| 6 | 3.489228  | 2.344411  | 1.649883  | 1            | -4.547015 | -0.983045 | 3.995217  |
| 6 | 1.302710  | 3.130843  | 2.321684  | 1            | -4.090471 | -2.461457 | 3.140777  |
| 6 | 3.971801  | 3.654874  | 1.692156  | 1            | -3.327128 | -0.920971 | 2.708105  |
| 1 | 4.152625  | 1.536686  | 1.373660  | 6            | -6.721192 | -1.739196 | 2.433427  |
| 6 | 1.790053  | 4.432825  | 2.381506  | 1            | -6.985296 | -1.390044 | 3.441062  |
| 1 | 0.254337  | 2.934957  | 2.523485  | 1            | -7.543826 | -1.461741 | 1.765508  |
| 6 | 3.124239  | 4.700696  | 2.056275  | 1            | -6.677537 | -2.833314 | 2.470899  |
| 1 | 5.008865  | 3.850686  | 1.433917  | 6            | -7.247230 | -2.335339 | -1.157492 |
| 1 | 1.115953  | 5.238930  | 2.654848  | 1            | -8.041855 | -2.058306 | -1.863190 |
| 1 | 3.497211  | 5.720808  | 2.083538  | 1            | -6.810328 | -3.274477 | -1.517783 |
| 6 | 0.930300  | 0.040646  | 3.519145  | 1            | -7.719732 | -2.539125 | -0.191096 |
| 6 | -0.203820 | -0.752562 | 3.742430  | 6            | -5.571578 | -0.988443 | -2.473167 |
| 6 | 1.635773  | 0.547920  | 4.617985  | 1            | -6.358109 | -0.781628 | -3.212168 |
| 6 | -0.615635 | -1.049918 | 5.040799  | 1            | -4.872562 | -0.148545 | -2.473396 |
| 1 | -0.779697 | -1.096538 | 2.886964  | 1            | -5.016762 | -1.868026 | -2.821172 |
| 6 | 1.220681  | 0.254863  | 5.917887  | 6            | -5.003129 | -4.426696 | 0.719316  |
| 1 | 2.506405  | 1.176350  | 4.455677  | 1            | -6.059145 | -4.382734 | 0.434146  |
| 6 | 0.097500  | -0.547213 | 6.131409  | 1            | -4.637891 | -5.435792 | 0.484699  |
| 1 | -1.503002 | -1.656707 | 5.198729  | 1            | -4.949198 | -4.310445 | 1.808051  |
| 1 | 1.771274  | 0.657745  | 6.763518  | 6            | -2.672979 | -3.495208 | 0.421226  |
| 1 | -0.227270 | -0.769249 | 7.144184  | 1            | -2.043686 | -2.777769 | -0.106702 |
| 1 | 2.442096  | 4.395354  | -3.789690 | 1            | -2.540115 | -3.316447 | 1.494847  |
| 6 | -2.165358 | 3.284828  | 0.754244  | 1            | -2.293847 | -4.503738 | 0.207293  |
| 6 | -2.928664 | 2.907467  | 1.873808  | 14           | -4.819823 | -1.581877 | 0.212299  |
| 6 | -1.641020 | 4.585910  | 0.725422  |              |           |           |           |
| 6 | -3.143836 | 3.788437  | 2.931219  |              |           |           |           |
| 1 | -3.331226 | 1.898904  | 1.926263  | <b>INT1a</b> |           |           |           |
| 6 | -1.848640 | 5.472750  | 1.786689  | 45           | -0.643987 | 0.388679  | -1.242404 |
| 1 | -1.047313 | 4.908902  | -0.124513 | 17           | -2.214414 | 1.698409  | -2.432666 |
| 6 | -2.596258 | 5.075055  | 2.894347  | 6            | -2.941356 | 0.228724  | 3.114126  |
| 1 | -3.729715 | 3.470923  | 3.790146  | 6            | -2.875399 | 0.960368  | 1.732747  |
| 1 | -1.424003 | 6.472914  | 1.745177  | 6            | -4.406169 | -0.330709 | 3.094724  |
| 1 | -2.754794 | 5.760251  | 3.722952  | 1            | -2.221921 | -0.597183 | 3.133156  |
| 1 | -5.824042 | 3.437825  | -2.650624 | 1            | -2.718685 | 0.870045  | 3.976550  |
| 6 | -3.406802 | -0.460737 | -0.099703 | 1            | -1.947658 | 0.839903  | 1.168858  |
| 6 | -2.360978 | 0.200600  | -0.137581 | 1            | -3.095576 | 2.028819  | 1.816073  |
| 1 | -0.904872 | 1.204229  | 1.663968  | 1            | -4.543153 | -1.310433 | 3.561618  |
|   |           |           |           | 1            | -5.100098 | 0.371801  | 3.570781  |



|    |           |           |           |    |           |           |           |
|----|-----------|-----------|-----------|----|-----------|-----------|-----------|
| 14 | -4.362530 | -0.086792 | 1.207079  | 15 | 0.751092  | -1.310521 | -0.920917 |
| 6  | -3.822708 | -1.636391 | 0.289326  | 6  | 2.037883  | 2.437665  | -0.946107 |
| 6  | -3.371304 | -1.556267 | -1.044360 | 6  | 3.021750  | 3.203673  | -0.306748 |
| 6  | -3.796074 | -2.889411 | 0.918613  | 6  | 2.102021  | 2.257664  | -2.332902 |
| 6  | -2.894015 | -2.685943 | -1.709736 | 6  | 4.066489  | 3.759402  | -1.040115 |
| 1  | -3.401427 | -0.606935 | -1.571748 | 1  | 2.988505  | 3.349149  | 0.767219  |
| 6  | -3.317169 | -4.023174 | 0.256531  | 6  | 3.149104  | 2.816093  | -3.066016 |
| 1  | -4.142837 | -2.983978 | 1.944713  | 1  | 1.326795  | 1.671366  | -2.817537 |
| 6  | -2.859695 | -3.920902 | -1.055865 | 6  | 4.135507  | 3.562051  | -2.420920 |
| 1  | -2.544856 | -2.604603 | -2.734311 | 1  | 4.836755  | 4.330892  | -0.531326 |
| 1  | -3.295456 | -4.981594 | 0.768654  | 1  | 3.194179  | 2.663066  | -4.140567 |
| 6  | 4.350057  | -2.489688 | 3.437928  | 1  | 4.956456  | 3.989350  | -2.989594 |
| 6  | 4.001890  | -1.701508 | 2.364010  | 6  | -0.137252 | 3.177982  | 0.755902  |
| 6  | 2.871531  | -0.841314 | 2.422157  | 6  | -1.304999 | 3.725839  | 0.212173  |
| 6  | 2.098345  | -0.822986 | 3.625592  | 6  | 0.465730  | 3.810962  | 1.856181  |
| 6  | 2.476520  | -1.653642 | 4.710823  | 6  | -1.860257 | 4.883308  | 0.760821  |
| 6  | 3.580946  | -2.469990 | 4.624120  | 1  | -1.782140 | 3.243686  | -0.632979 |
| 1  | 5.219649  | -3.137326 | 3.371027  | 6  | -0.093565 | 4.963837  | 2.402682  |
| 1  | 4.591851  | -1.736084 | 1.456387  | 1  | 1.359809  | 3.392699  | 2.306085  |
| 6  | 2.462081  | -0.034782 | 1.307996  | 6  | -1.260268 | 5.503348  | 1.856068  |
| 6  | 0.954091  | 0.010390  | 3.690917  | 1  | -2.769716 | 5.292250  | 0.330112  |
| 1  | 1.872531  | -1.632664 | 5.614197  | 1  | 0.380219  | 5.437579  | 3.258020  |
| 1  | 3.862284  | -3.101358 | 5.461995  | 1  | -1.698413 | 6.400052  | 2.285437  |
| 6  | 0.598166  | 0.802132  | 2.630328  | 6  | 0.644353  | -2.399347 | 0.541958  |
| 6  | 1.354538  | 0.801986  | 1.423519  | 6  | 1.636935  | -3.341447 | 0.849633  |
| 1  | 0.350714  | 0.008194  | 4.594746  | 6  | -0.474478 | -2.277353 | 1.370706  |
| 6  | 7.044041  | 1.442906  | -0.620143 | 6  | 1.508949  | -4.148341 | 1.977082  |
| 6  | 6.419710  | 0.755986  | -1.635528 | 1  | 2.520704  | -3.419756 | 0.223049  |
| 6  | 5.136558  | 0.181164  | -1.443923 | 6  | -0.600028 | -3.085839 | 2.499930  |
| 6  | 4.485862  | 0.329155  | -0.178091 | 1  | -1.237274 | -1.549560 | 1.121543  |
| 6  | 5.160237  | 1.041644  | 0.850587  | 6  | 0.391736  | -4.016951 | 2.806812  |
| 6  | 6.407150  | 1.582187  | 0.635973  | 1  | 2.290218  | -4.860976 | 2.223069  |
| 1  | 4.976194  | -0.653951 | -3.431711 | 1  | -1.473838 | -2.984005 | 3.136457  |
| 1  | 8.025768  | 1.879771  | -0.778706 | 1  | 0.300260  | -4.638670 | 3.692924  |
| 1  | 6.899288  | 0.643847  | -2.604452 | 6  | 0.430896  | -2.412801 | -2.355911 |
| 6  | 4.475074  | -0.529646 | -2.475178 | 6  | 0.105072  | -1.801658 | -3.579648 |
| 6  | 3.171583  | -0.202819 | 0.001090  | 6  | 0.399308  | -3.809237 | -2.260531 |
| 1  | 4.671914  | 1.161733  | 1.810799  | 6  | -0.245016 | -2.575439 | -4.685692 |
| 1  | 6.905043  | 2.125830  | 1.433807  | 1  | 0.105931  | -0.715914 | -3.651313 |
| 6  | 2.542541  | -0.876798 | -1.044604 | 6  | 0.051900  | -4.580905 | -3.369649 |
| 6  | 3.217830  | -1.047152 | -2.281119 | 1  | 0.620268  | -4.292357 | -1.315721 |
| 1  | -0.286304 | 1.421482  | 2.702302  | 6  | -0.274271 | -3.967864 | -4.581246 |
| 1  | 2.724882  | -1.578904 | -3.086549 | 1  | -0.505893 | -2.089831 | -5.621444 |
| 15 | 0.630196  | 1.695259  | -0.023953 | 1  | 0.026334  | -5.663757 | -3.283894 |

|              |           |           |           |    |           |           |           |
|--------------|-----------|-----------|-----------|----|-----------|-----------|-----------|
| 1            | -0.554934 | -4.572530 | -5.438905 | 6  | 2.466575  | -0.608762 | 0.819579  |
| 1            | -2.476713 | -4.795418 | -1.573151 | 6  | 2.135048  | -0.233473 | 3.597225  |
| 6            | -5.807597 | 0.752975  | 0.366276  | 1  | 3.332052  | -2.102821 | 5.121206  |
| 6            | -7.116084 | 0.605850  | 0.856137  | 1  | 4.645426  | -4.040127 | 4.306457  |
| 6            | -5.606802 | 1.546129  | -0.778296 | 6  | 1.602772  | 0.659438  | 2.704972  |
| 6            | -8.194988 | 1.223815  | 0.222260  | 6  | 1.793836  | 0.510448  | 1.299331  |
| 1            | -7.295227 | 0.004104  | 1.745005  | 1  | 1.972064  | -0.105431 | 4.664587  |
| 6            | -6.684299 | 2.163618  | -1.414127 | 6  | 6.124825  | -0.291177 | -2.815903 |
| 1            | -4.605263 | 1.683599  | -1.179458 | 6  | 5.032754  | -0.841427 | -3.446269 |
| 6            | -7.979124 | 2.003283  | -0.915762 | 6  | 3.829110  | -1.085566 | -2.735814 |
| 1            | -9.200897 | 1.099180  | 0.615040  | 6  | 3.753560  | -0.749346 | -1.347536 |
| 1            | -6.510979 | 2.770726  | -2.298743 | 6  | 4.904050  | -0.193197 | -0.724236 |
| 1            | -8.817547 | 2.486170  | -1.411116 | 6  | 6.057818  | 0.031811  | -1.439452 |
|              |           |           |           | 1  | 2.751977  | -1.929061 | -4.409572 |
|              |           |           |           | 1  | 7.040228  | -0.104723 | -3.370270 |
|              |           |           |           | 1  | 5.072307  | -1.094333 | -4.502769 |
|              |           |           |           | 6  | 2.690353  | -1.645793 | -3.361716 |
|              |           |           |           | 6  | 2.524832  | -0.934398 | -0.640957 |
|              |           |           |           | 1  | 4.854853  | 0.066239  | 0.327060  |
|              |           |           |           | 1  | 6.923549  | 0.464700  | -0.946189 |
|              |           |           |           | 6  | 1.404209  | -1.439846 | -1.303034 |
|              |           |           |           | 6  | 1.517890  | -1.816973 | -2.667775 |
|              |           |           |           | 1  | 0.994346  | 1.480615  | 3.065459  |
|              |           |           |           | 1  | 0.658898  | -2.237197 | -3.175679 |
|              |           |           |           | 15 | 0.819686  | 1.655899  | 0.226581  |
|              |           |           |           | 15 | -0.265822 | -1.422041 | -0.484459 |
|              |           |           |           | 6  | 1.739365  | 1.854832  | -1.361468 |
|              |           |           |           | 6  | 3.038055  | 2.380974  | -1.406009 |
|              |           |           |           | 6  | 1.084332  | 1.555488  | -2.560415 |
|              |           |           |           | 6  | 3.679762  | 2.571878  | -2.626356 |
|              |           |           |           | 1  | 3.548195  | 2.635716  | -0.482458 |
|              |           |           |           | 6  | 1.724404  | 1.751253  | -3.784871 |
|              |           |           |           | 1  | 0.075682  | 1.153824  | -2.516688 |
|              |           |           |           | 6  | 3.024776  | 2.254652  | -3.819012 |
|              |           |           |           | 1  | 4.695189  | 2.955960  | -2.647708 |
|              |           |           |           | 1  | 1.208978  | 1.504091  | -4.708899 |
|              |           |           |           | 1  | 3.528256  | 2.400635  | -4.770551 |
|              |           |           |           | 6  | 1.196883  | 3.345298  | 0.879272  |
|              |           |           |           | 6  | 0.538205  | 4.401939  | 0.230871  |
|              |           |           |           | 6  | 2.134776  | 3.650135  | 1.872044  |
|              |           |           |           | 6  | 0.798188  | 5.725567  | 0.573714  |
|              |           |           |           | 1  | -0.183405 | 4.178074  | -0.549498 |
|              |           |           |           | 6  | 2.384206  | 4.978348  | 2.229639  |
|              |           |           |           | 1  | 2.686392  | 2.857761  | 2.364803  |
| <b>INT6a</b> |           |           |           |    |           |           |           |
| 45           | -1.217205 | 0.514430  | 0.111862  | 1  | 5.072307  | -1.094333 | -4.502769 |
| 6            | -4.148822 | 2.844430  | -2.362102 | 6  | 2.690353  | -1.645793 | -3.361716 |
| 6            | -3.426742 | 1.462310  | -2.285457 | 6  | 2.524832  | -0.934398 | -0.640957 |
| 6            | -5.148033 | 2.723690  | -1.167757 | 1  | 4.854853  | 0.066239  | 0.327060  |
| 1            | -3.425917 | 3.647033  | -2.169172 | 1  | 6.923549  | 0.464700  | -0.946189 |
| 1            | -4.616936 | 3.060275  | -3.330934 | 6  | 1.404209  | -1.439846 | -1.303034 |
| 1            | -2.353578 | 1.478173  | -2.489177 | 6  | 1.517890  | -1.816973 | -2.667775 |
| 1            | -3.894293 | 0.716355  | -2.939538 | 1  | 0.994346  | 1.480615  | 3.065459  |
| 1            | -5.310895 | 3.642147  | -0.595324 | 1  | 0.658898  | -2.237197 | -3.175679 |
| 1            | -6.124615 | 2.354784  | -1.503103 | 15 | 0.819686  | 1.655899  | 0.226581  |
| 14           | -4.052191 | 1.299176  | -0.488497 | 15 | -0.265822 | -1.422041 | -0.484459 |
| 6            | -2.929090 | 1.924079  | 0.894239  | 6  | 1.739365  | 1.854832  | -1.361468 |
| 6            | -2.561672 | 3.297068  | 0.968961  | 6  | 3.038055  | 2.380974  | -1.406009 |
| 6            | -2.547057 | 1.087766  | 1.984443  | 6  | 1.084332  | 1.555488  | -2.560415 |
| 6            | -1.886630 | 3.813896  | 2.060107  | 6  | 3.679762  | 2.571878  | -2.626356 |
| 1            | -2.845692 | 3.962767  | 0.157643  | 1  | 3.548195  | 2.635716  | -0.482458 |
| 6            | -1.822322 | 1.621008  | 3.076784  | 6  | 1.724404  | 1.751253  | -3.784871 |
| 1            | -2.985953 | 0.101635  | 2.084845  | 1  | 0.075682  | 1.153824  | -2.516688 |
| 6            | -1.497597 | 2.965760  | 3.114184  | 6  | 3.024776  | 2.254652  | -3.819012 |
| 1            | -1.628597 | 4.866821  | 2.094315  | 1  | 4.695189  | 2.955960  | -2.647708 |
| 1            | -1.545929 | 0.965031  | 3.898166  | 1  | 1.208978  | 1.504091  | -4.708899 |
| 6            | 4.370221  | -3.539772 | 2.212928  | 1  | 3.528256  | 2.400635  | -4.770551 |
| 6            | 3.807551  | -2.667780 | 1.307502  | 6  | 1.196883  | 3.345298  | 0.879272  |
| 6            | 3.062364  | -1.537872 | 1.741244  | 6  | 0.538205  | 4.401939  | 0.230871  |
| 6            | 2.897803  | -1.341717 | 3.148232  | 6  | 2.134776  | 3.650135  | 1.872044  |
| 6            | 3.475322  | -2.264871 | 4.055763  | 6  | 0.798188  | 5.725567  | 0.573714  |
| 6            | 4.202933  | -3.341661 | 3.601918  | 1  | -0.183405 | 4.178074  | -0.549498 |
| 1            | 4.940854  | -4.392353 | 1.855438  | 6  | 2.384206  | 4.978348  | 2.229639  |
| 1            | 3.932350  | -2.839690 | 0.245567  | 1  | 2.686392  | 2.857761  | 2.364803  |

|   |           |           |           |
|---|-----------|-----------|-----------|
| 6 | 1.716597  | 6.018775  | 1.585618  |
| 1 | 0.279830  | 6.528748  | 0.056938  |
| 1 | 3.112772  | 5.195788  | 3.006147  |
| 1 | 1.915173  | 7.050507  | 1.861871  |
| 6 | 0.001914  | -2.567486 | 0.924907  |
| 6 | 0.753233  | -3.742530 | 0.783436  |
| 6 | -0.514221 | -2.230484 | 2.181220  |
| 6 | 0.985562  | -4.565091 | 1.883287  |
| 1 | 1.179116  | -3.996858 | -0.182929 |
| 6 | -0.277680 | -3.052906 | 3.282515  |
| 1 | -1.071111 | -1.305065 | 2.277667  |
| 6 | 0.475234  | -4.218173 | 3.136419  |
| 1 | 1.586004  | -5.462723 | 1.769290  |
| 1 | -0.667769 | -2.774362 | 4.257642  |
| 1 | 0.674534  | -4.850569 | 3.996794  |
| 6 | -1.319658 | -2.379264 | -1.657141 |
| 6 | -1.784002 | -1.715405 | -2.804825 |
| 6 | -1.768191 | -3.678876 | -1.403040 |
| 6 | -2.654981 | -2.344897 | -3.689743 |
| 1 | -1.480081 | -0.689136 | -2.984032 |
| 6 | -2.659813 | -4.303690 | -2.280245 |
| 1 | -1.440372 | -4.200879 | -0.511458 |
| 6 | -3.101487 | -3.644027 | -3.425929 |
| 1 | -3.003425 | -1.815451 | -4.572228 |
| 1 | -3.008820 | -5.309292 | -2.061820 |
| 1 | -3.795128 | -4.131280 | -4.105256 |
| 1 | -0.947336 | 3.374117  | 3.957673  |
| 6 | -4.970305 | -0.250929 | 0.040715  |
| 6 | -5.766608 | -0.247237 | 1.197997  |
| 6 | -4.875647 | -1.446467 | -0.692399 |
| 6 | -6.436197 | -1.399012 | 1.617018  |
| 1 | -5.861536 | 0.664348  | 1.784979  |
| 6 | -5.543961 | -2.598755 | -0.280877 |
| 1 | -4.254009 | -1.484853 | -1.580951 |
| 6 | -6.323738 | -2.578204 | 0.878023  |
| 1 | -7.042913 | -1.376889 | 2.518760  |
| 1 | -5.443983 | -3.512746 | -0.859910 |
| 1 | -6.841268 | -3.476656 | 1.204201  |
| 1 | -2.427705 | -0.521992 | -0.000675 |
